# Supplementary material for: Complex causal association between genetically predicted 731 immunocyte phenotype and osteonecrosis: a bidirectional two-sample Mendelian randomization analysis
Source: PubMed Central journal article supplement (PMC11175804; doi:10.1097/js9.0000000000001327), 2024-03-18

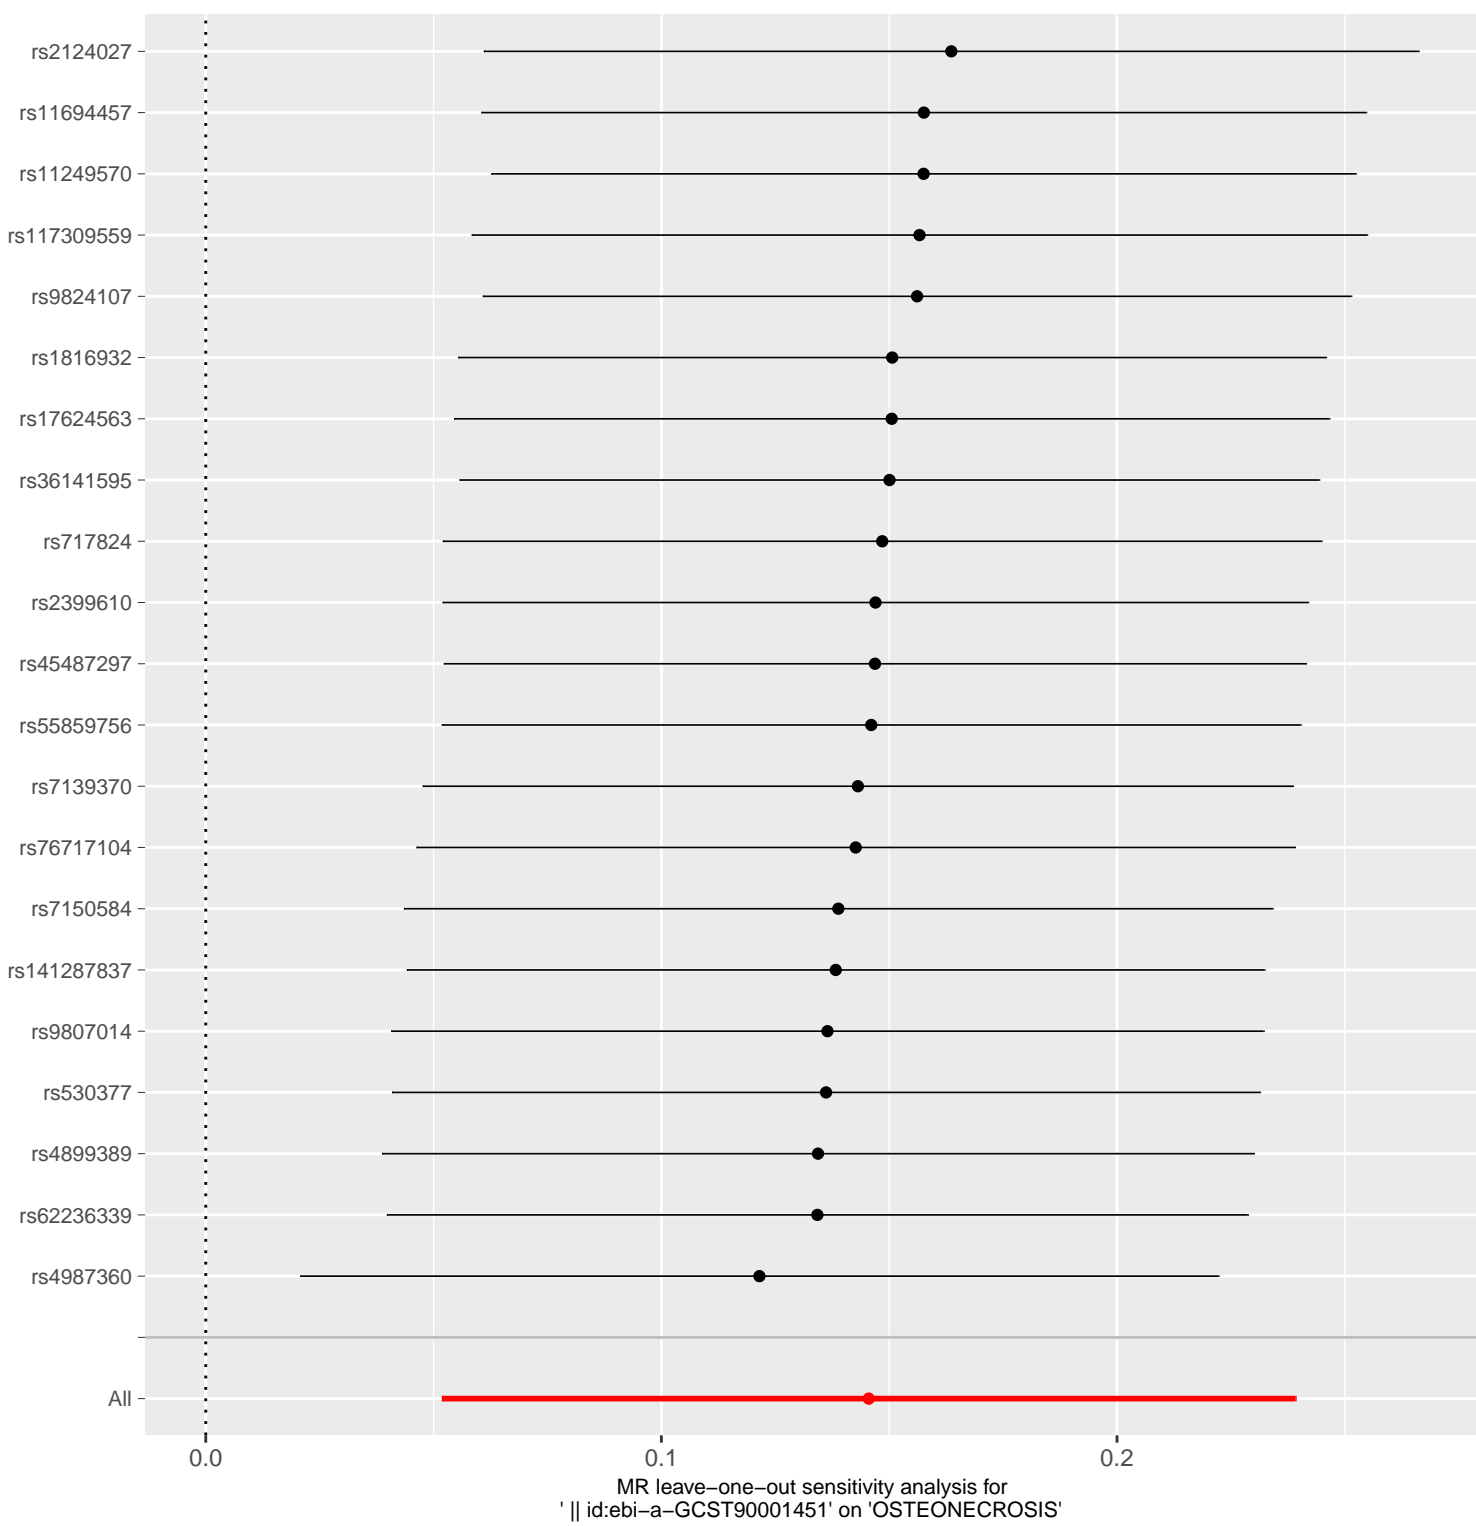

### MR Test

- Inverse variance weighted
- MR Egger
- Simple mode
- Weighted median
- Weighted mode

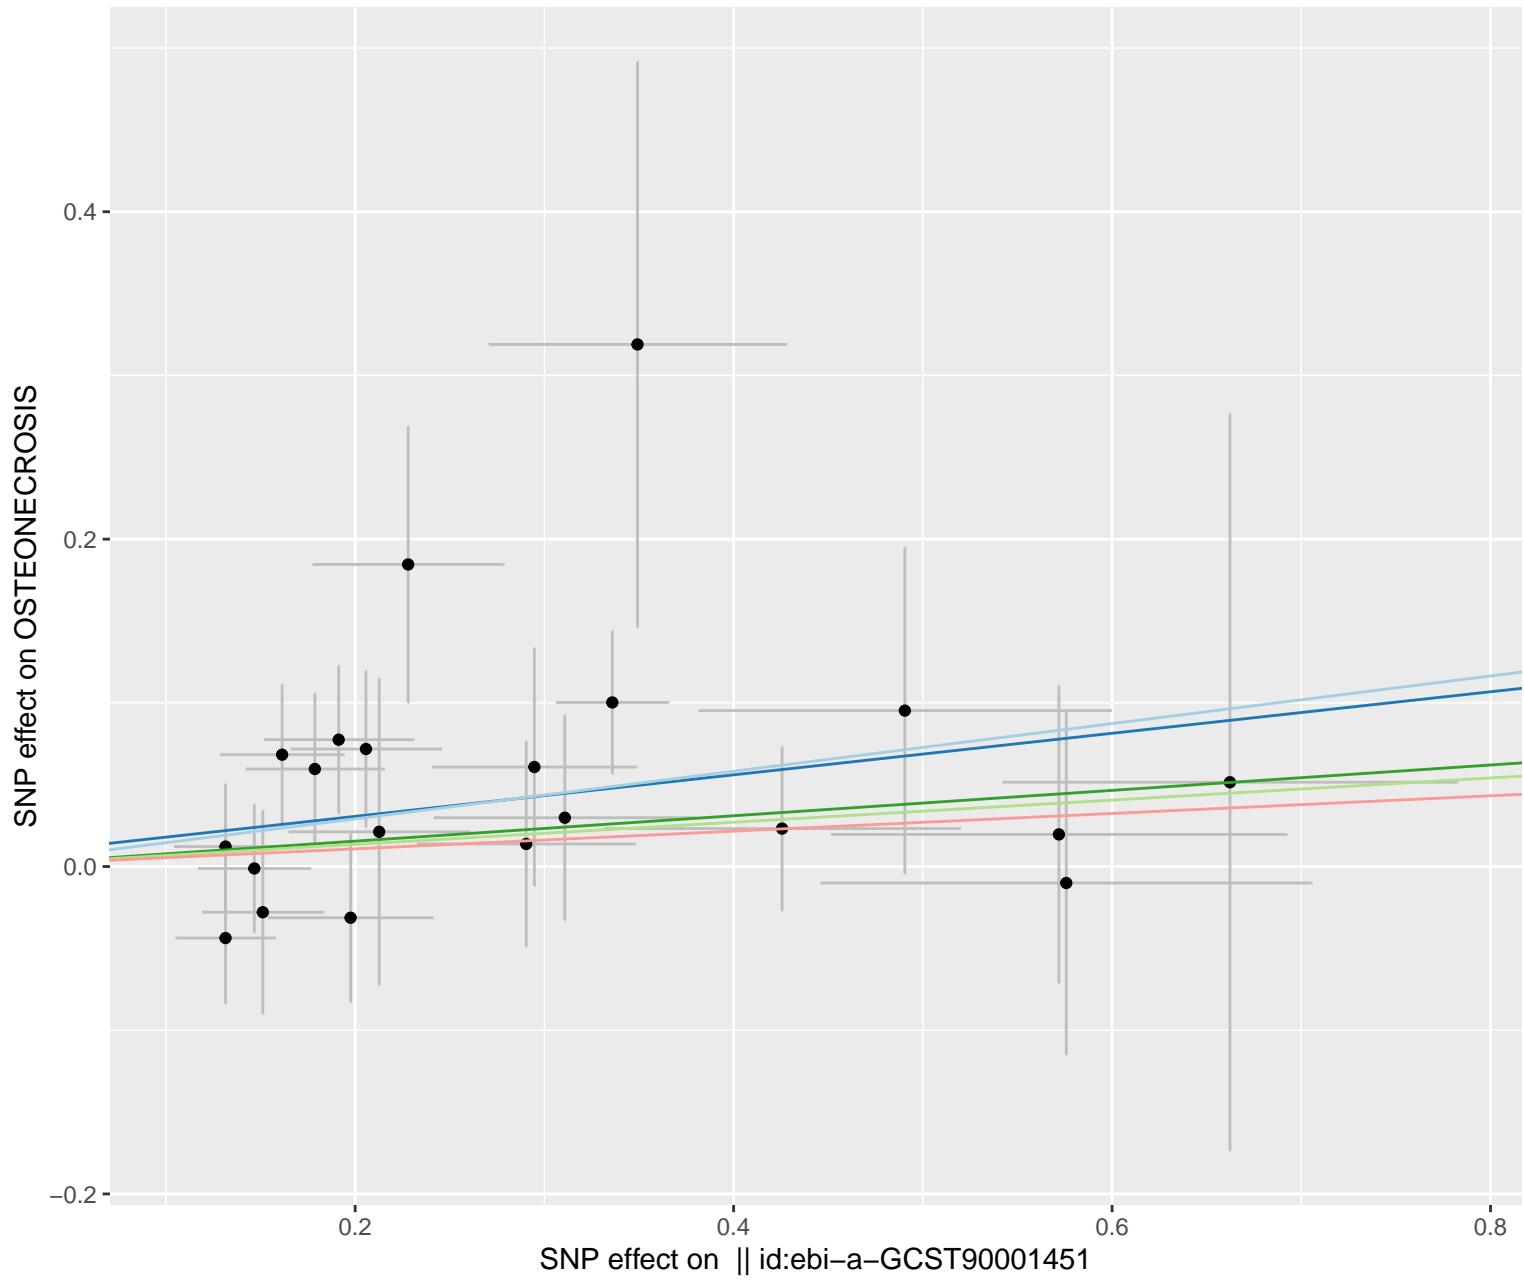

MR Method

- Inverse variance weighted
- MR Egger

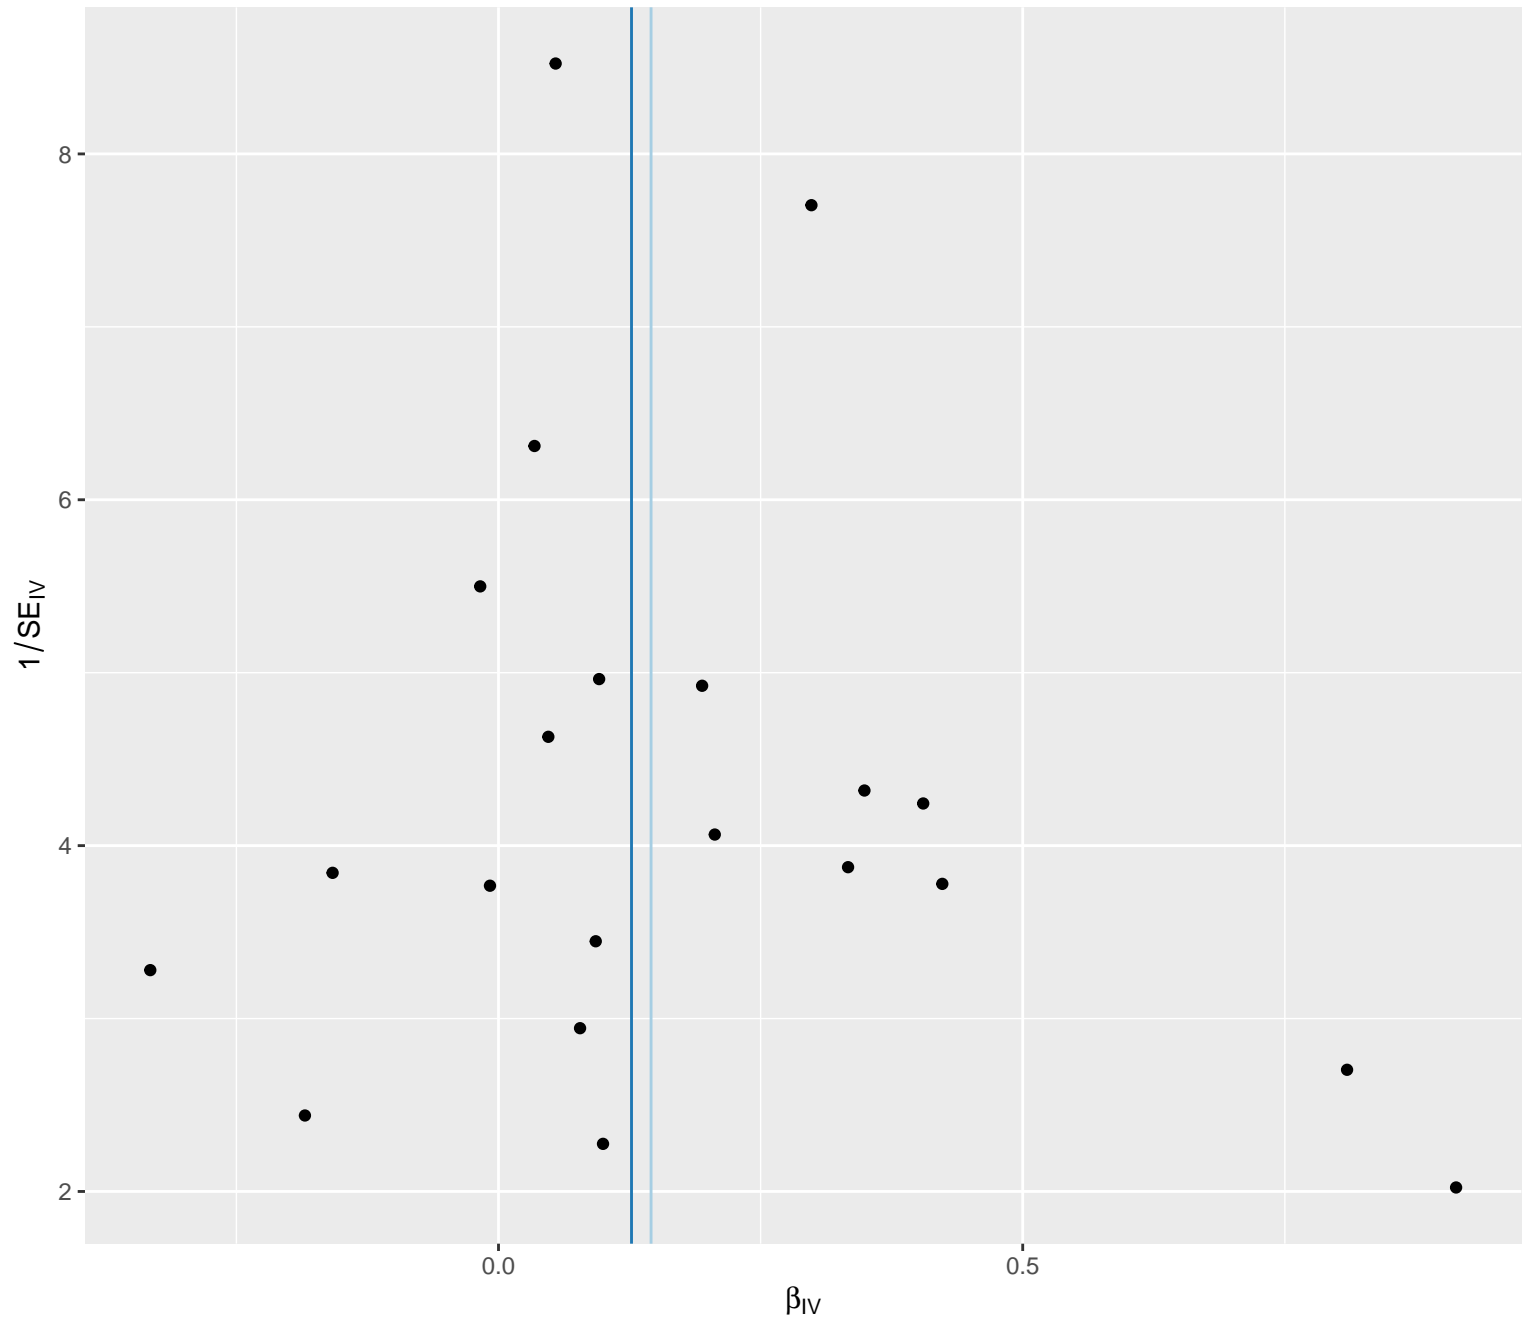

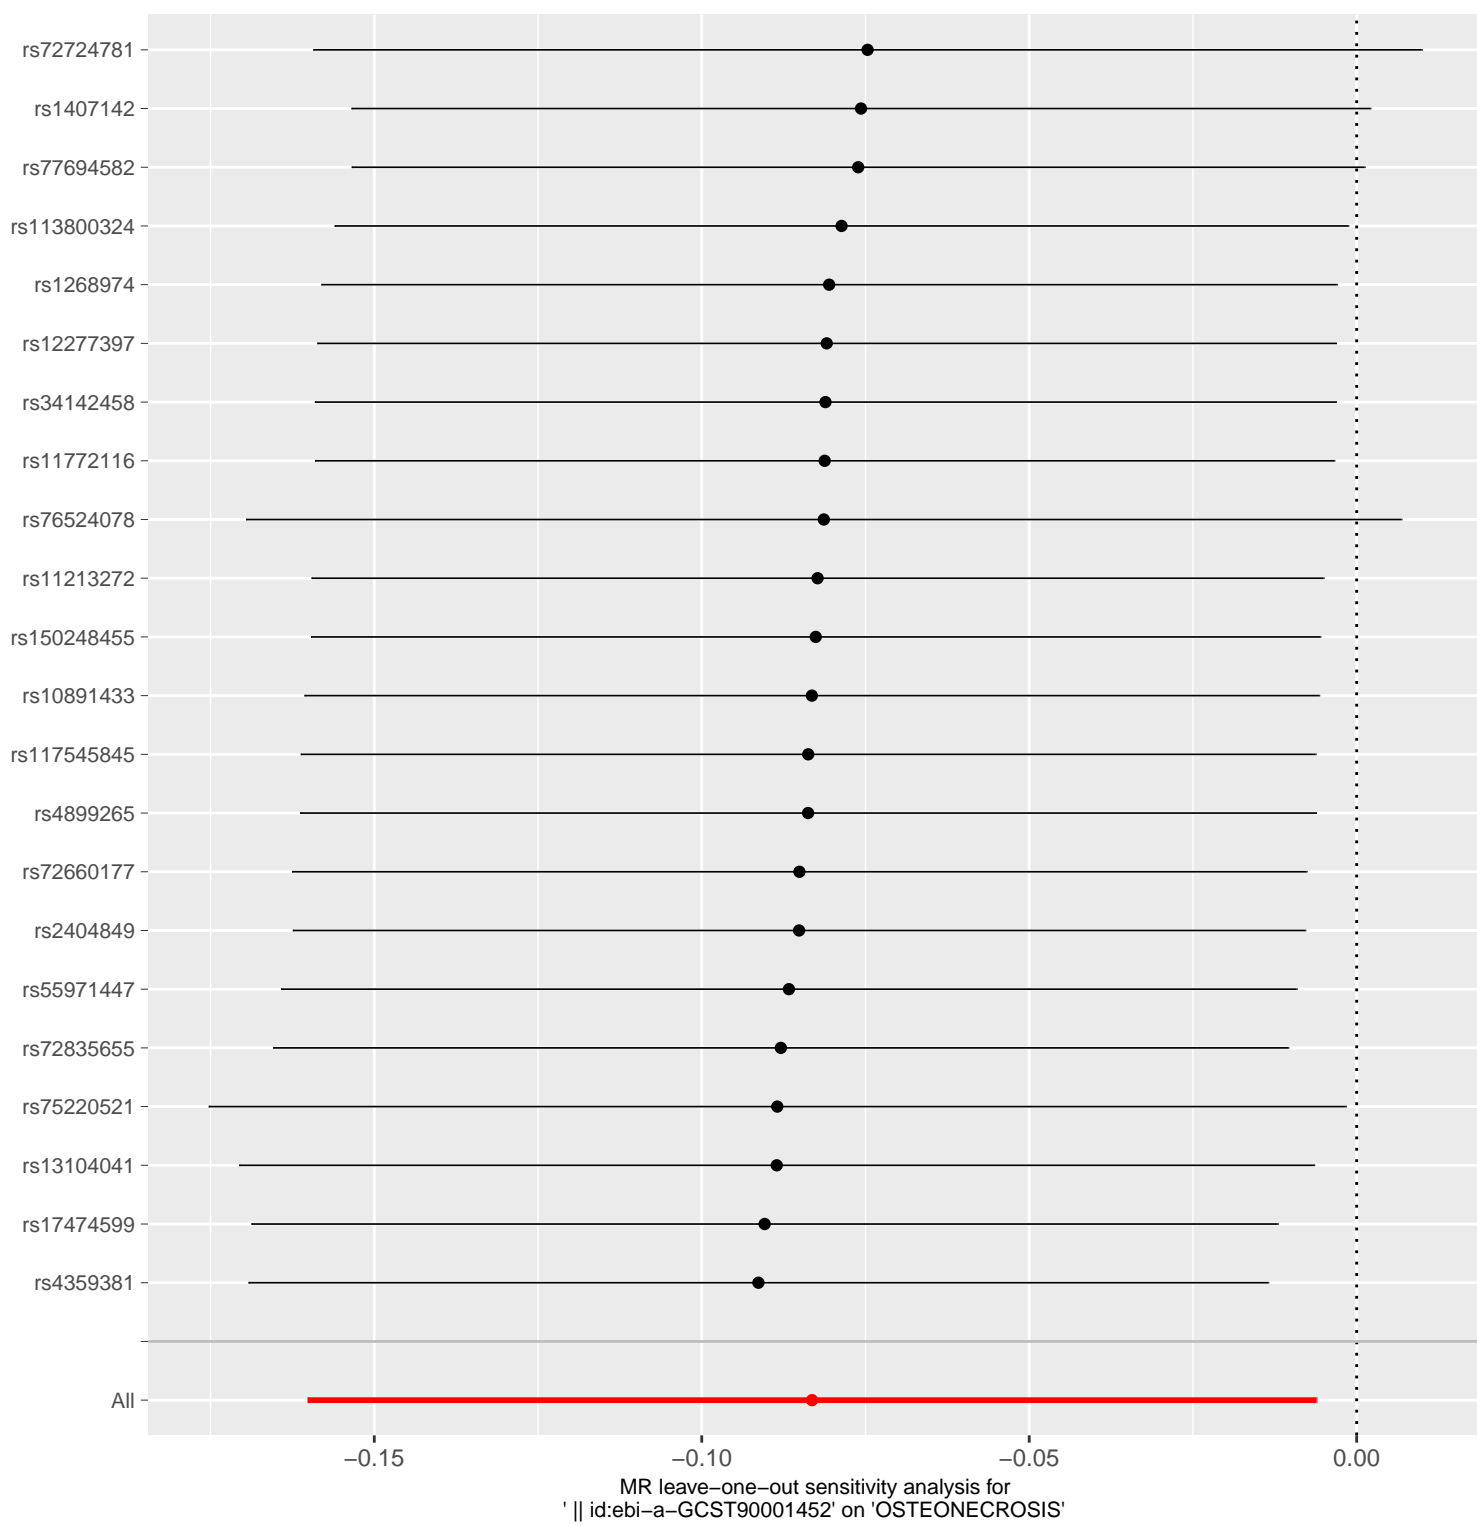

MR Test

- Inverse variance weighted
- MR Egger
- Simple mode
- Weighted median
- Weighted mode

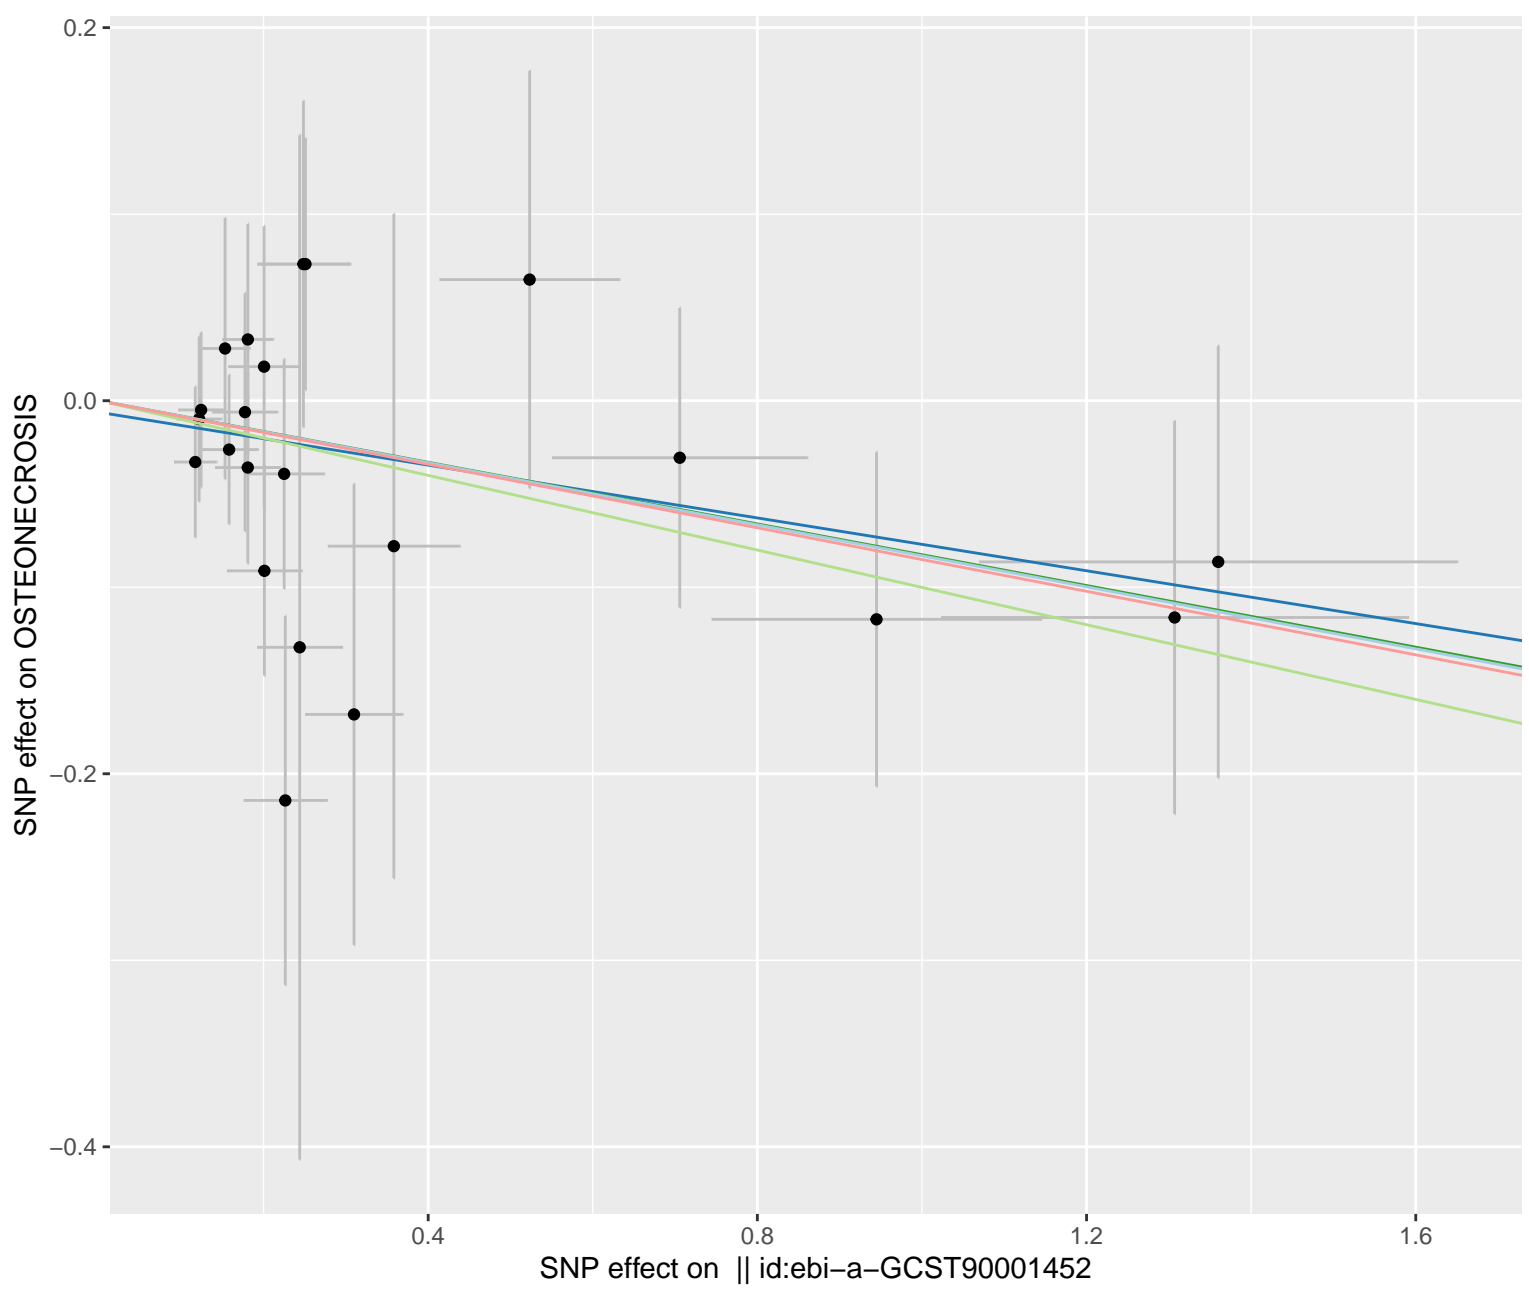

MR Method

- Inverse variance weighted
- MR Egger

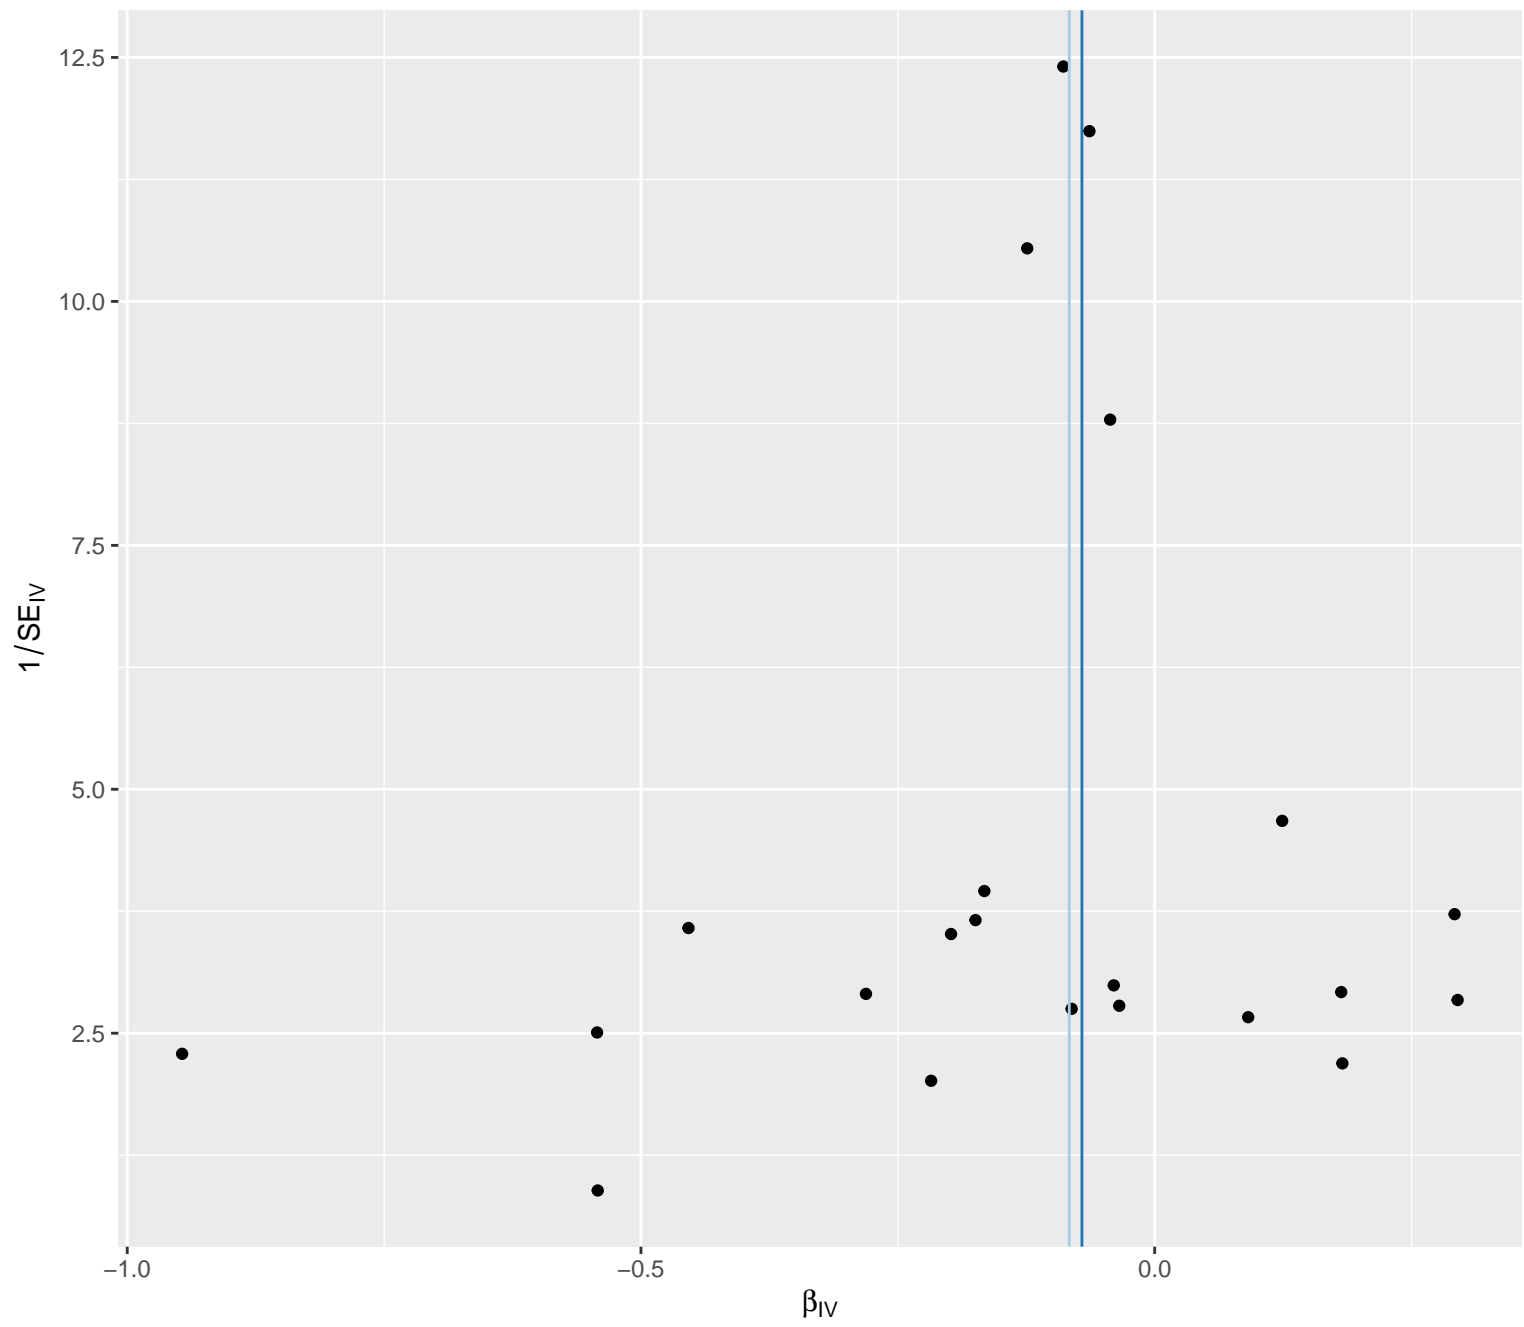

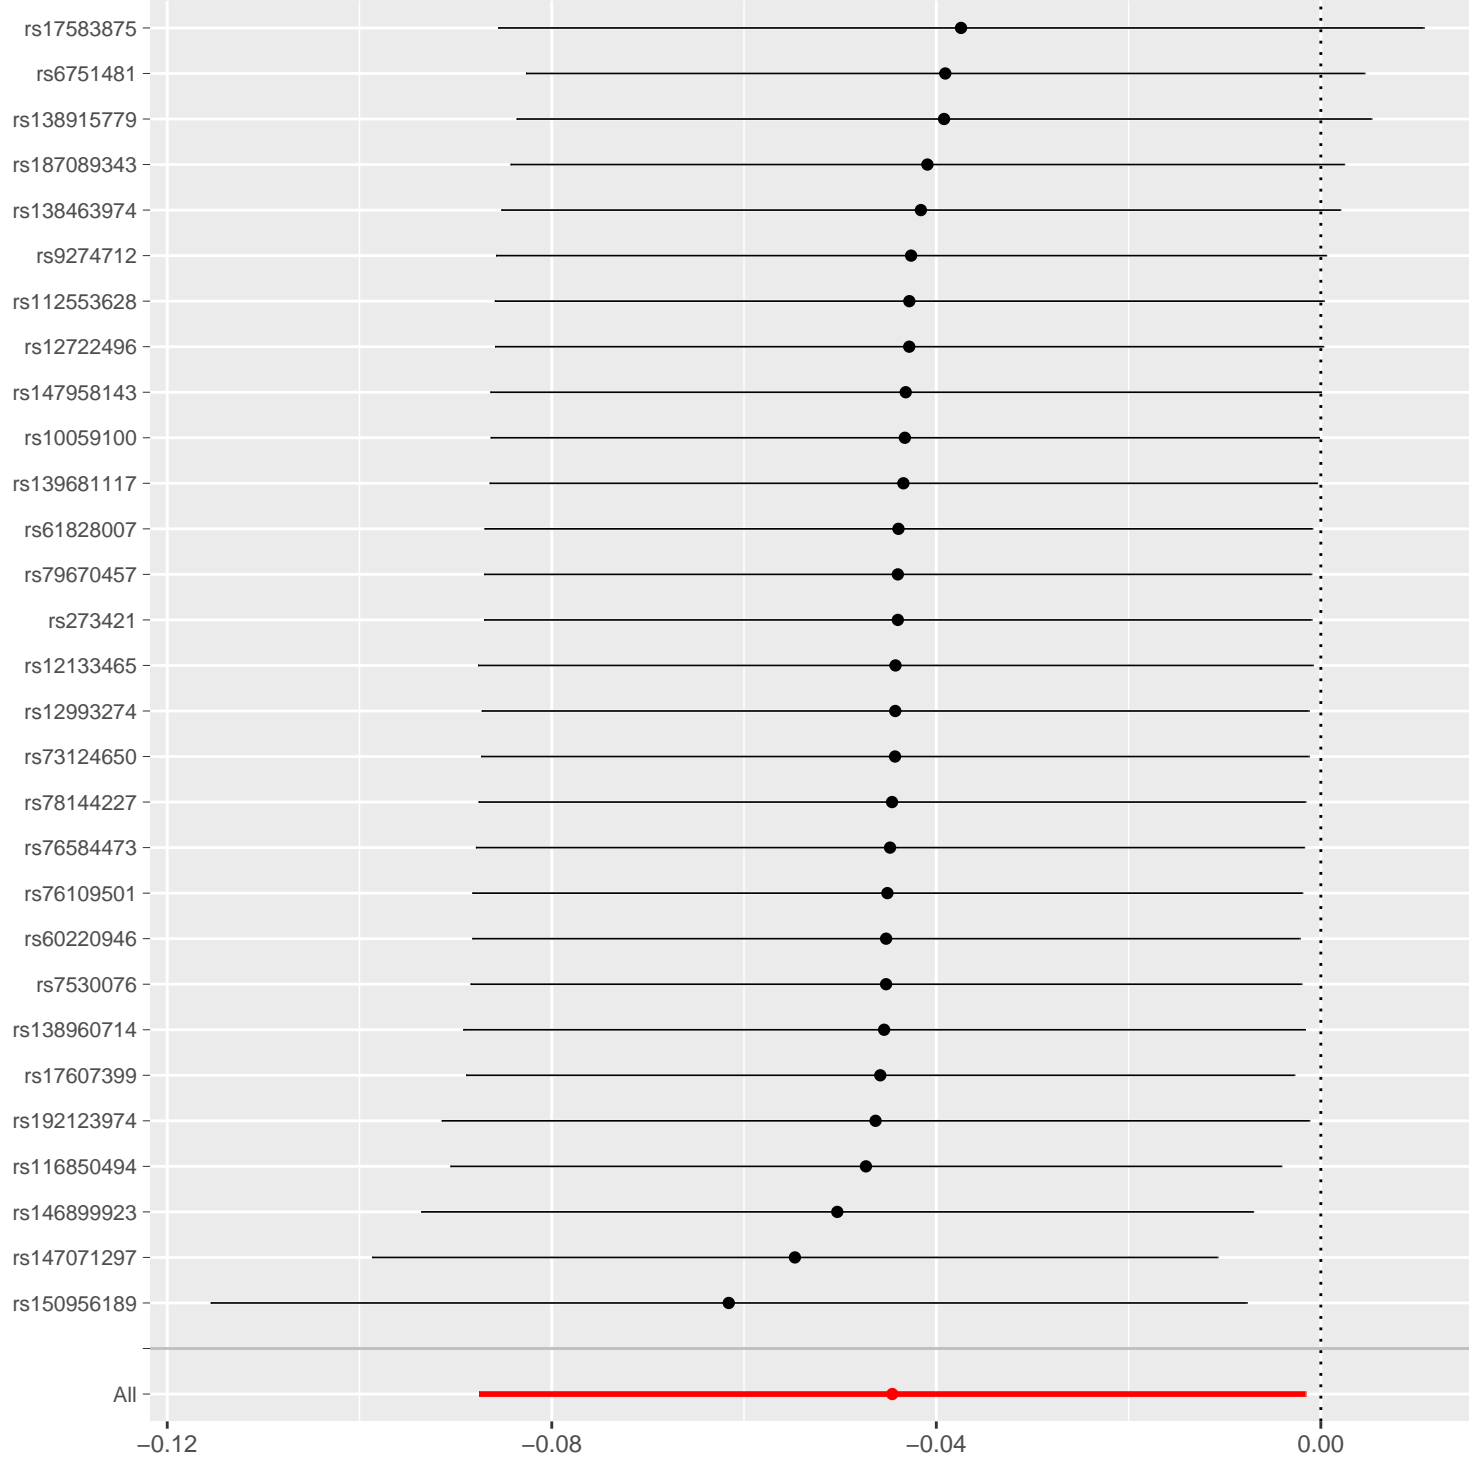

MR leave-one-out sensitivity analysis for 'id:ebi-a-GCST90001481' on 'OSTEONECROSIS'

MR Test

- Inverse variance weighted
- MR Egger
- Simple mode
- Weighted median
- Weighted mode

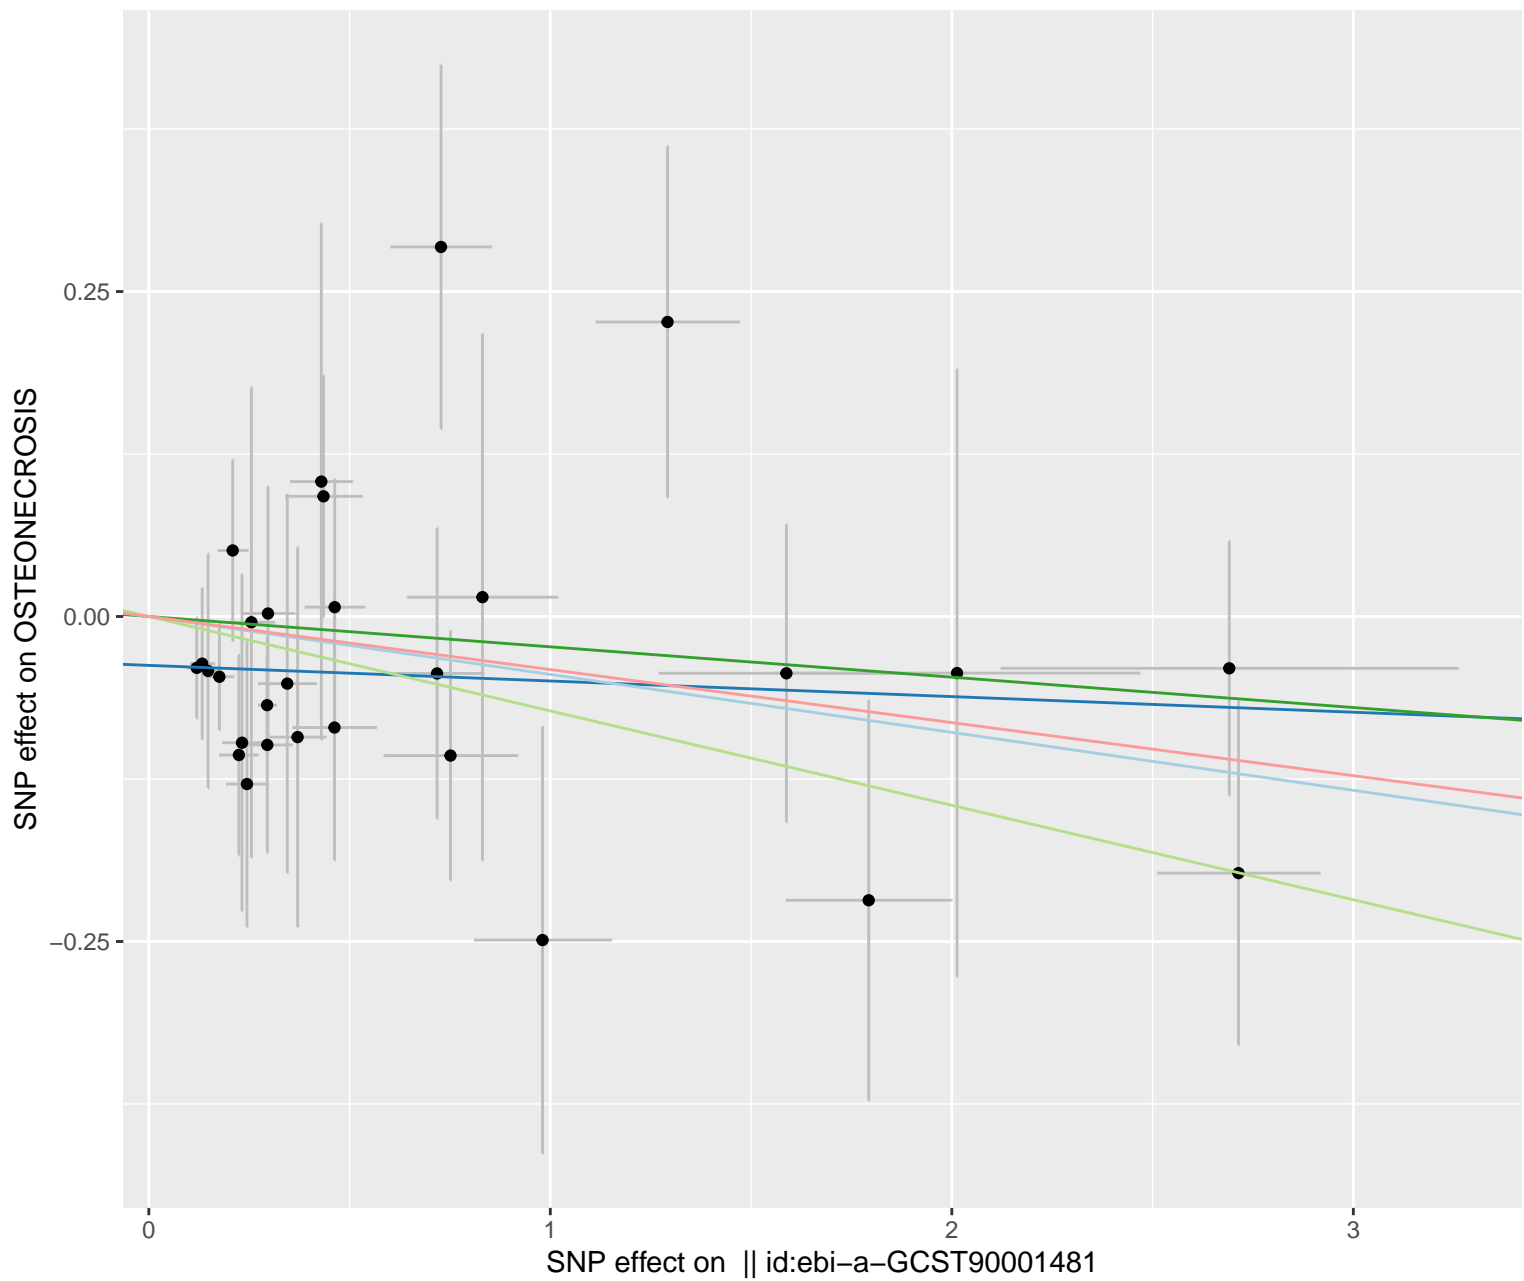



MR Method

- Inverse variance weighted
- MR Egger

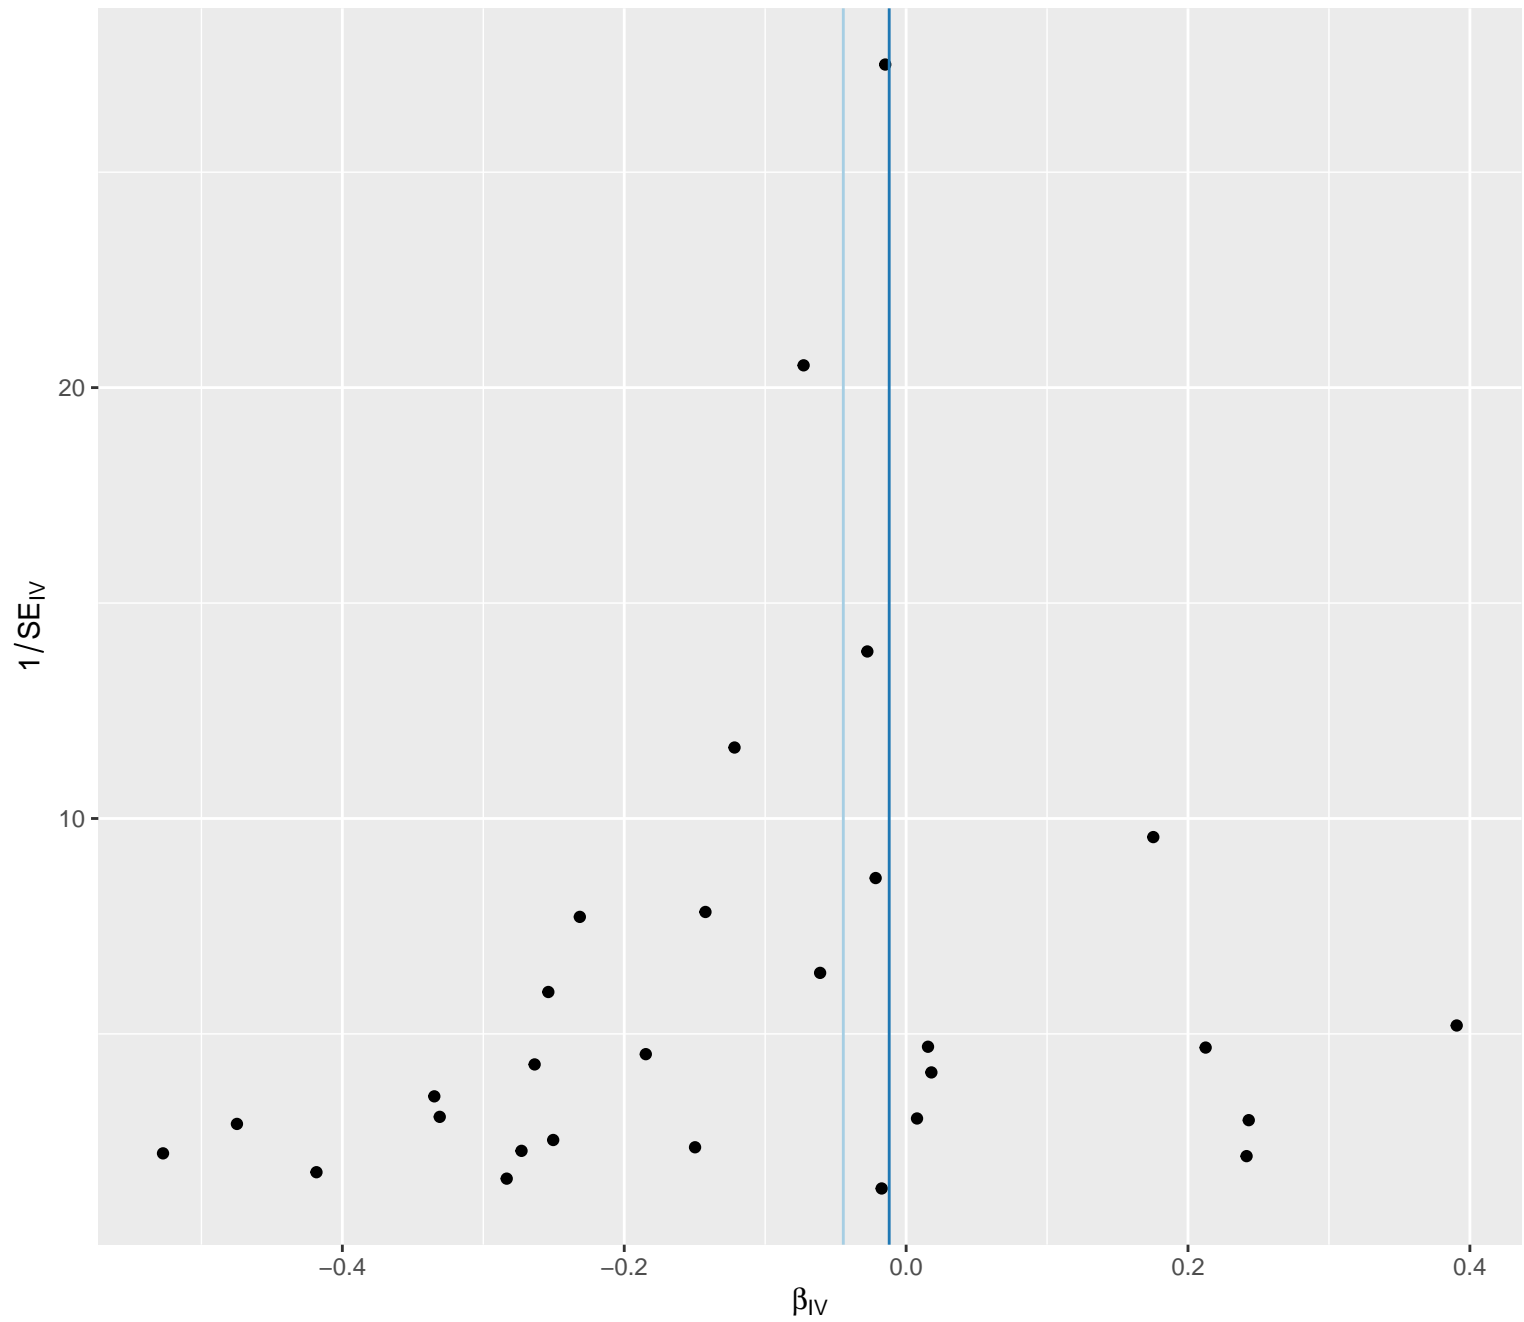

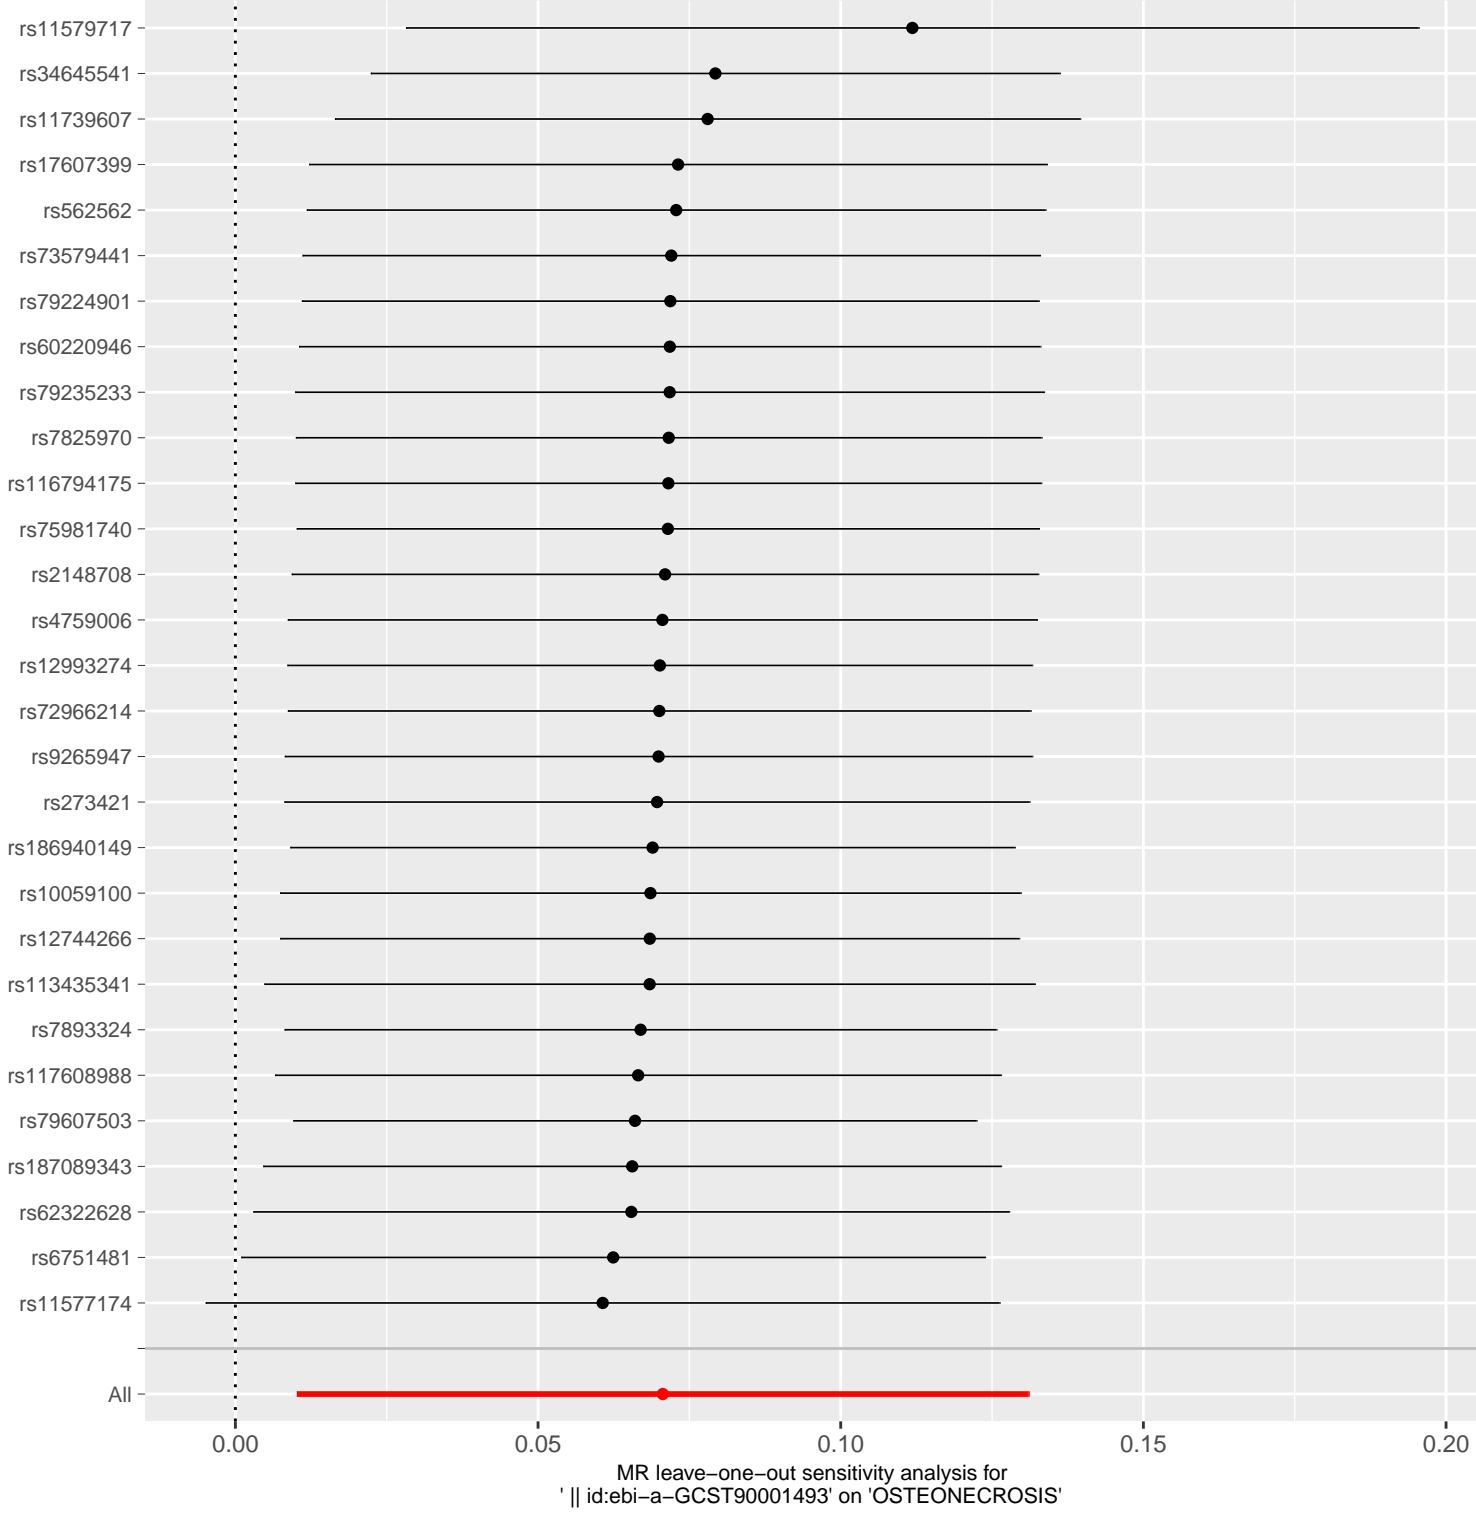

### MR Test

- Inverse variance weighted
- MR Egger
- Simple mode
- Weighted median
- Weighted mode

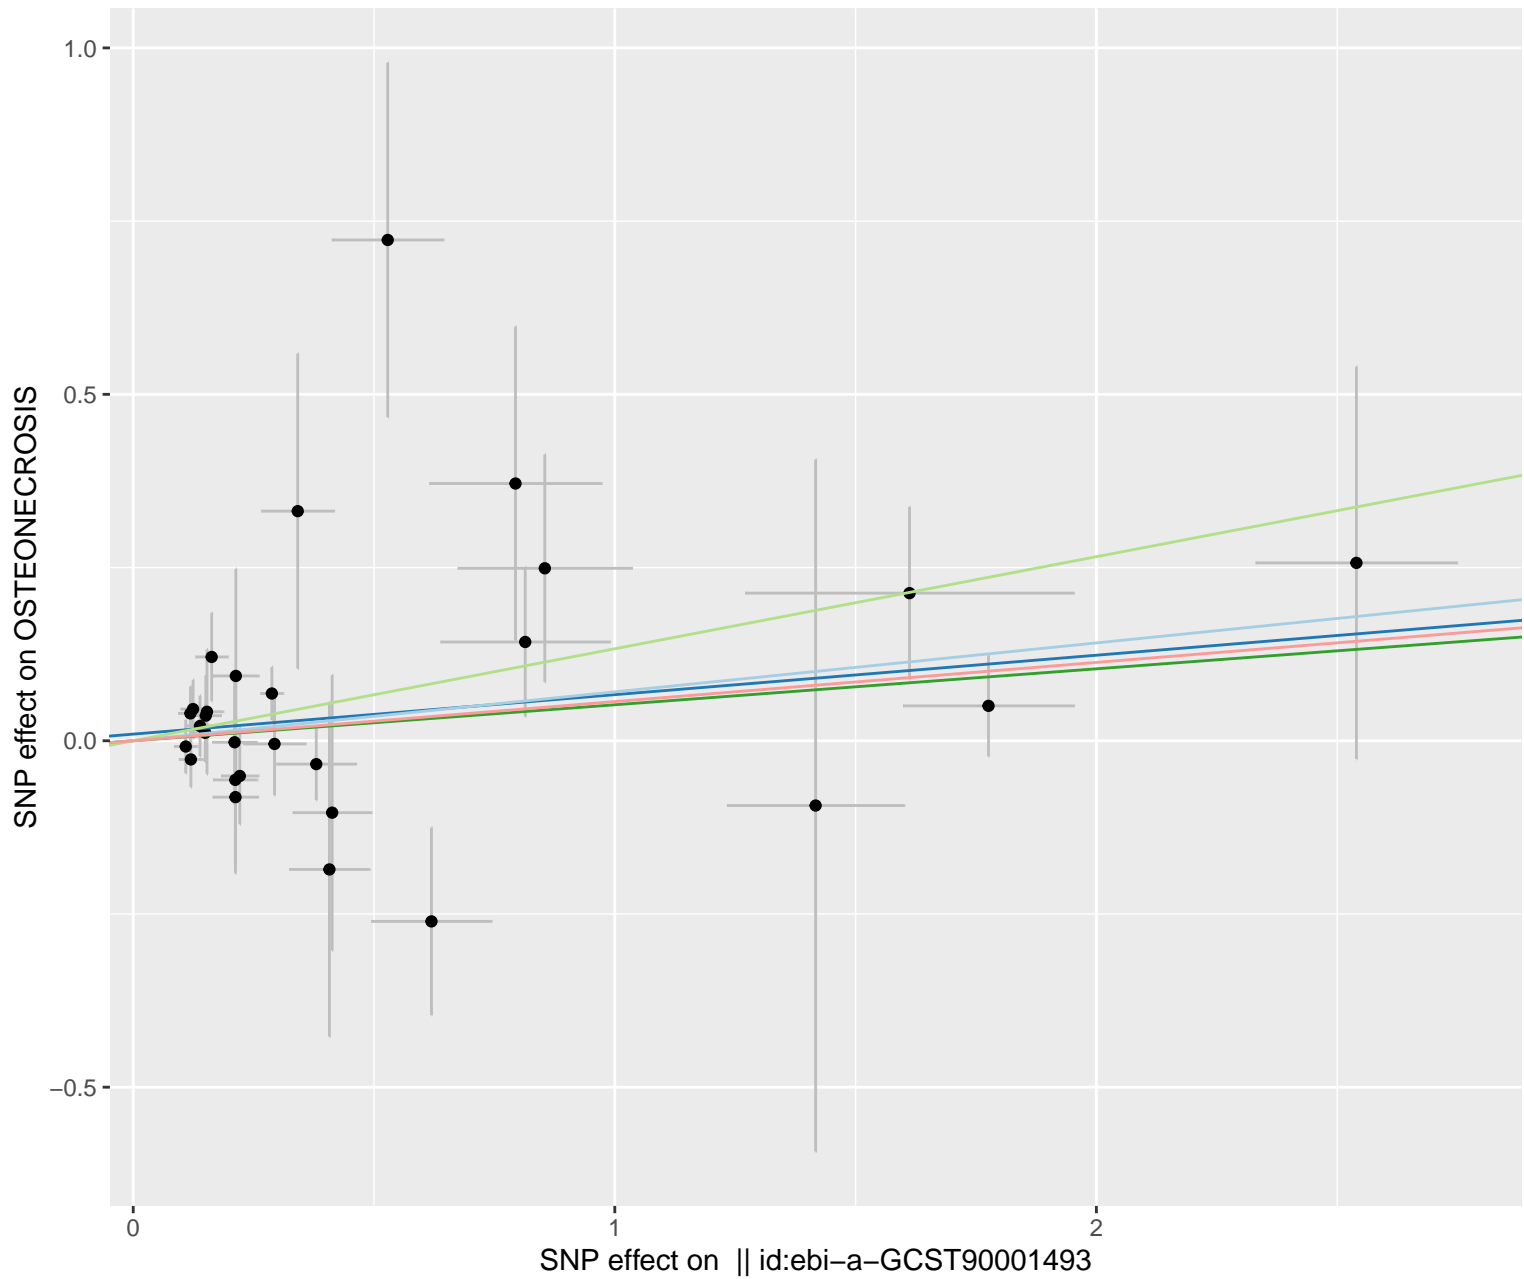

MR Method

- Inverse variance weighted
- MR Egger

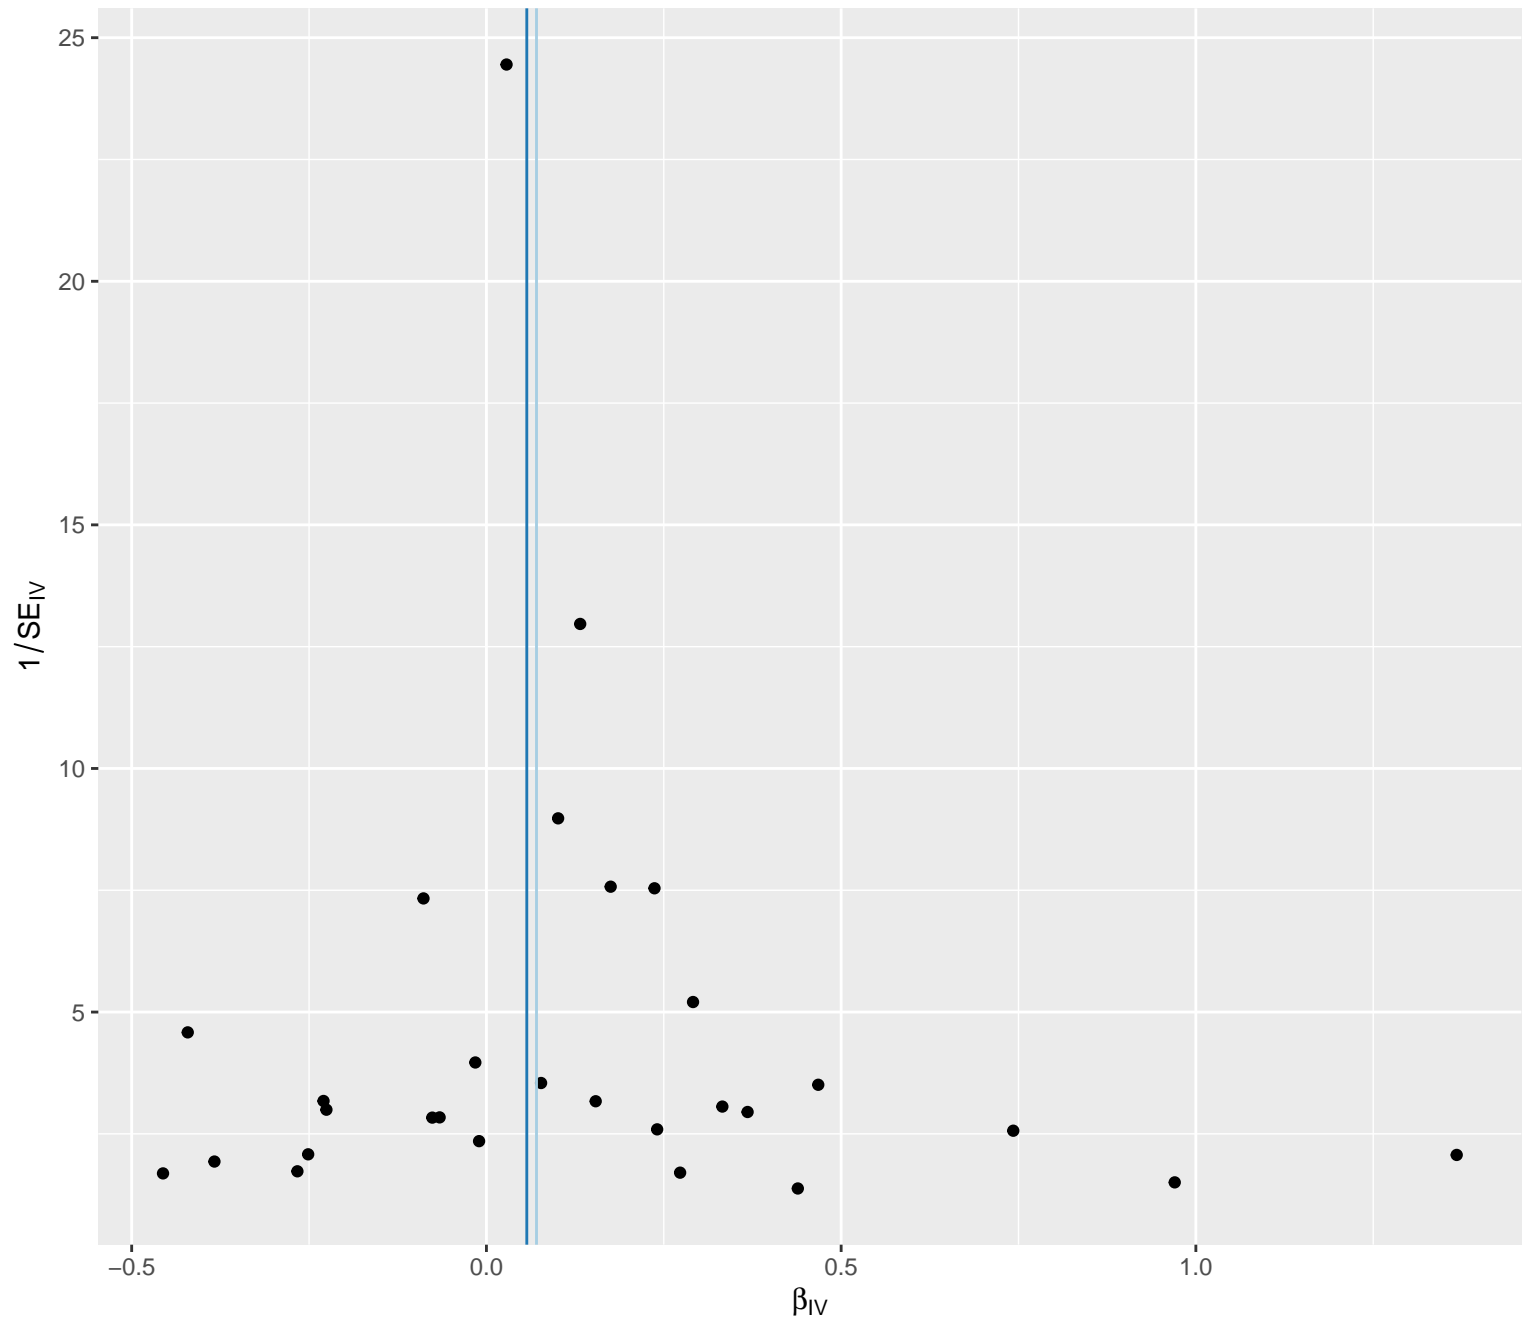

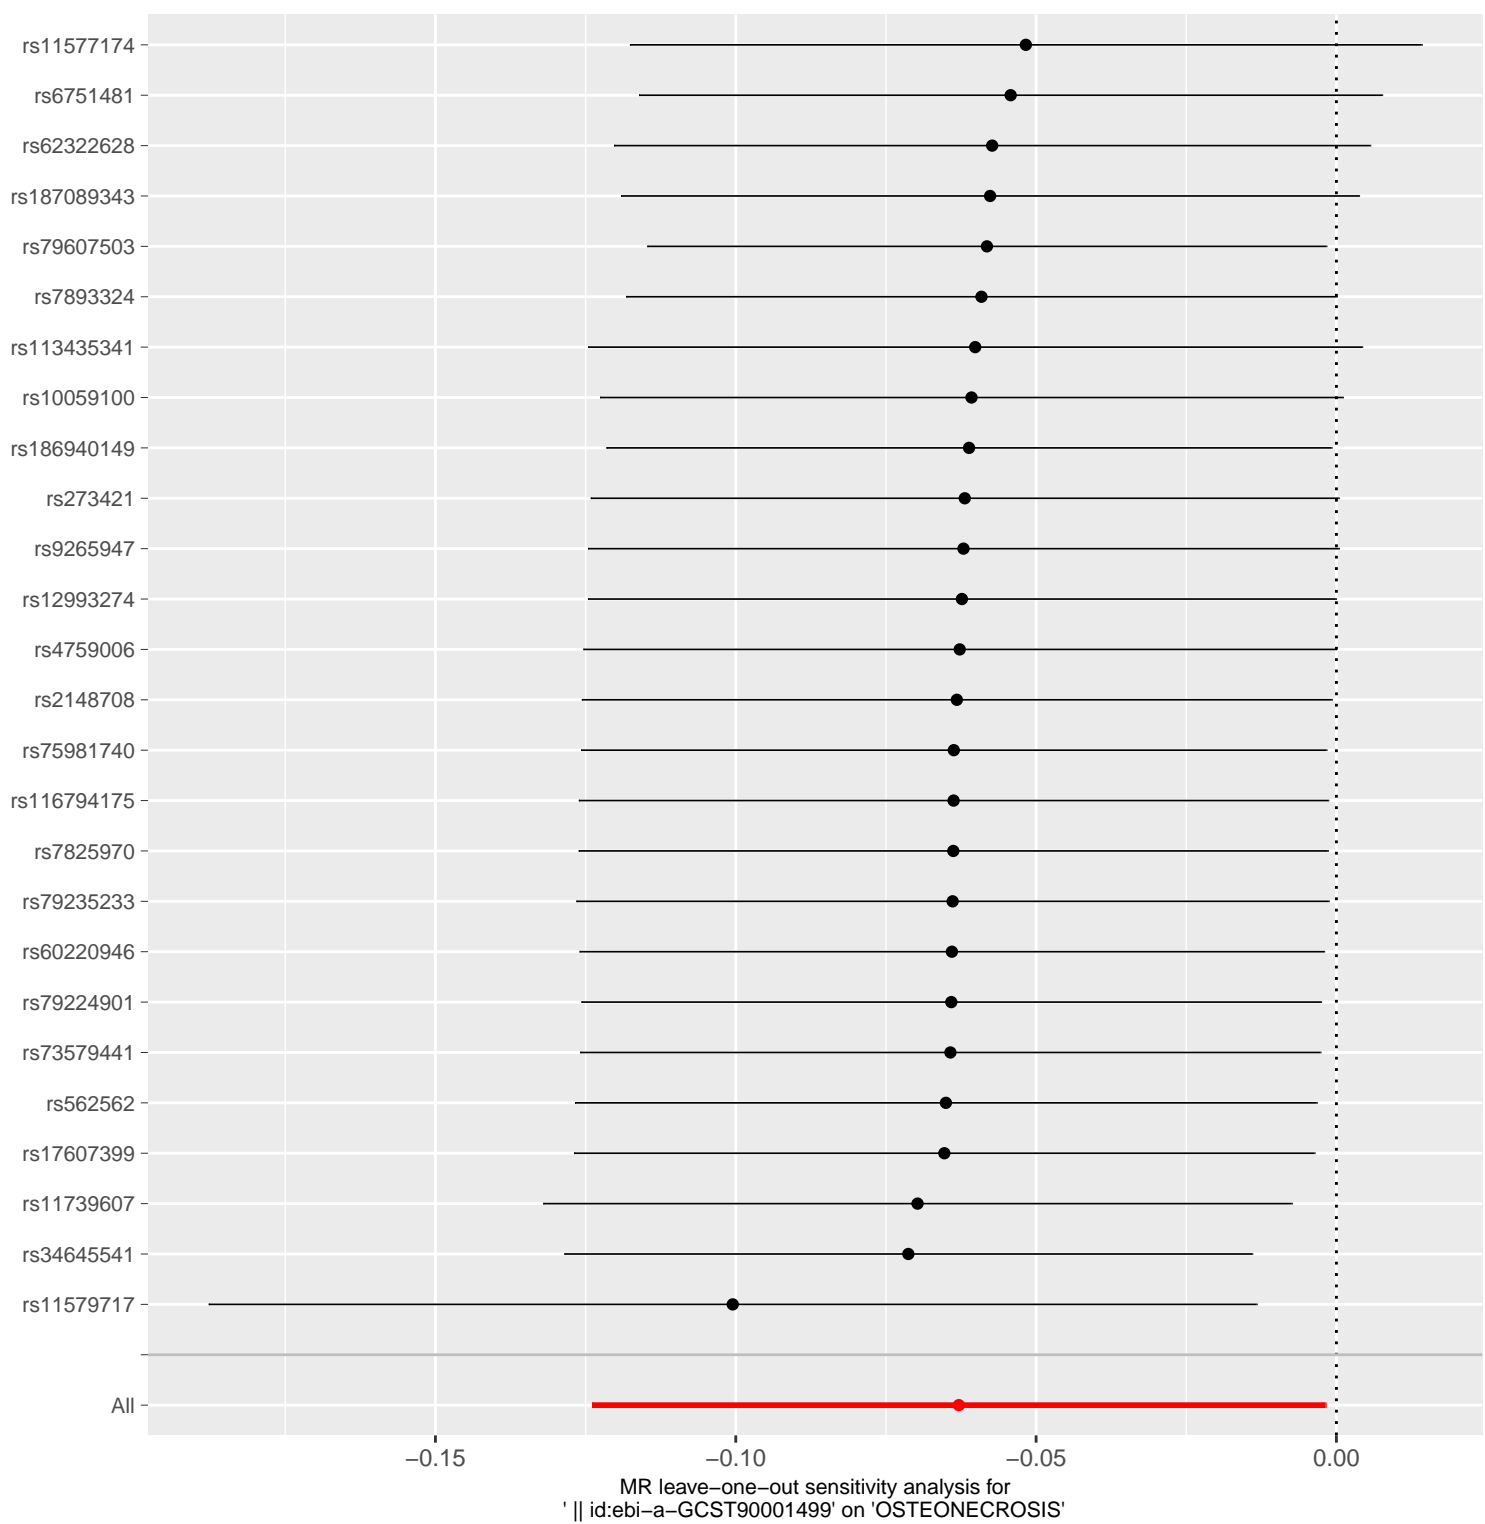

### MR Test

- Inverse variance weighted
- MR Egger
- Simple mode
- Weighted median
- Weighted mode

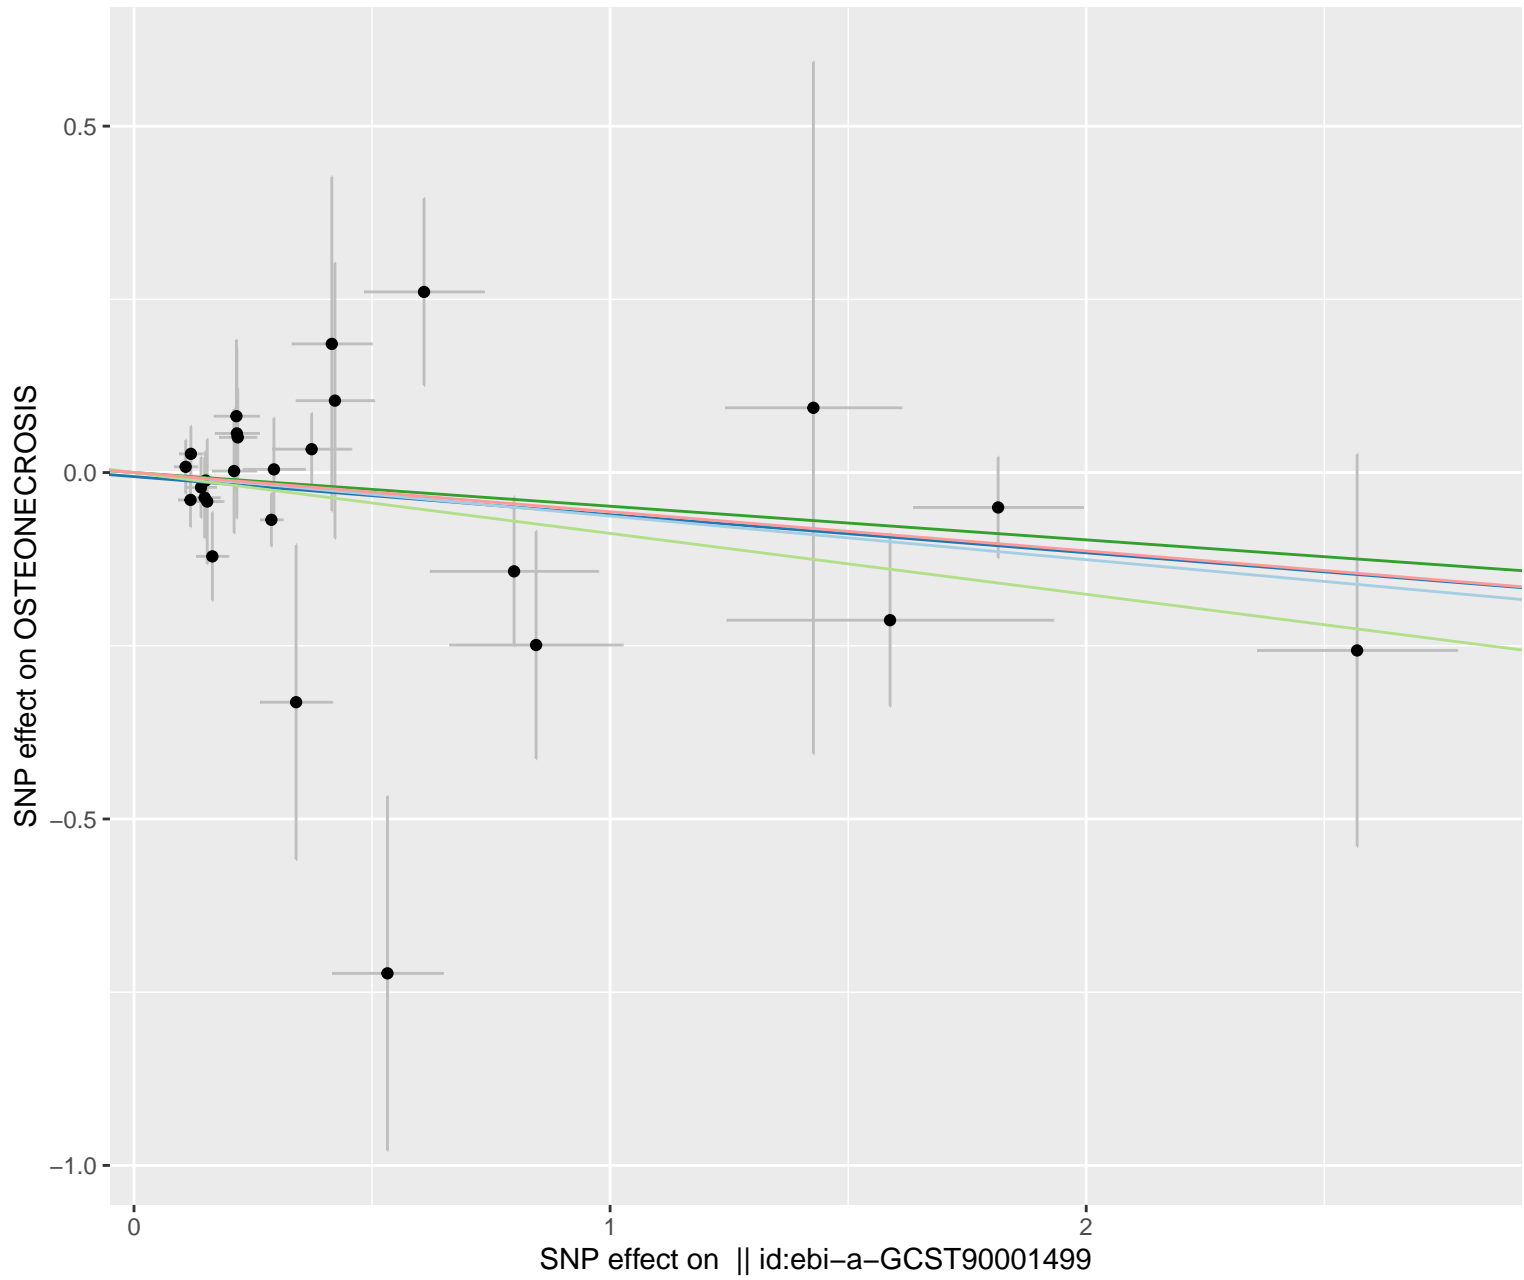

MR Method

- Inverse variance weighted
- MR Egger

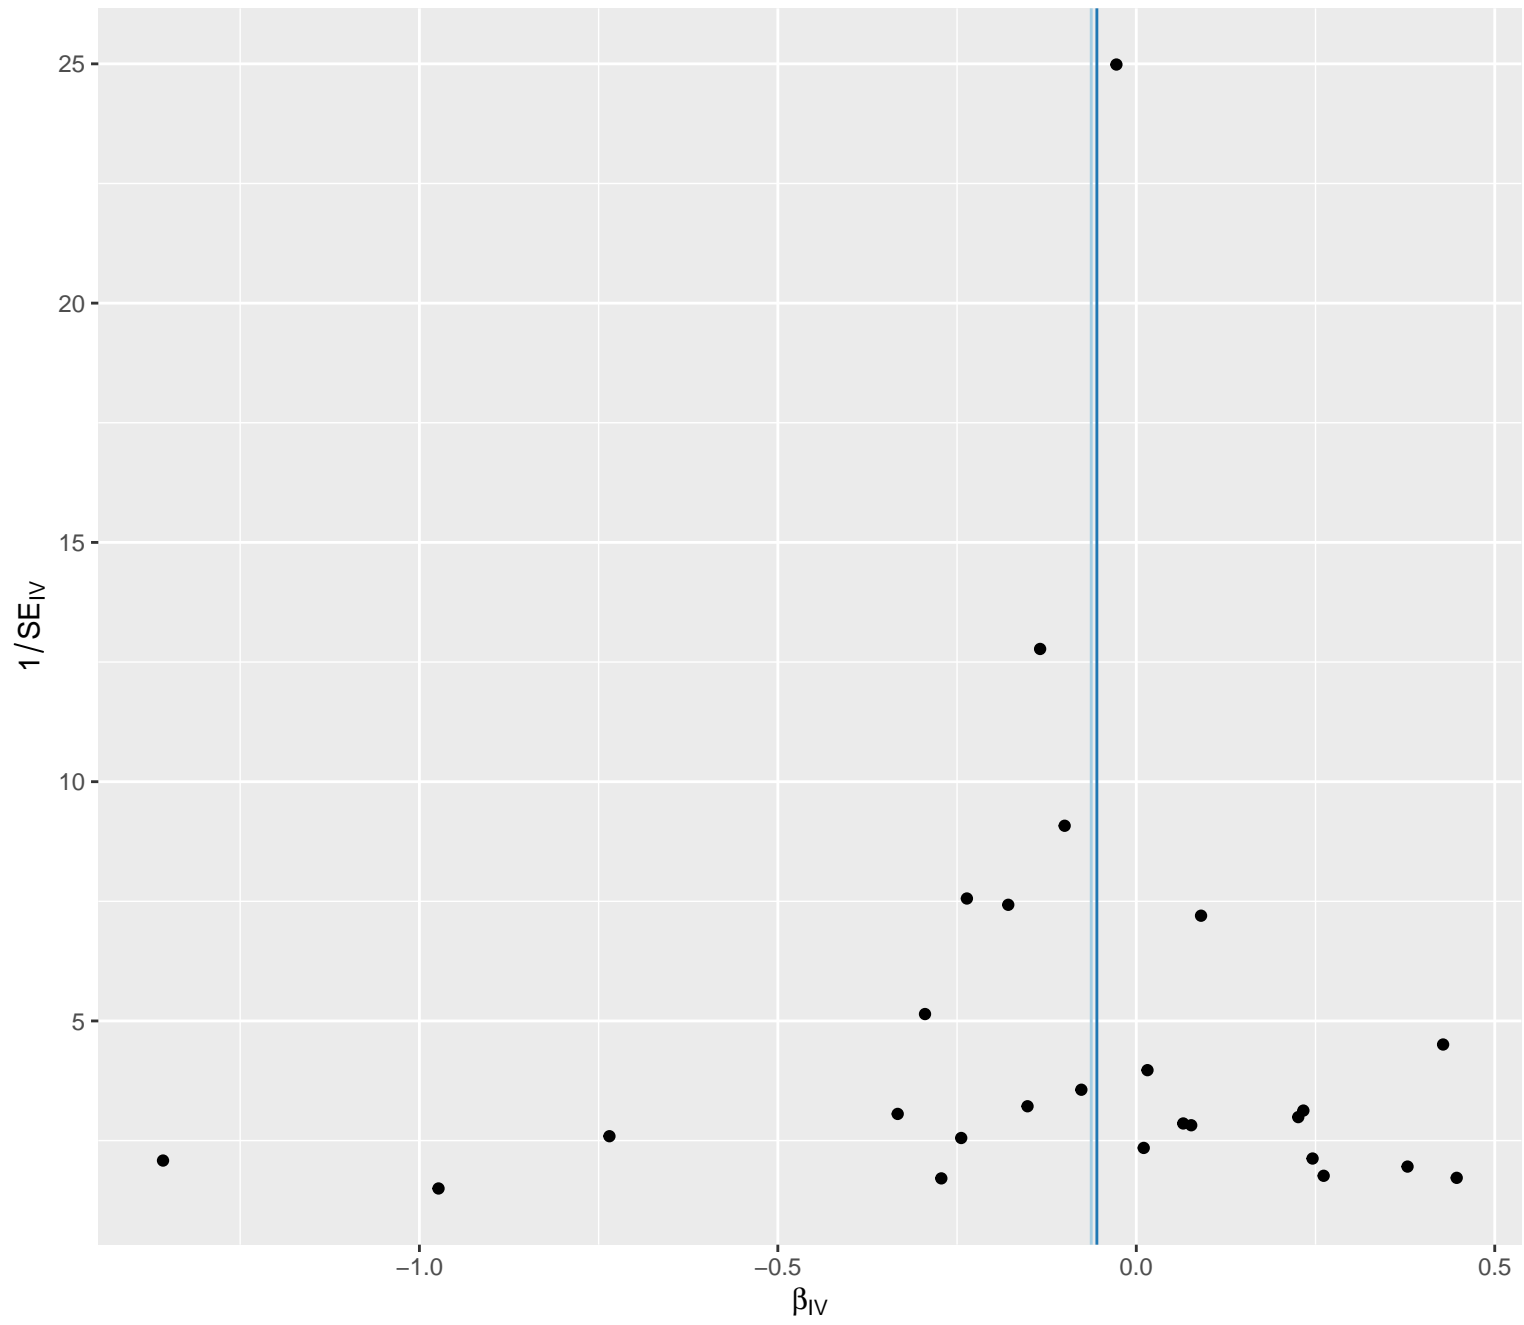

rs149764572

rs149297162

rs71592595

rs62107683

All

-0.2

-0.1

0.0

MR leave-one-out sensitivity analysis for  
' || id:ebi-a-GCST90001563' on 'OSTEONECROSIS'

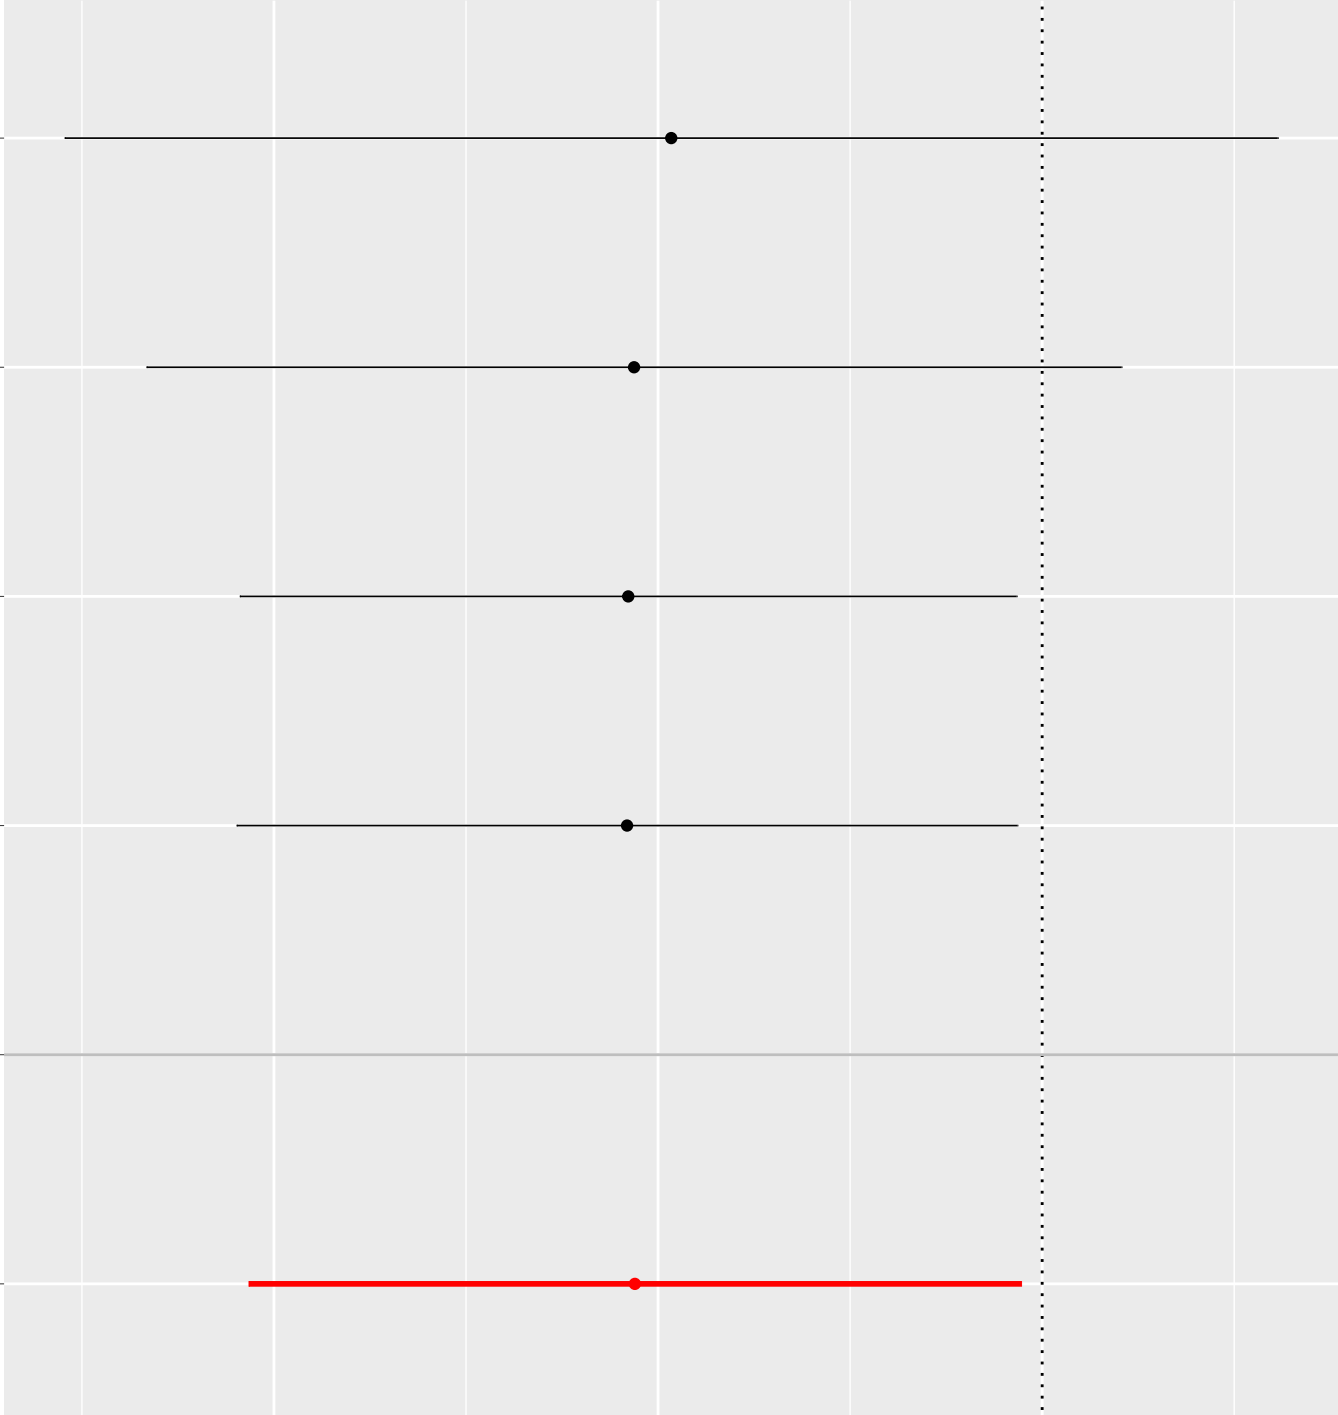



### MR Test

- Inverse variance weighted
- MR Egger
- Simple mode
- Weighted median
- Weighted mode

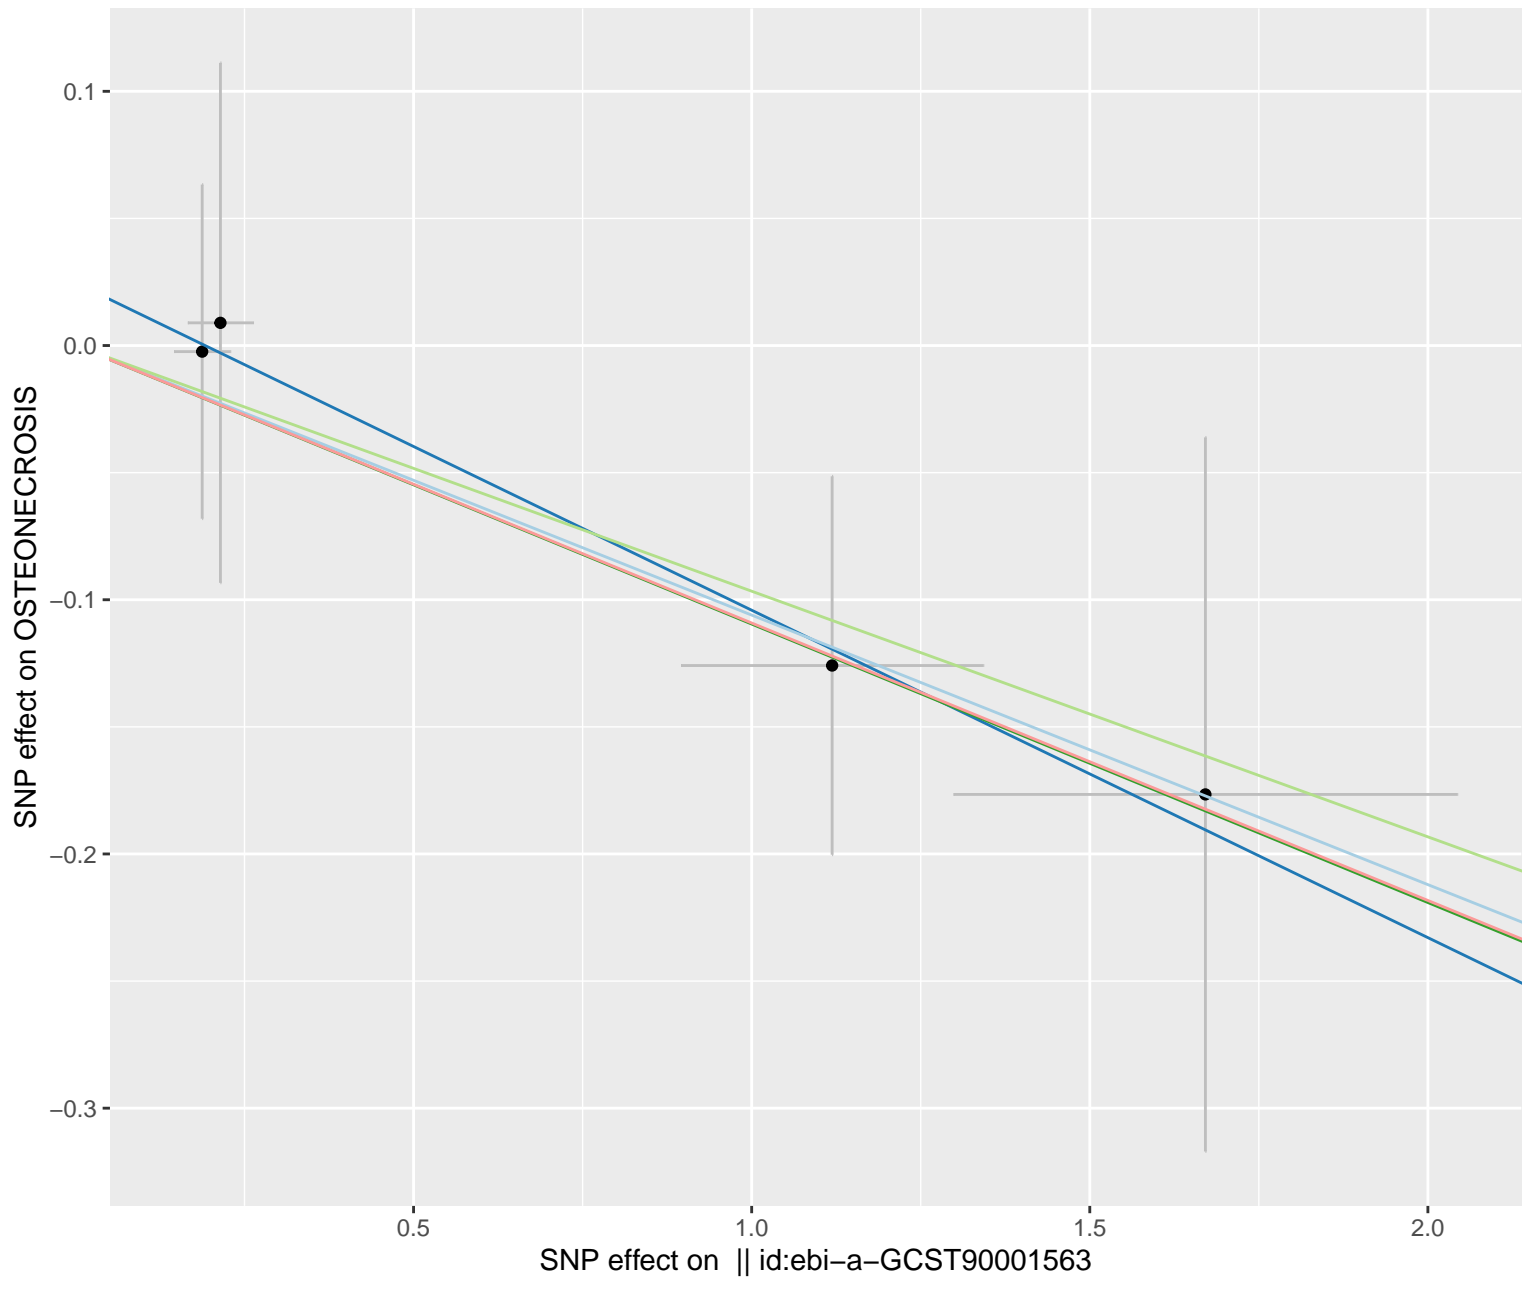

MR Method

- Inverse variance weighted
- MR Egger

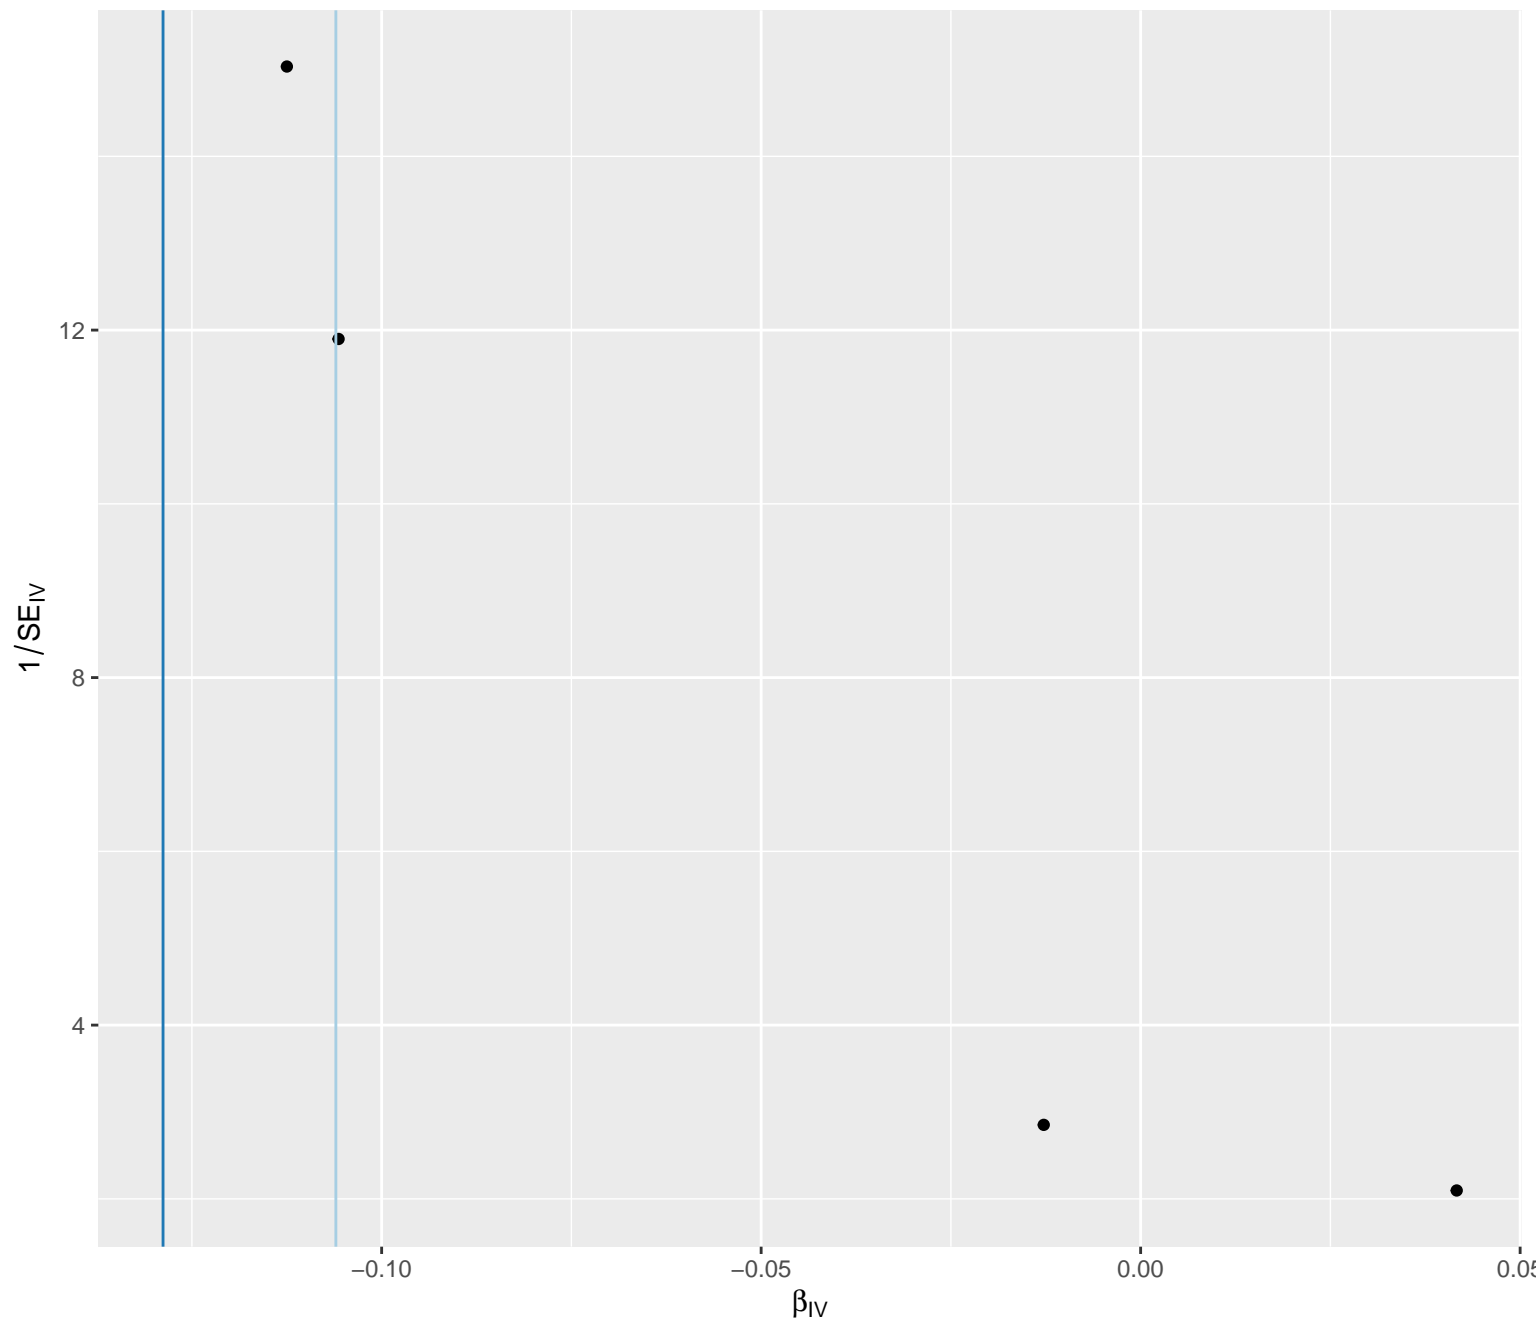

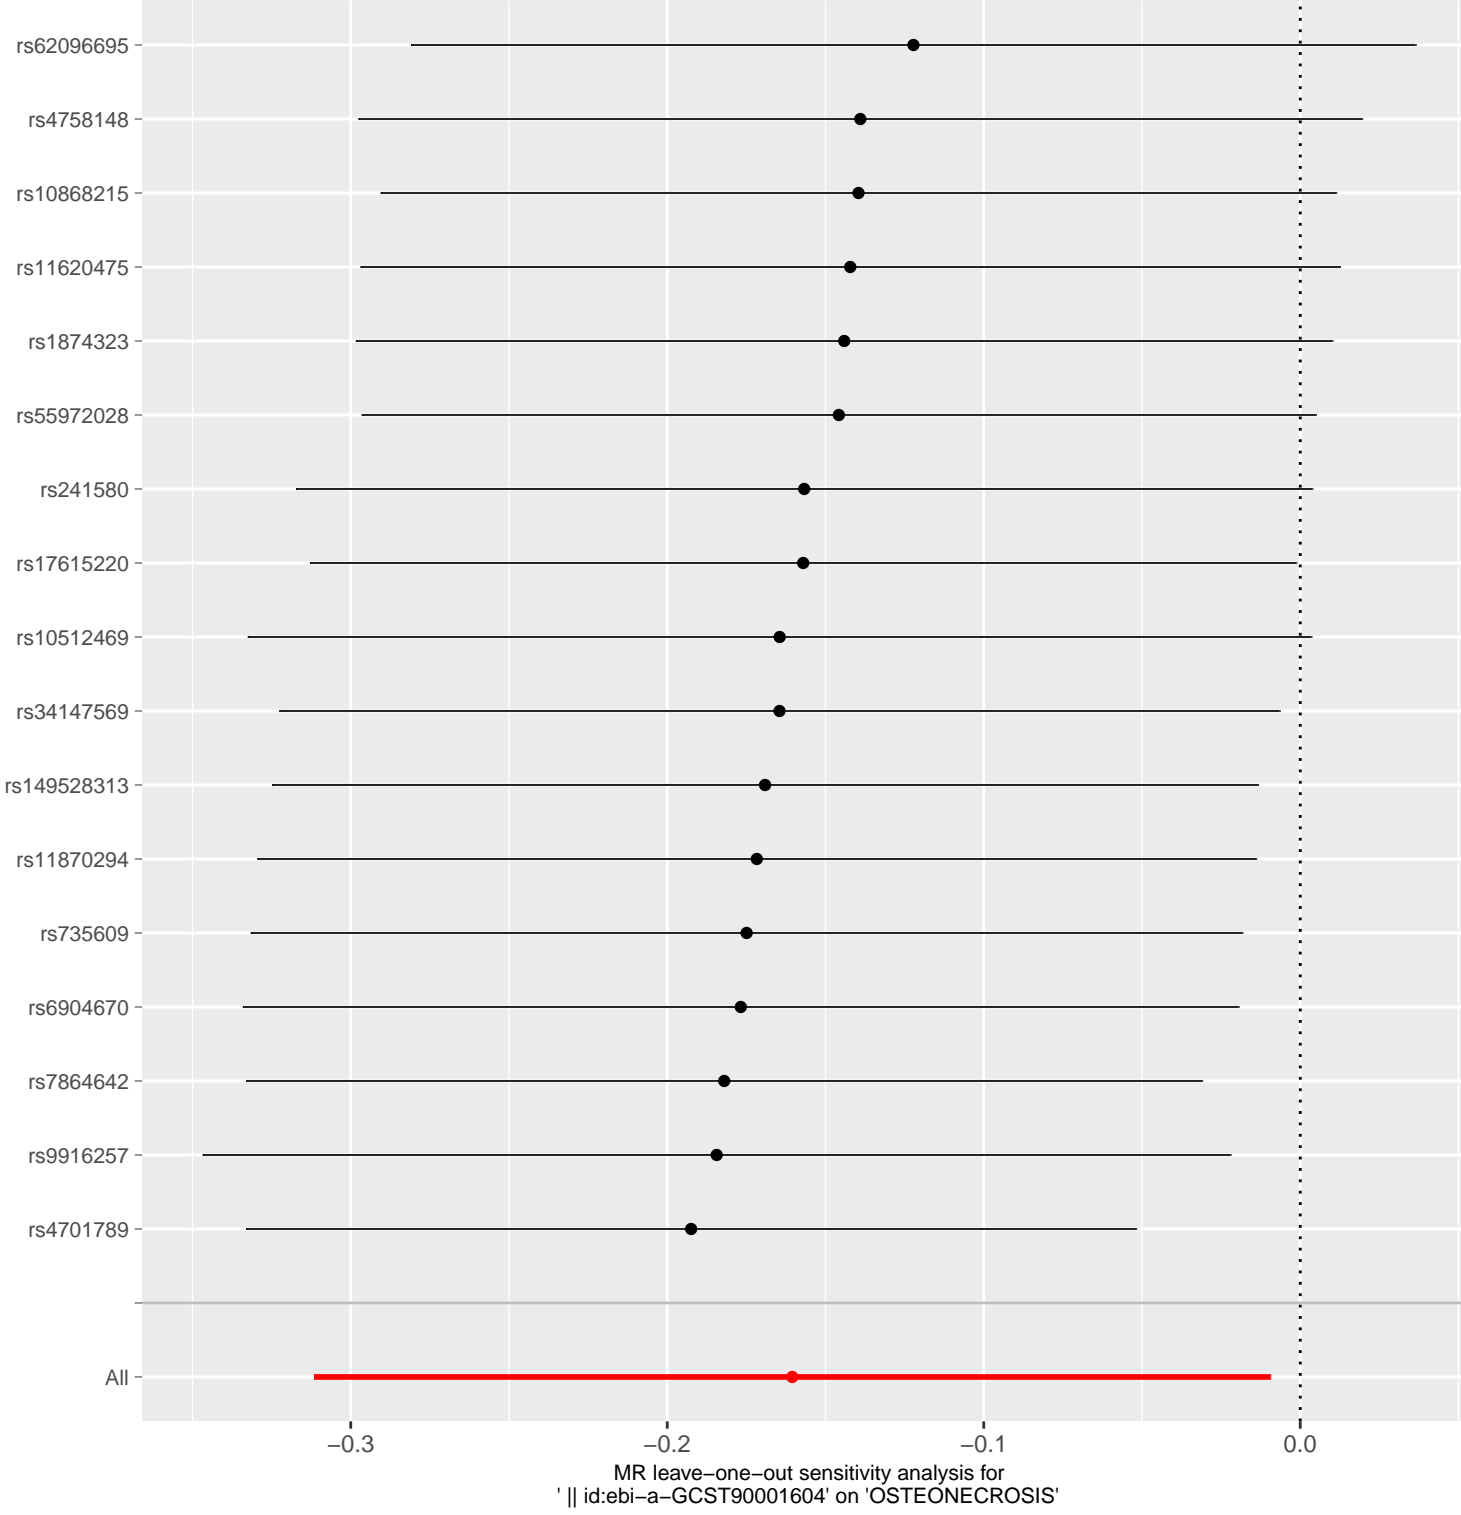

### MR Test

- Inverse variance weighted
- MR Egger
- Simple mode
- Weighted median
- Weighted mode

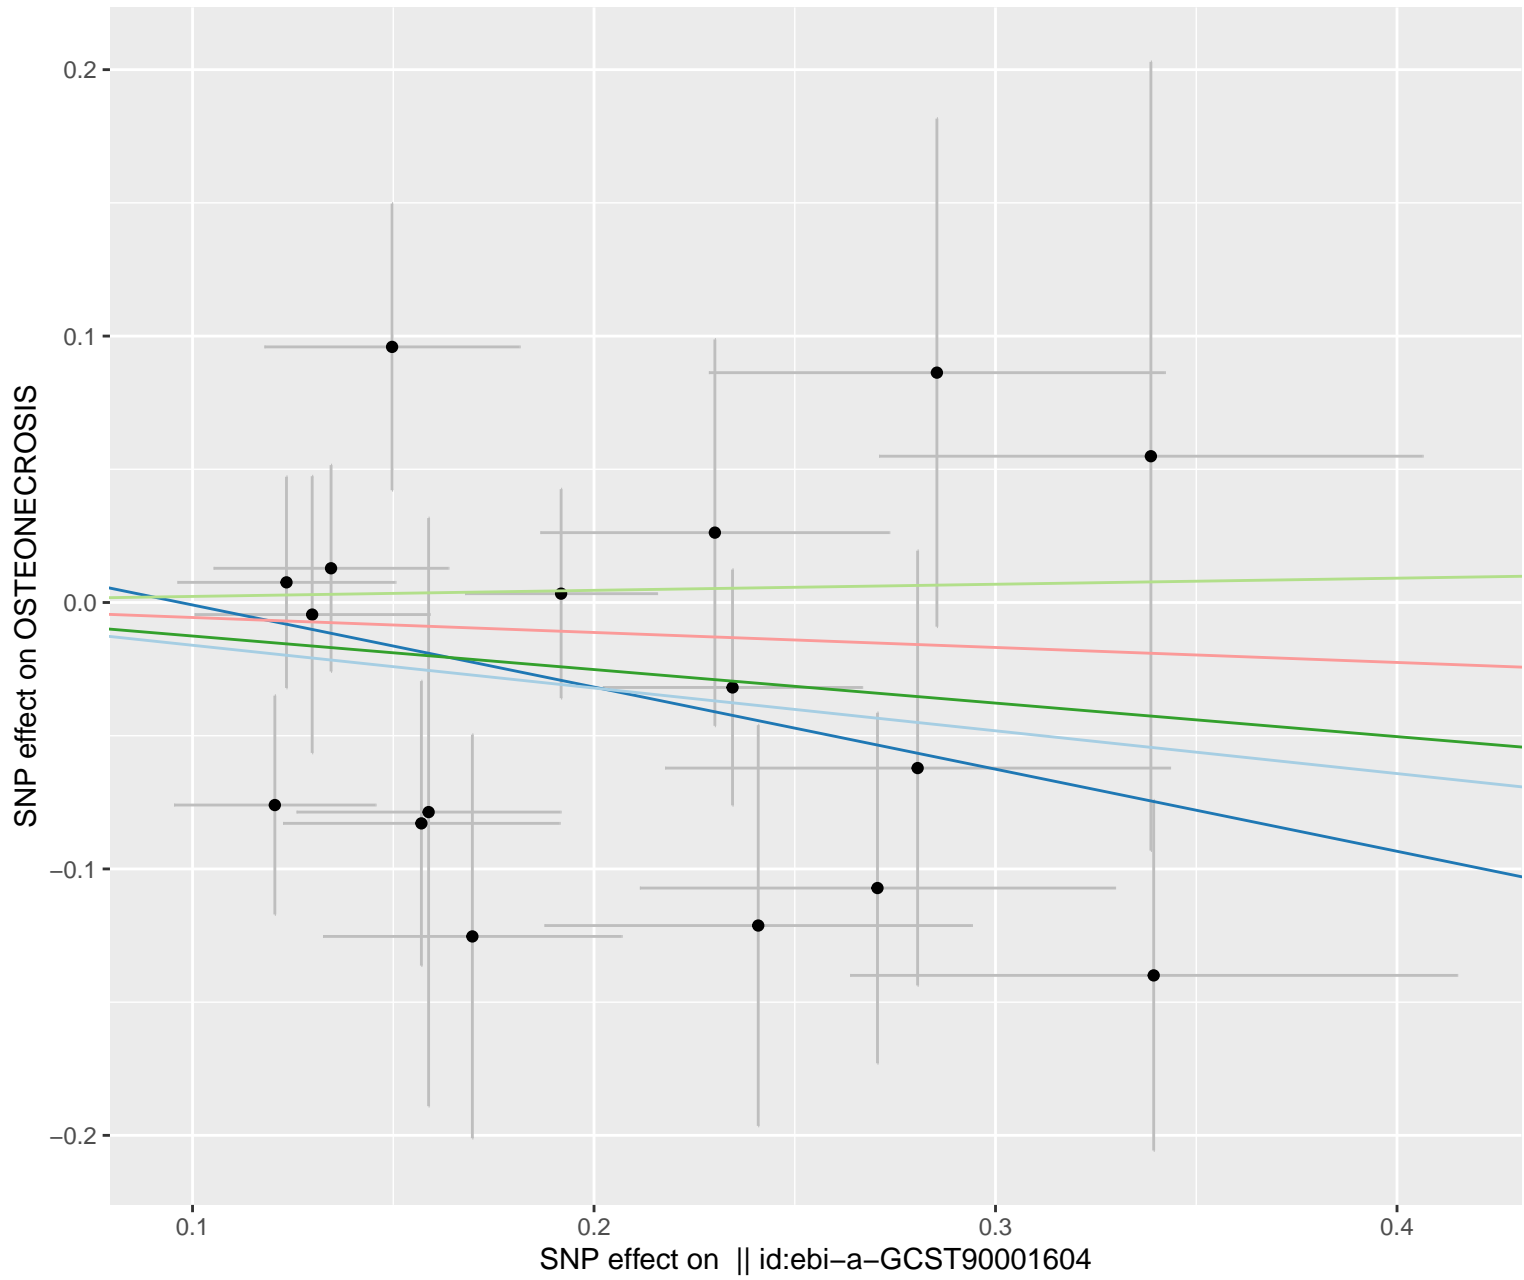

### MR Method

- Inverse variance weighted
- MR Egger

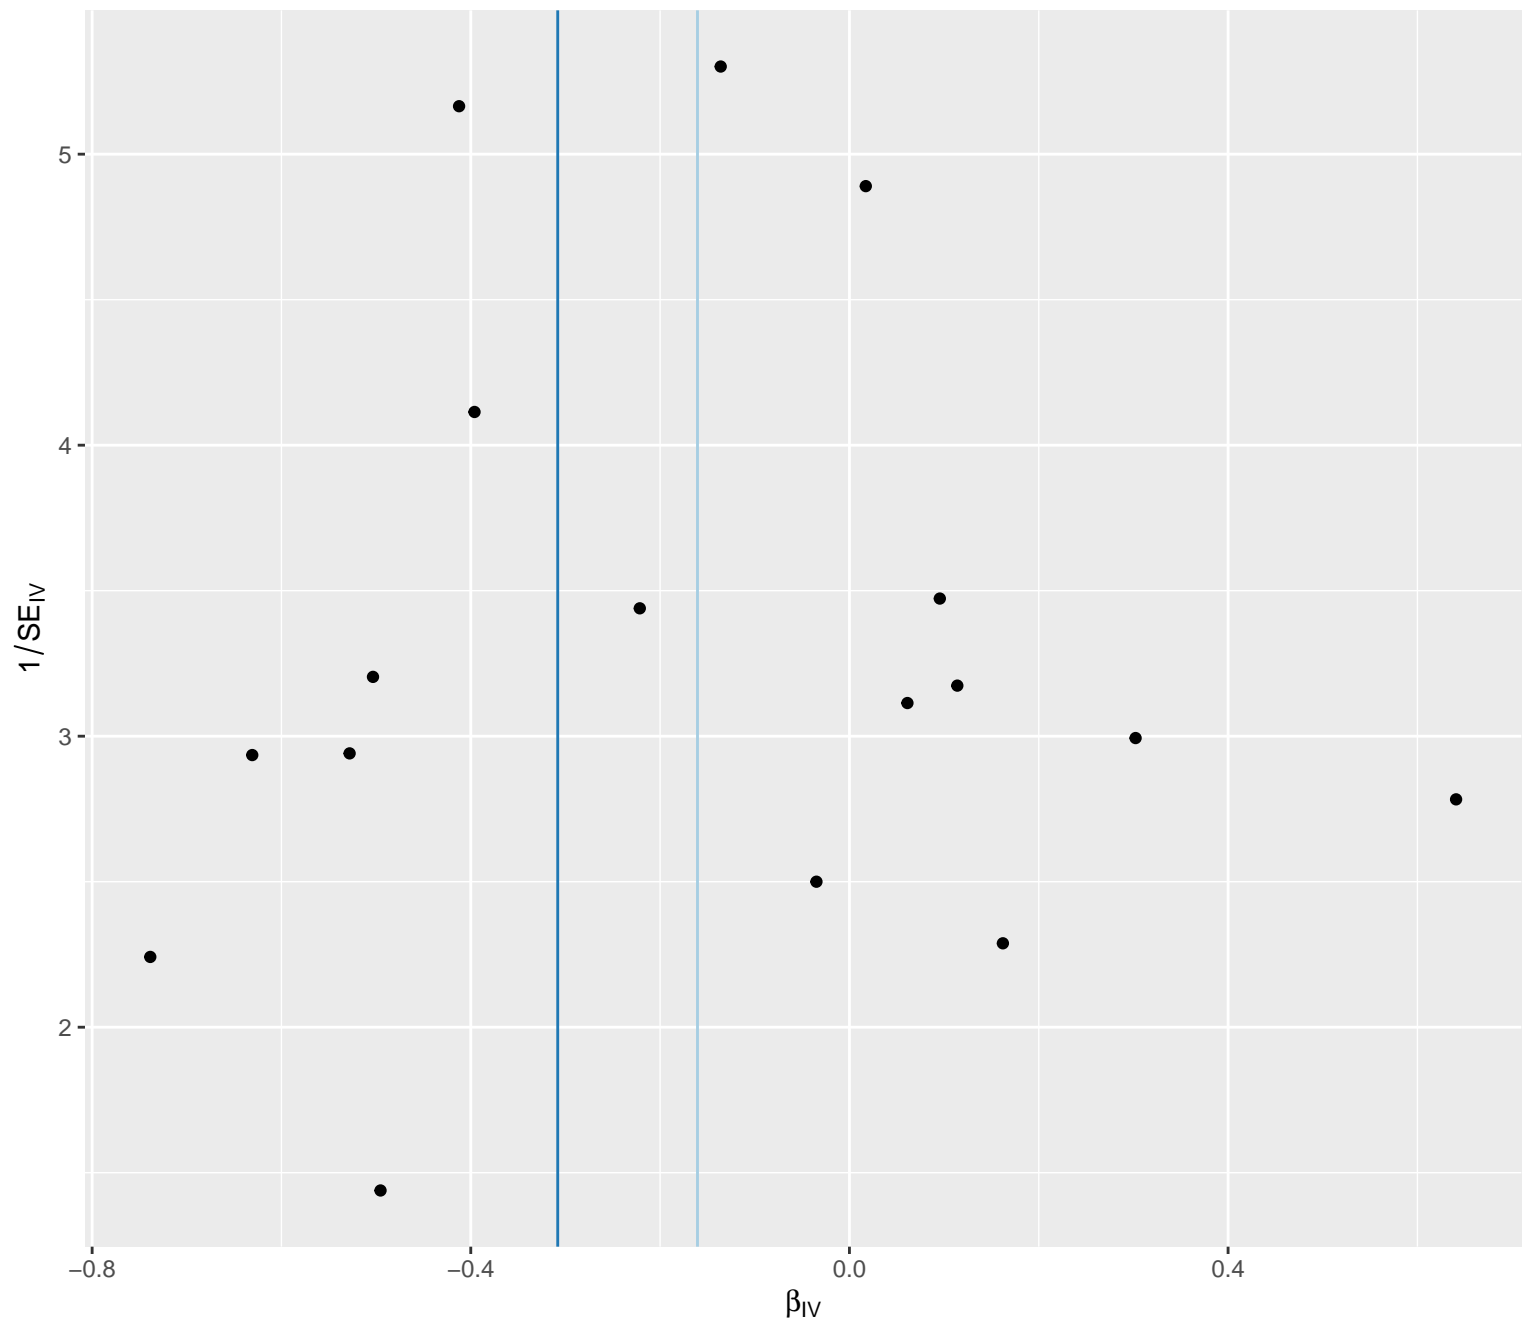

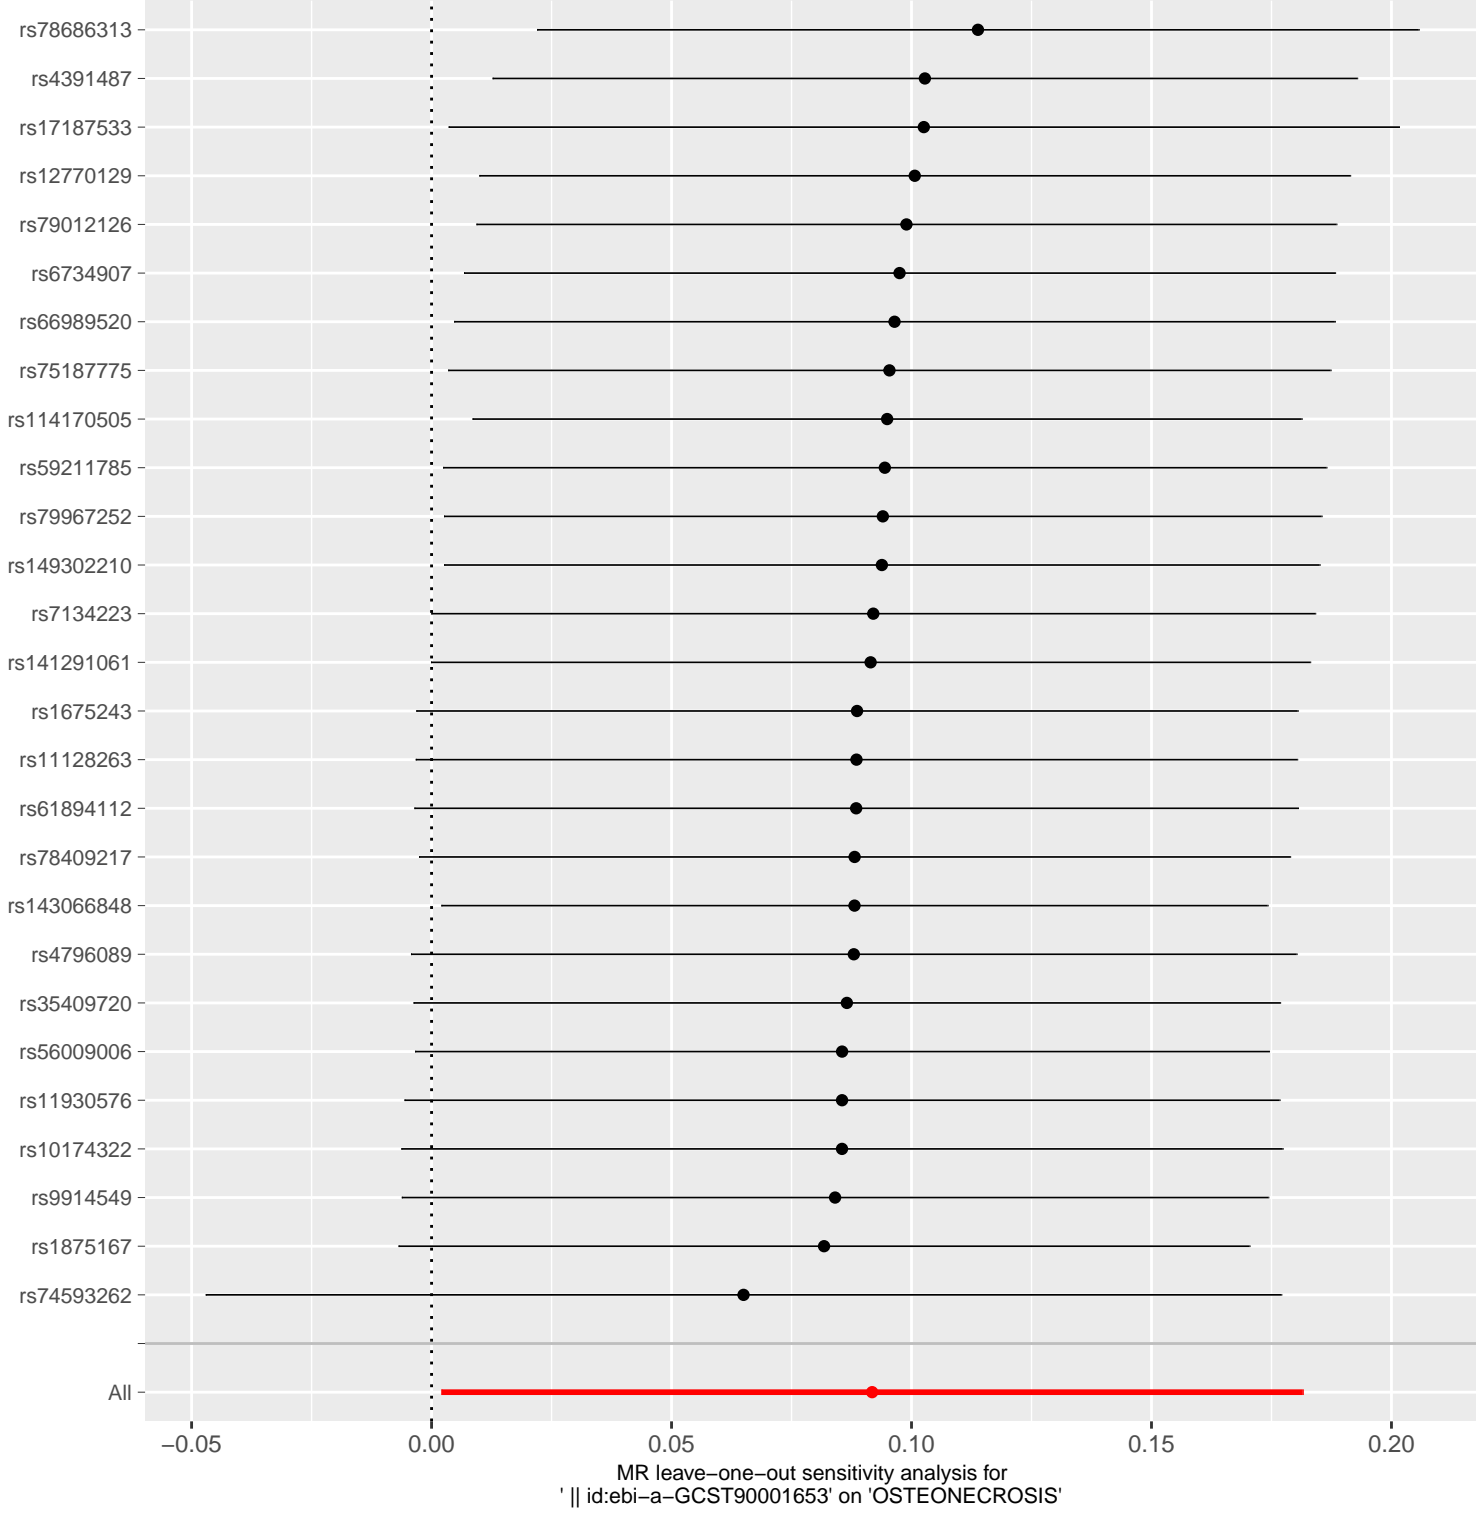

MR Test

- Inverse variance weighted
- MR Egger
- Simple mode
- Weighted median
- Weighted mode

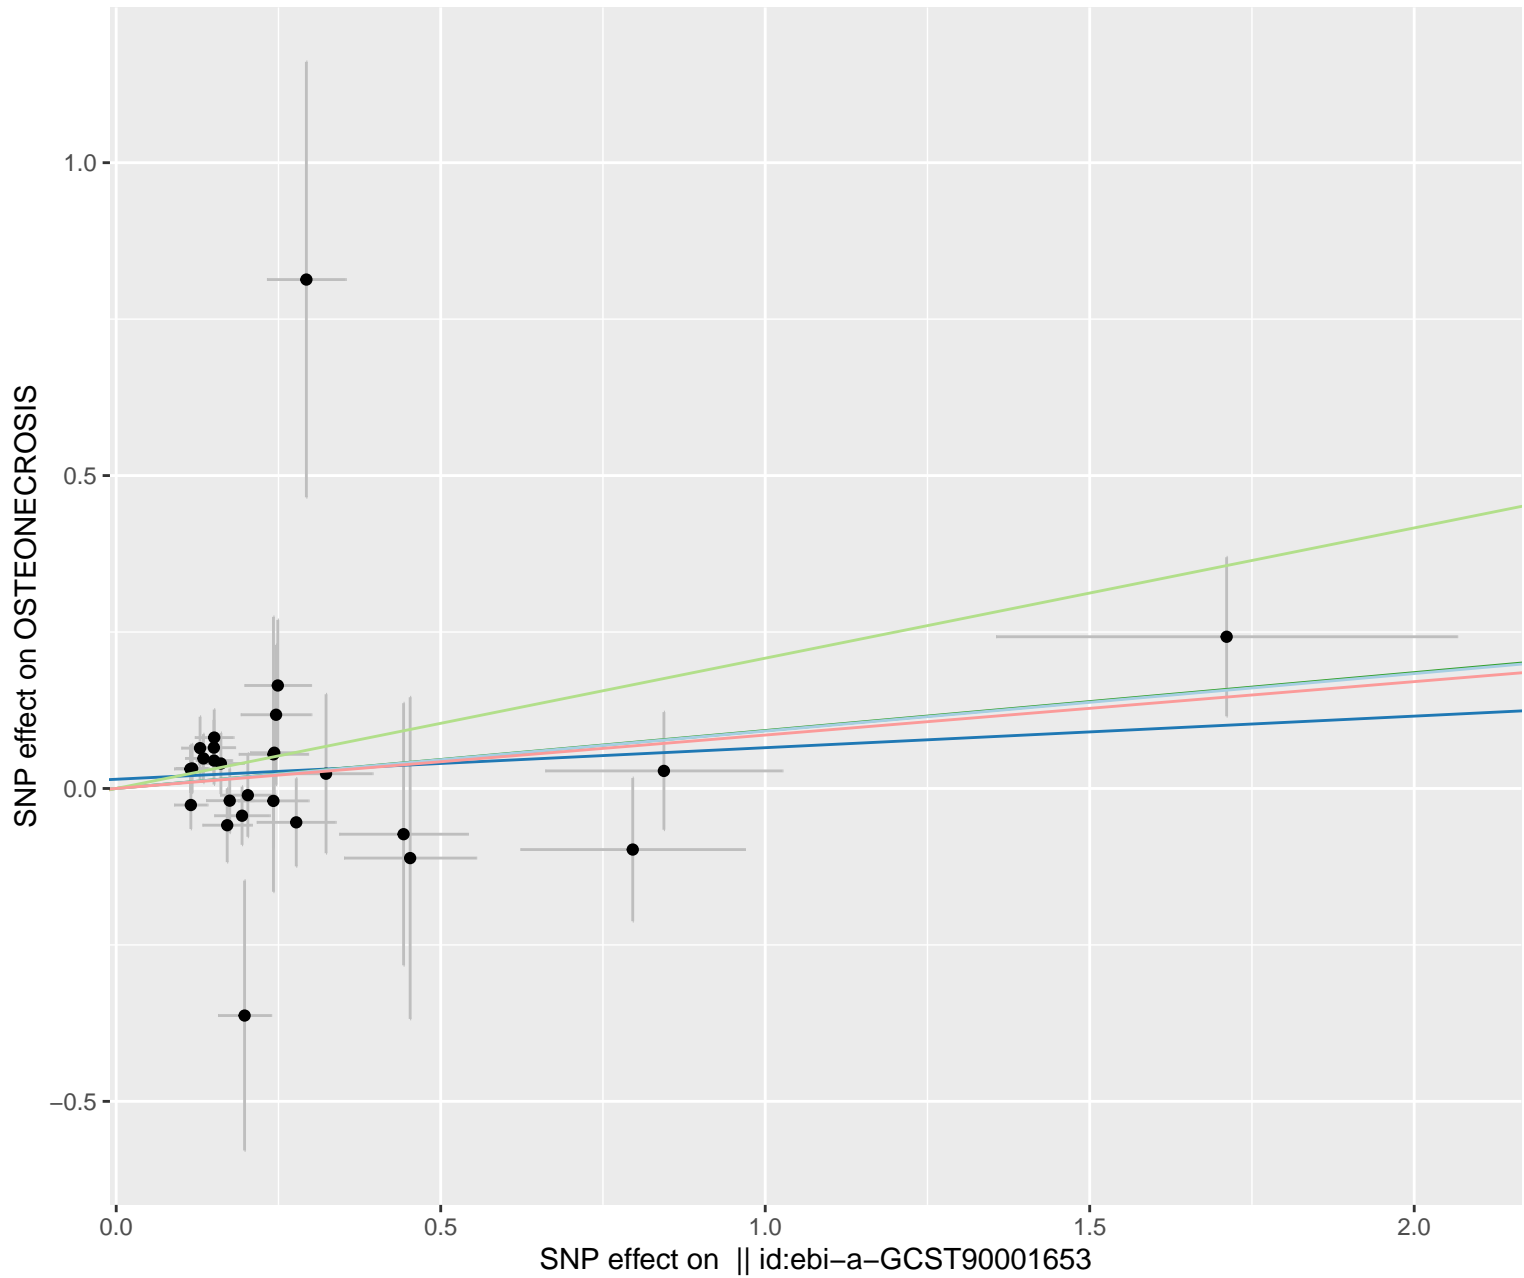

### MR Method

- Inverse variance weighted
- MR Egger

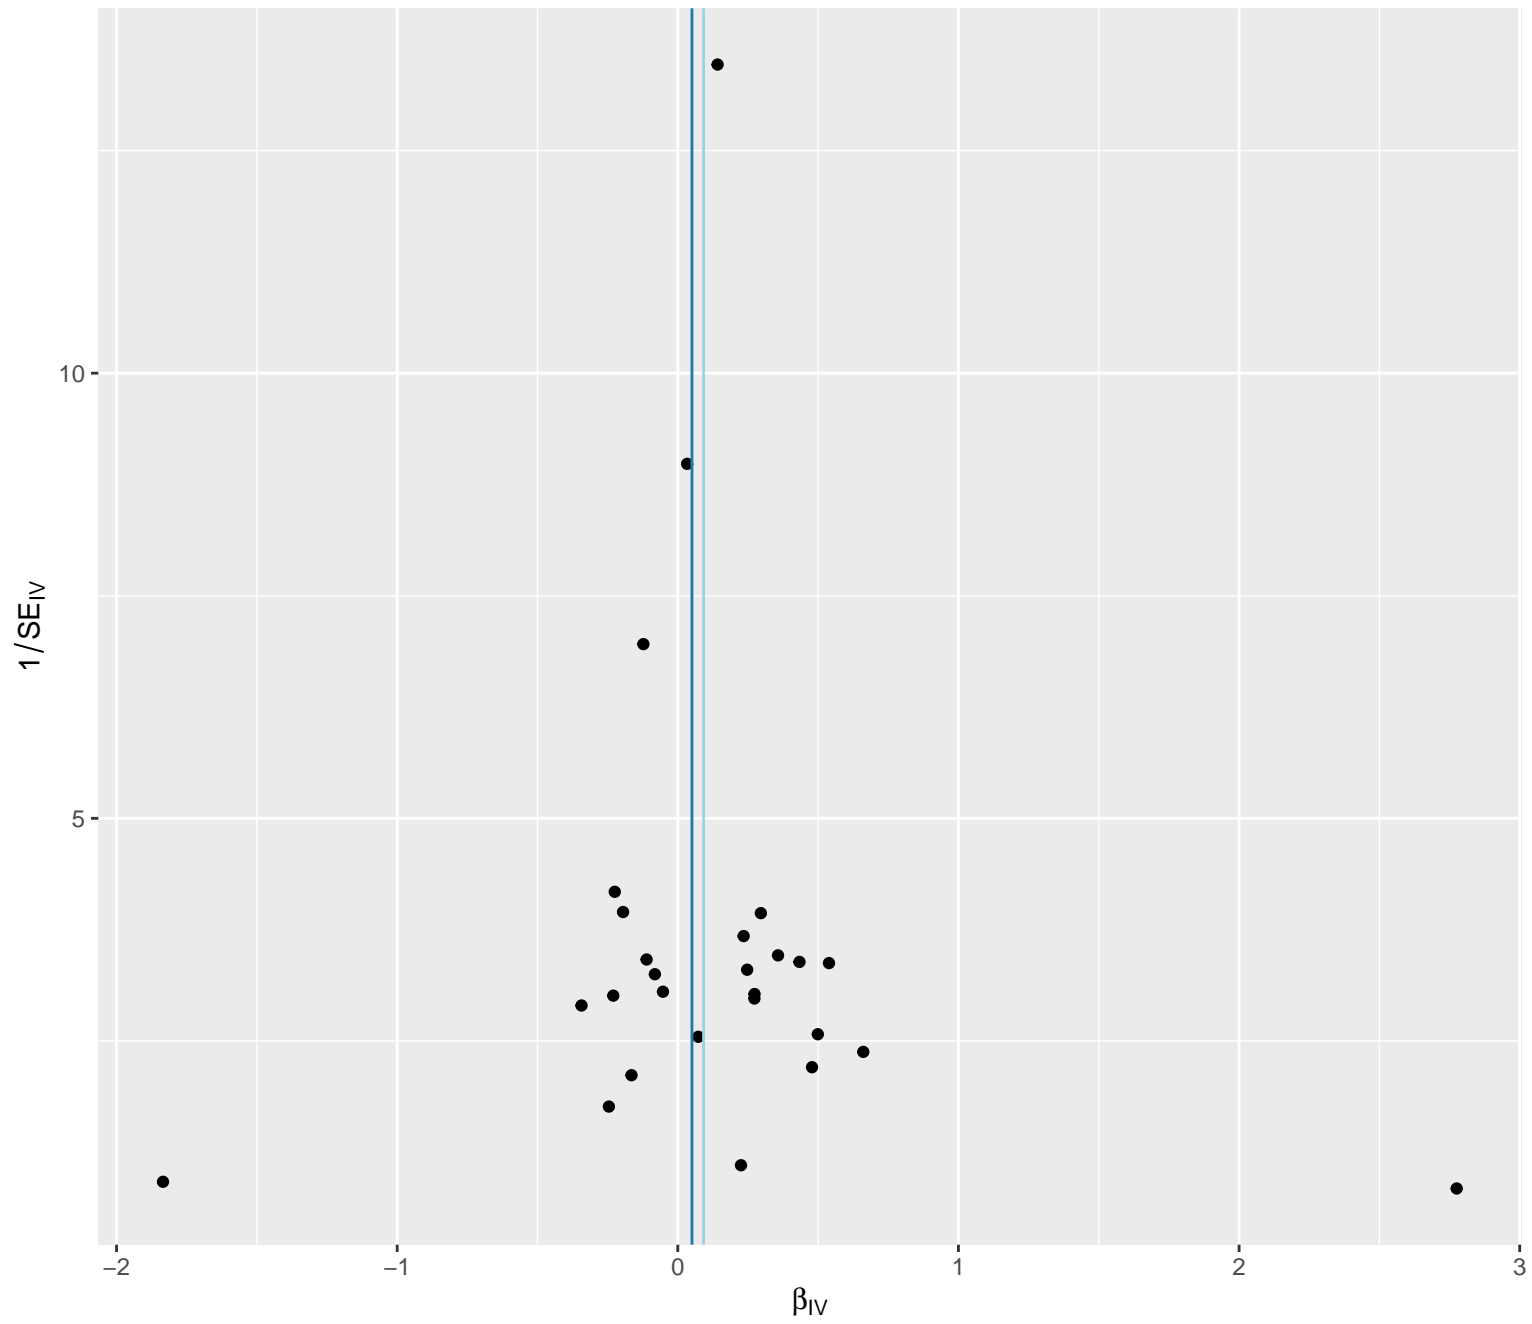



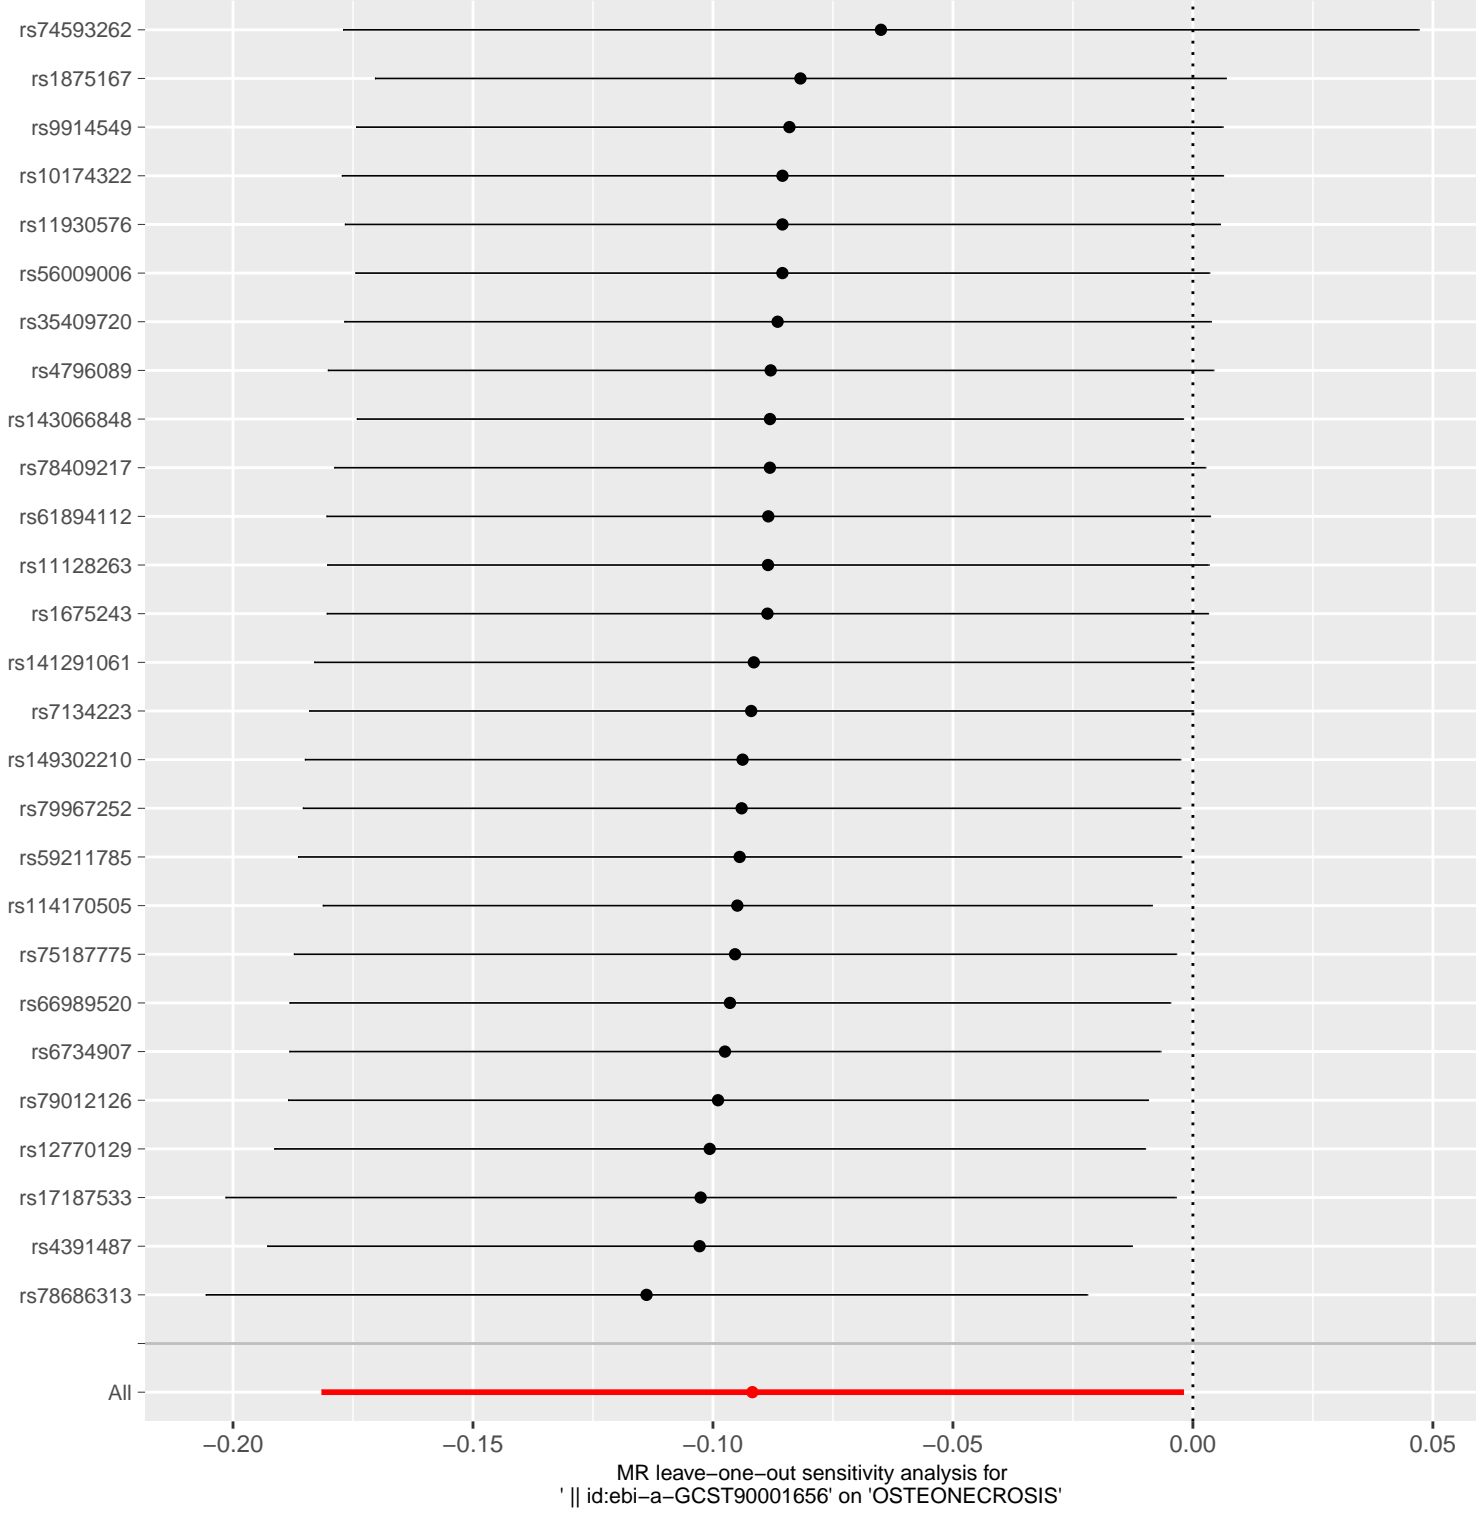

MR Test

- Inverse variance weighted
- MR Egger
- Simple mode
- Weighted median
- Weighted mode

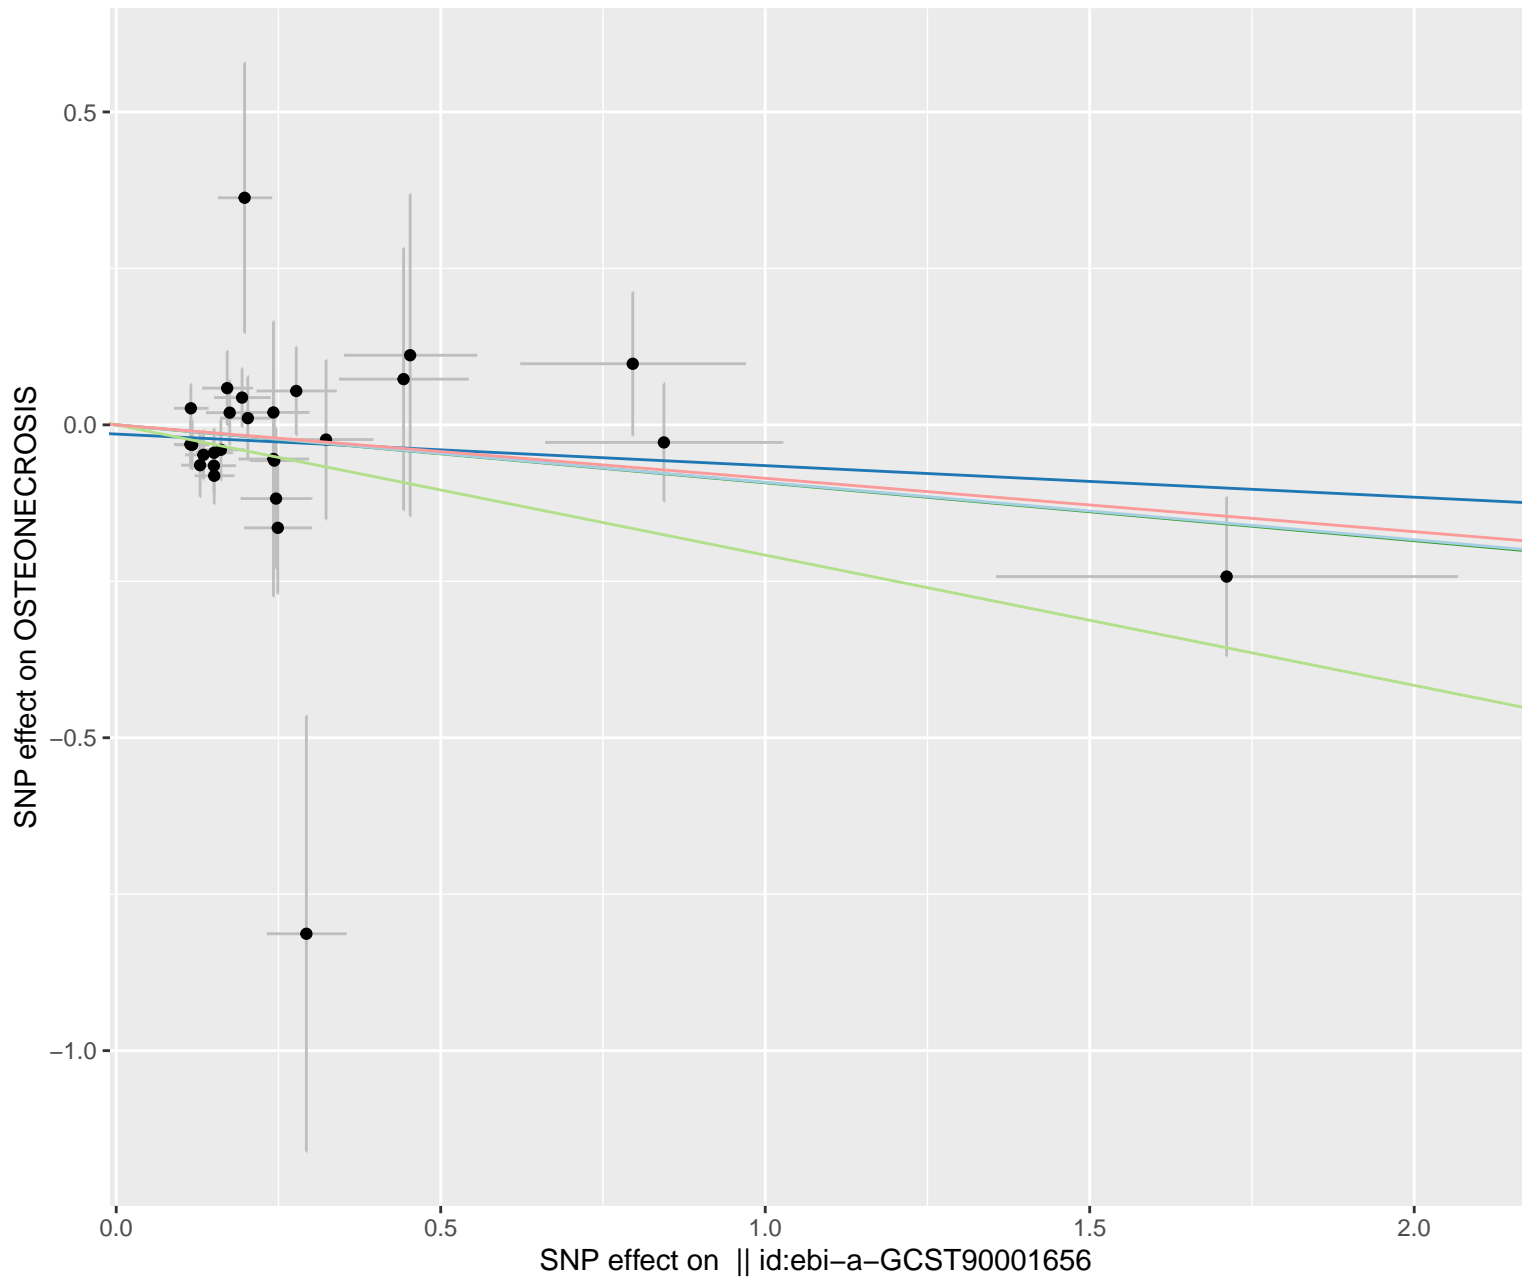

MR Method

- Inverse variance weighted
- MR Egger

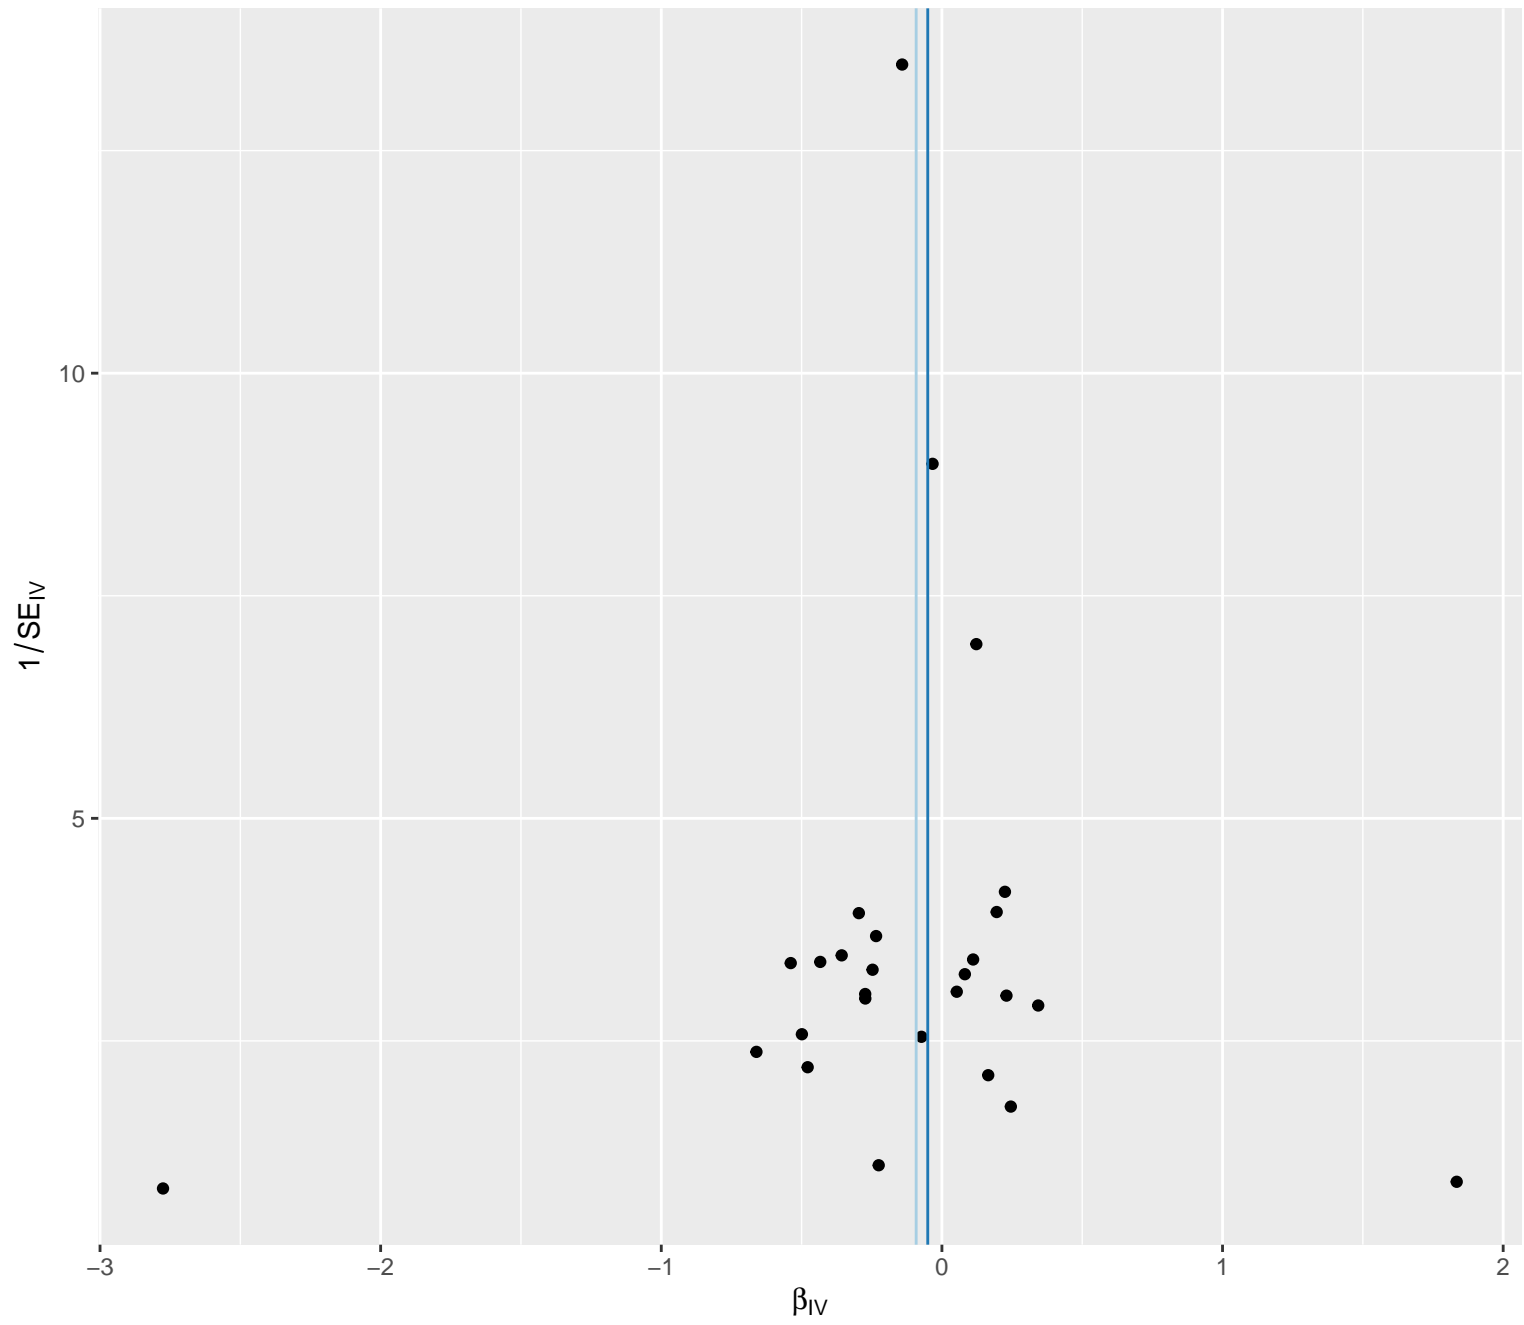

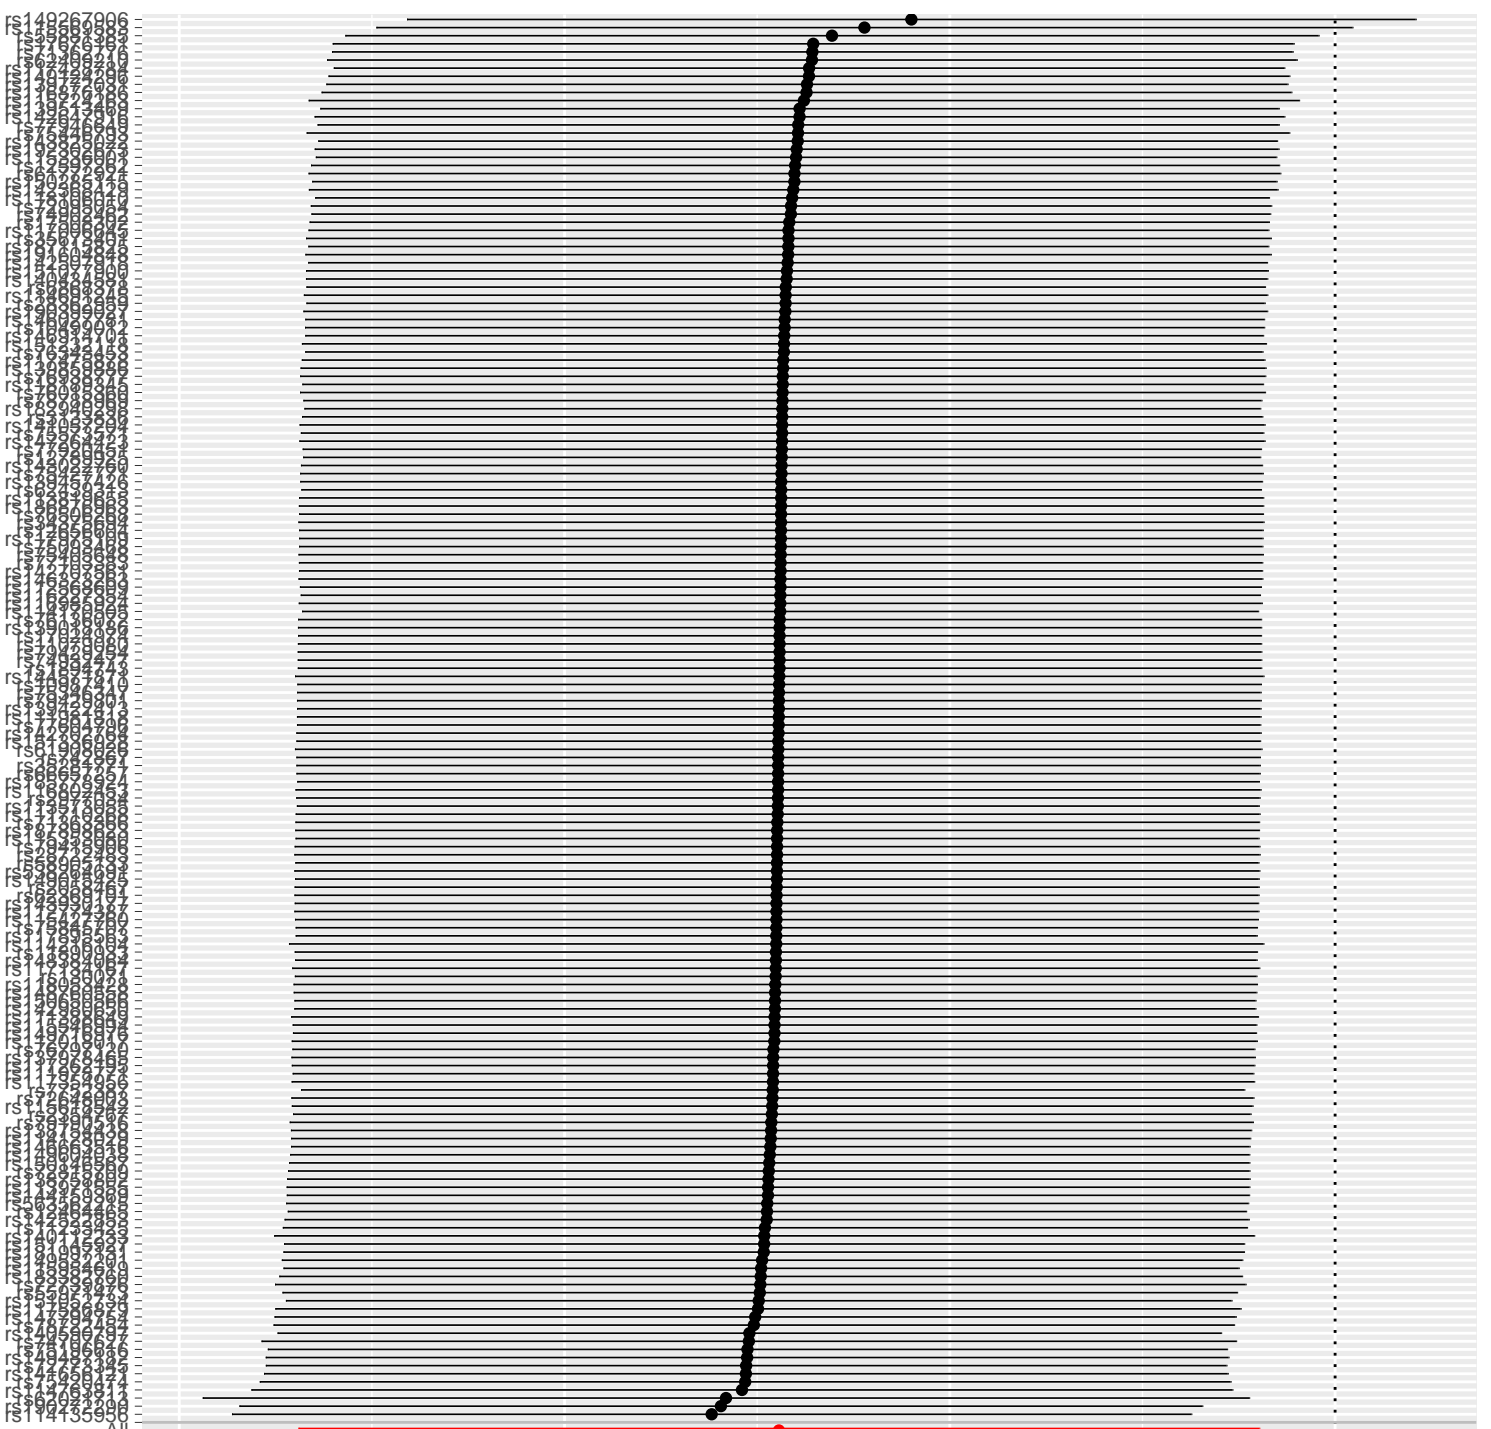

-0.003

-0.002

-0.001

0.000

MR leave-one-out sensitivity analysis for  
'id:ebi-a-GCST90001697' on 'OSTEONECROSIS'

MR Test

- Inverse variance weighted
- MR Egger
- Simple mode
- Weighted median
- Weighted mode

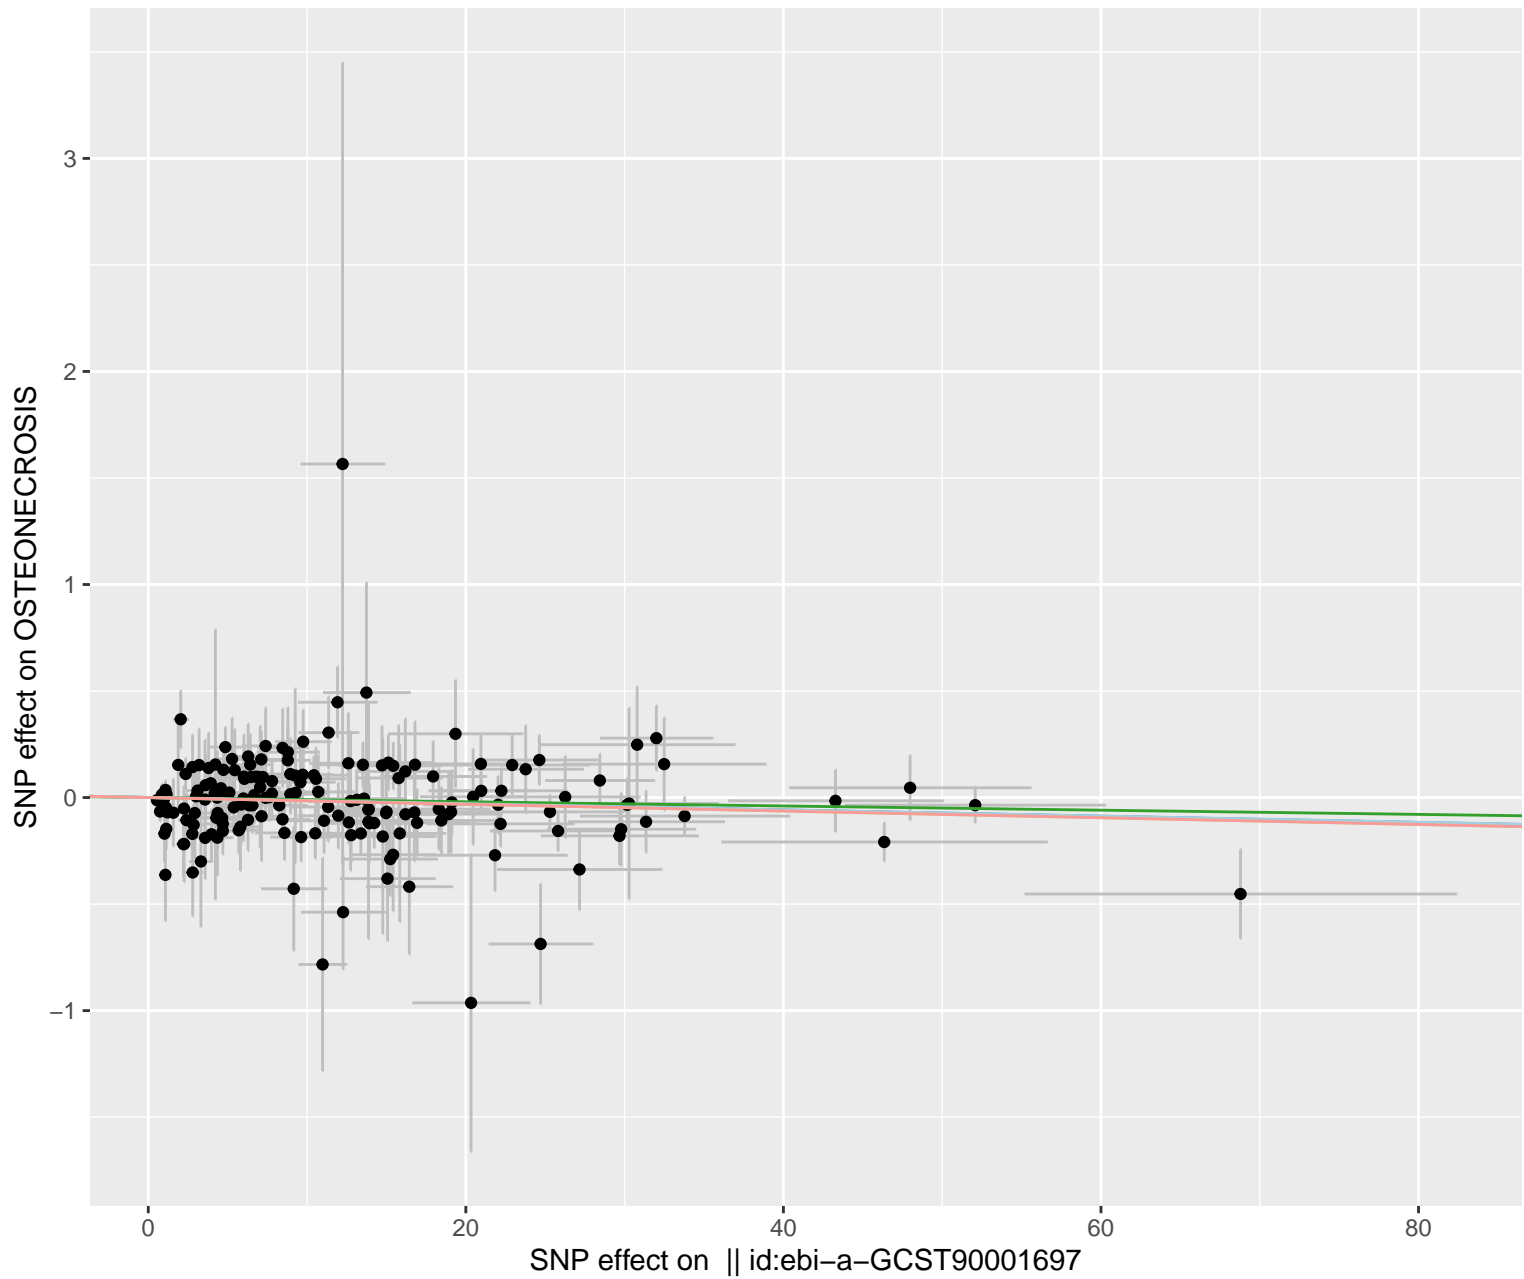

MR Method

- Inverse variance weighted
- MR Egger

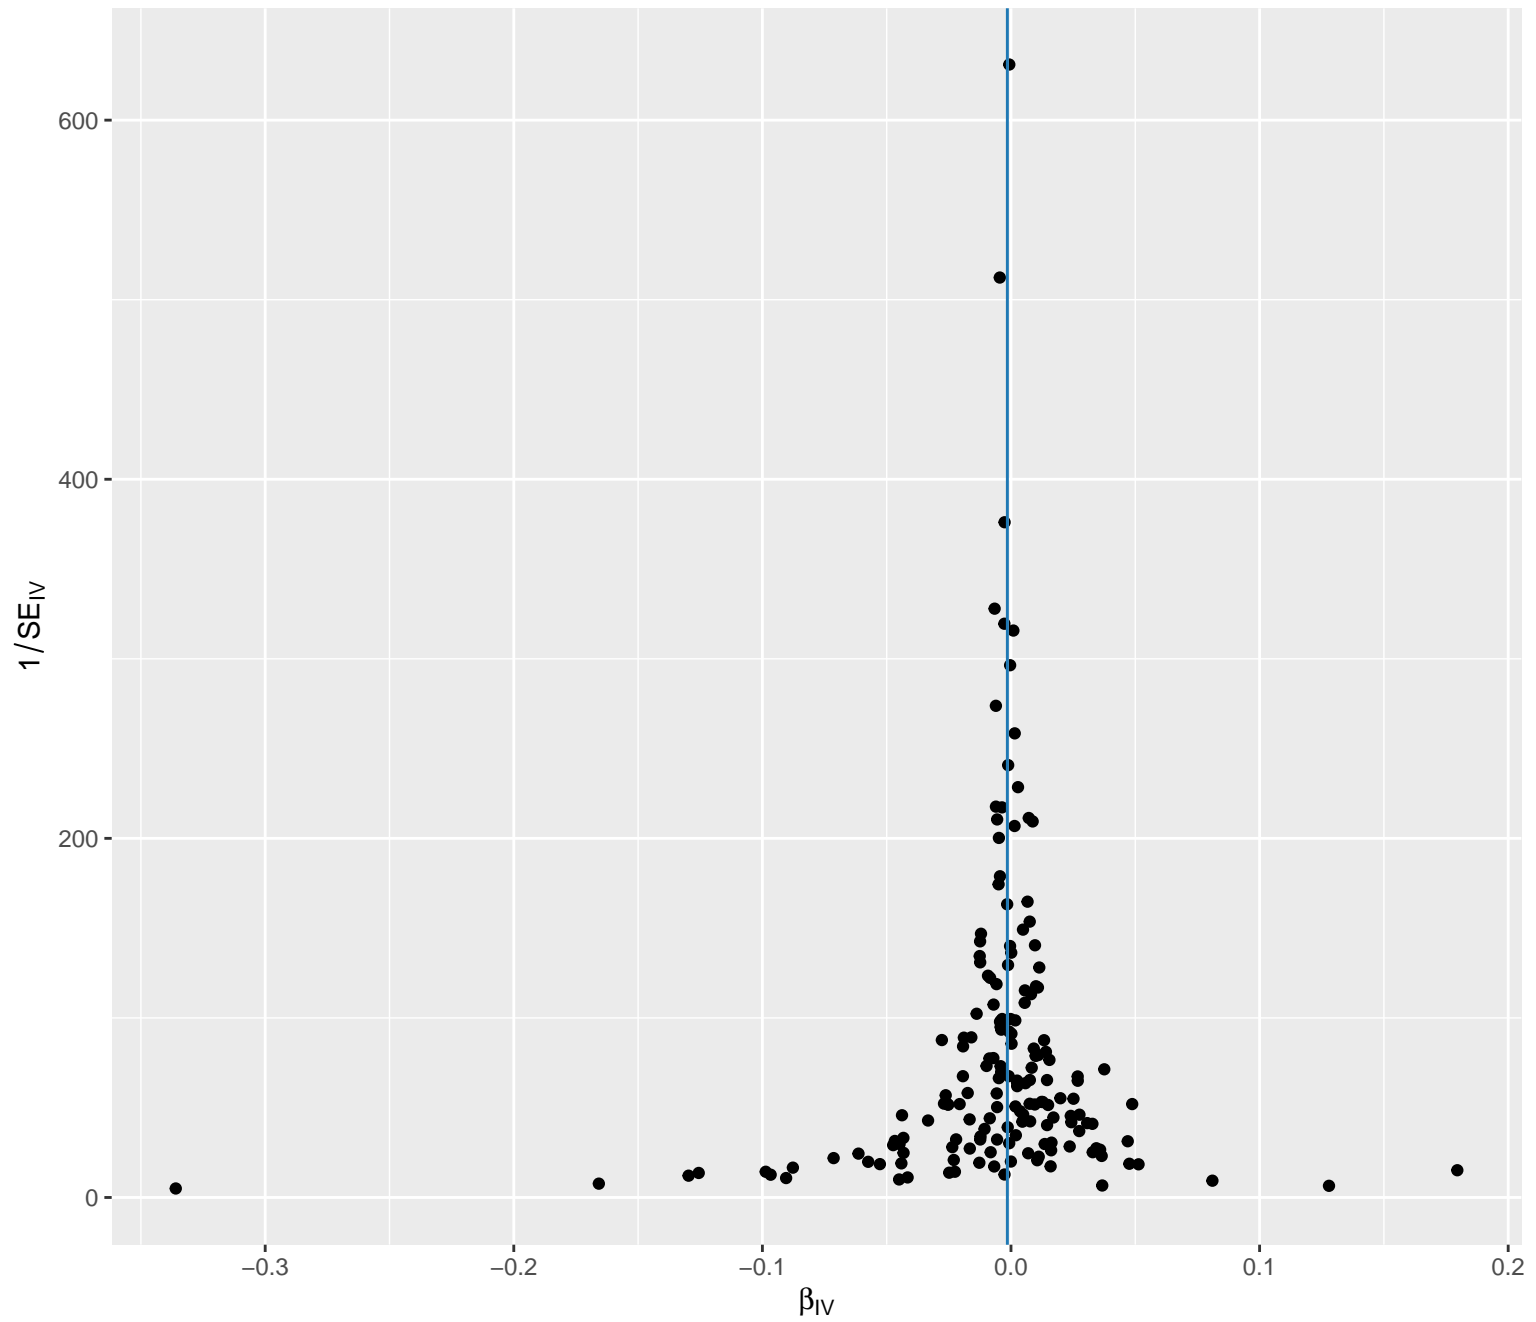

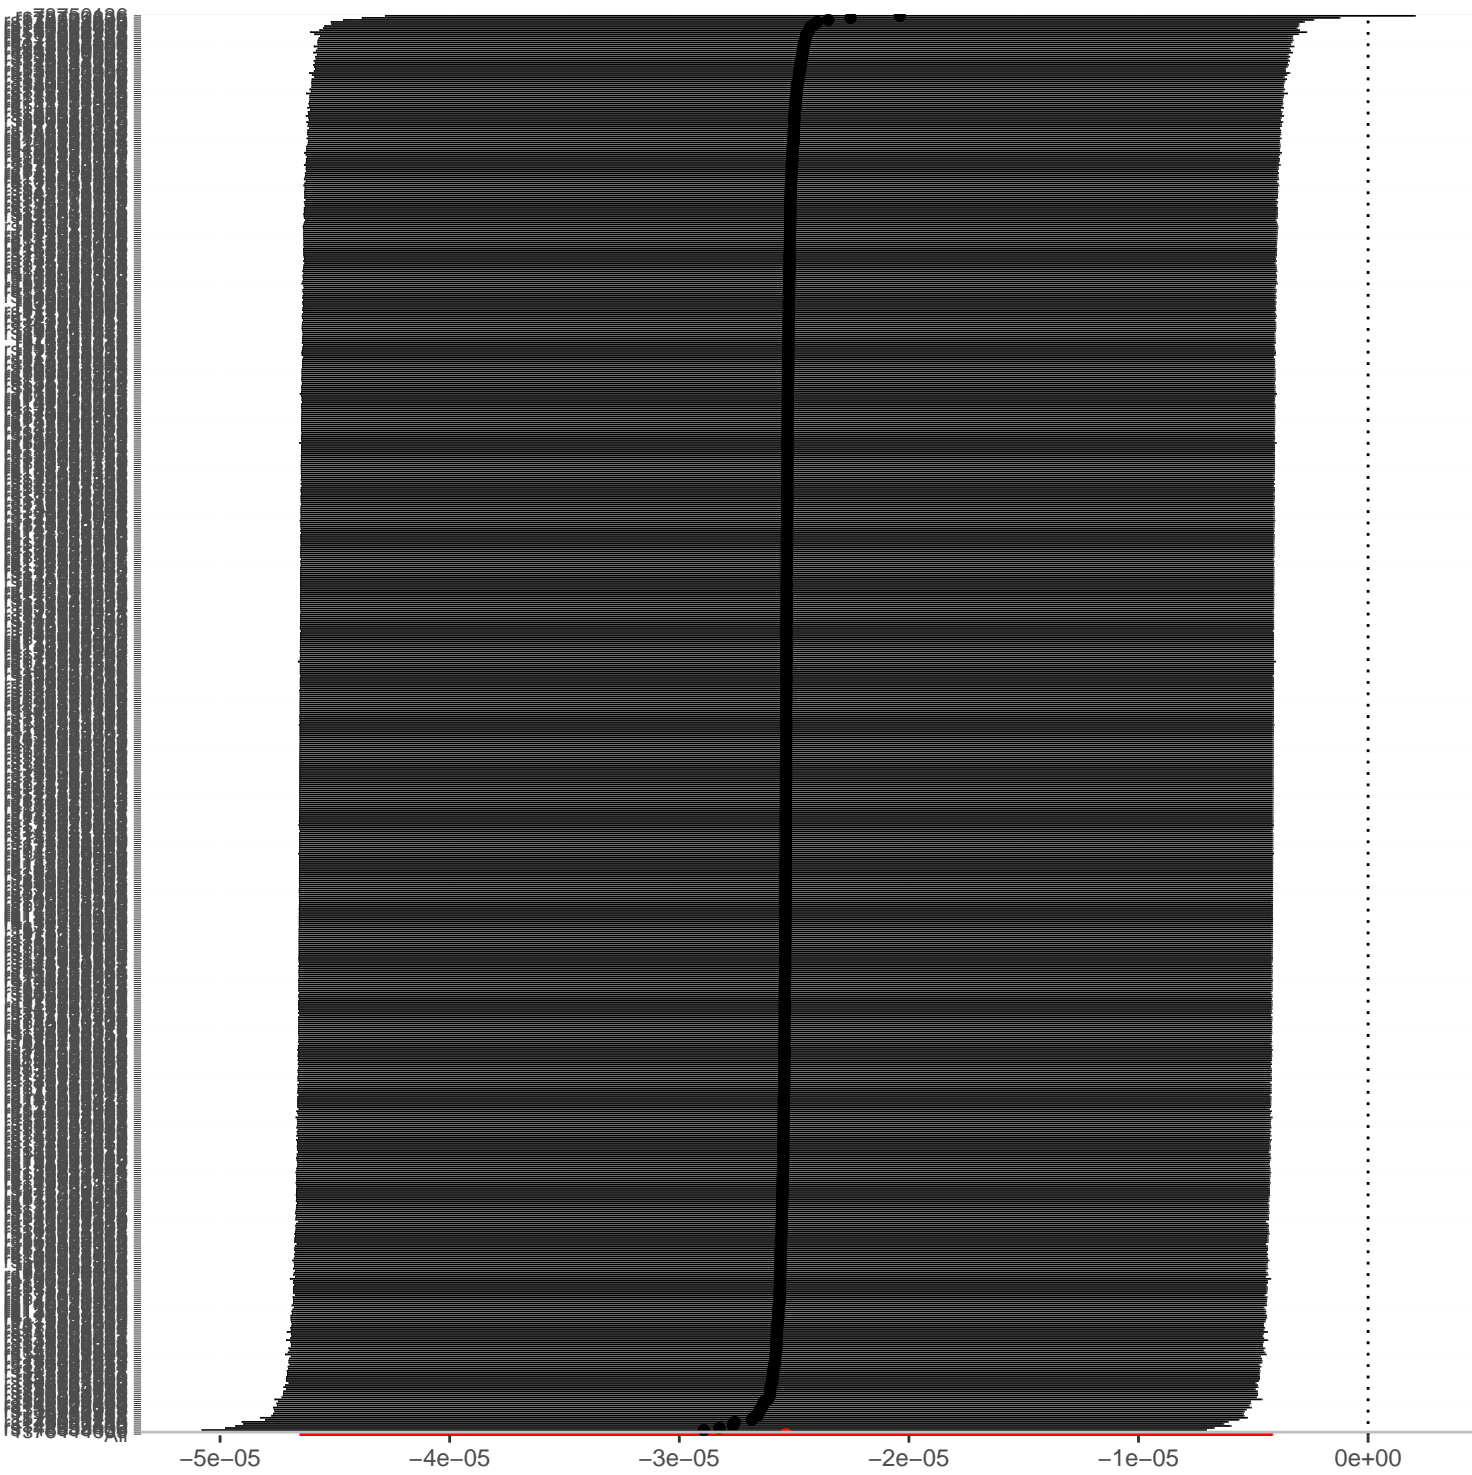

MR leave-one-out sensitivity analysis for  
' || id:ebi-a-GCST90001698' on 'OSTEONECROSIS'

MR Test

- Inverse variance weighted
- MR Egger
- Simple mode
- Weighted median
- Weighted mode

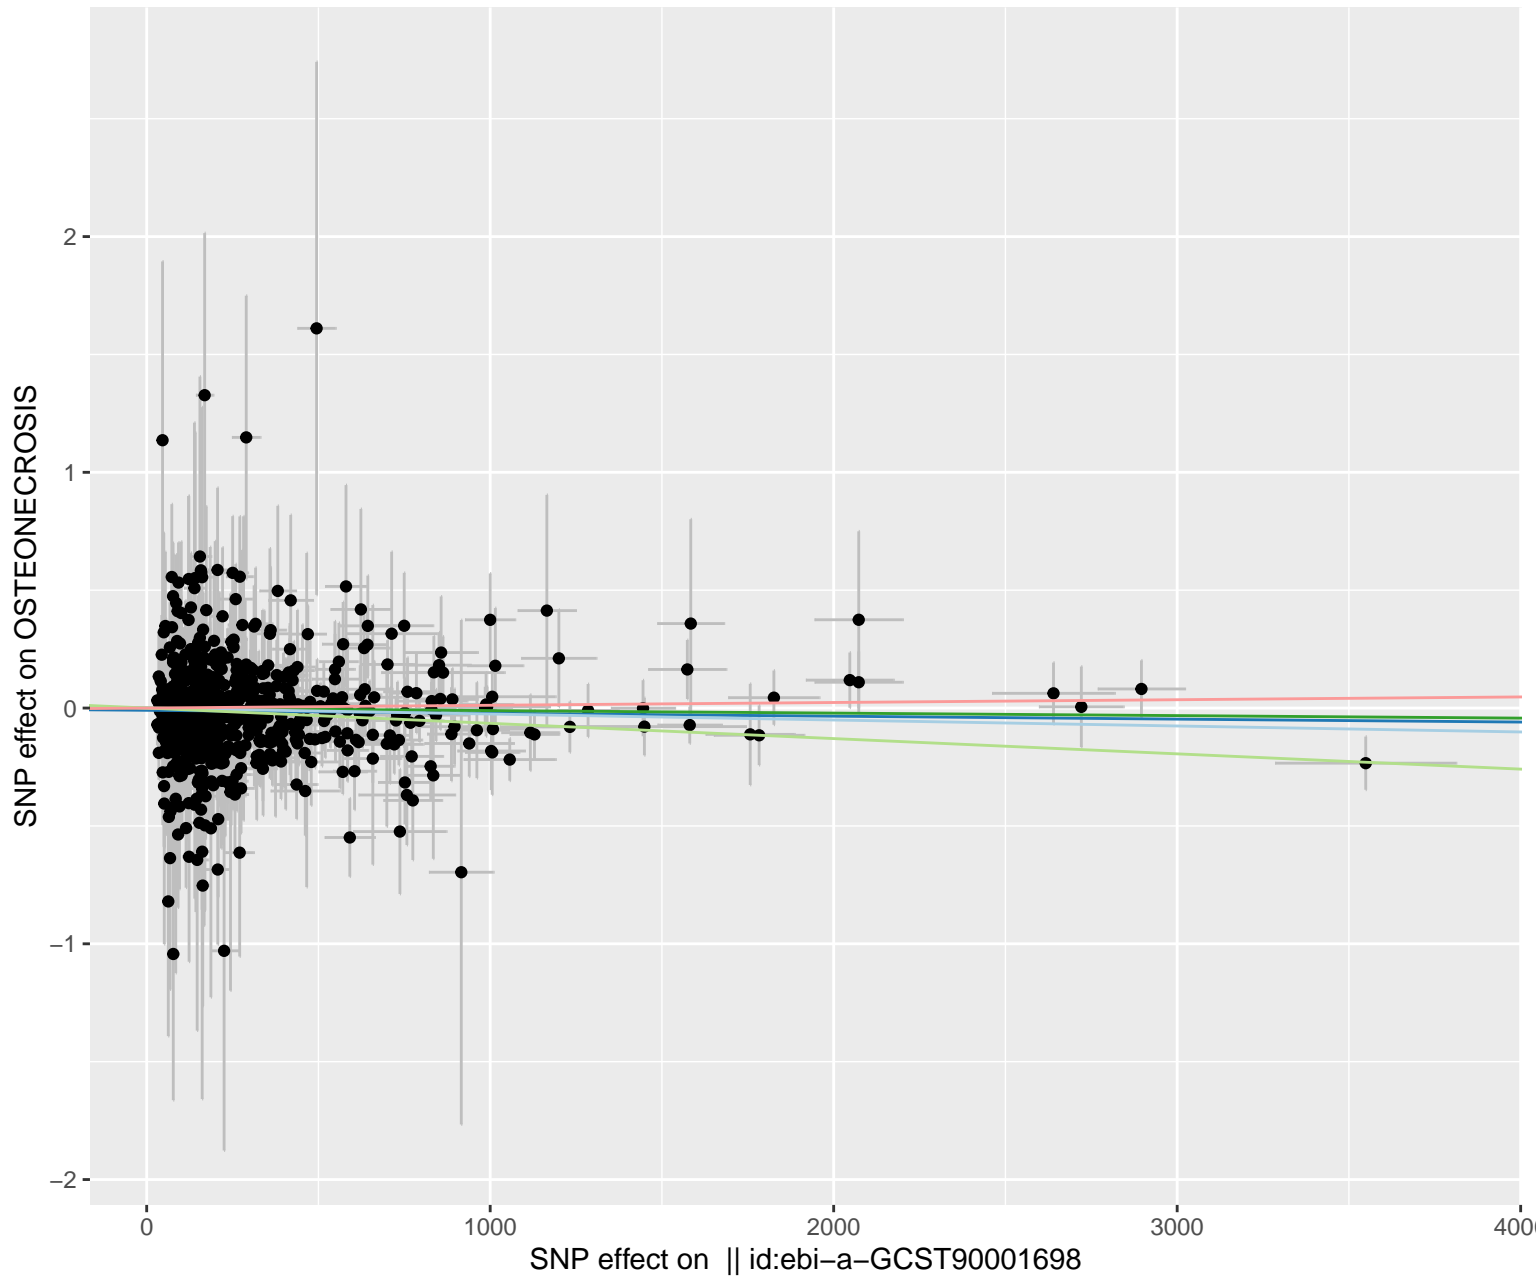



### MR Method

- Inverse variance weighted
- MR Egger

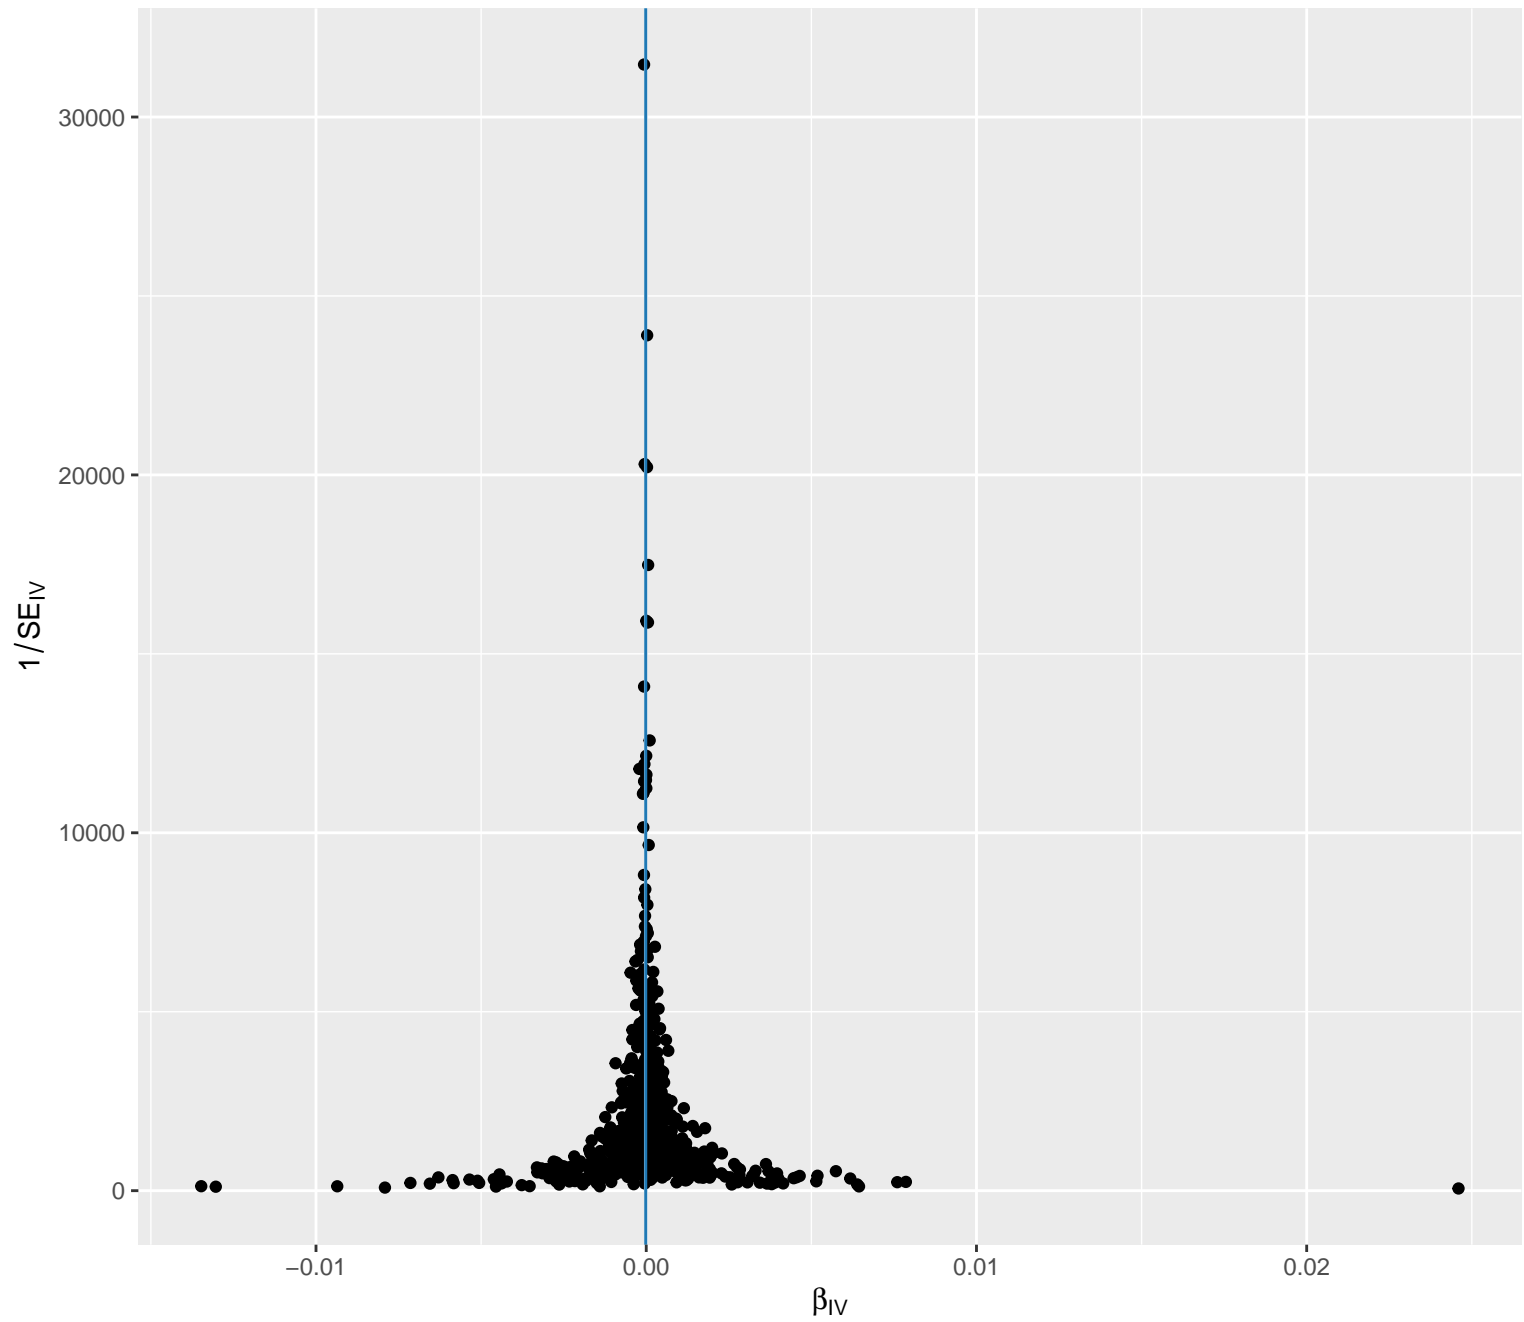

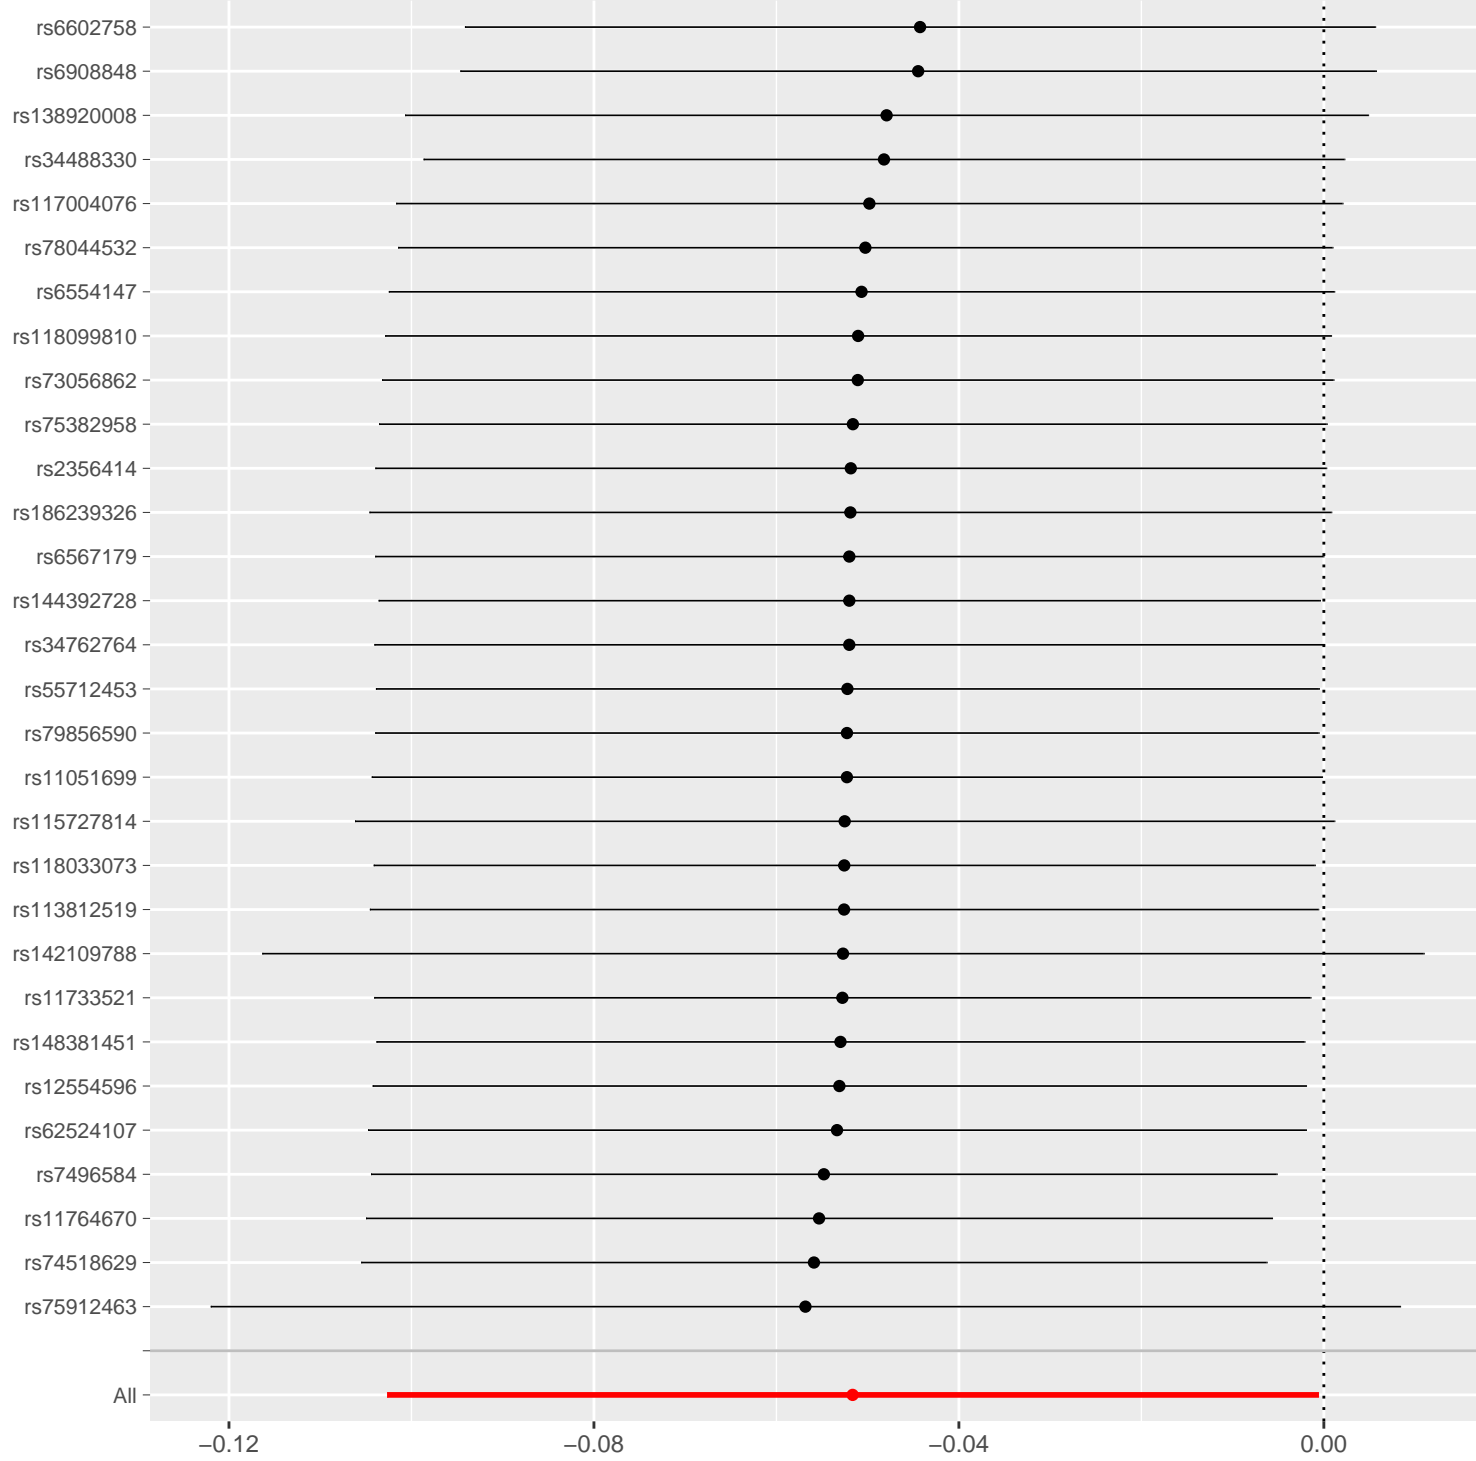

MR leave-one-out sensitivity analysis for '|| id:ebi-a-GCST90001726' on 'OSTEONECROSIS'

MR Test

- Inverse variance weighted
- MR Egger
- Simple mode
- Weighted median
- Weighted mode

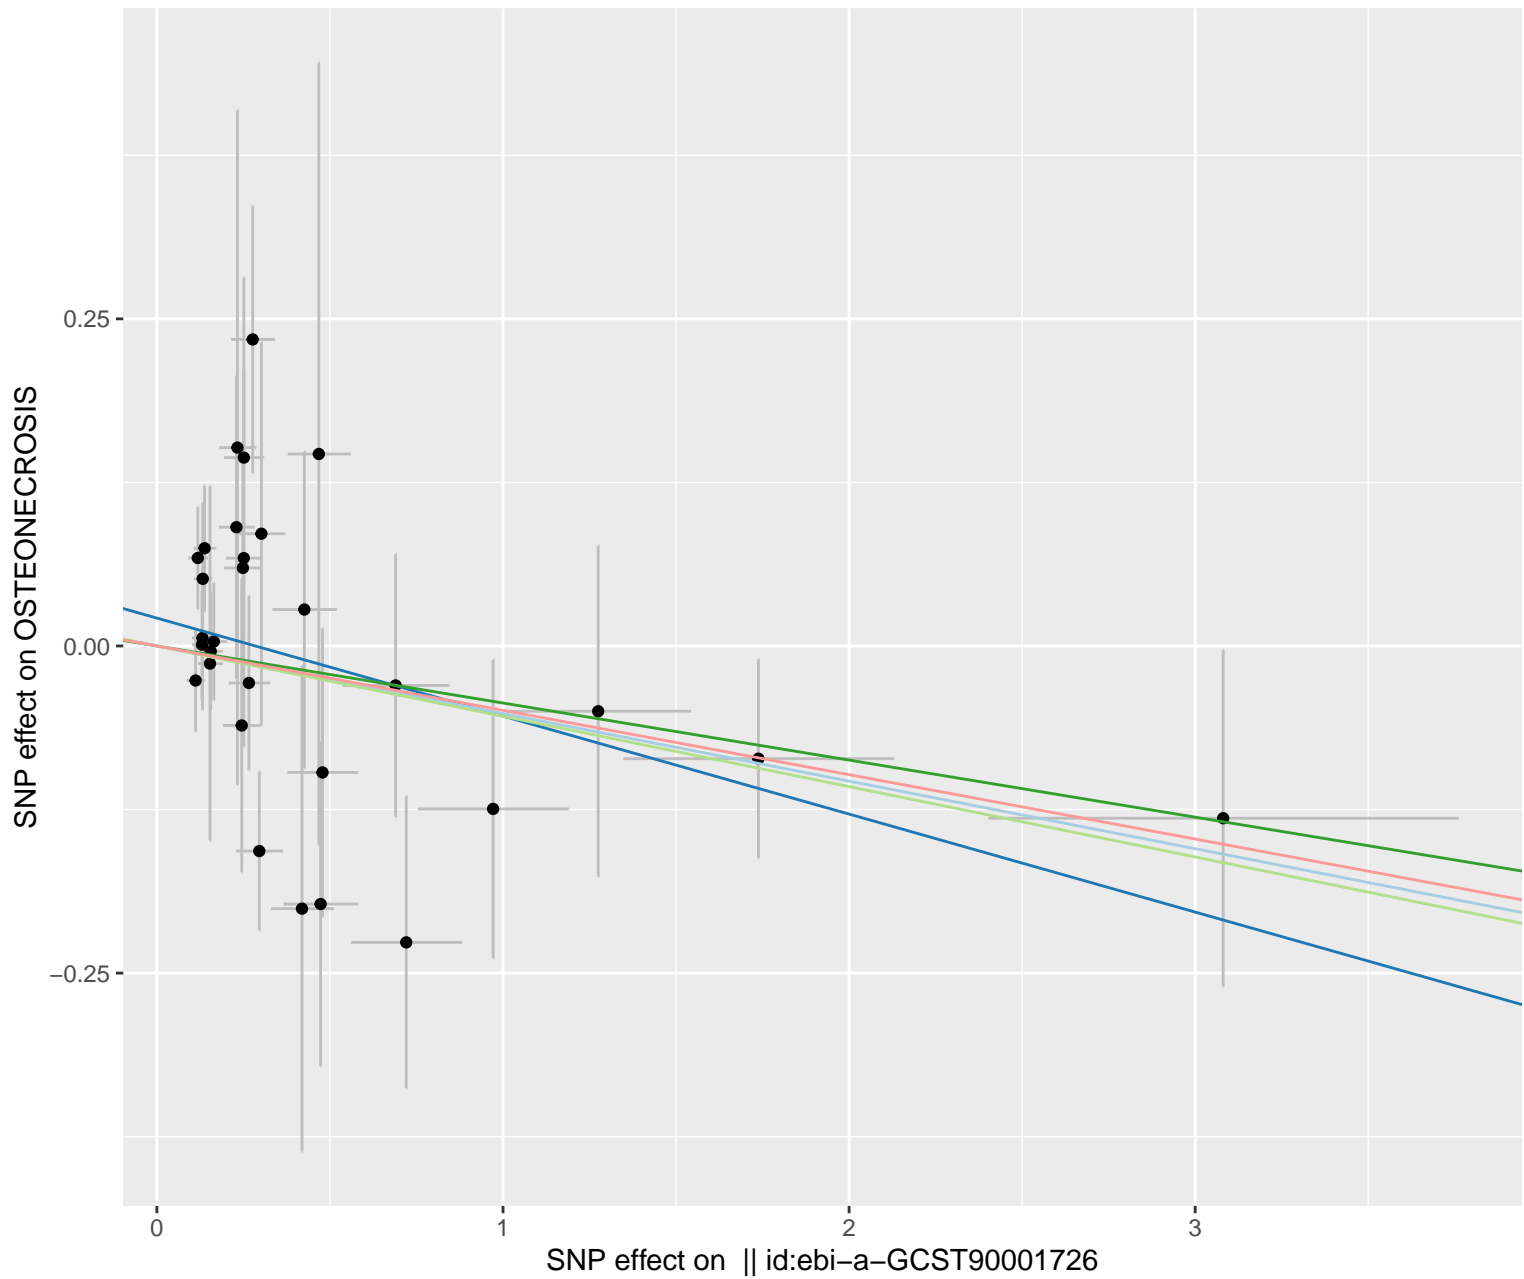

MR Method

- Inverse variance weighted
- MR Egger

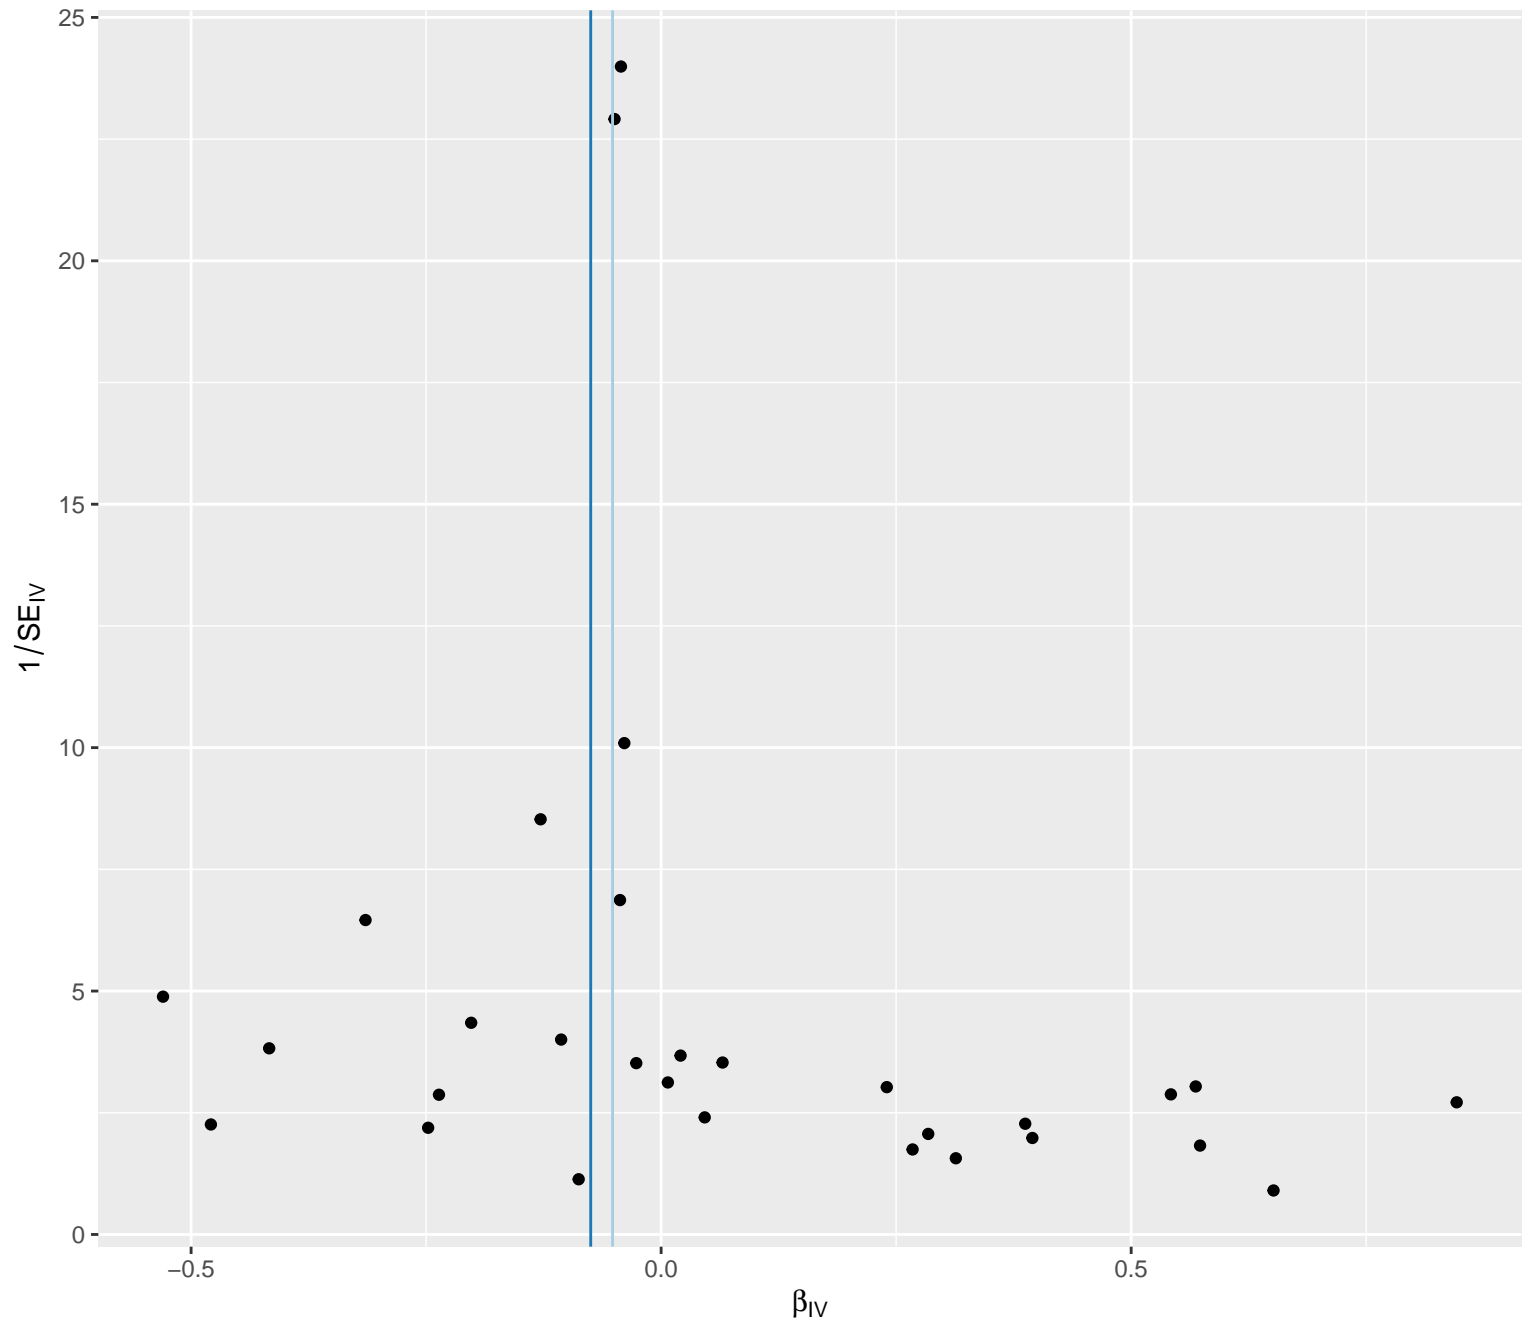

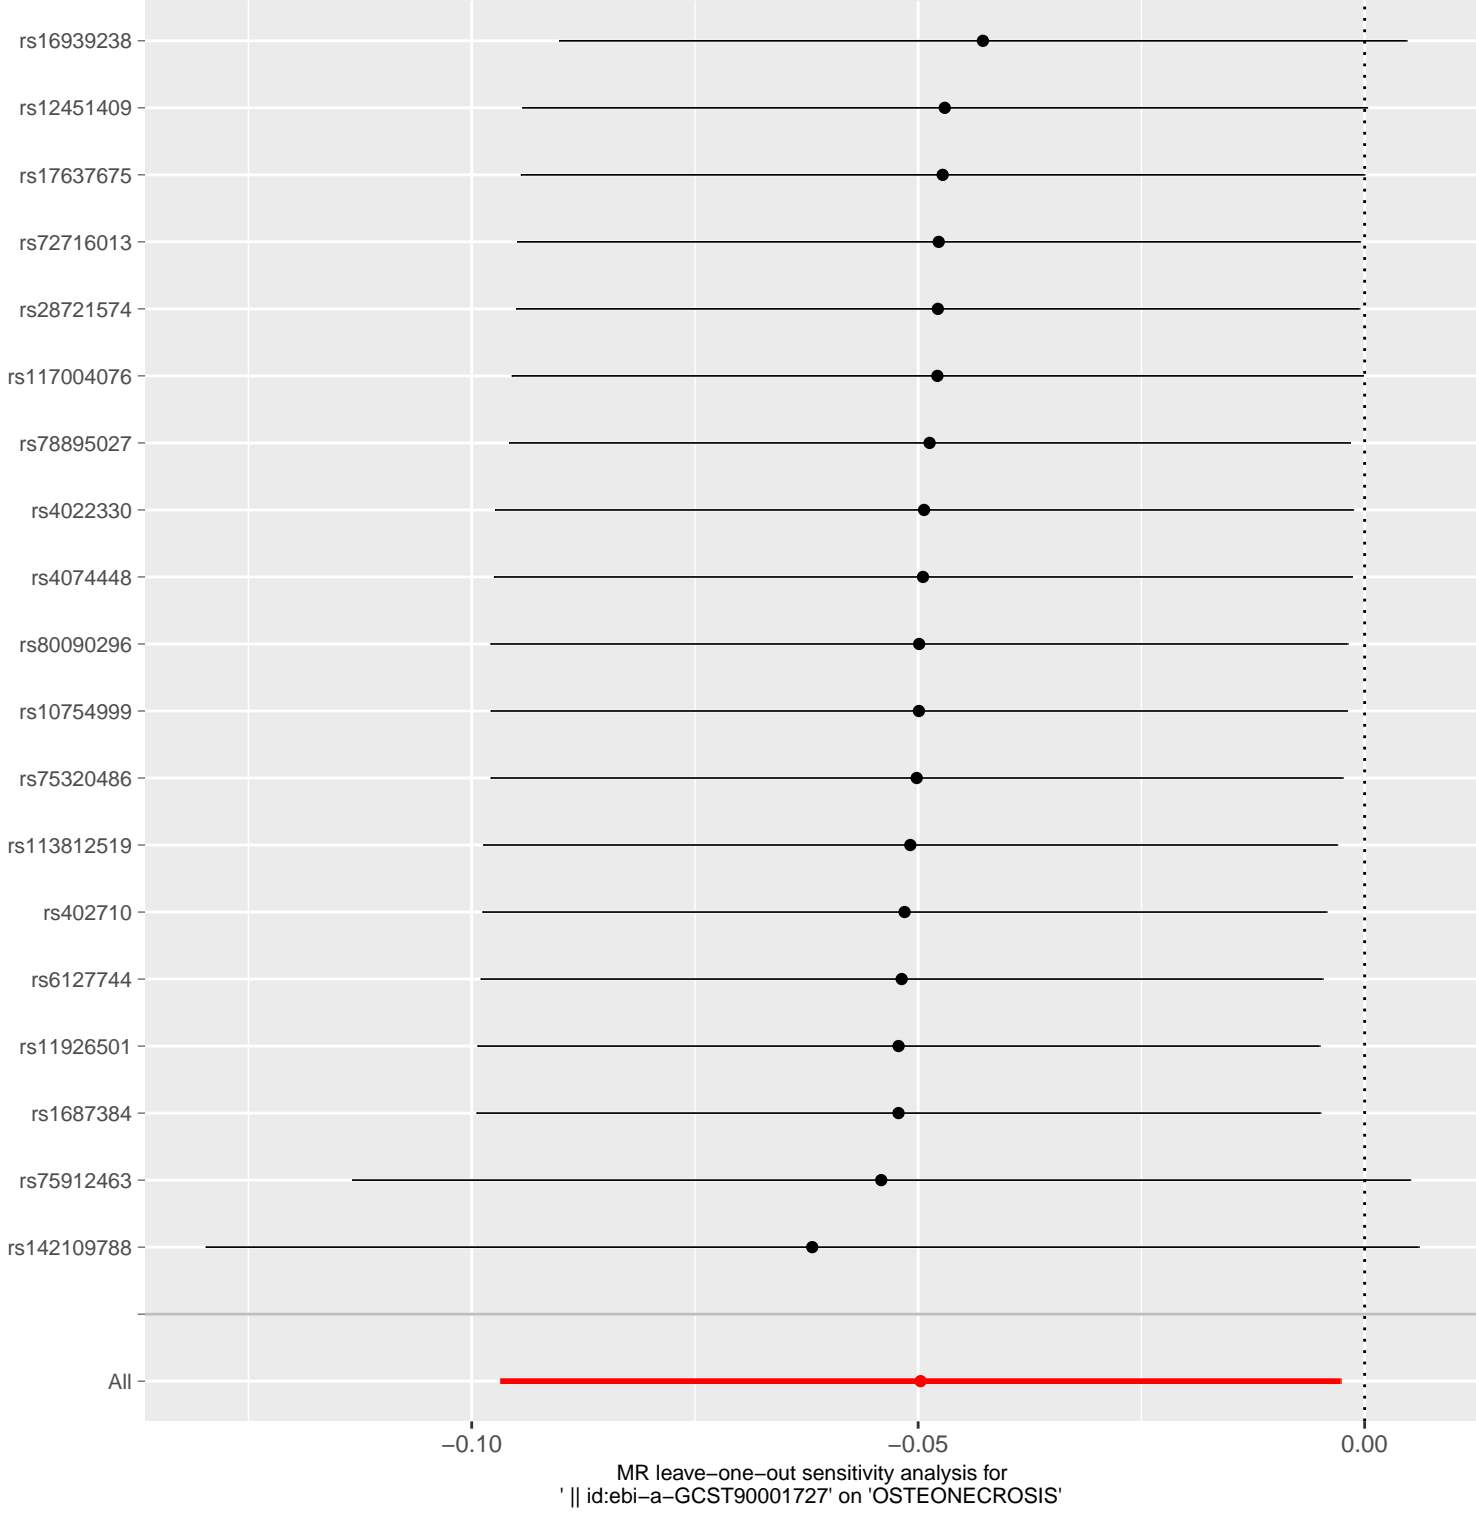

MR Test

- Inverse variance weighted
- MR Egger
- Simple mode
- Weighted median
- Weighted mode

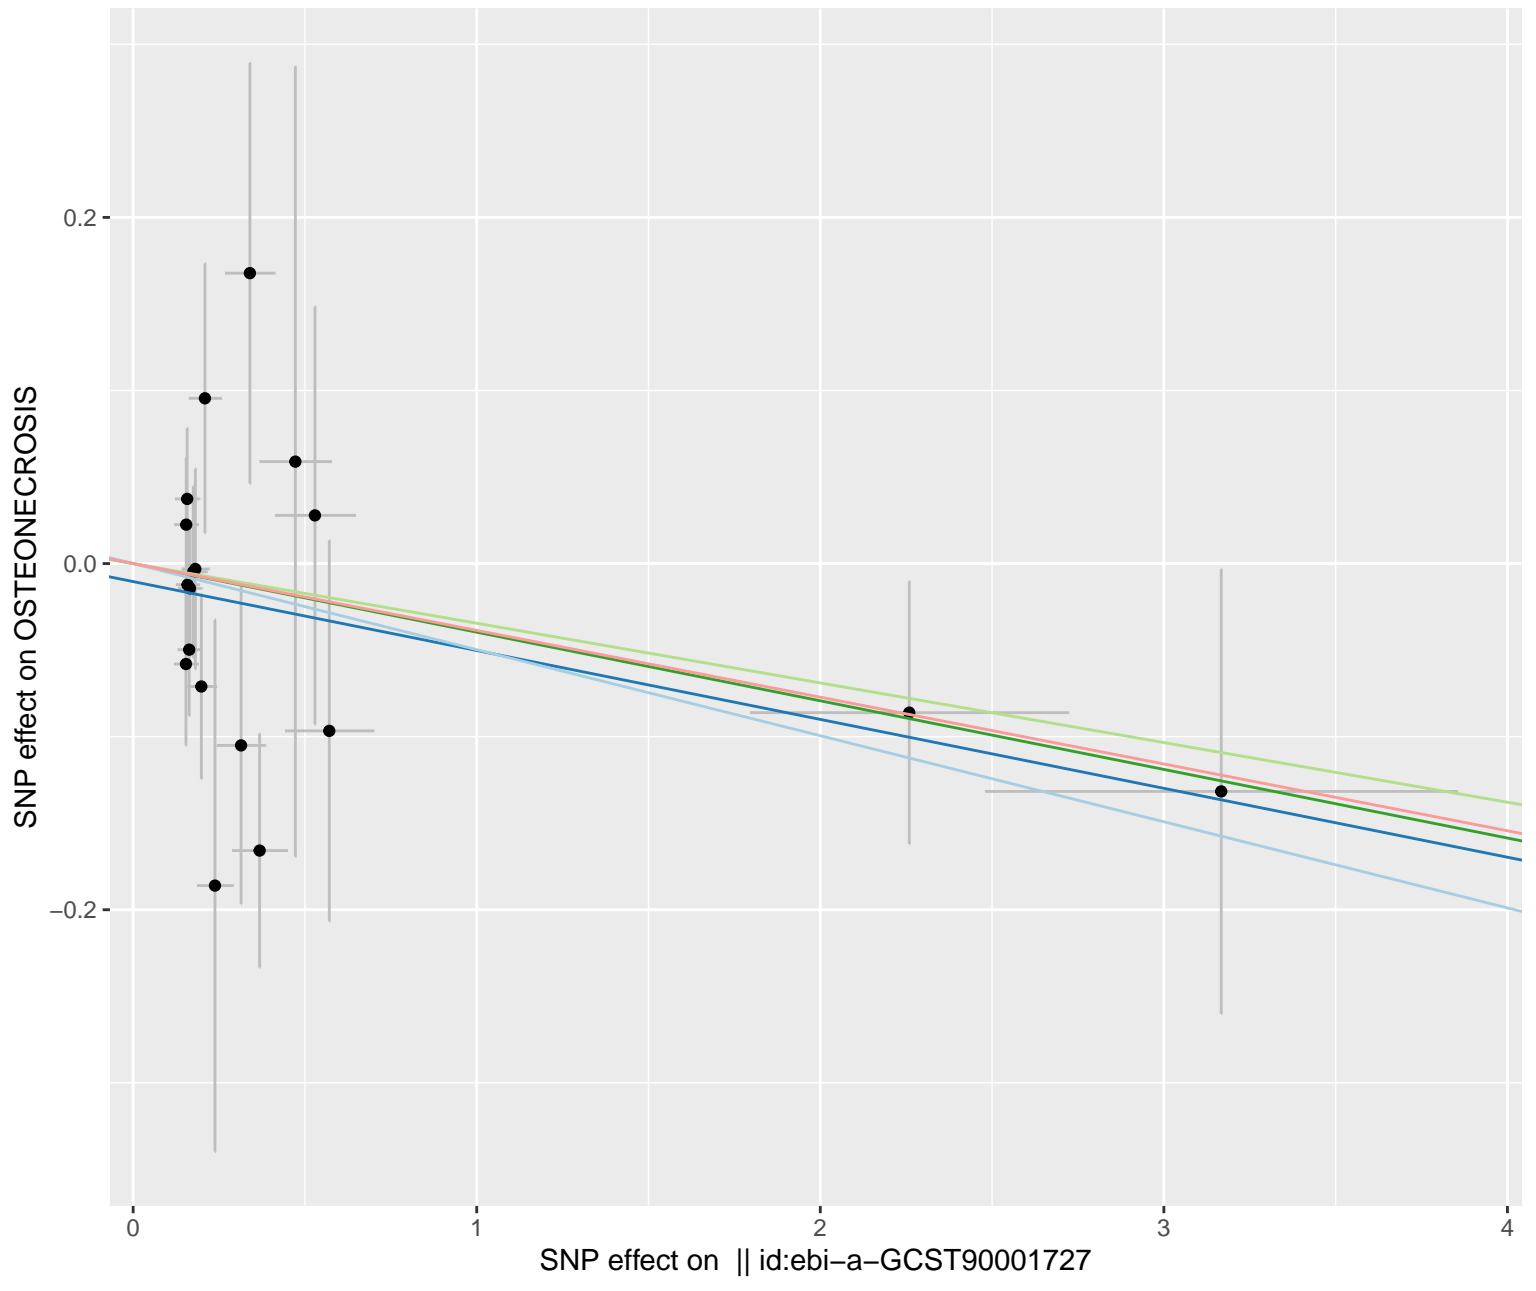

MR Method

- Inverse variance weighted
- MR Egger

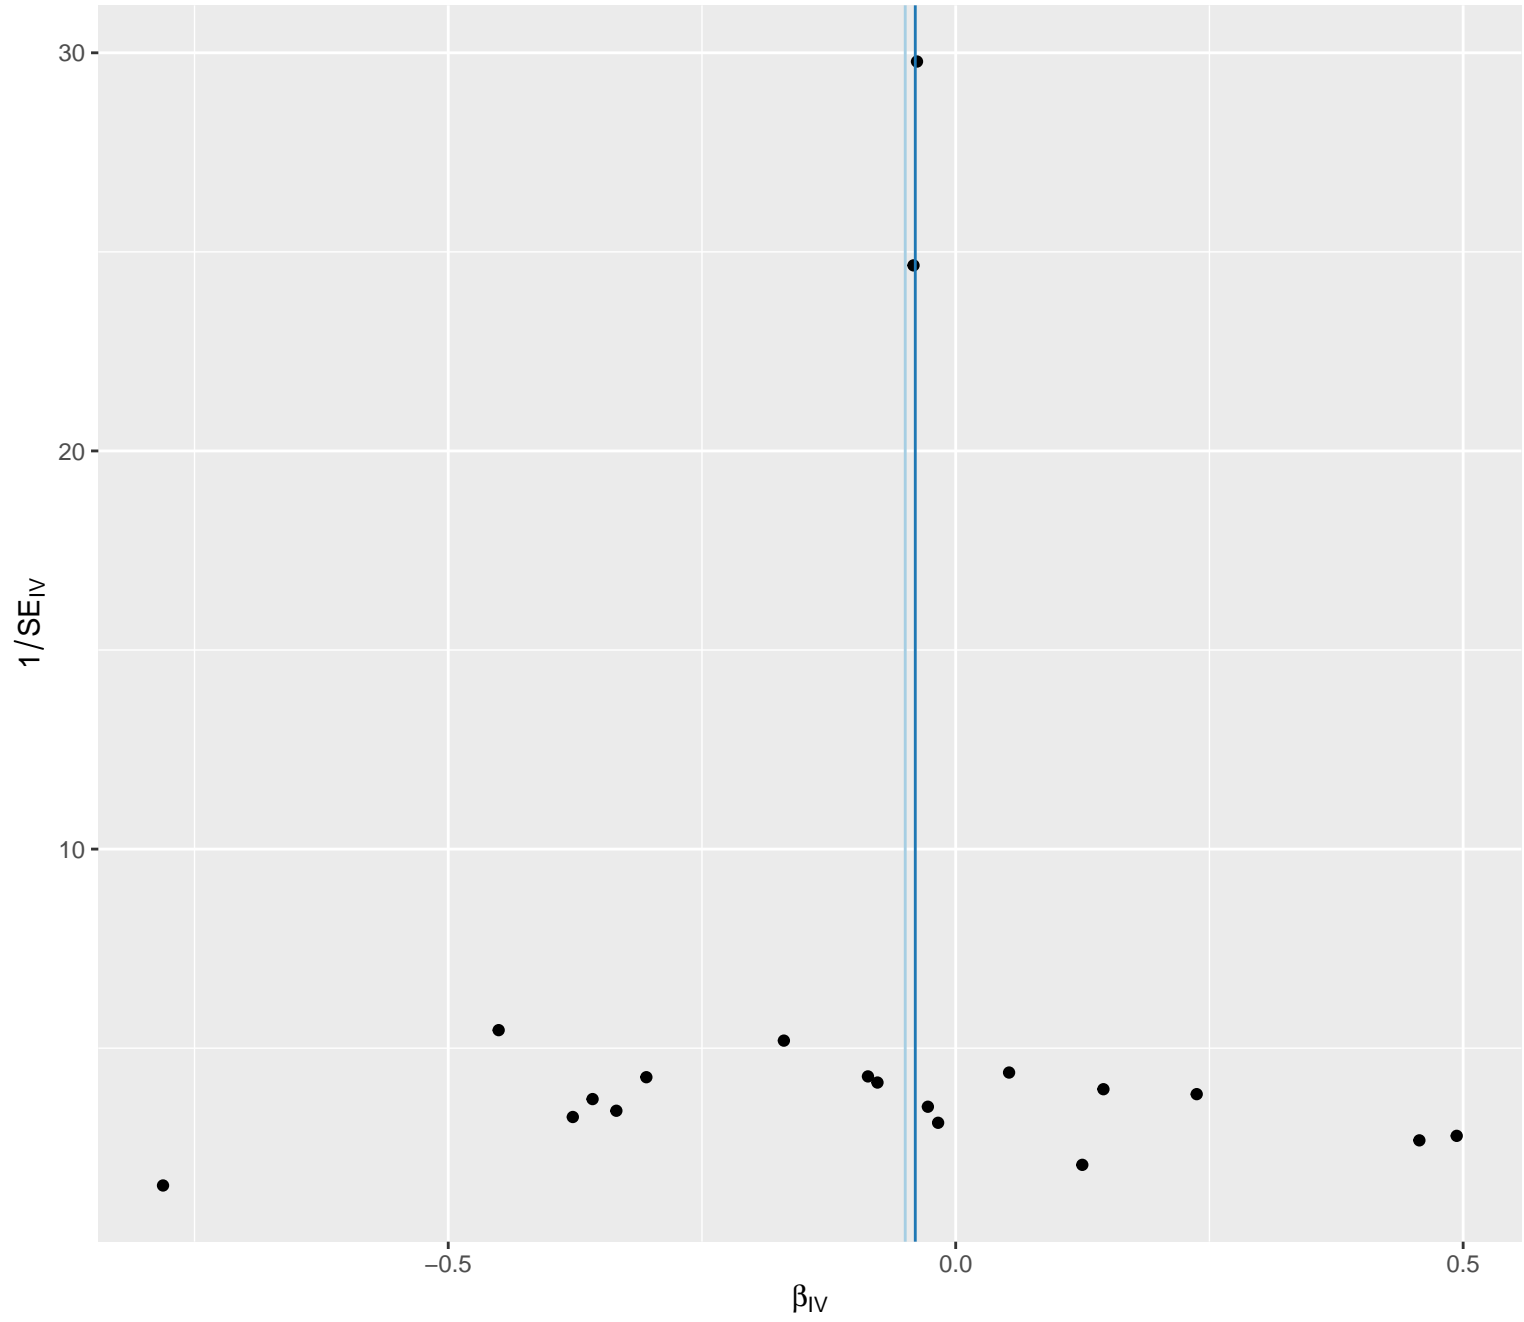

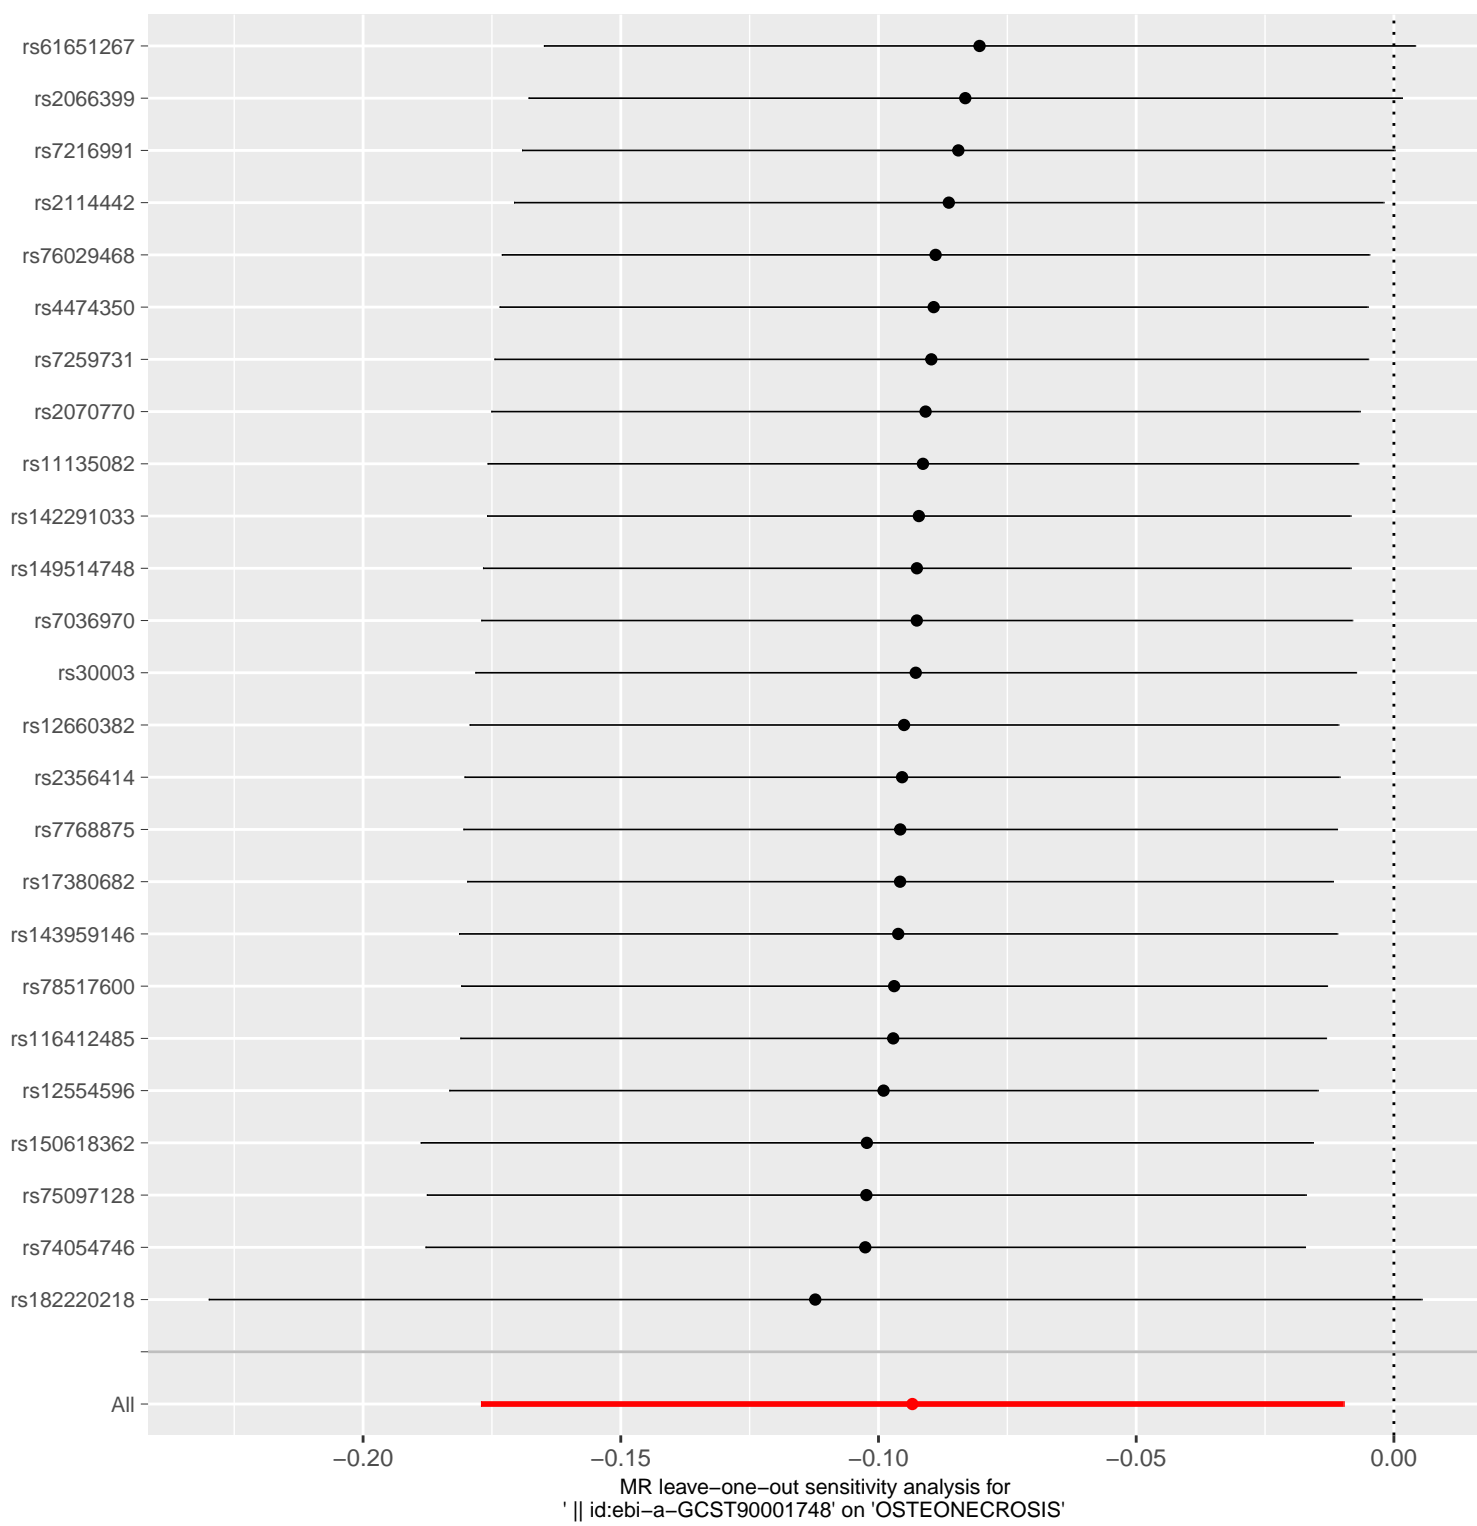



### MR Test

- Inverse variance weighted
- MR Egger
- Simple mode
- Weighted median
- Weighted mode

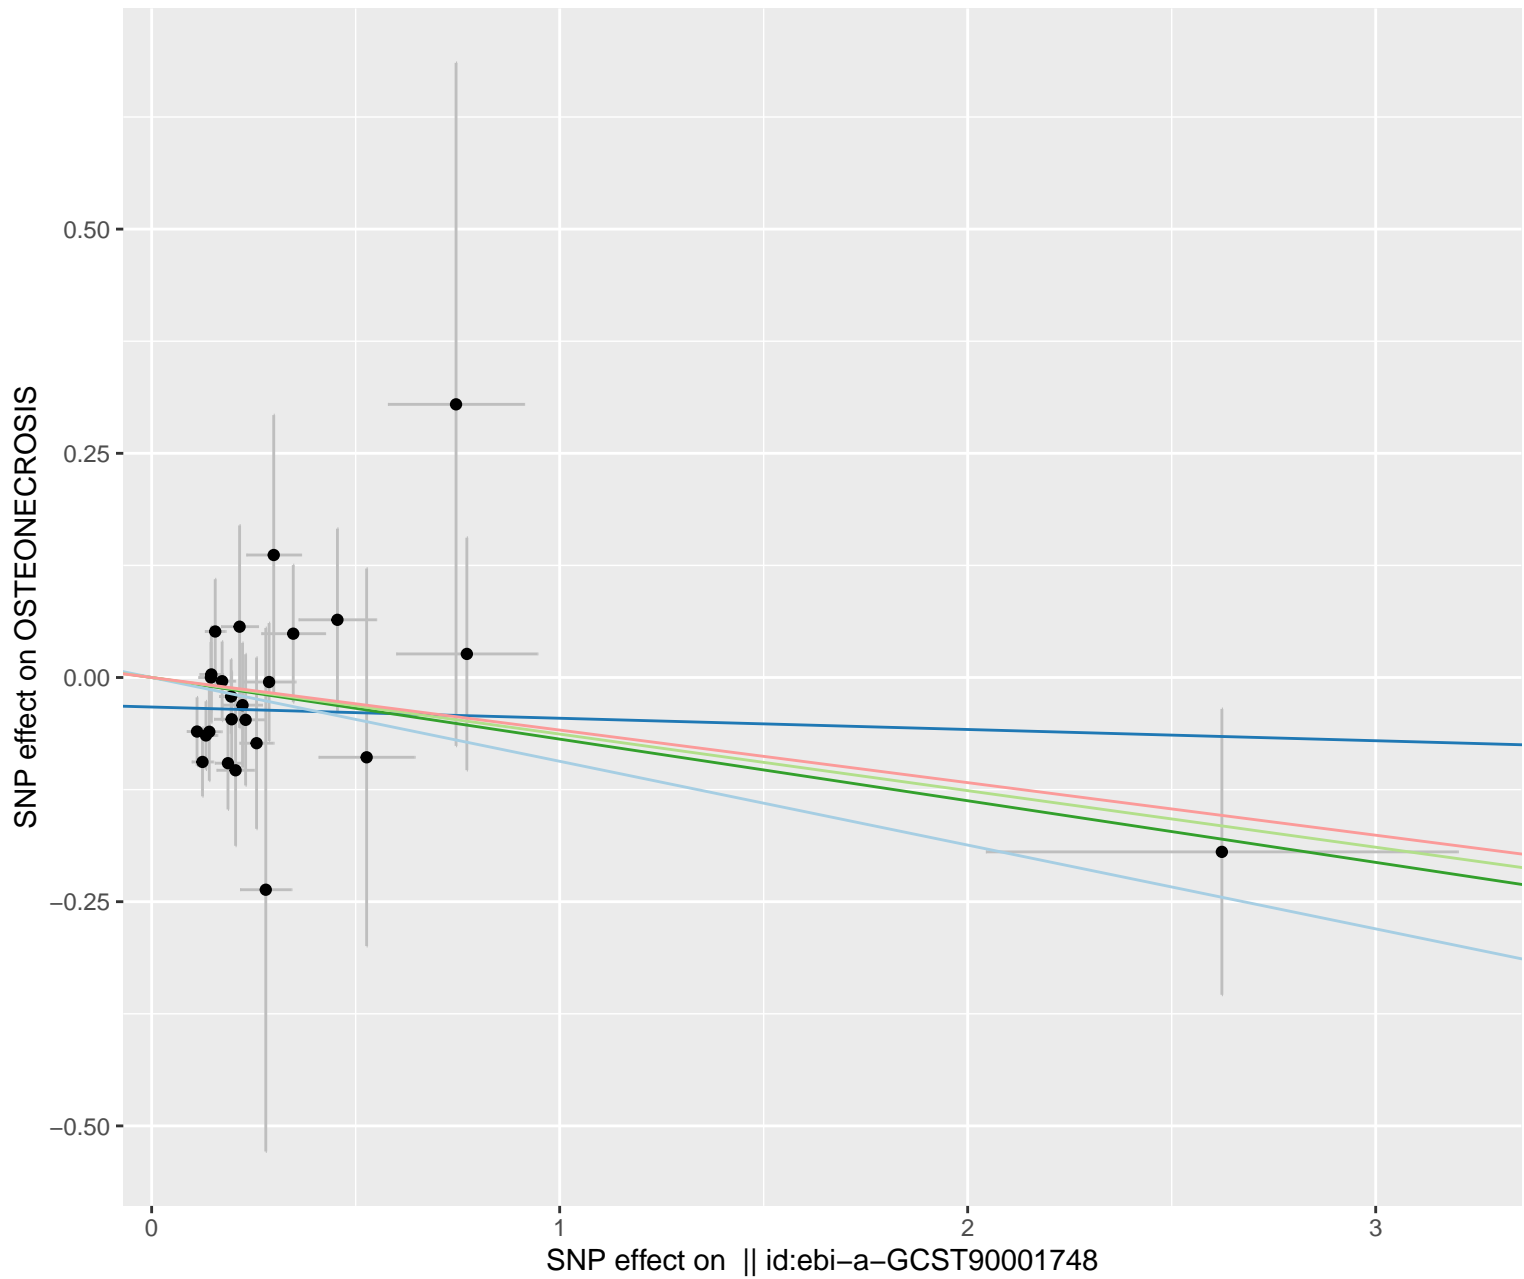

MR Method

- Inverse variance weighted
- MR Egger

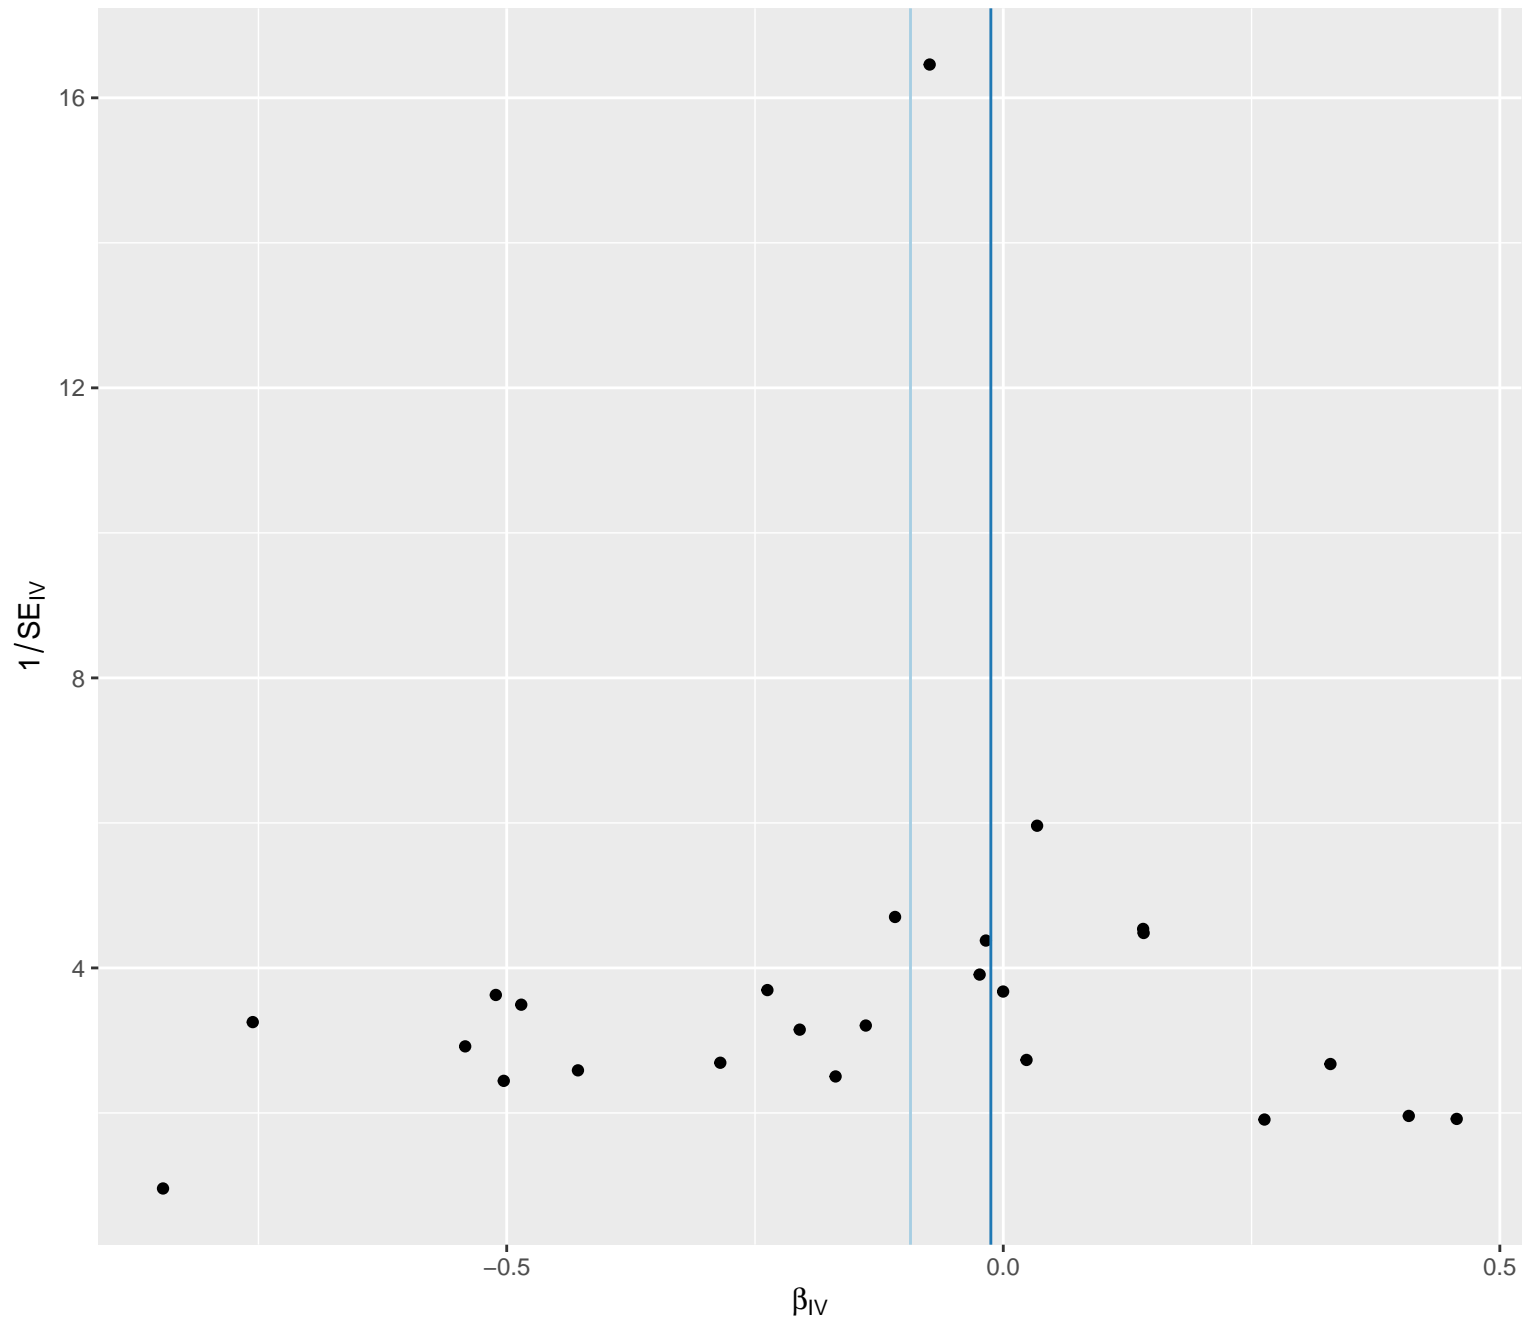

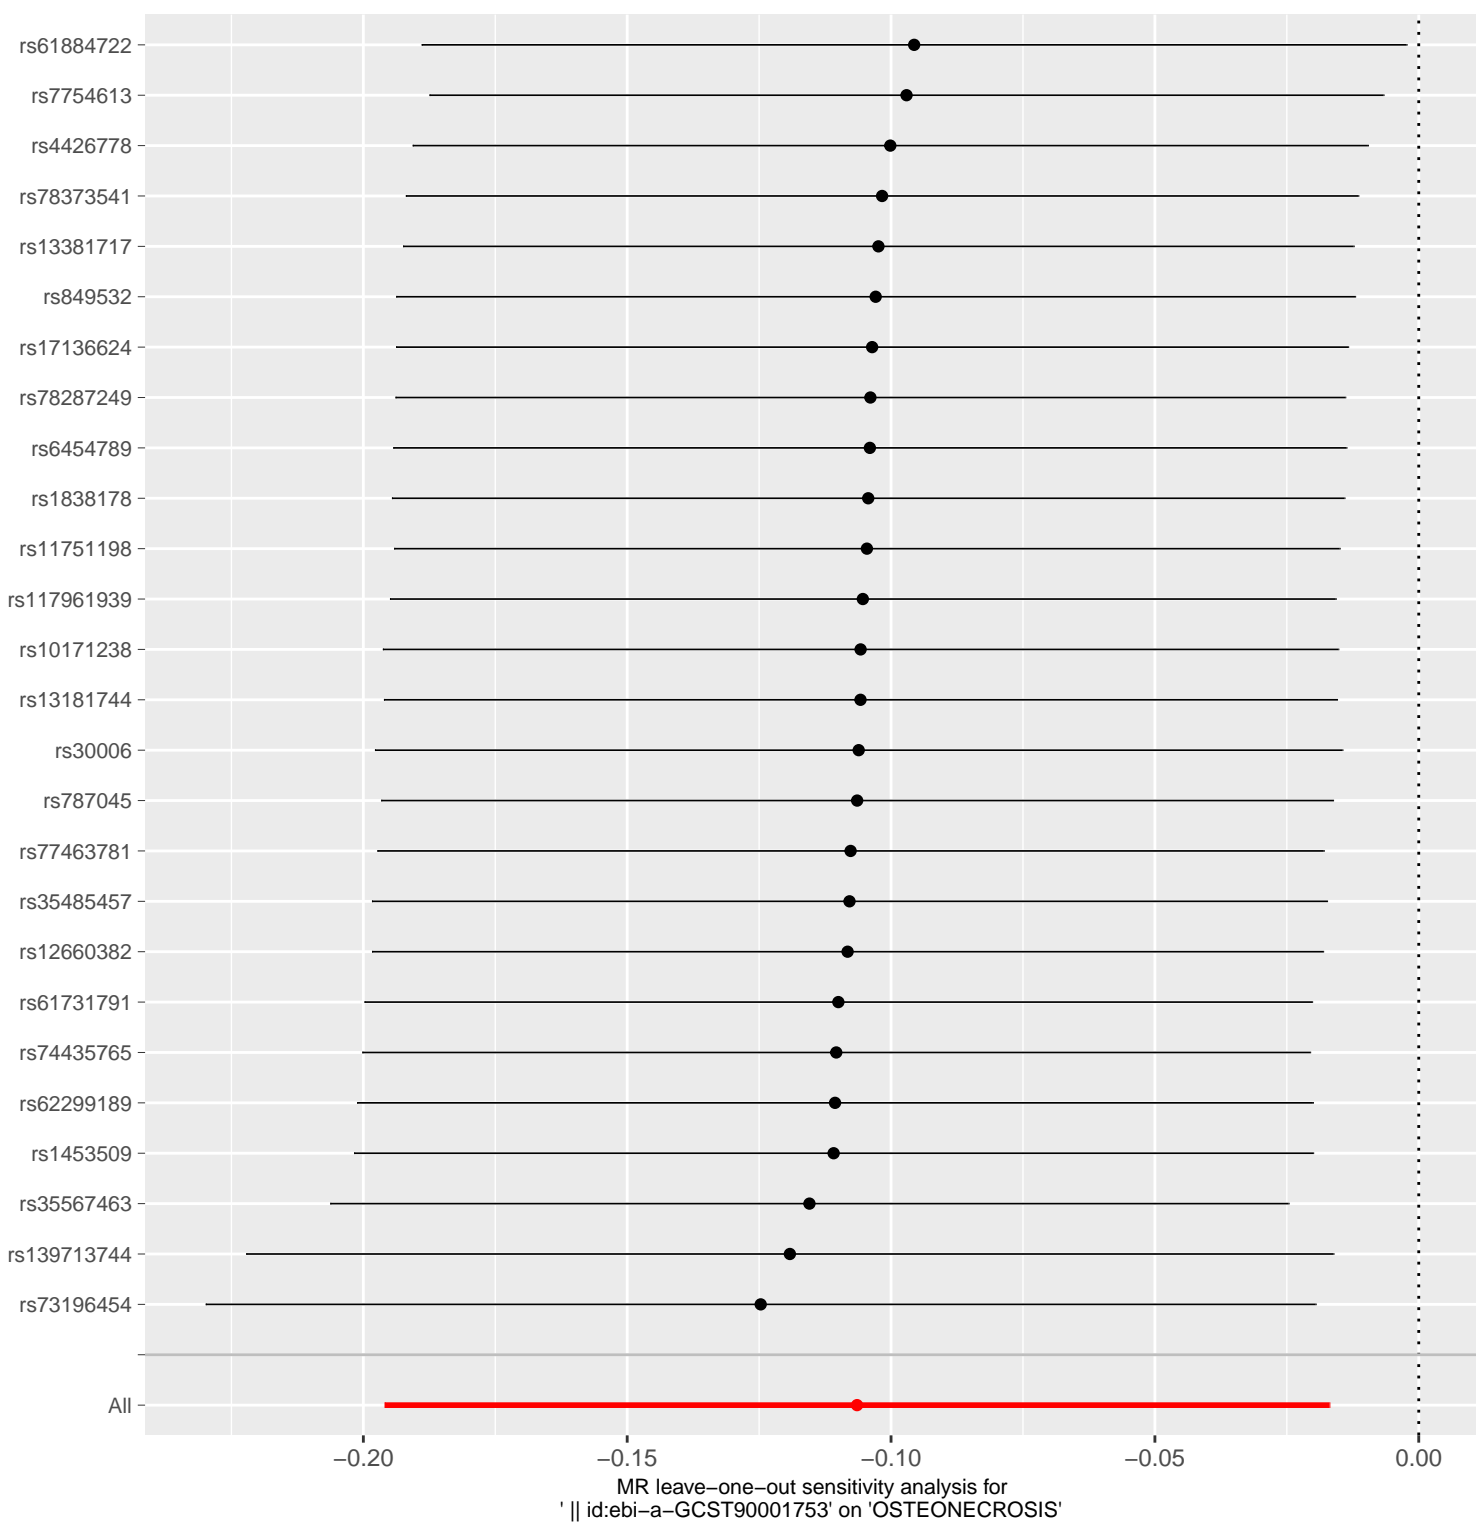

MR Test

- Inverse variance weighted
- MR Egger
- Simple mode
- Weighted median
- Weighted mode

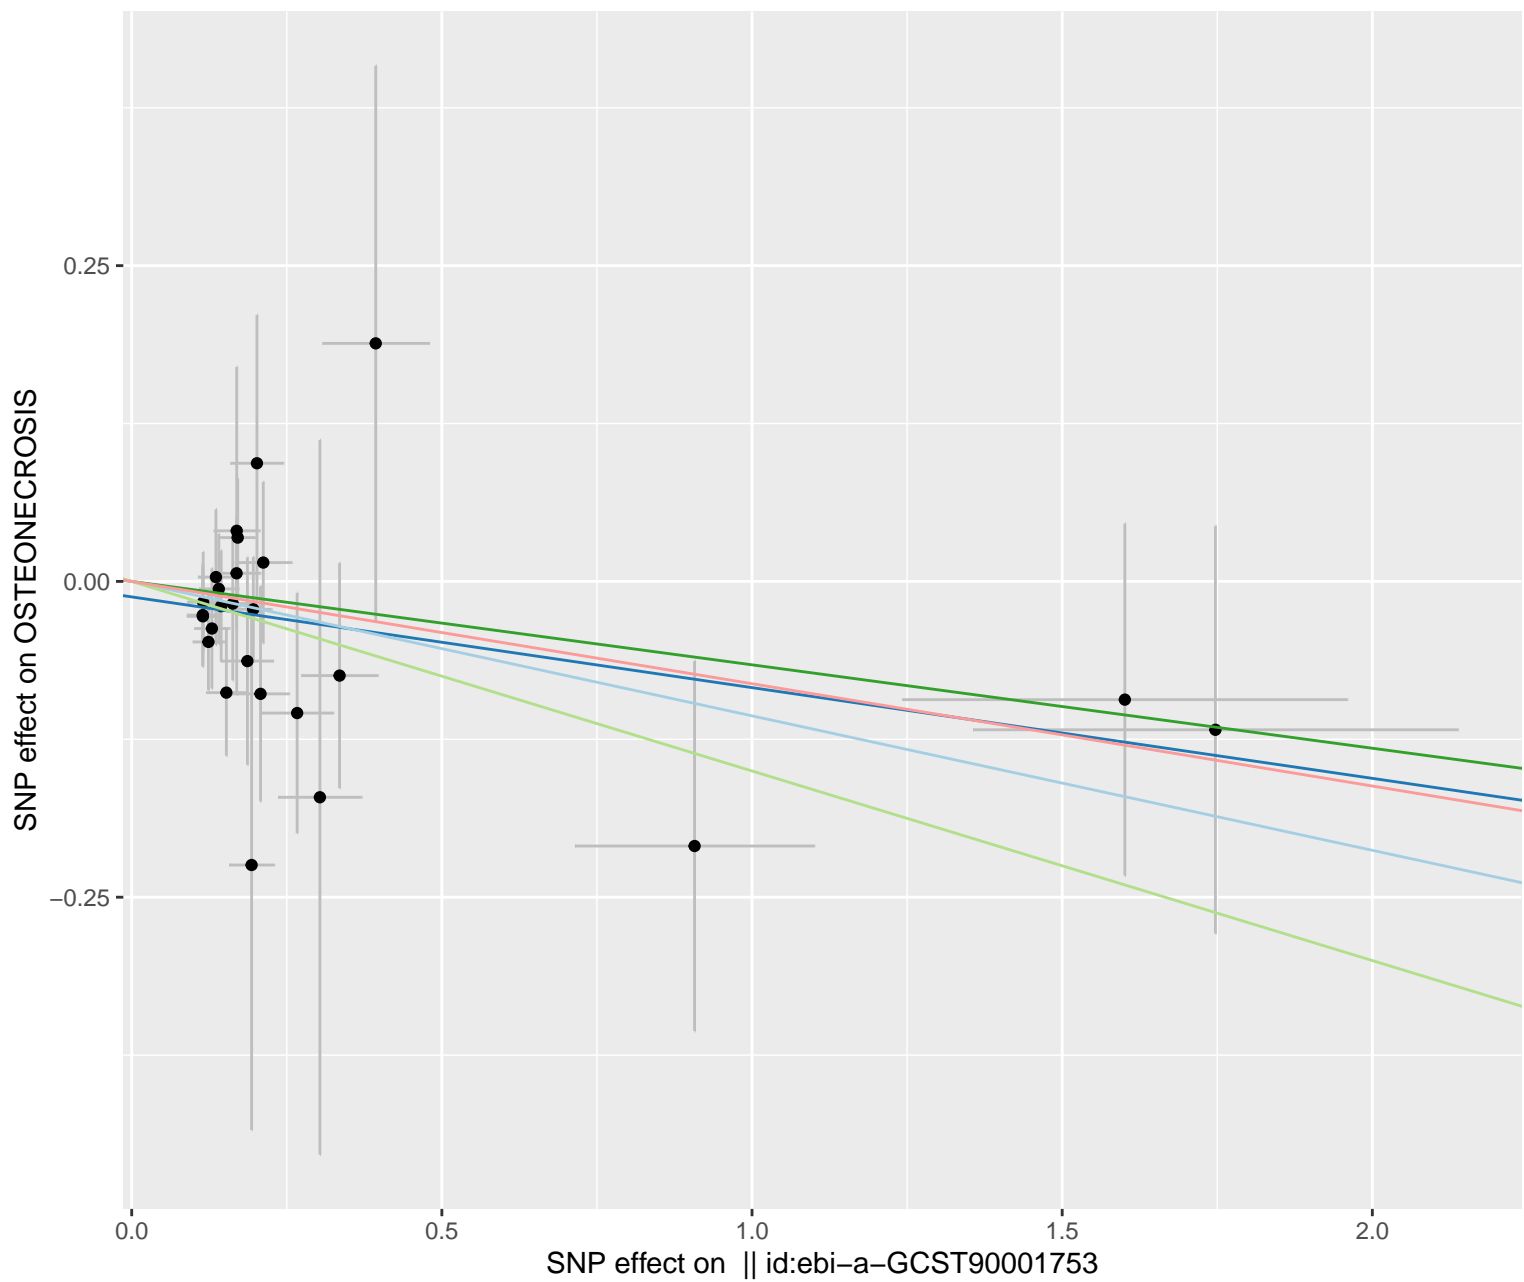

MR Method

- Inverse variance weighted
- MR Egger

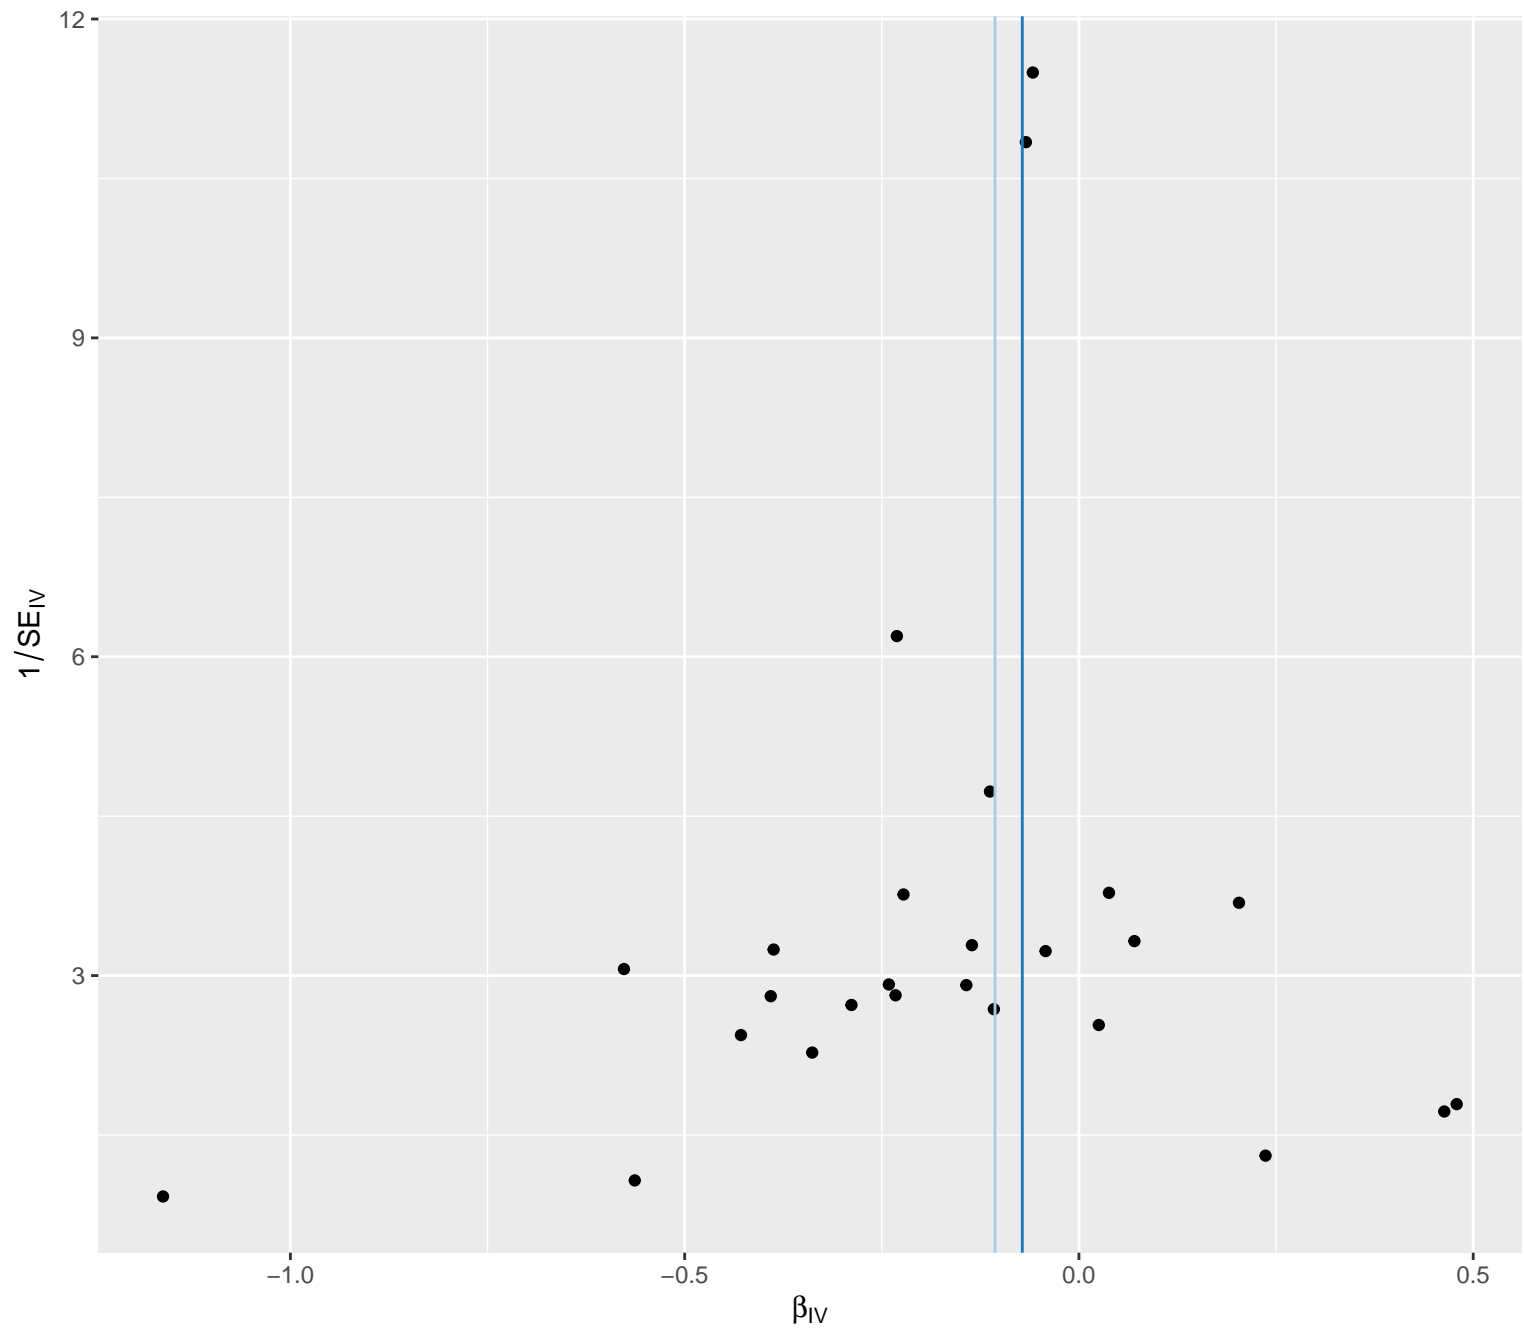

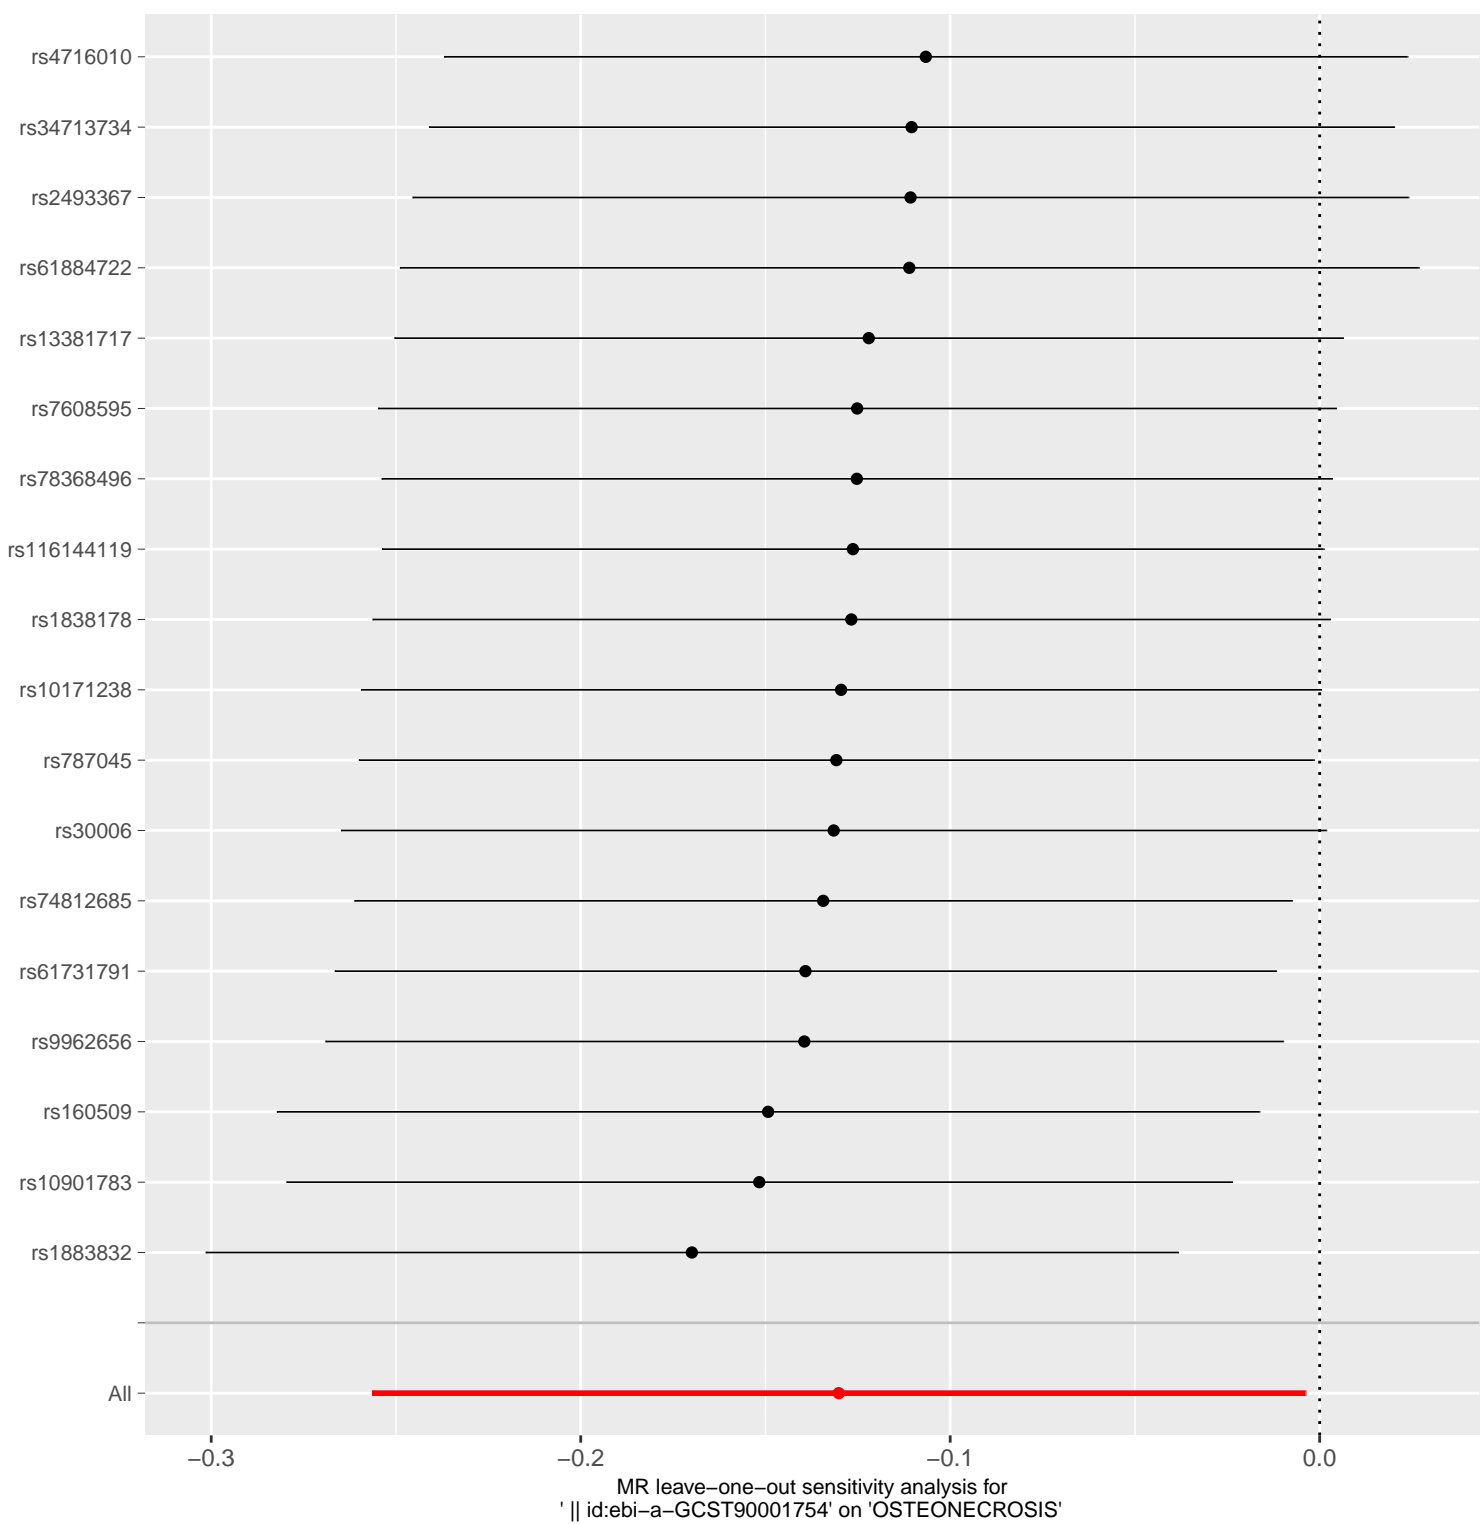

MR Test

- Inverse variance weighted
- MR Egger
- Simple mode
- Weighted median
- Weighted mode

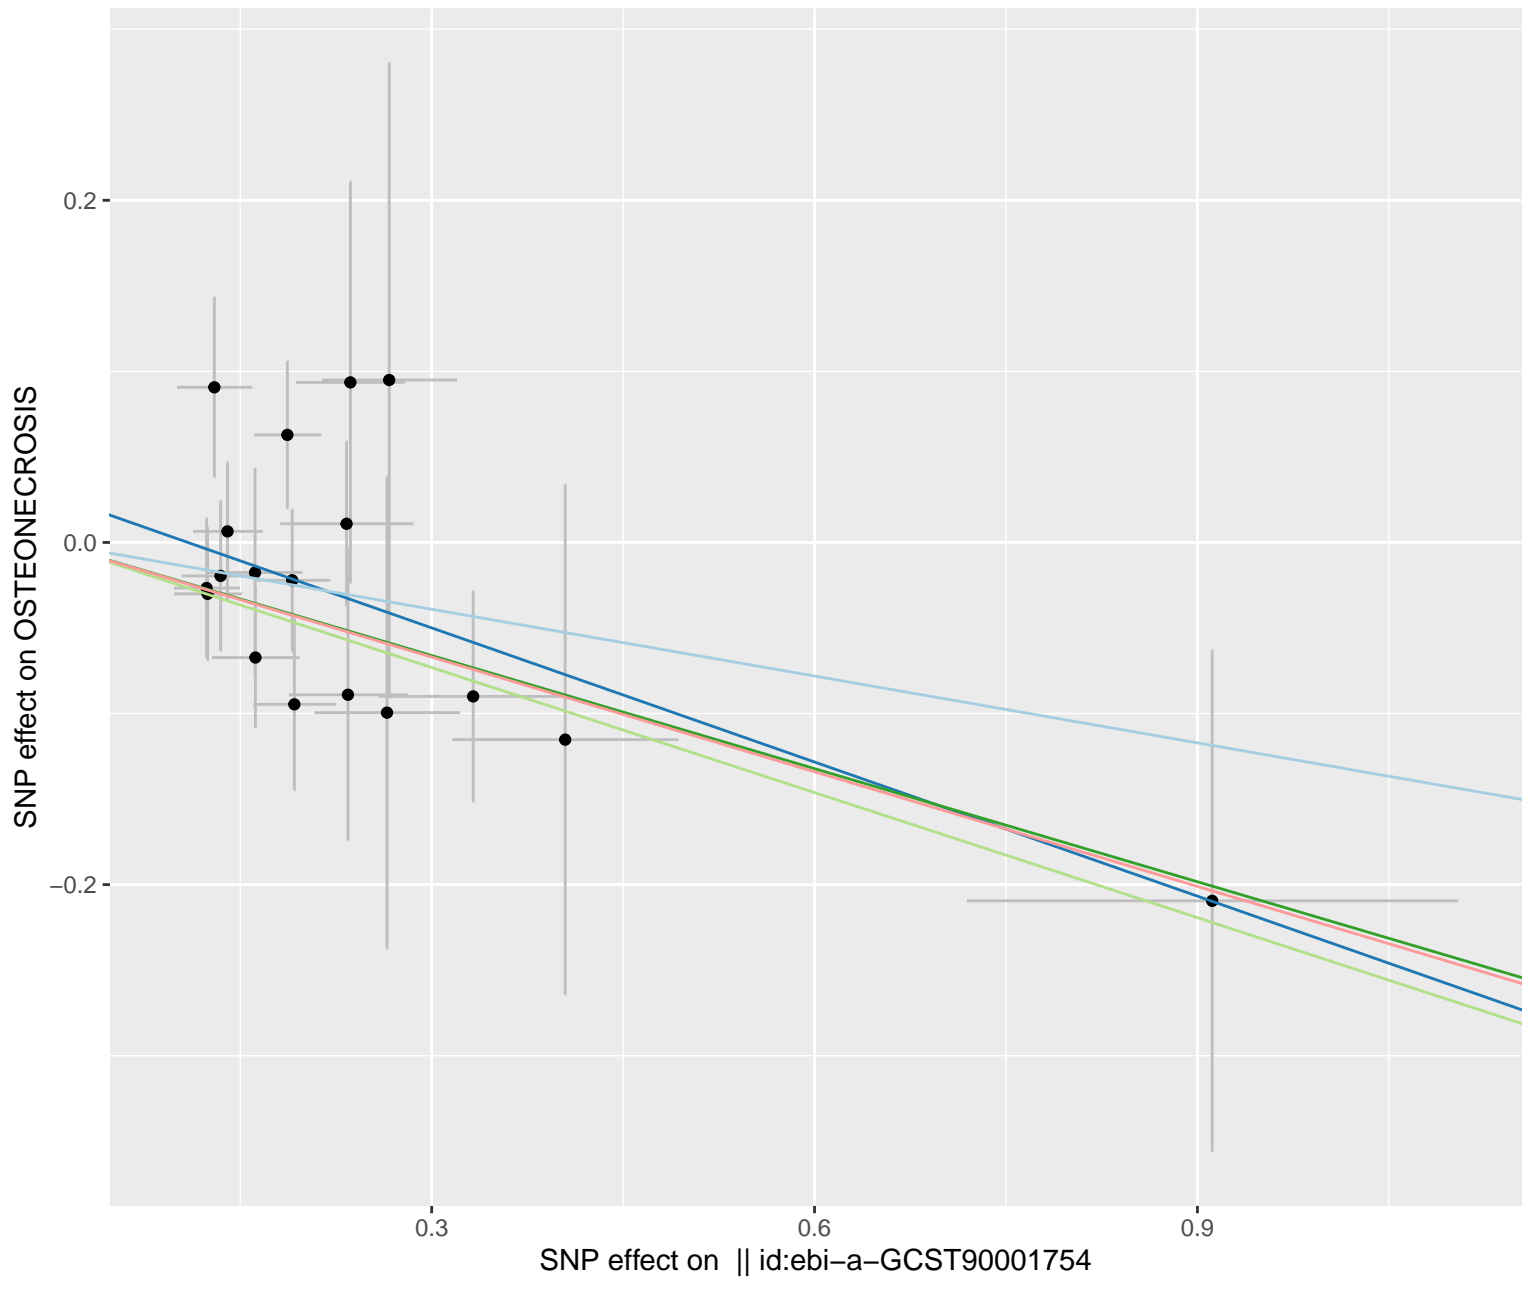

### MR Method

- Inverse variance weighted
- MR Egger

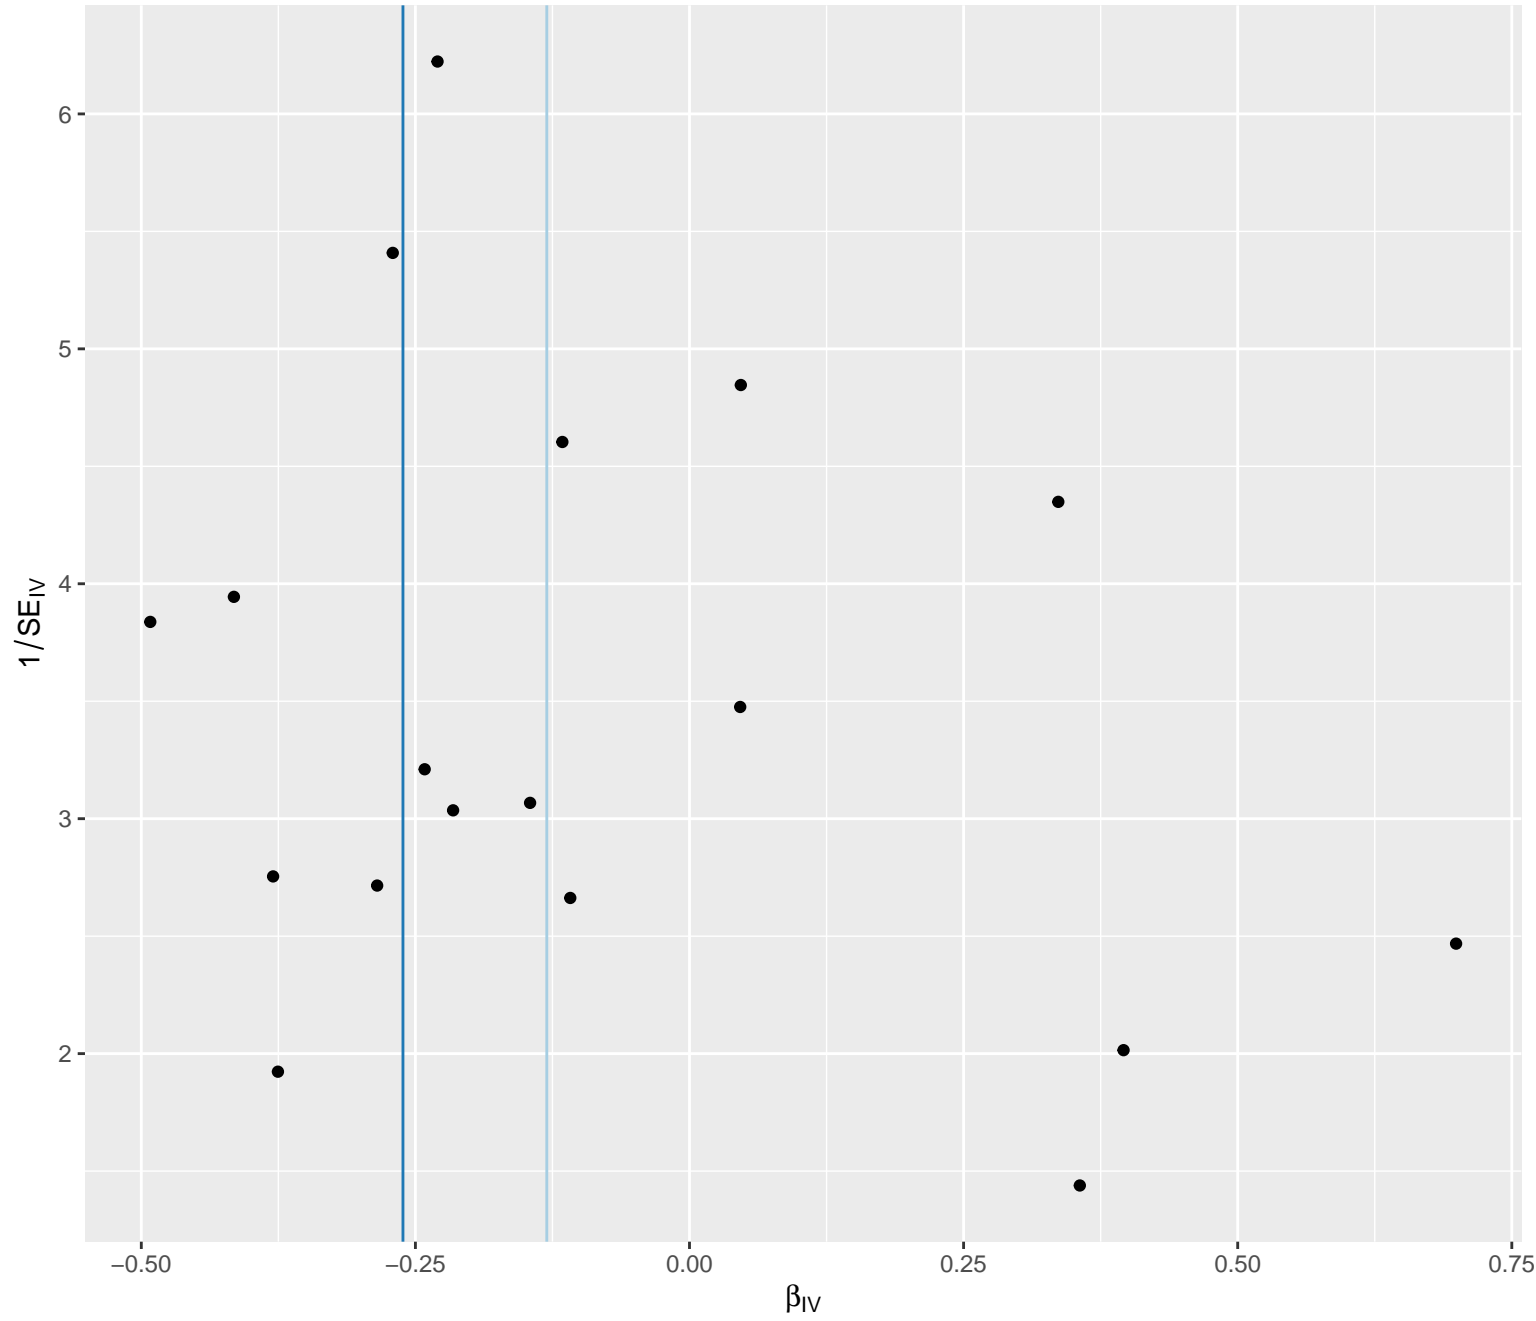



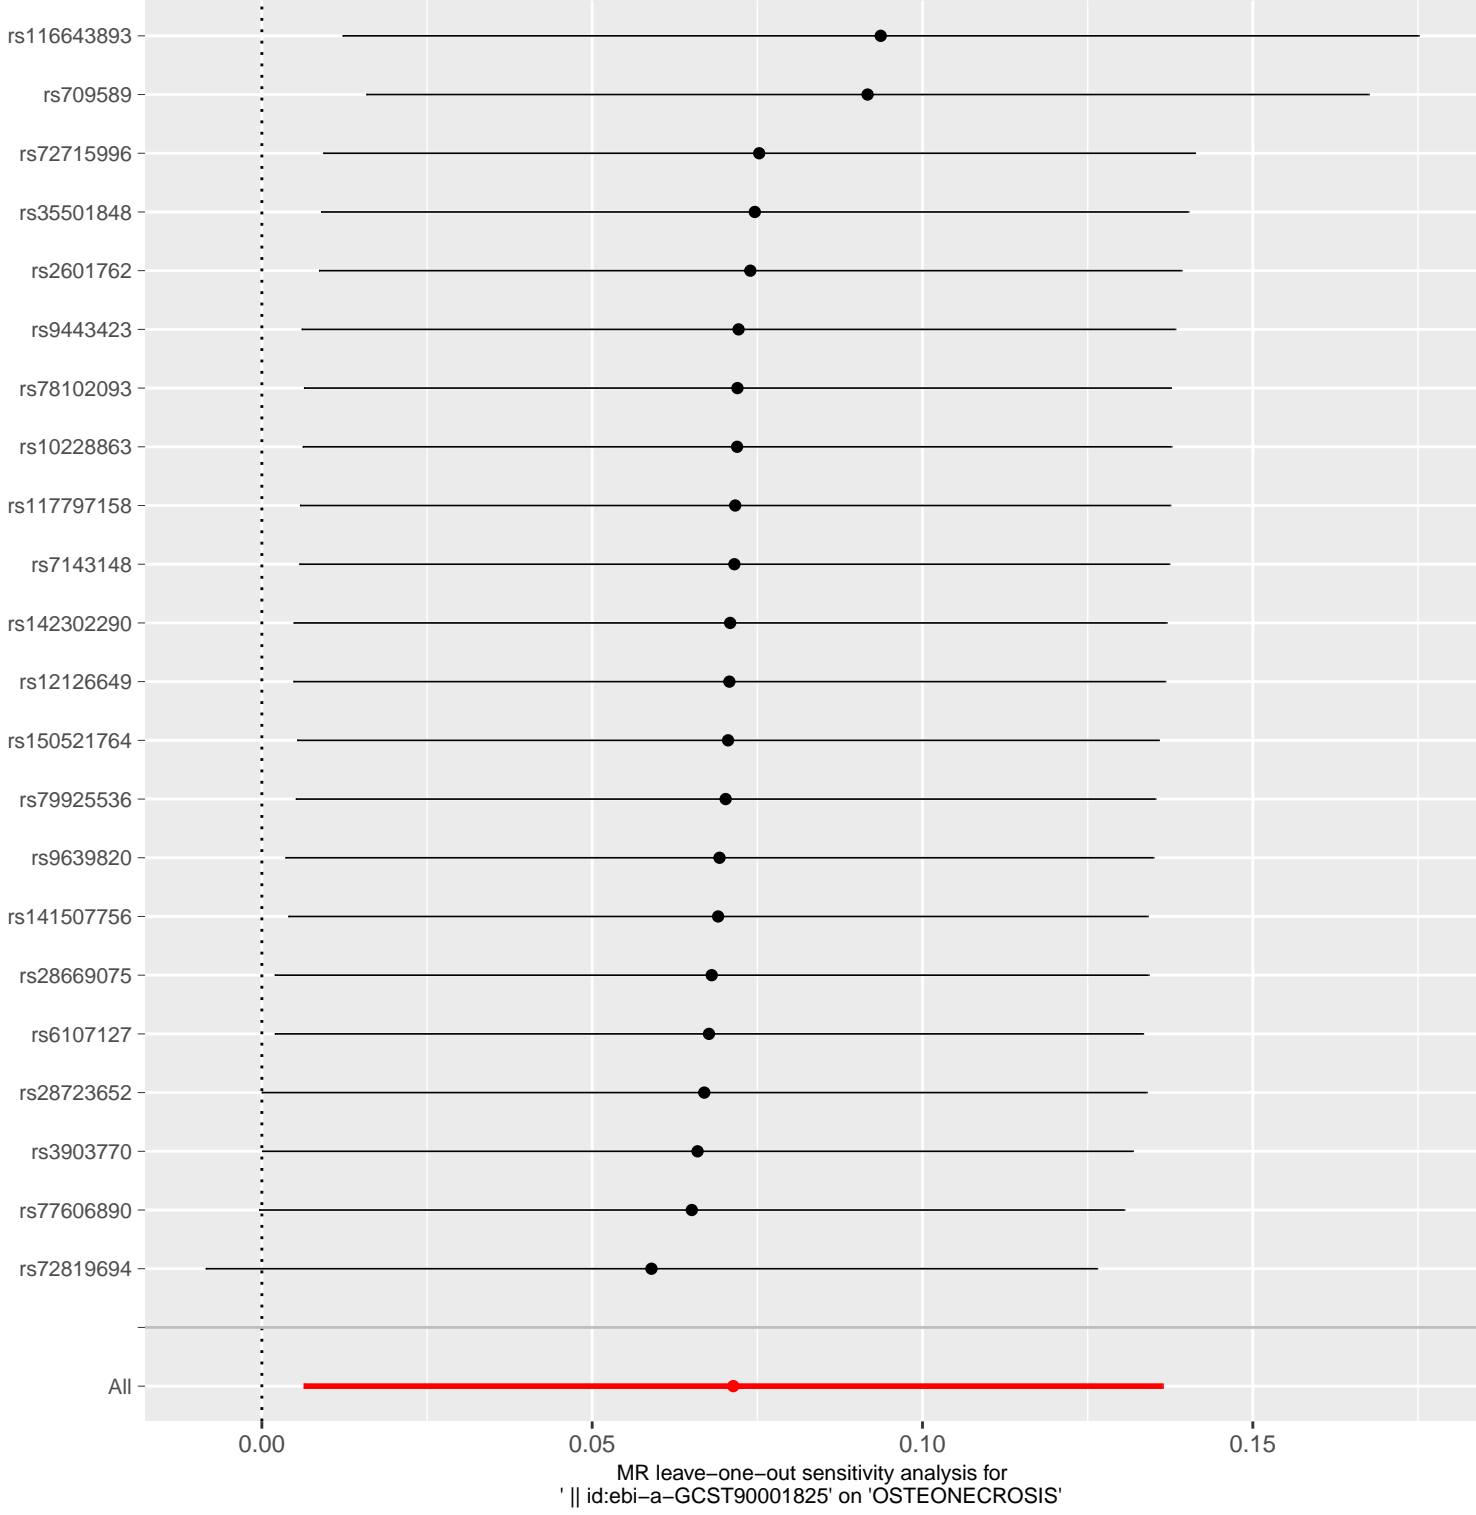

### MR Test

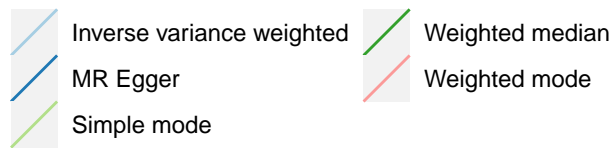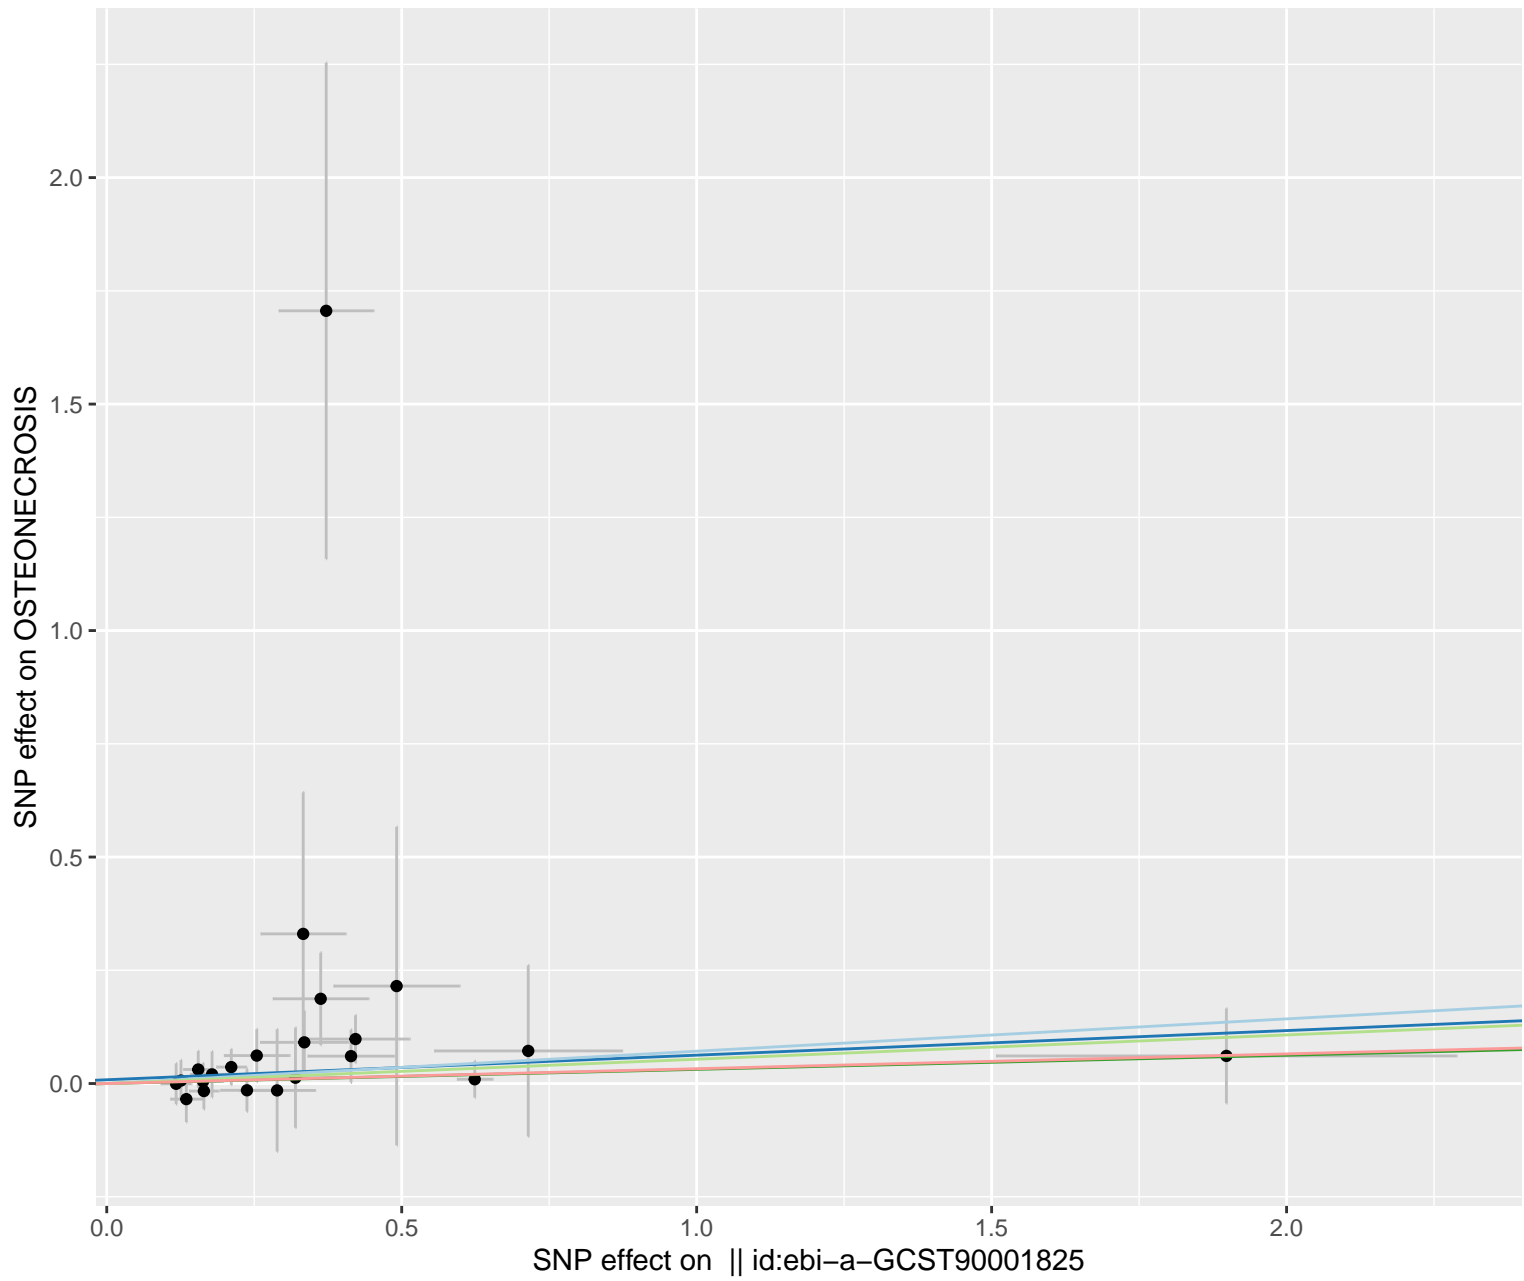

### MR Method

- Inverse variance weighted
- MR Egger

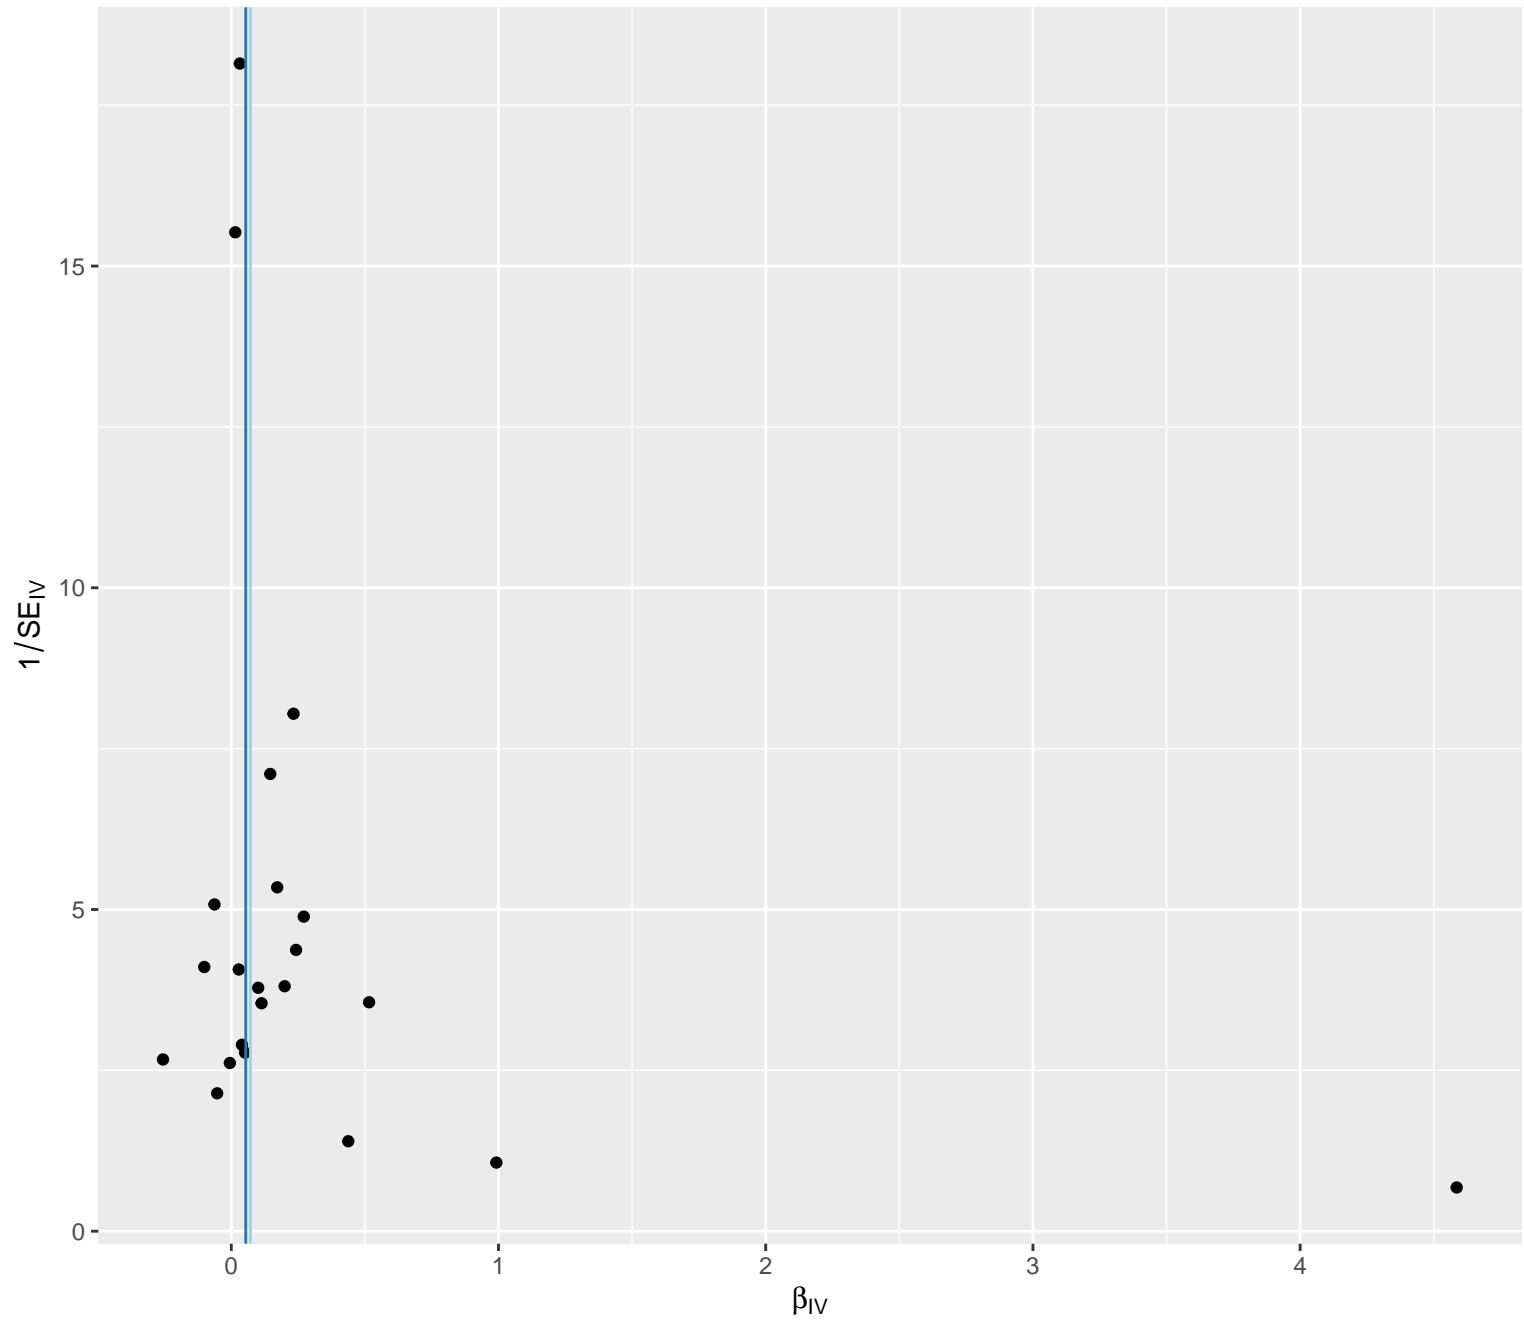

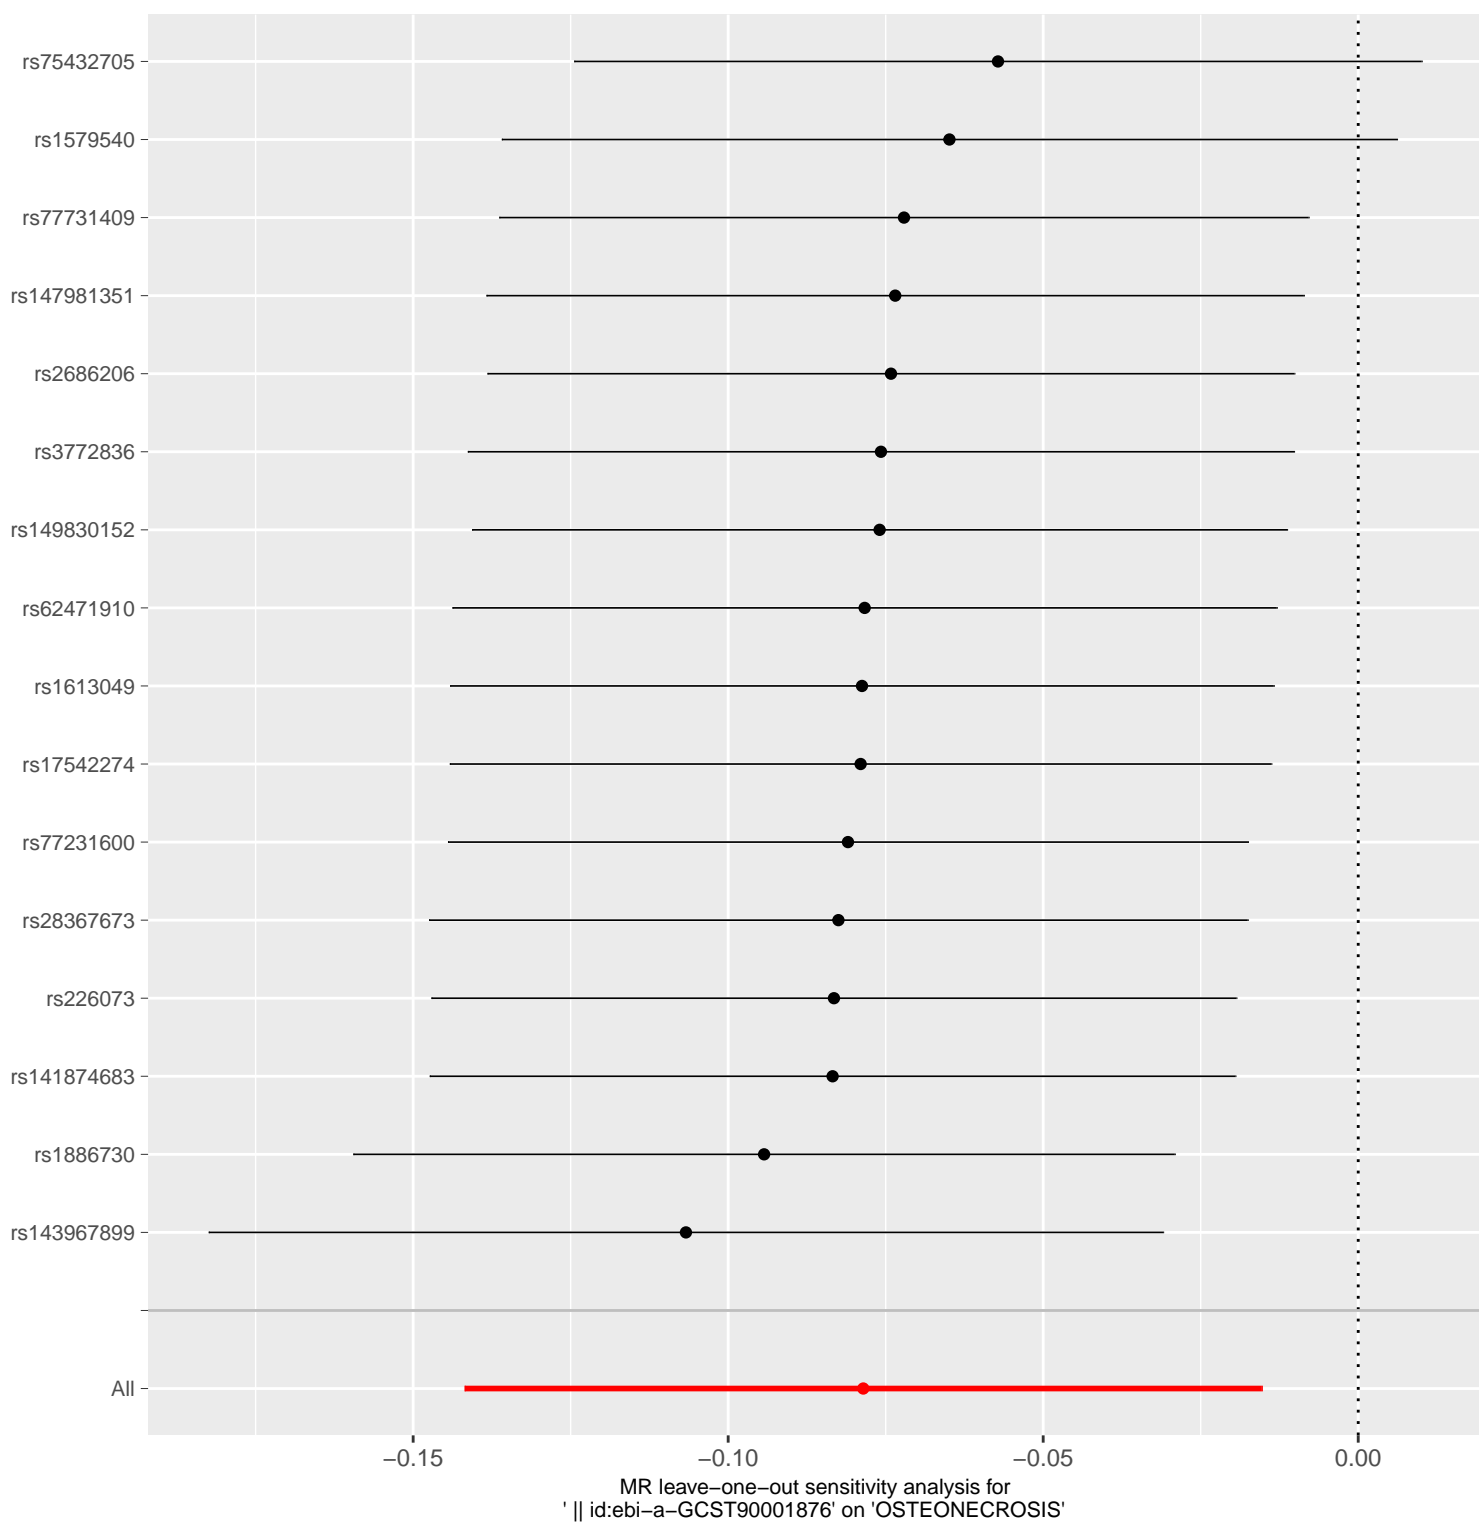

### MR Test

- Inverse variance weighted
- MR Egger
- Simple mode
- Weighted median
- Weighted mode

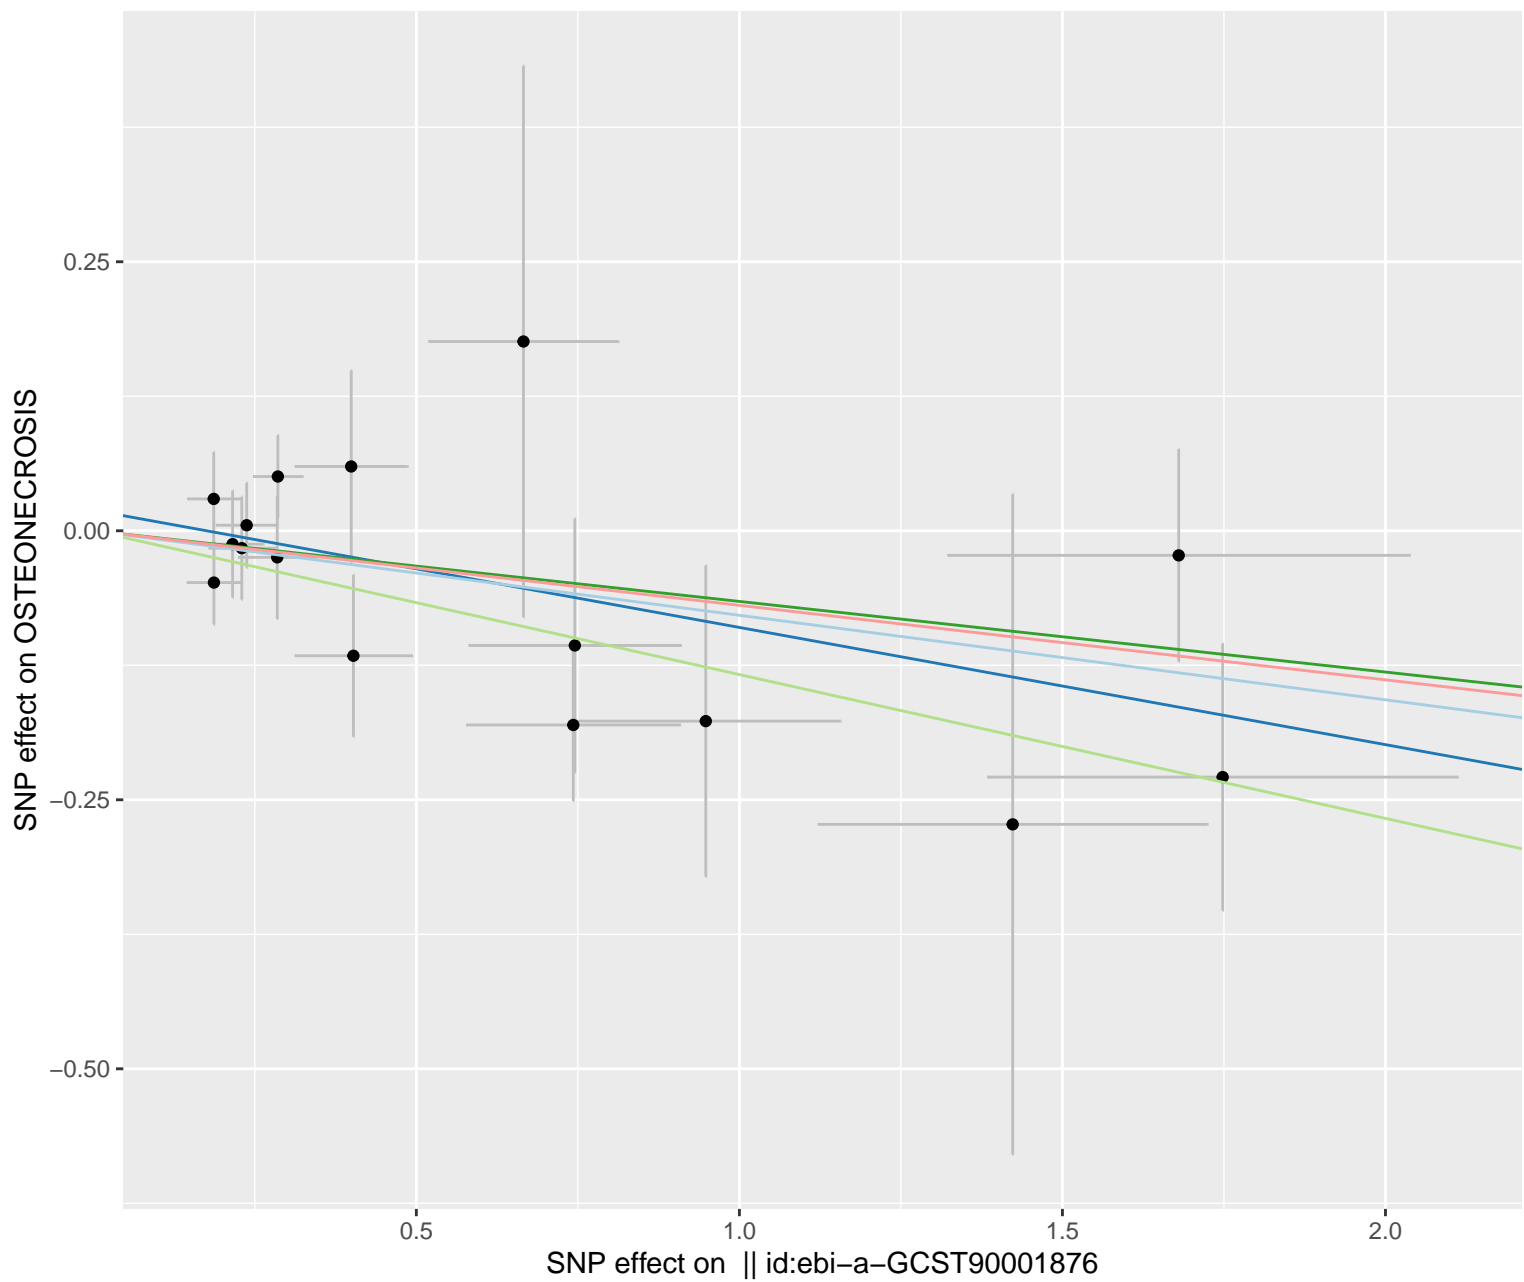

MR Method

- Inverse variance weighted
- MR Egger

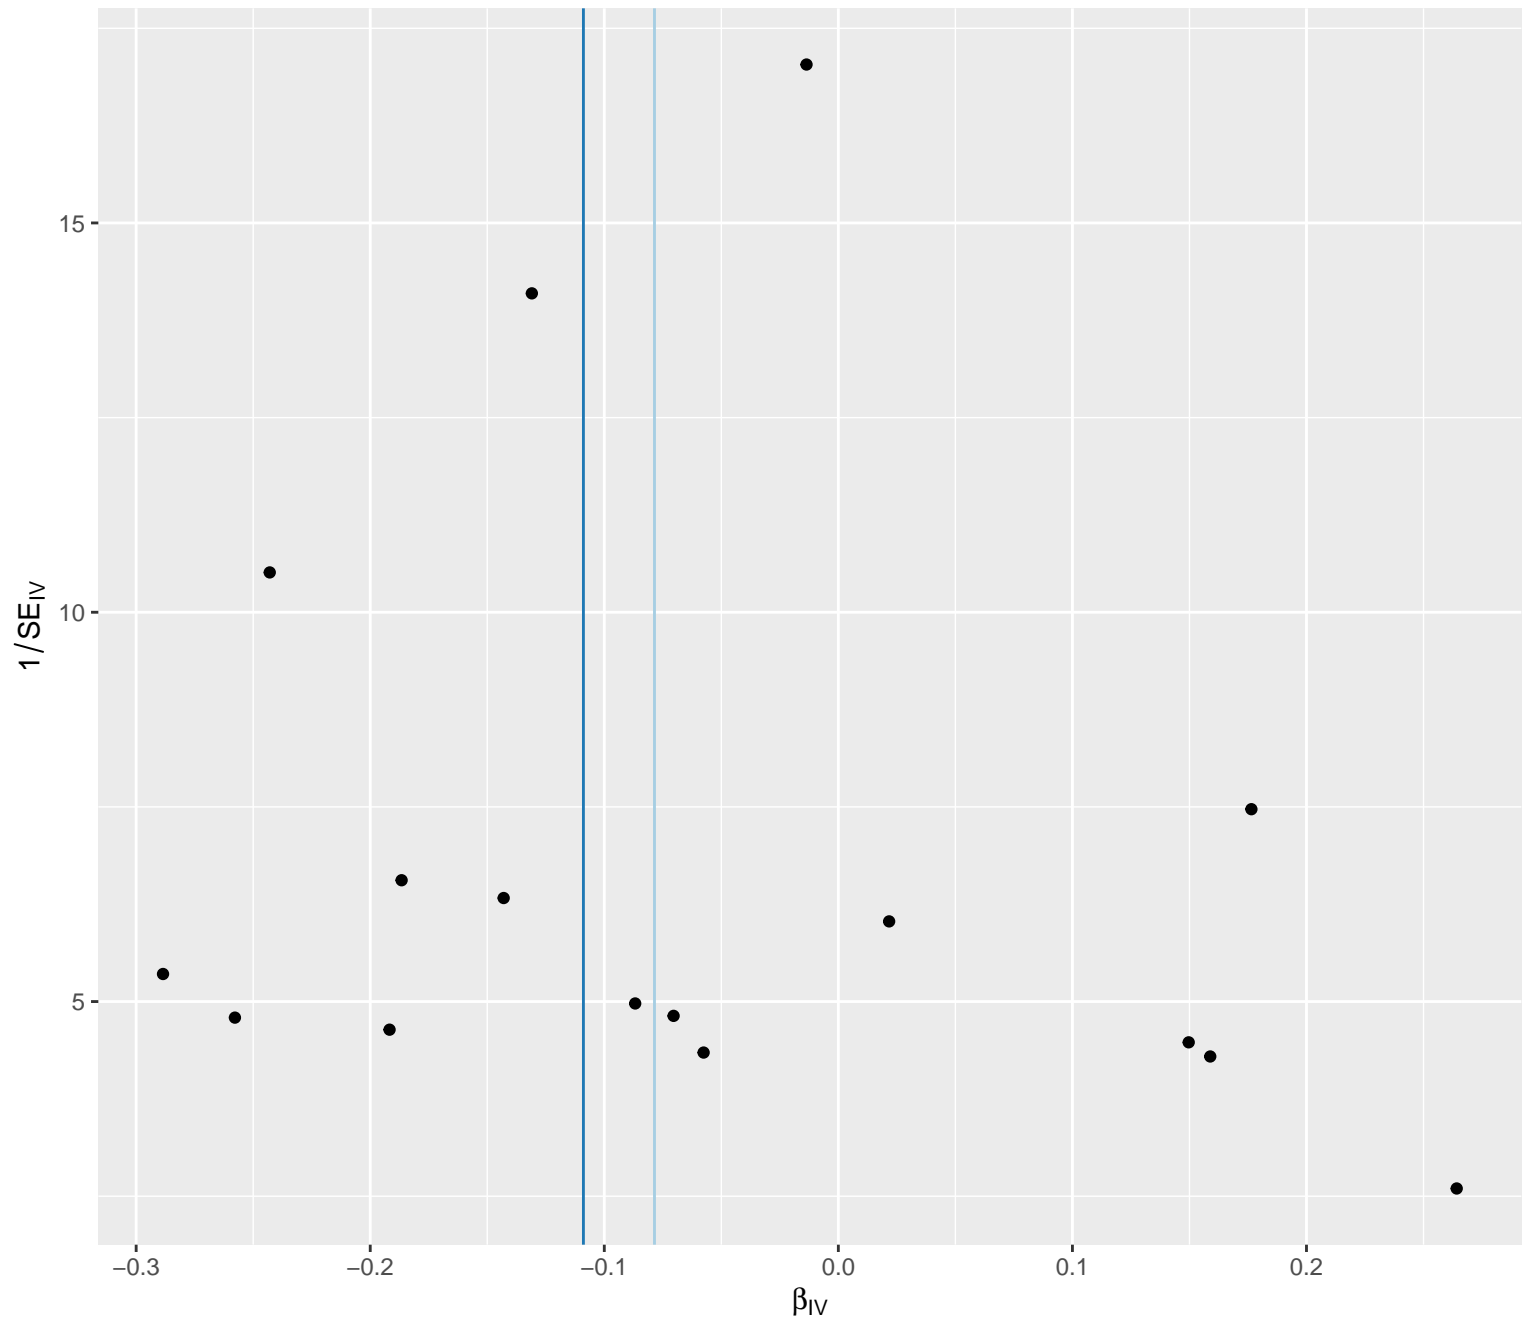

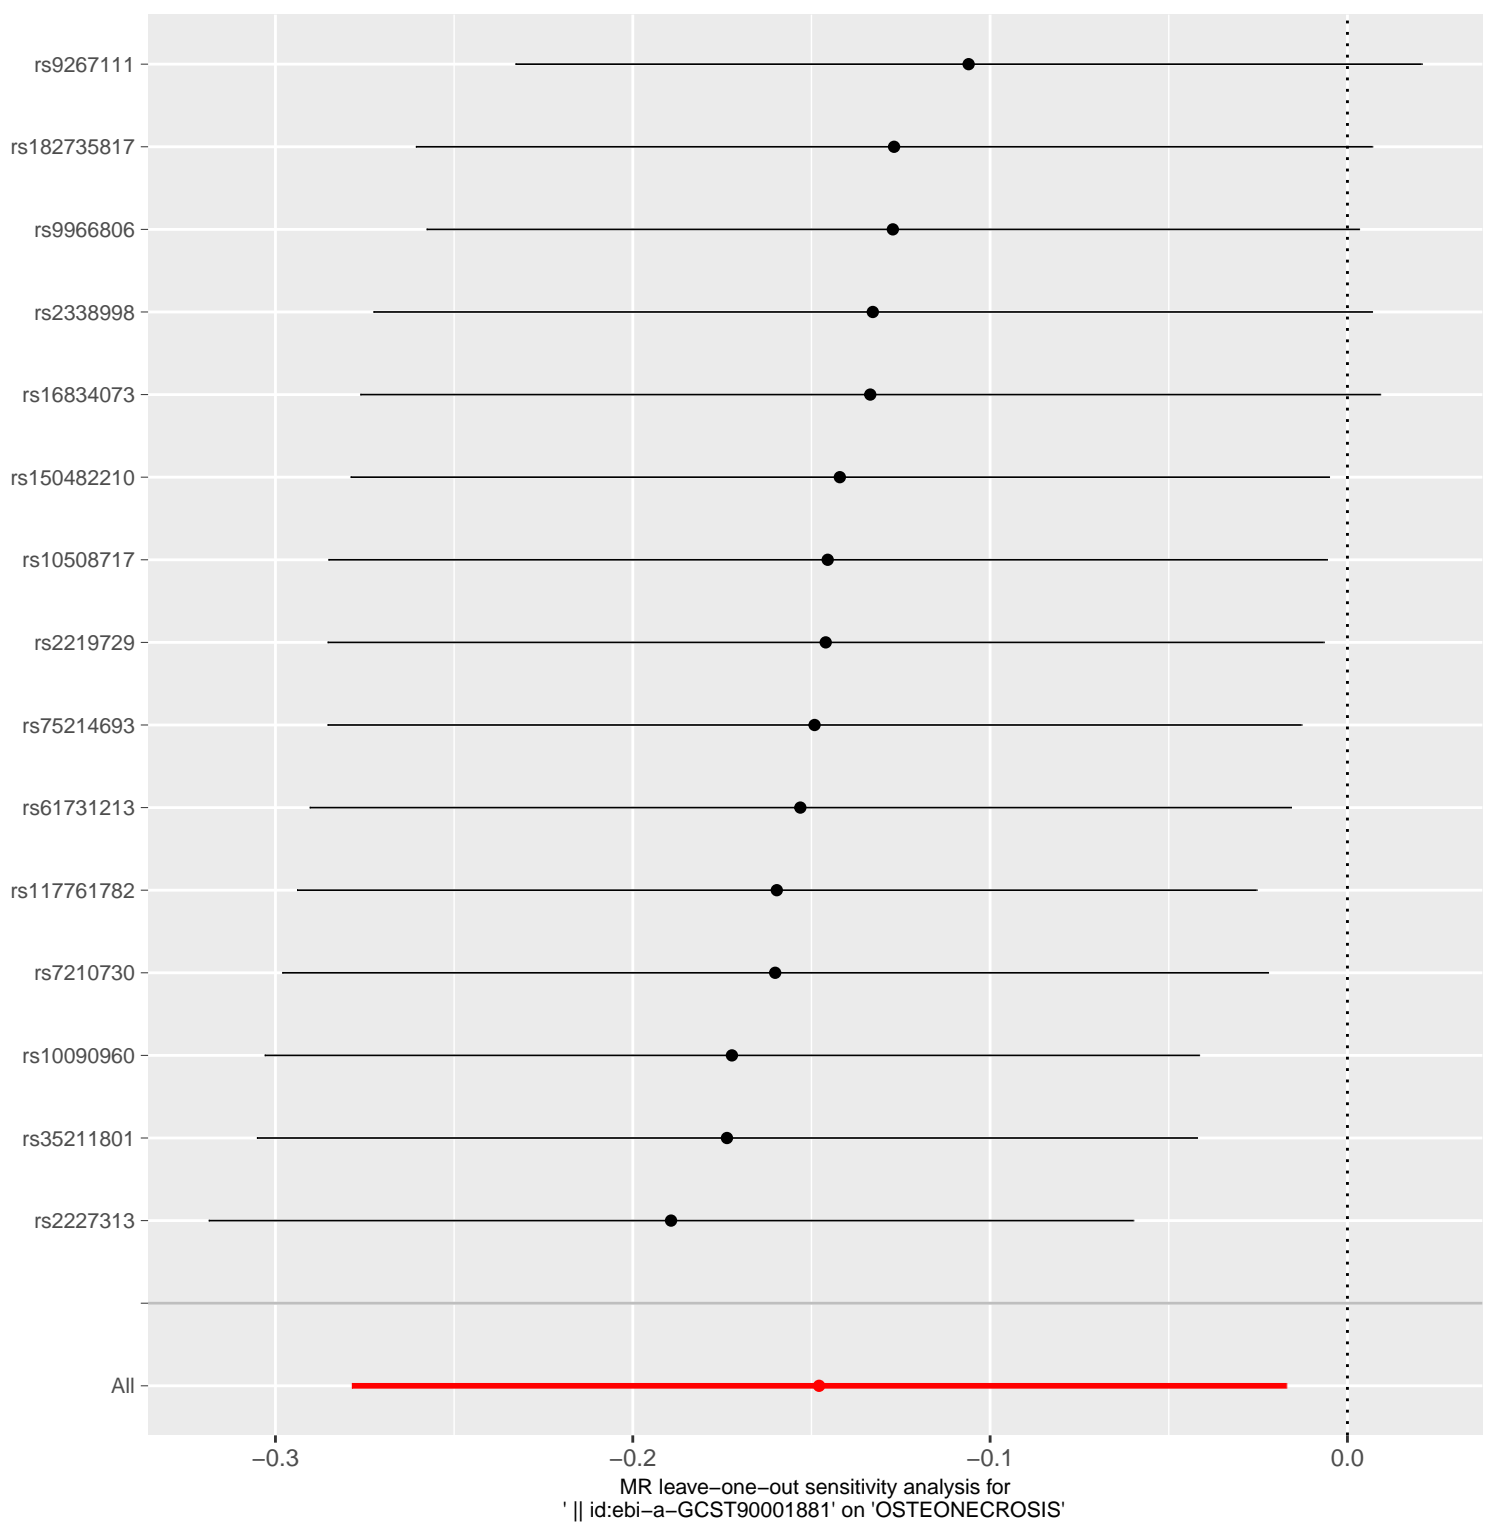

### MR Test

- Inverse variance weighted
- MR Egger
- Simple mode
- Weighted median
- Weighted mode

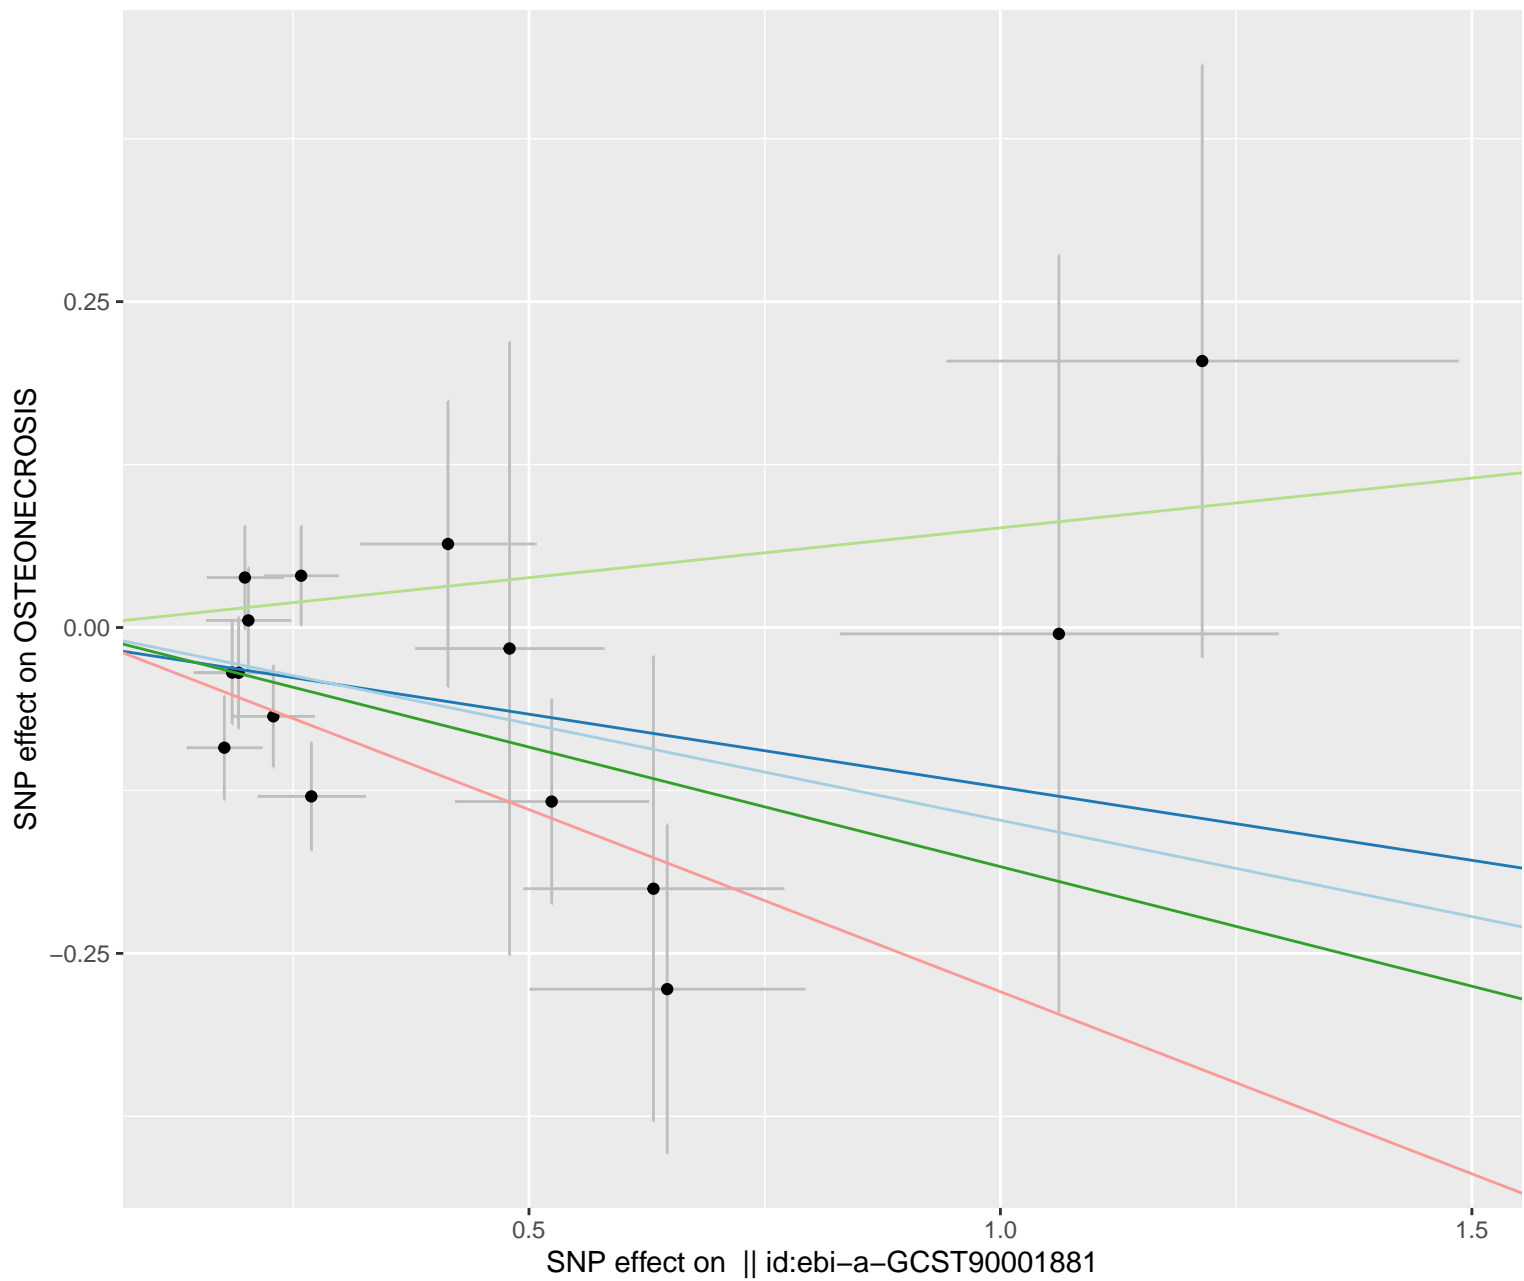



### MR Method

- Inverse variance weighted
- MR Egger

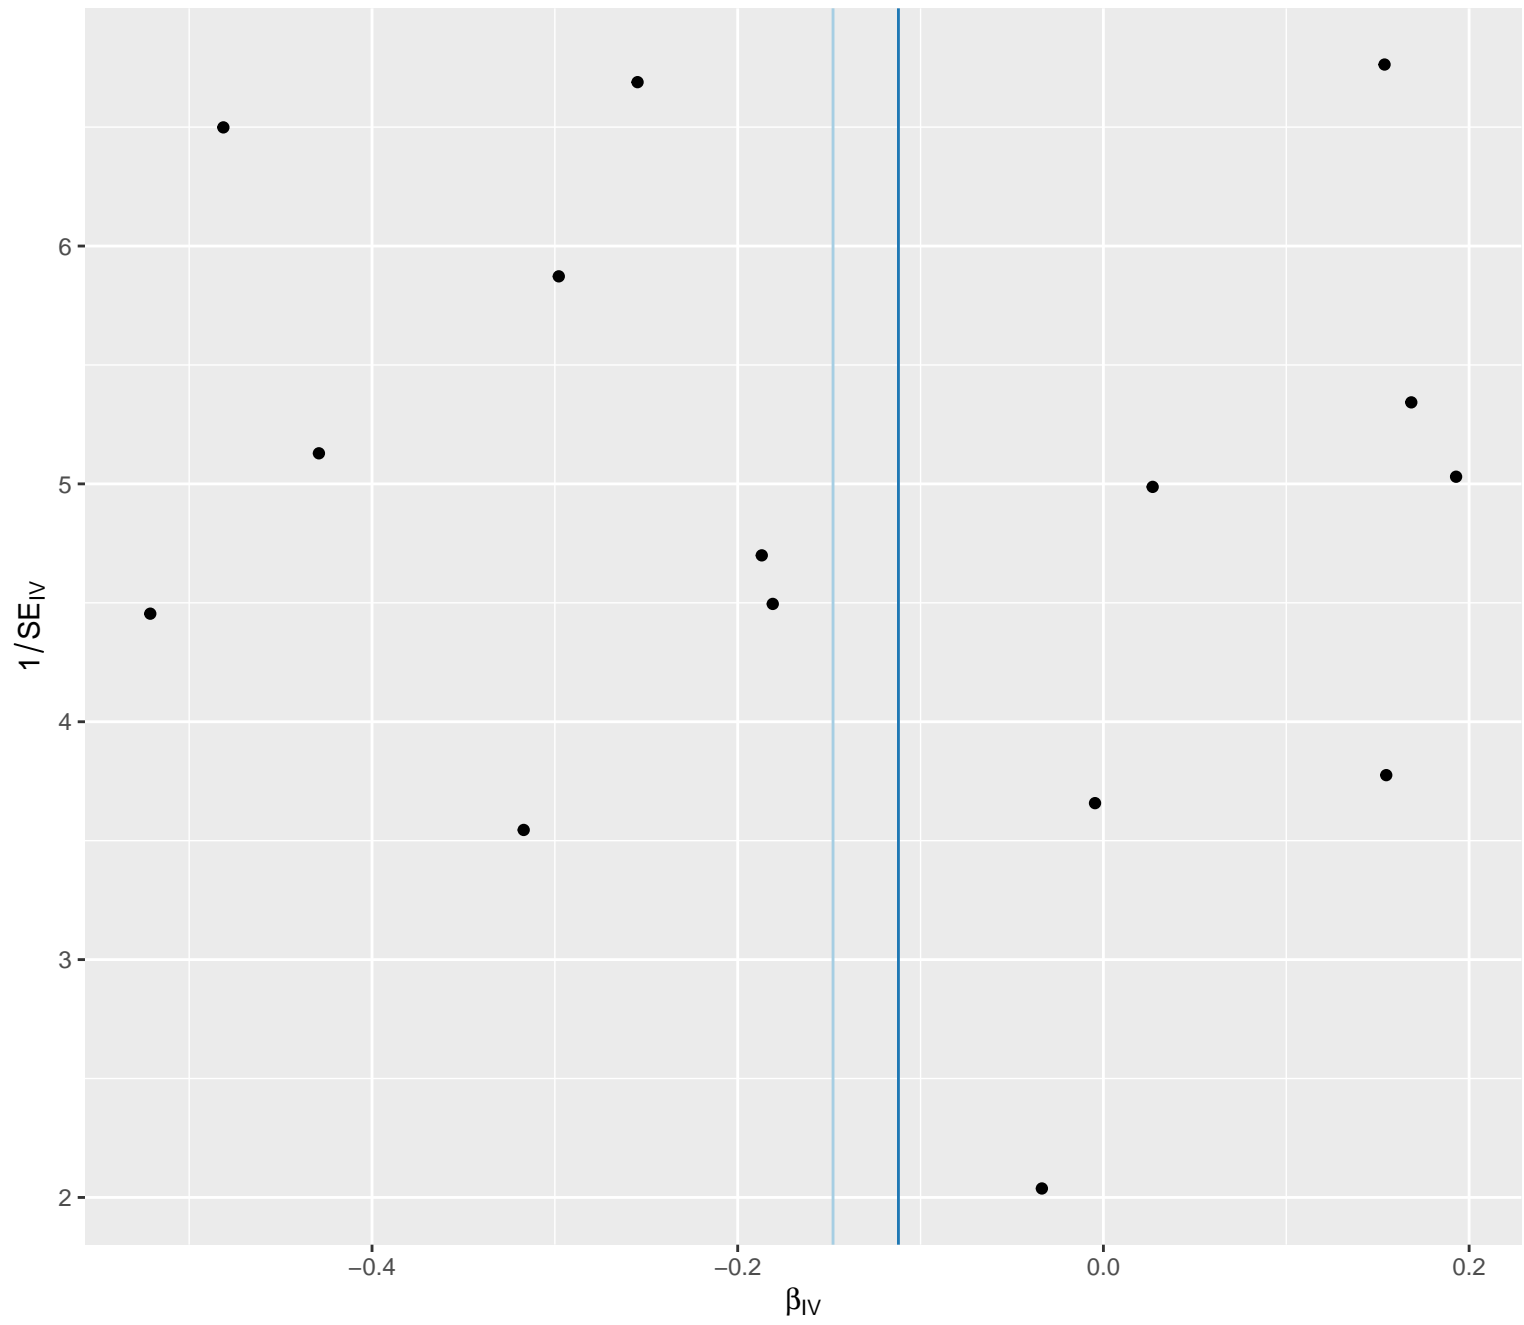

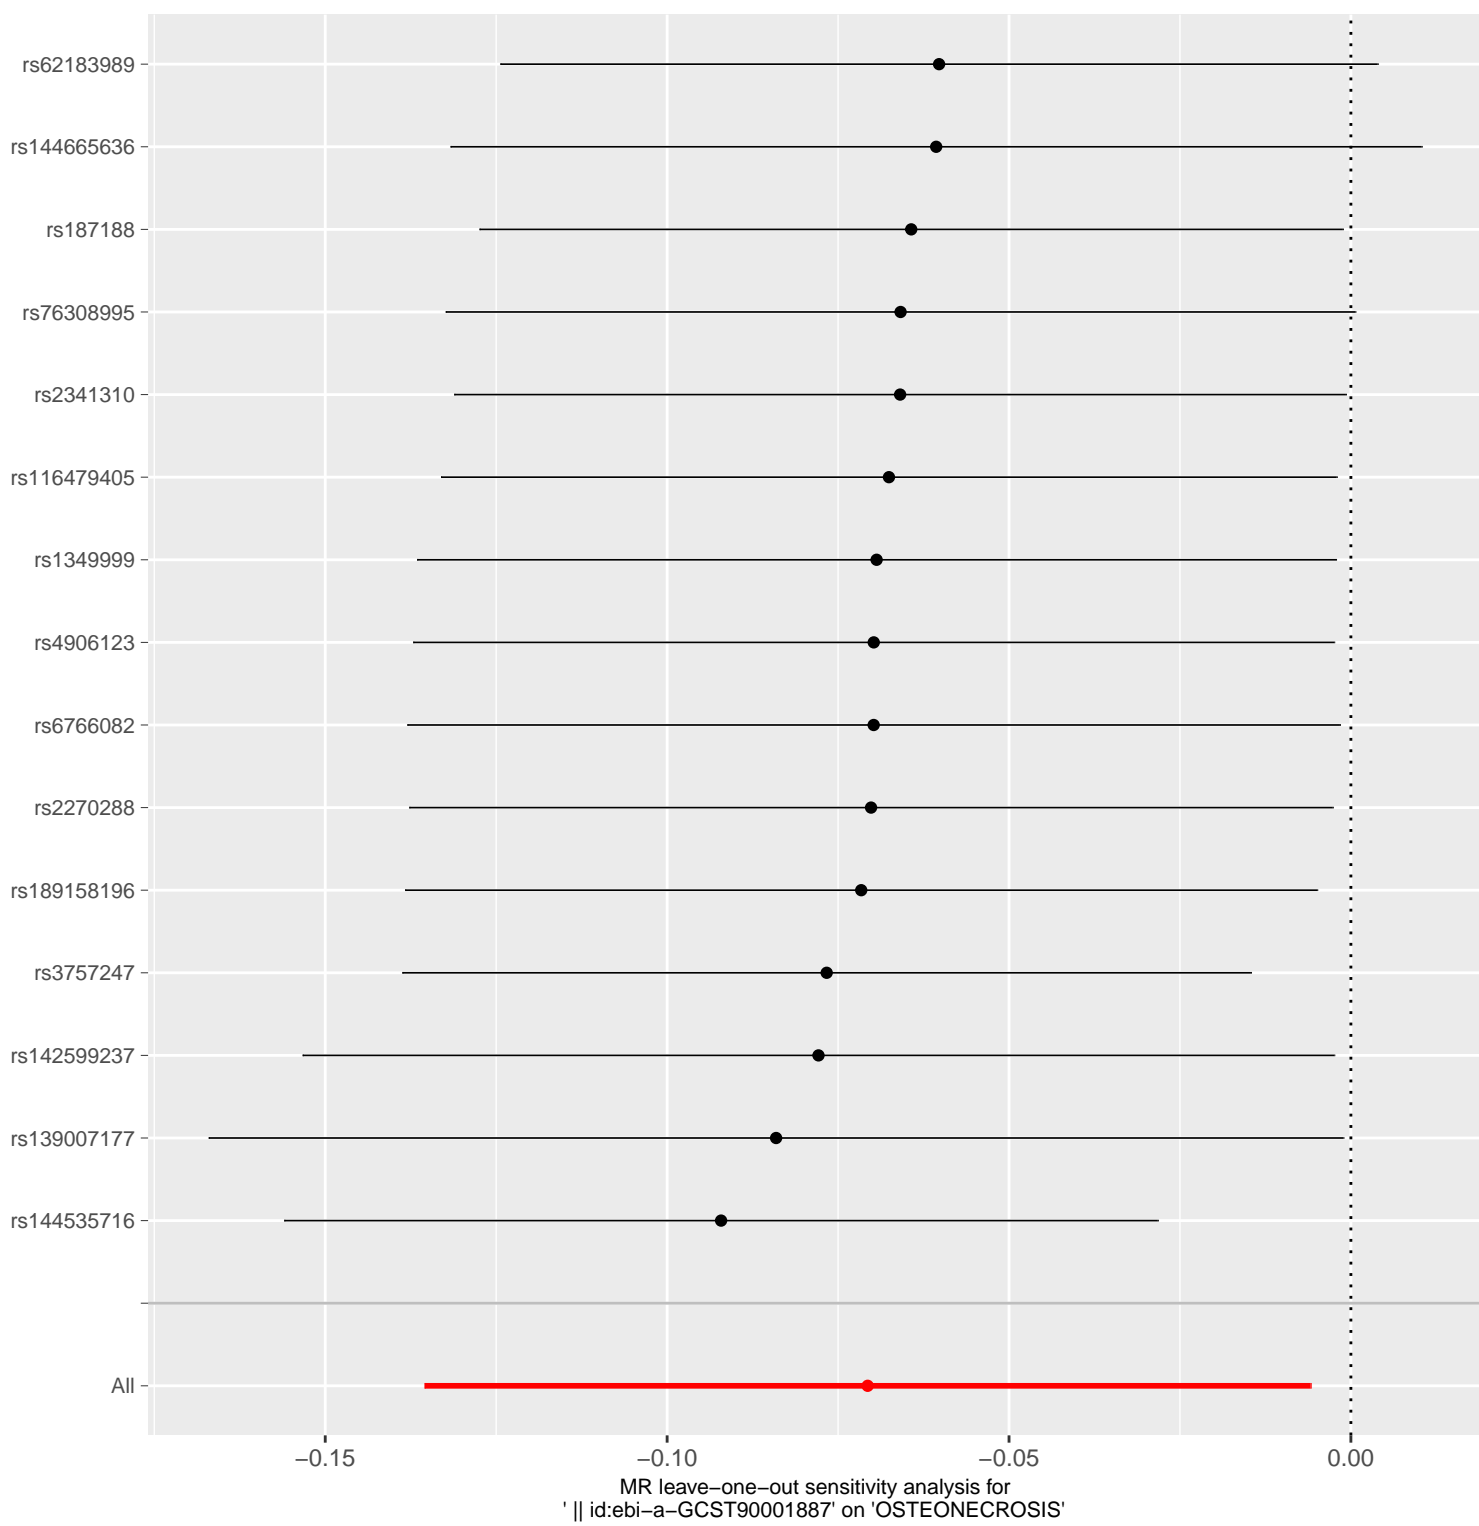

MR Test

- Inverse variance weighted
- MR Egger
- Simple mode
- Weighted median
- Weighted mode

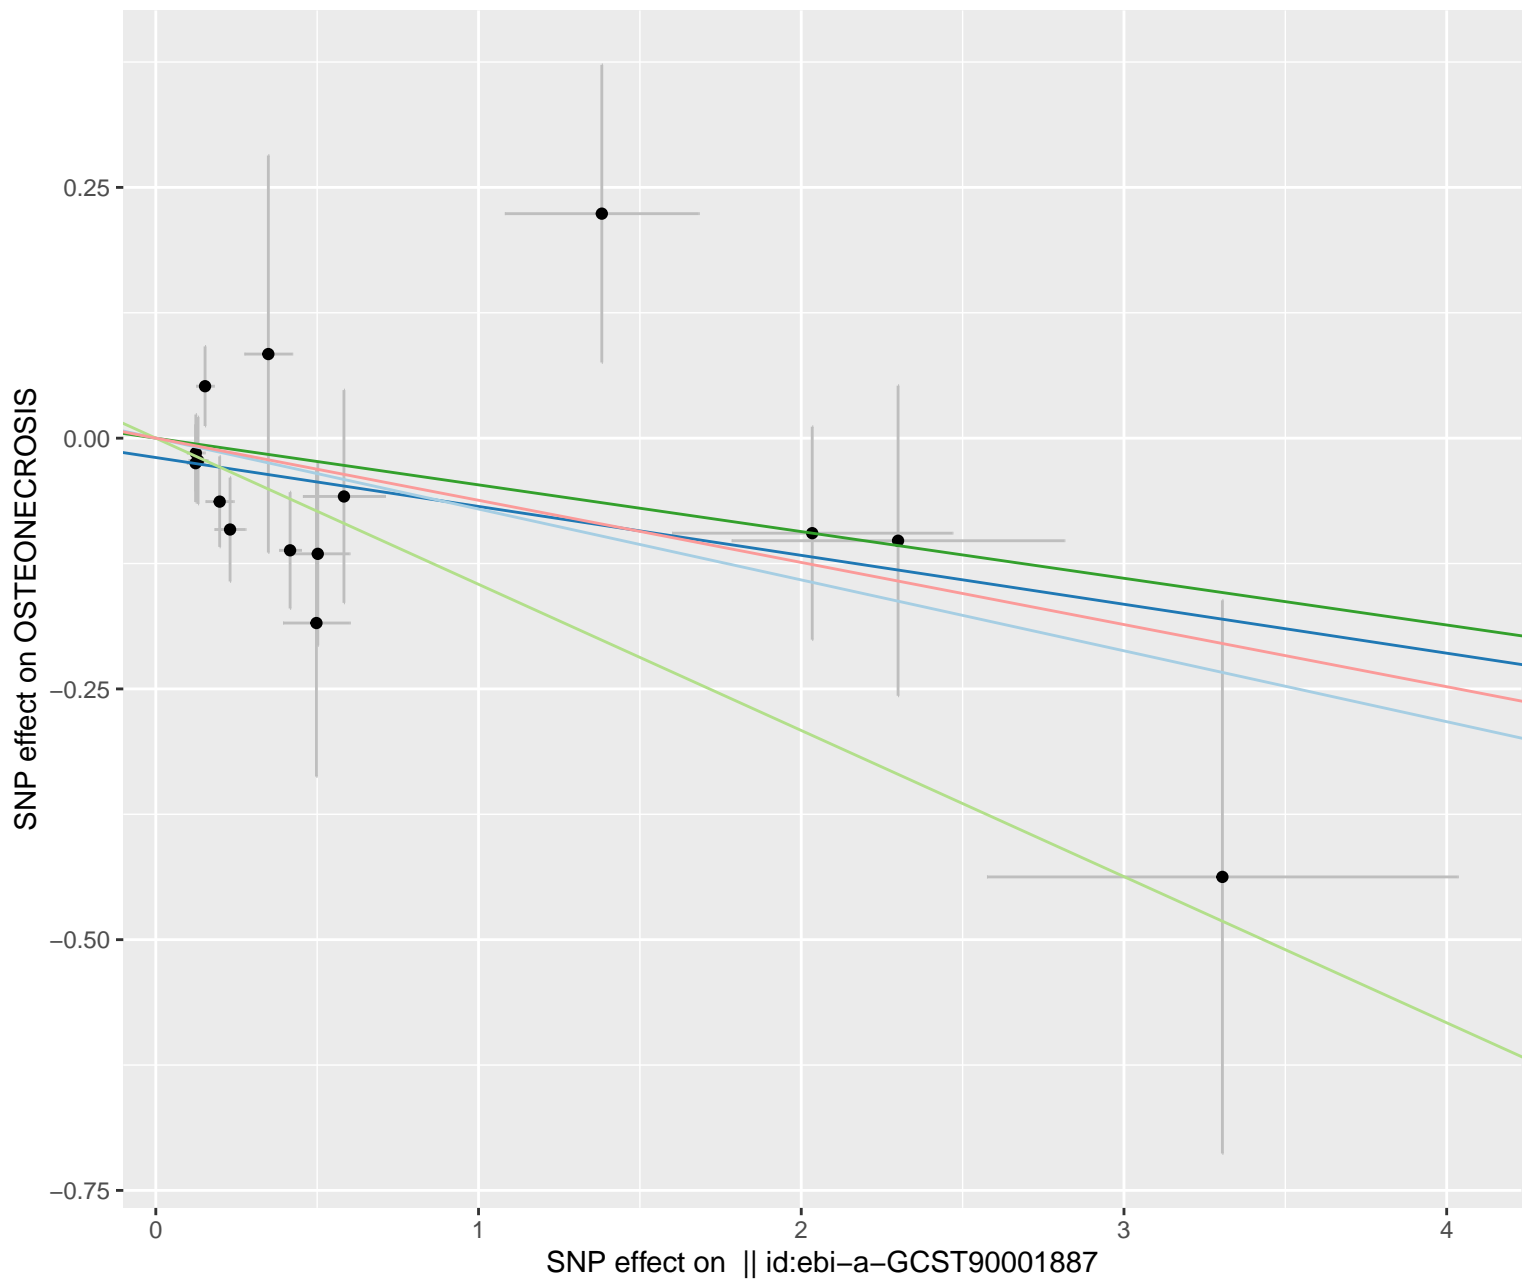

MR Method

- Inverse variance weighted
- MR Egger

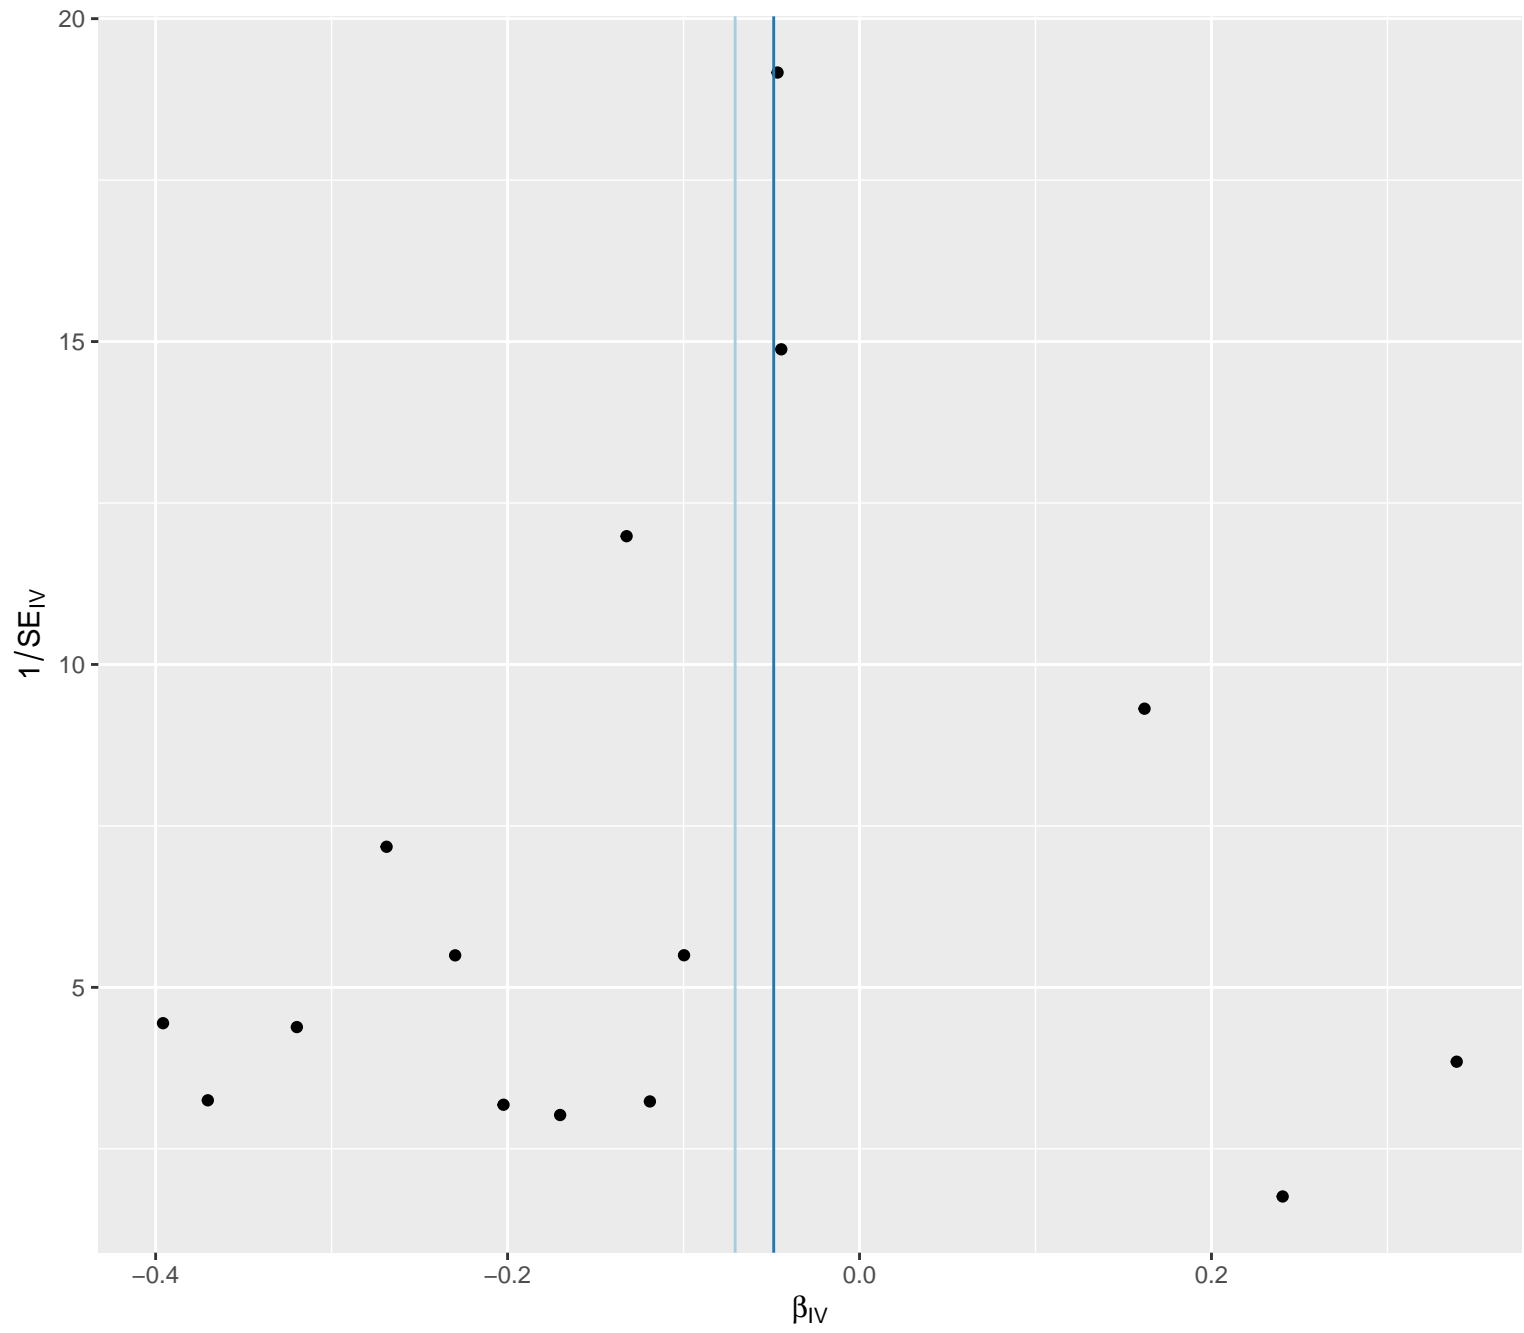

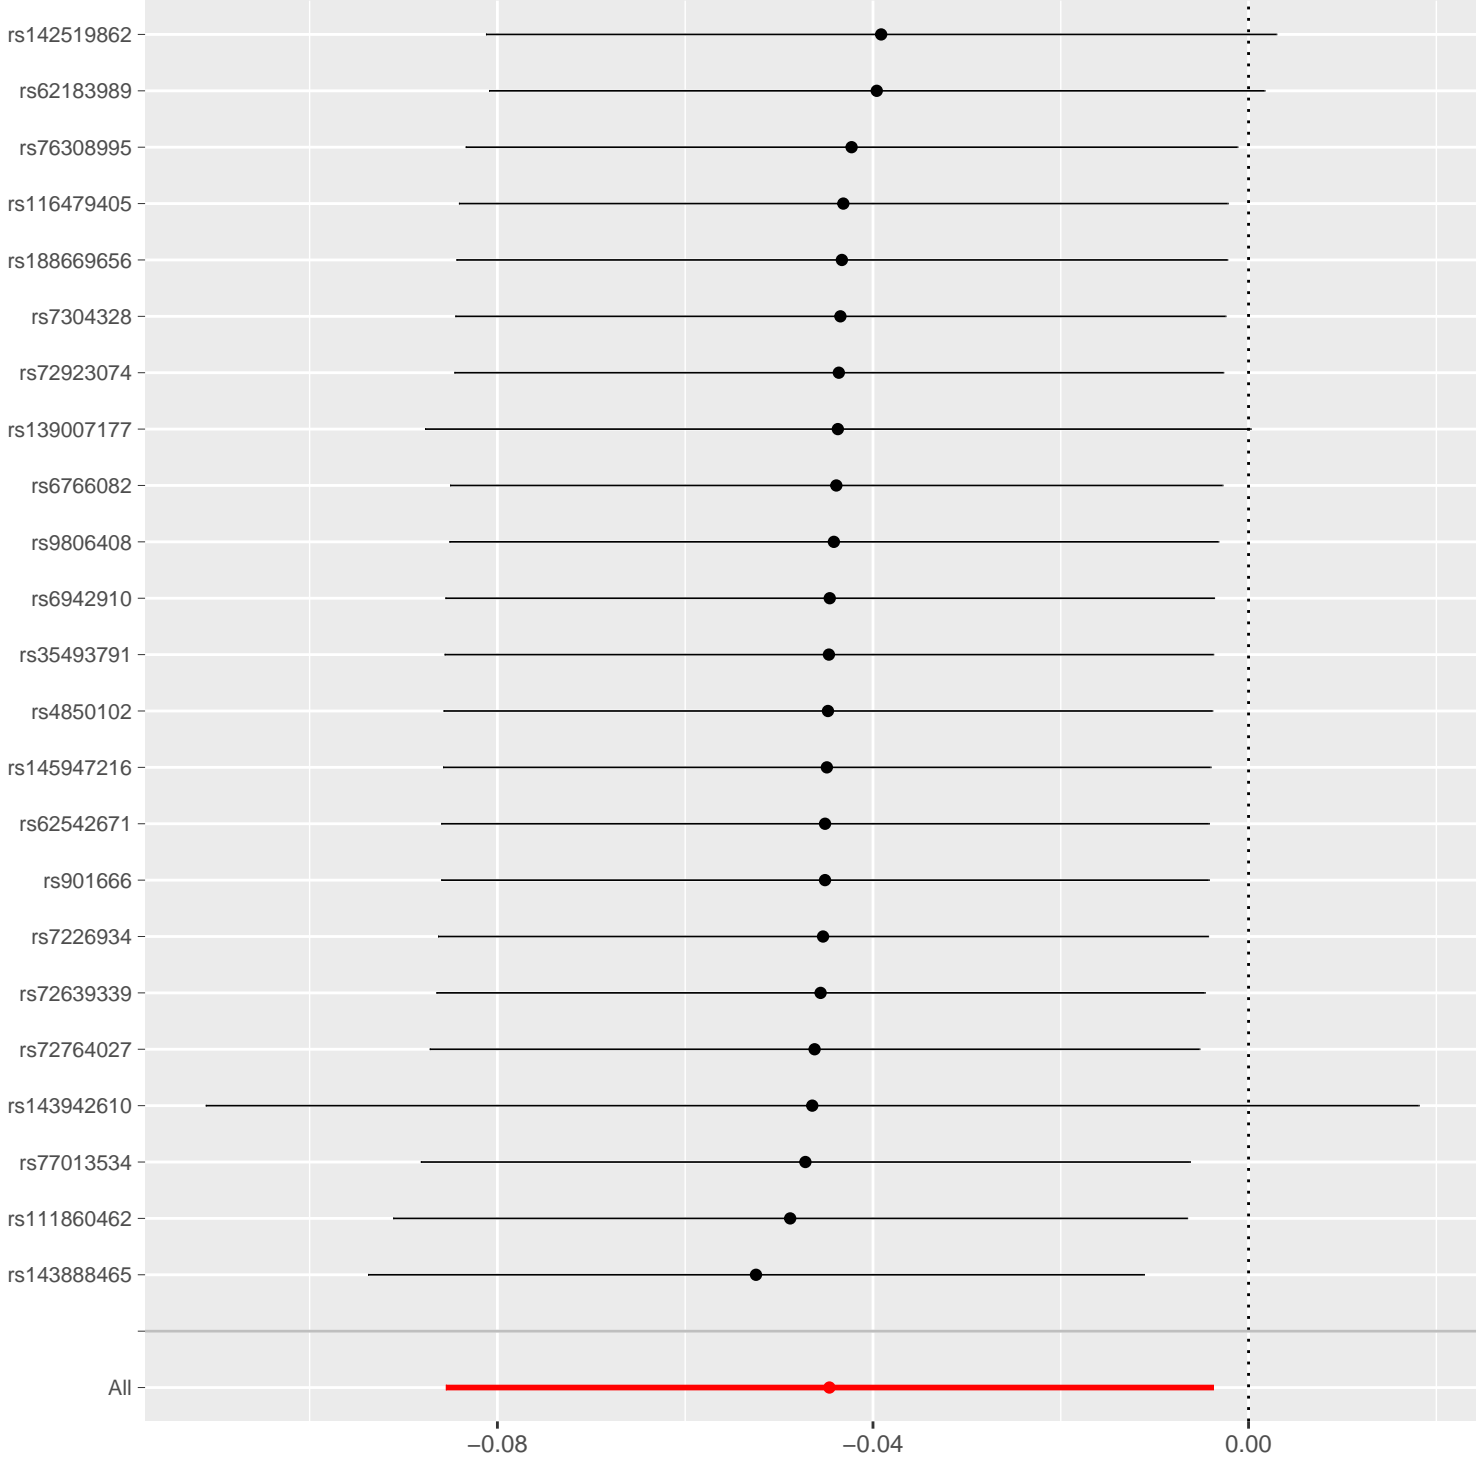

MR Test

- Inverse variance weighted
- MR Egger
- Simple mode
- Weighted median
- Weighted mode

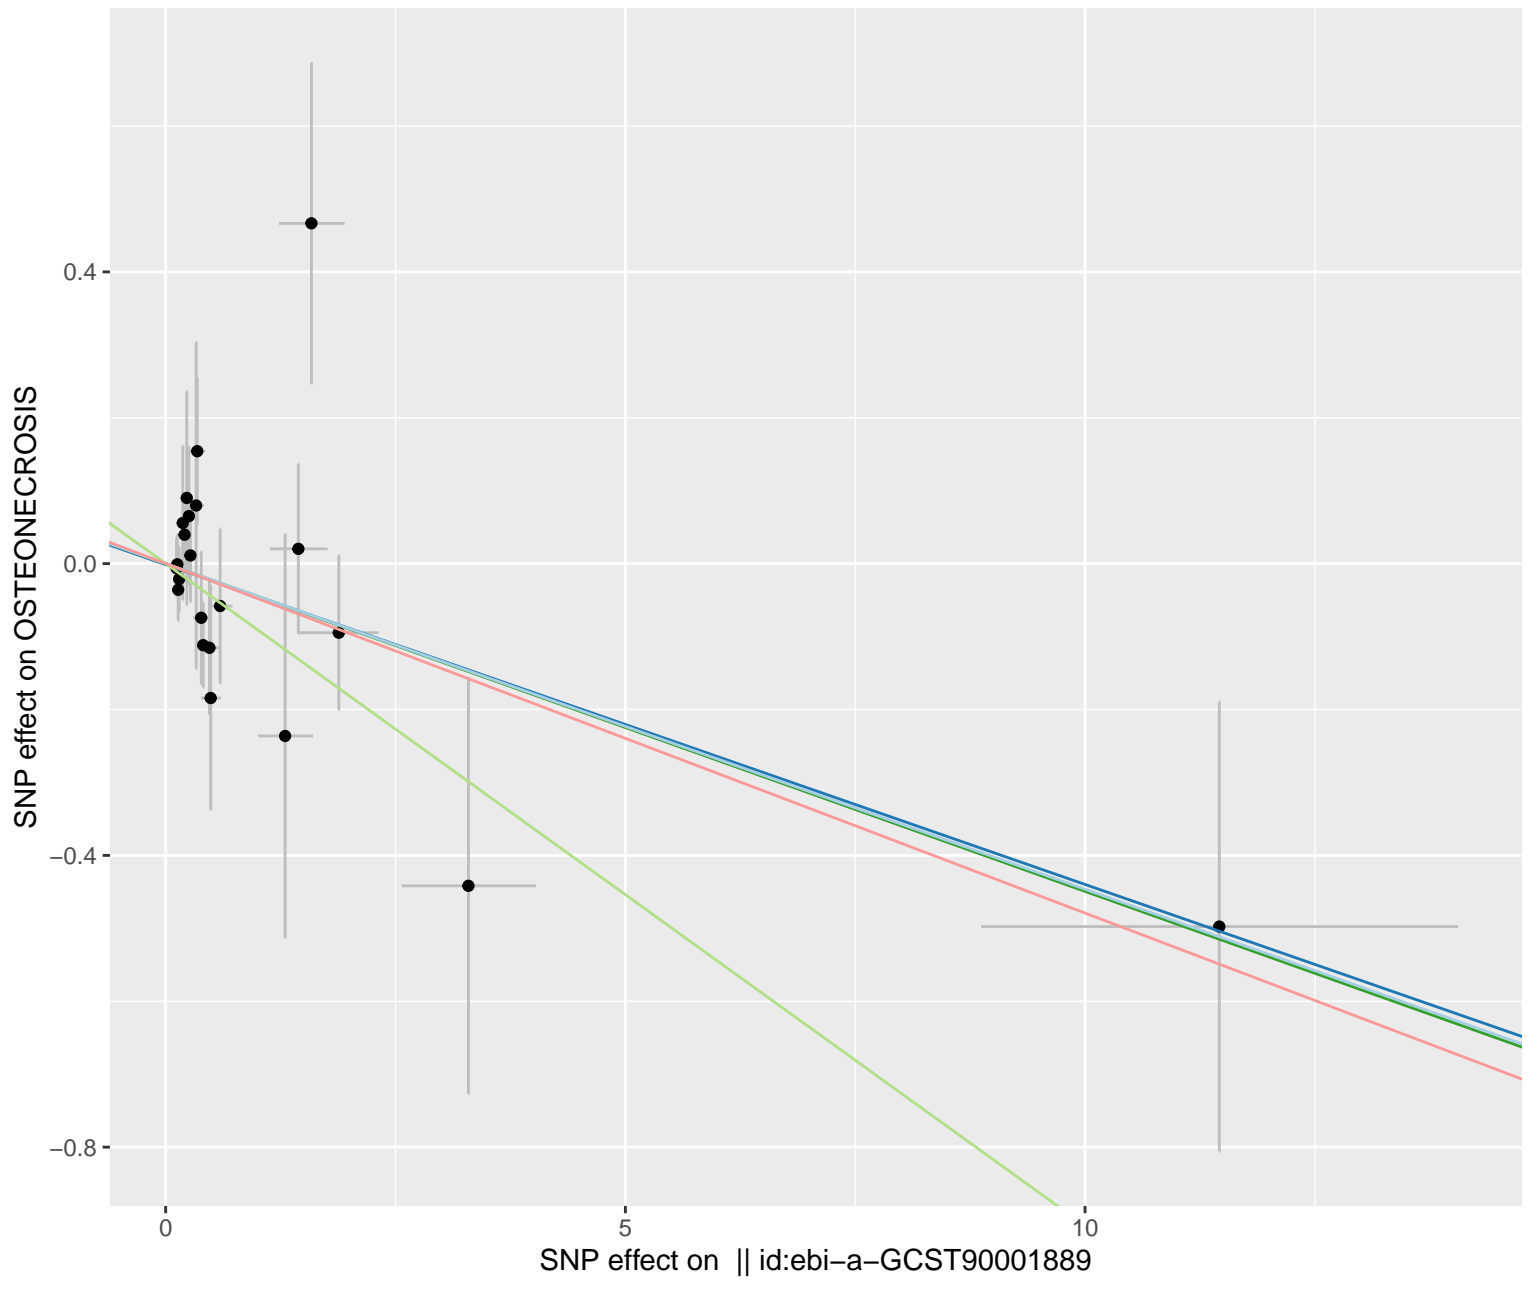

MR Method

- Inverse variance weighted
- MR Egger

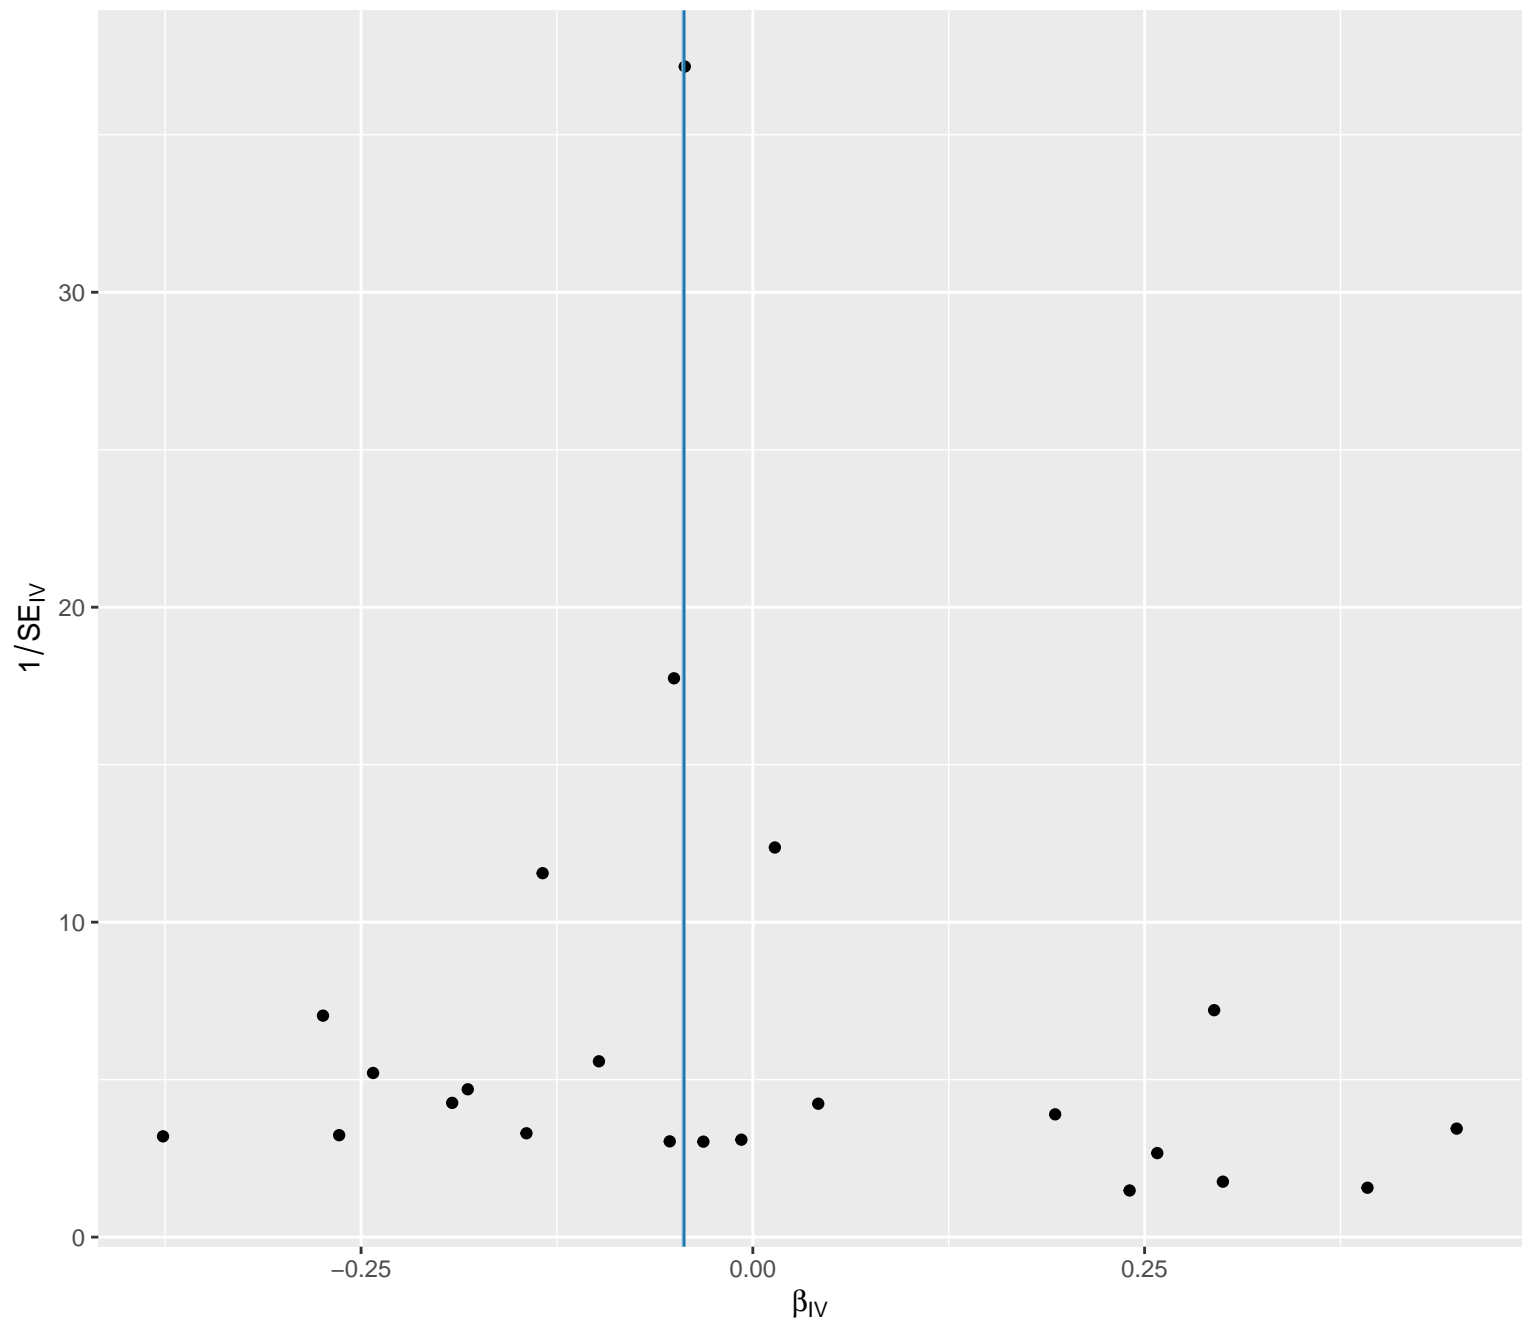

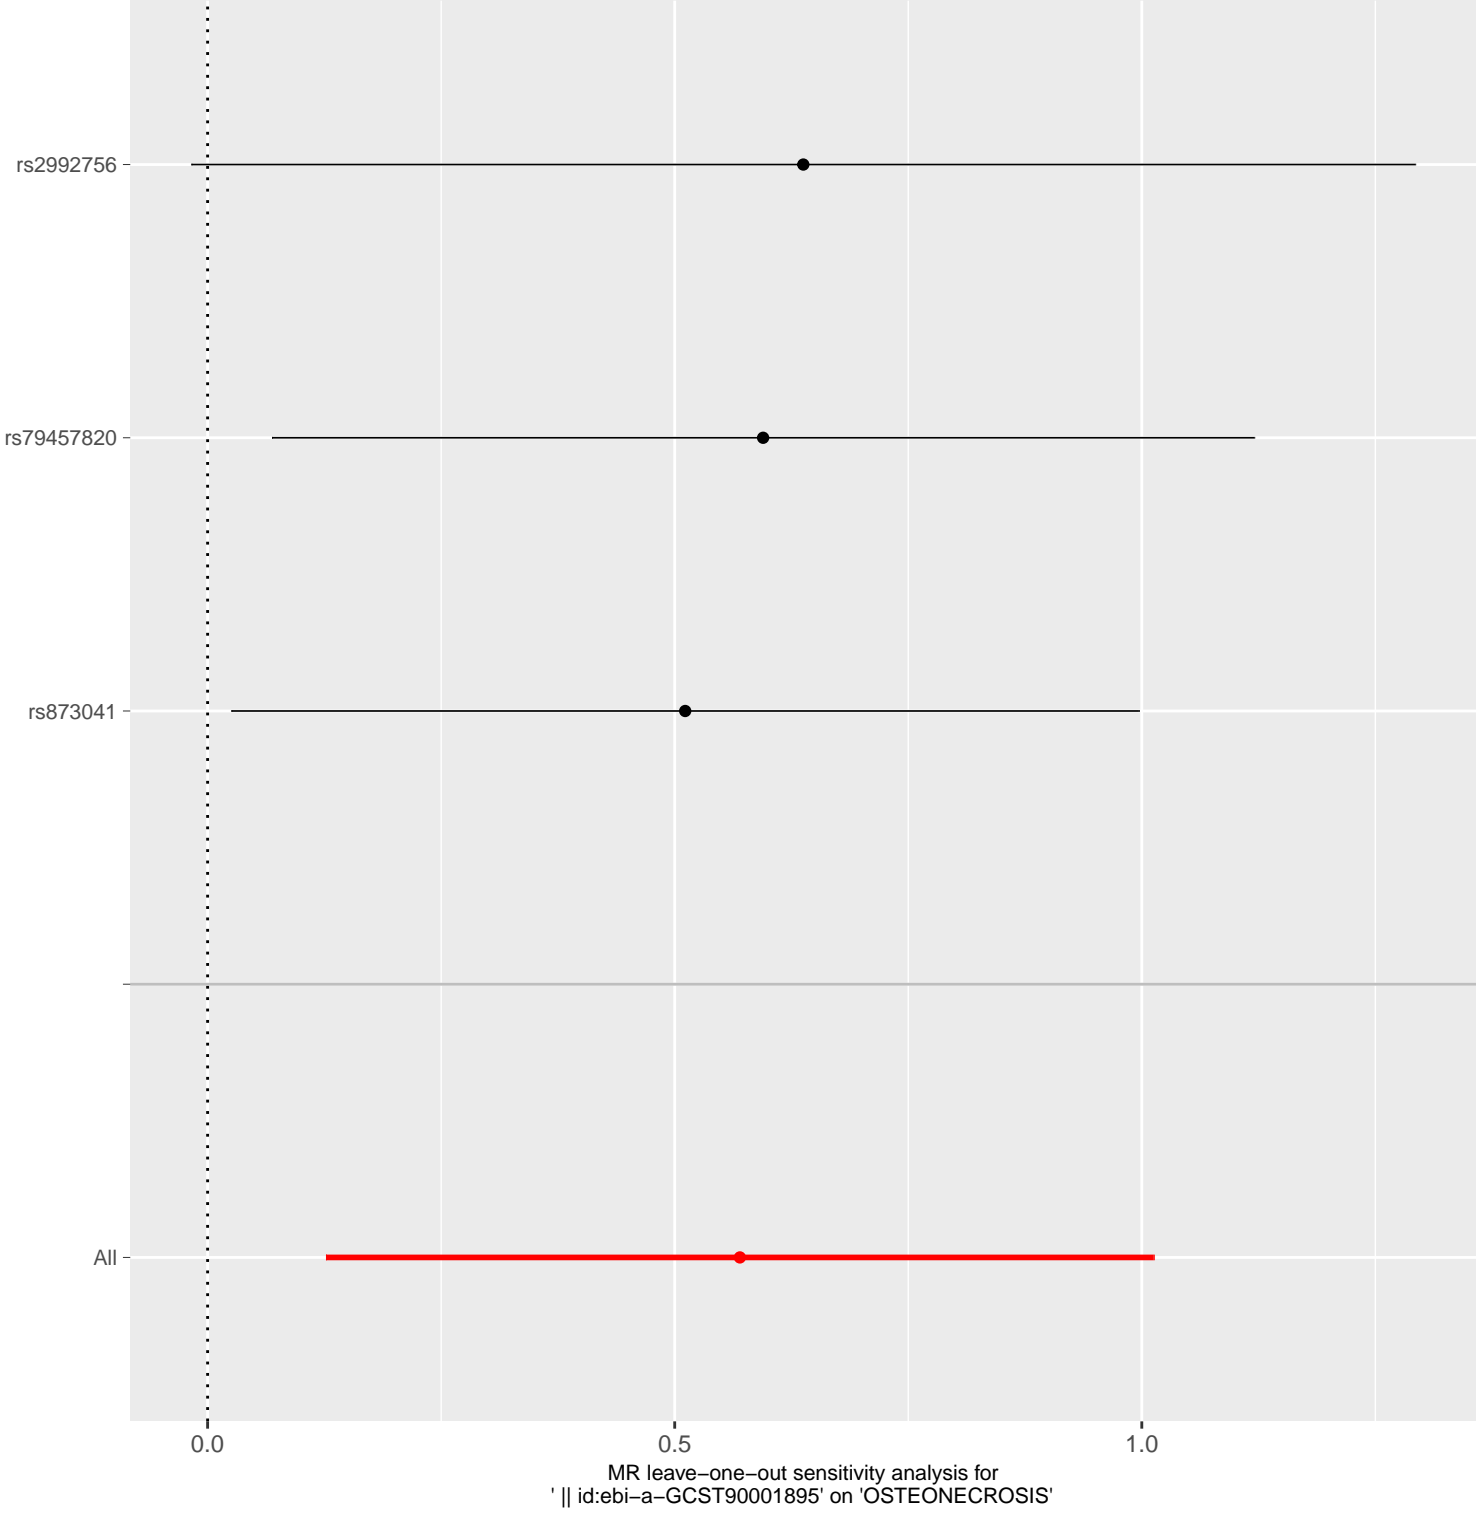



### MR Test

- Inverse variance weighted
- MR Egger
- Simple mode
- Weighted median
- Weighted mode

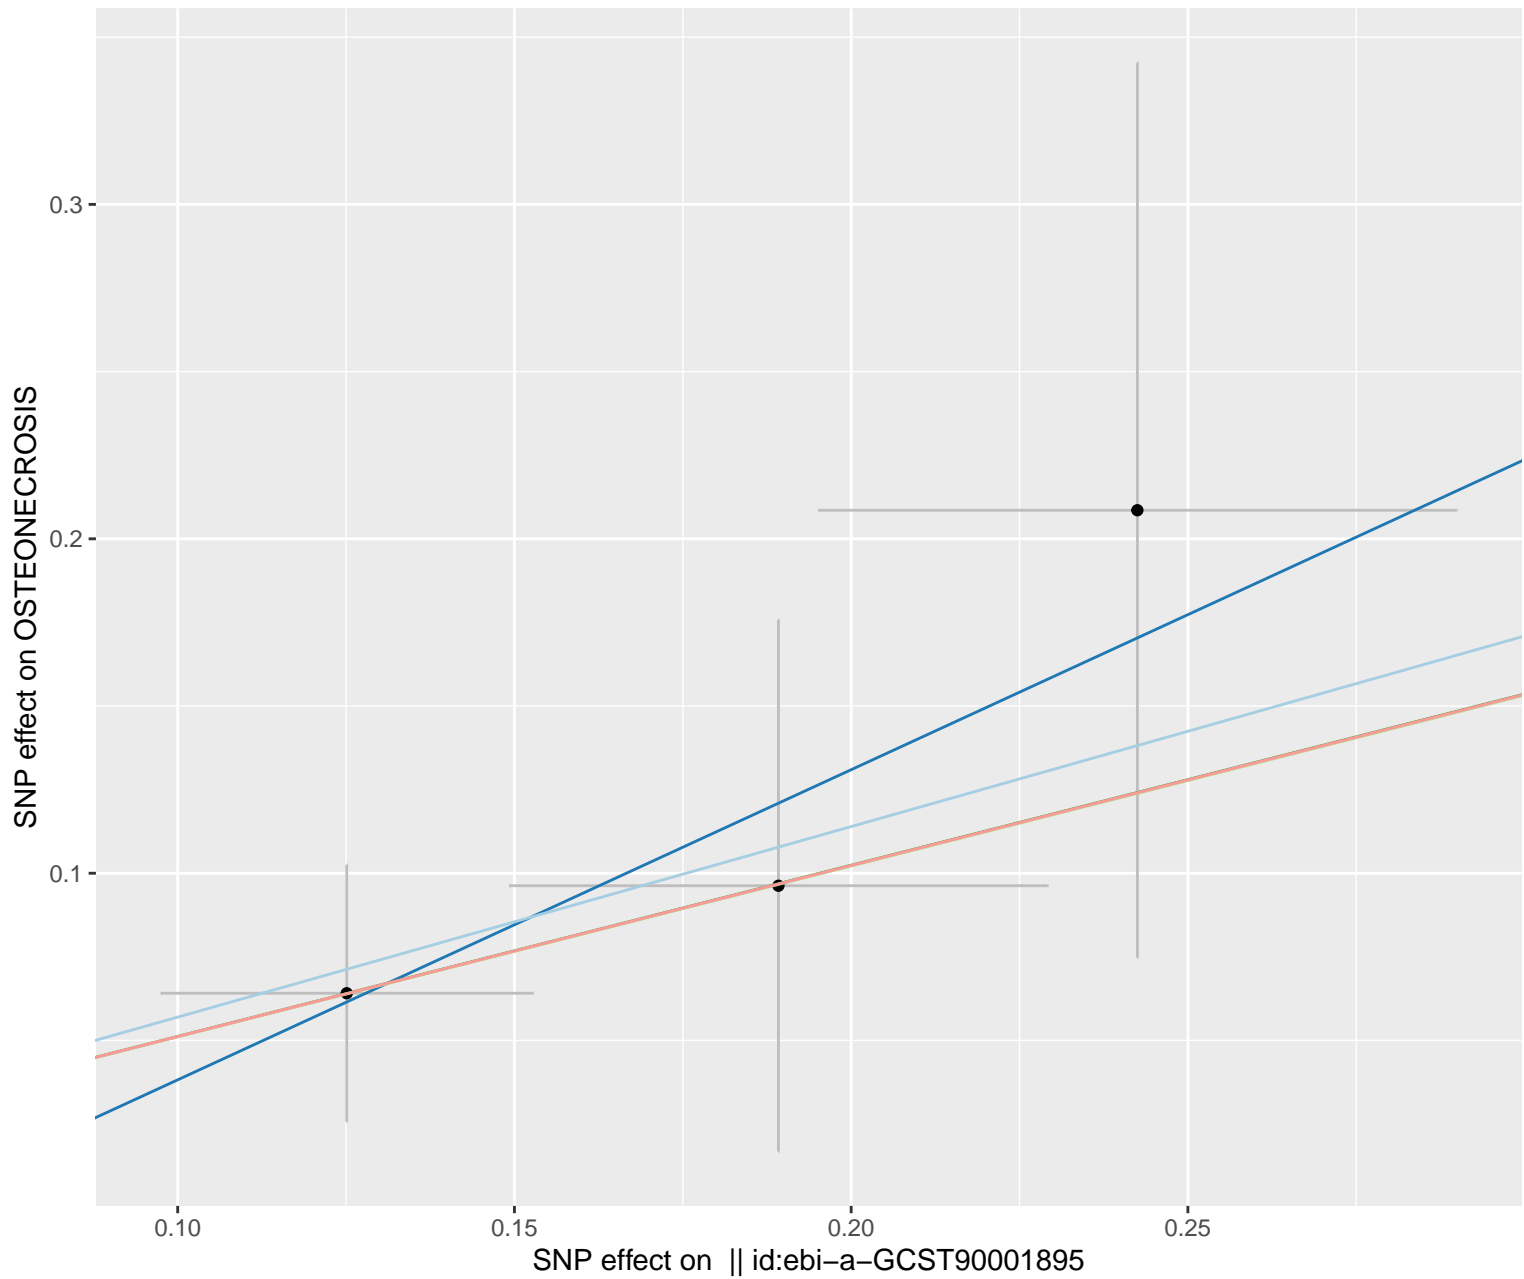

MR Method

- Inverse variance weighted
- MR Egger

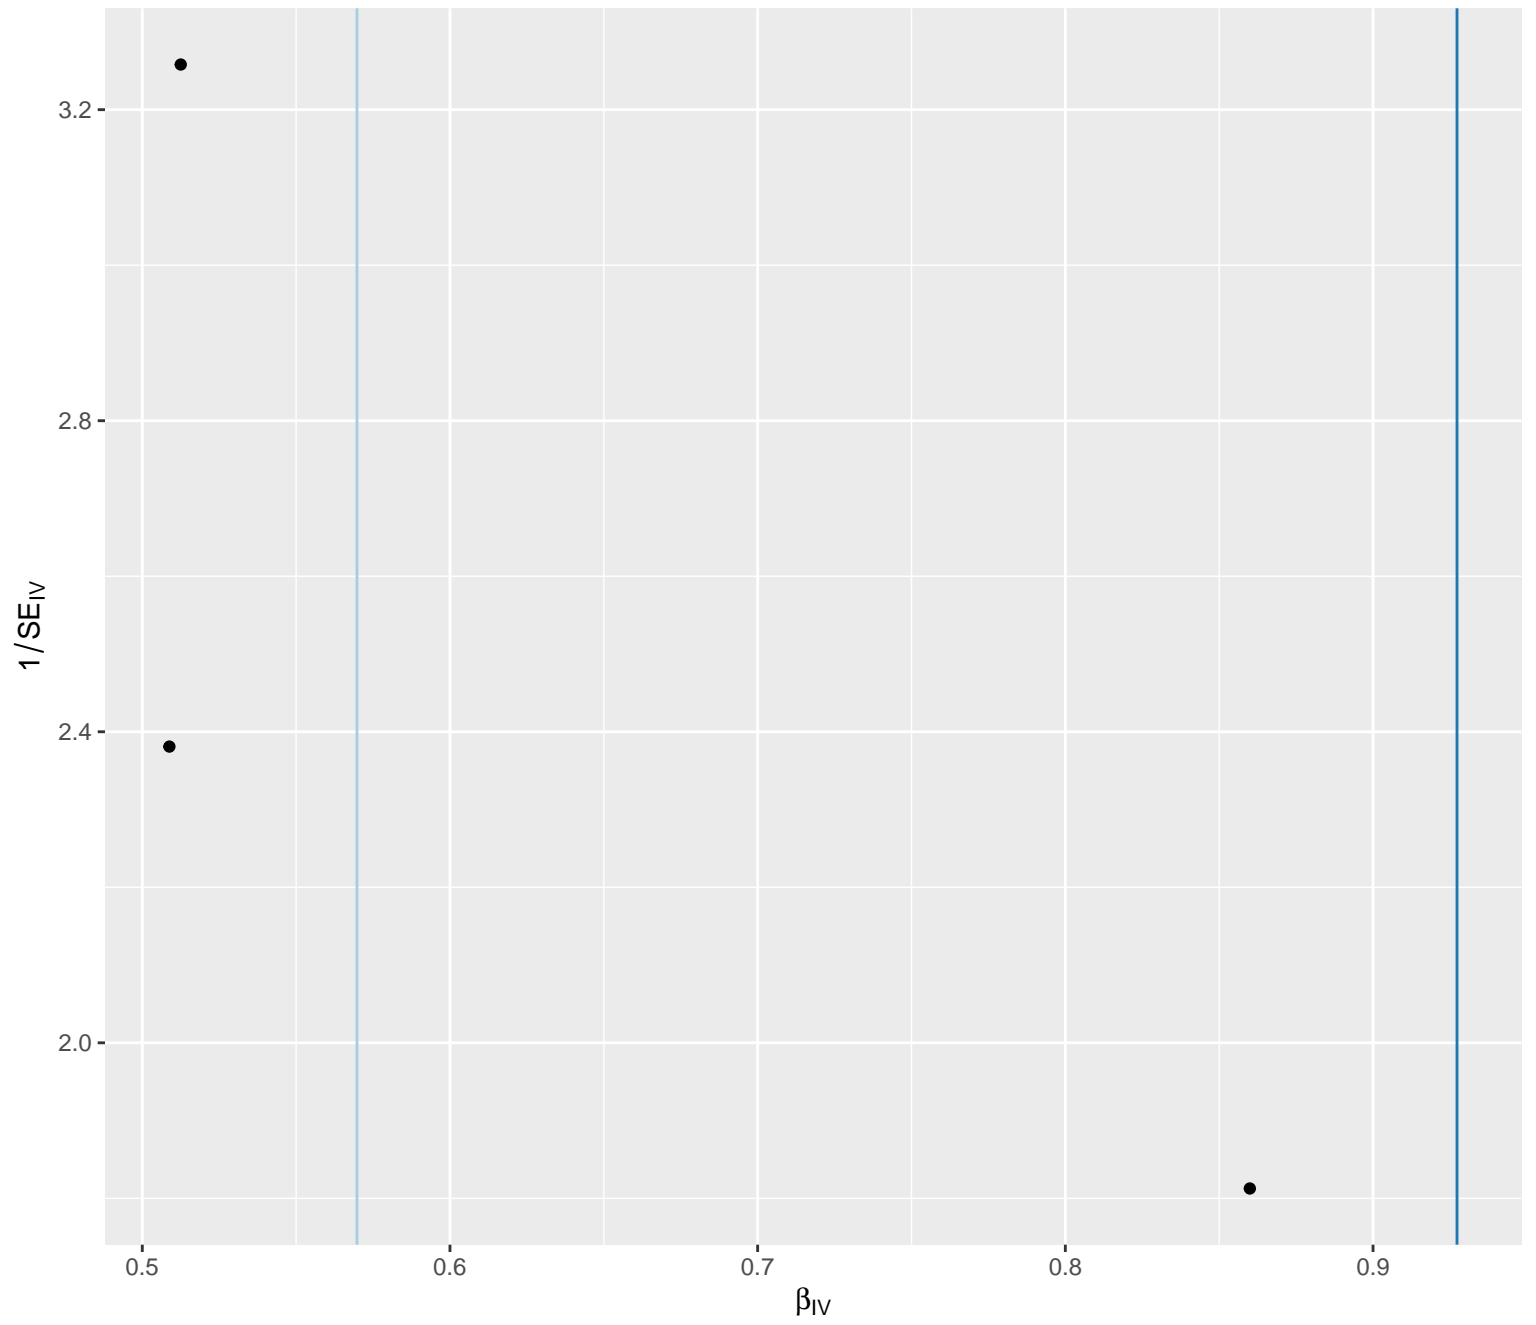

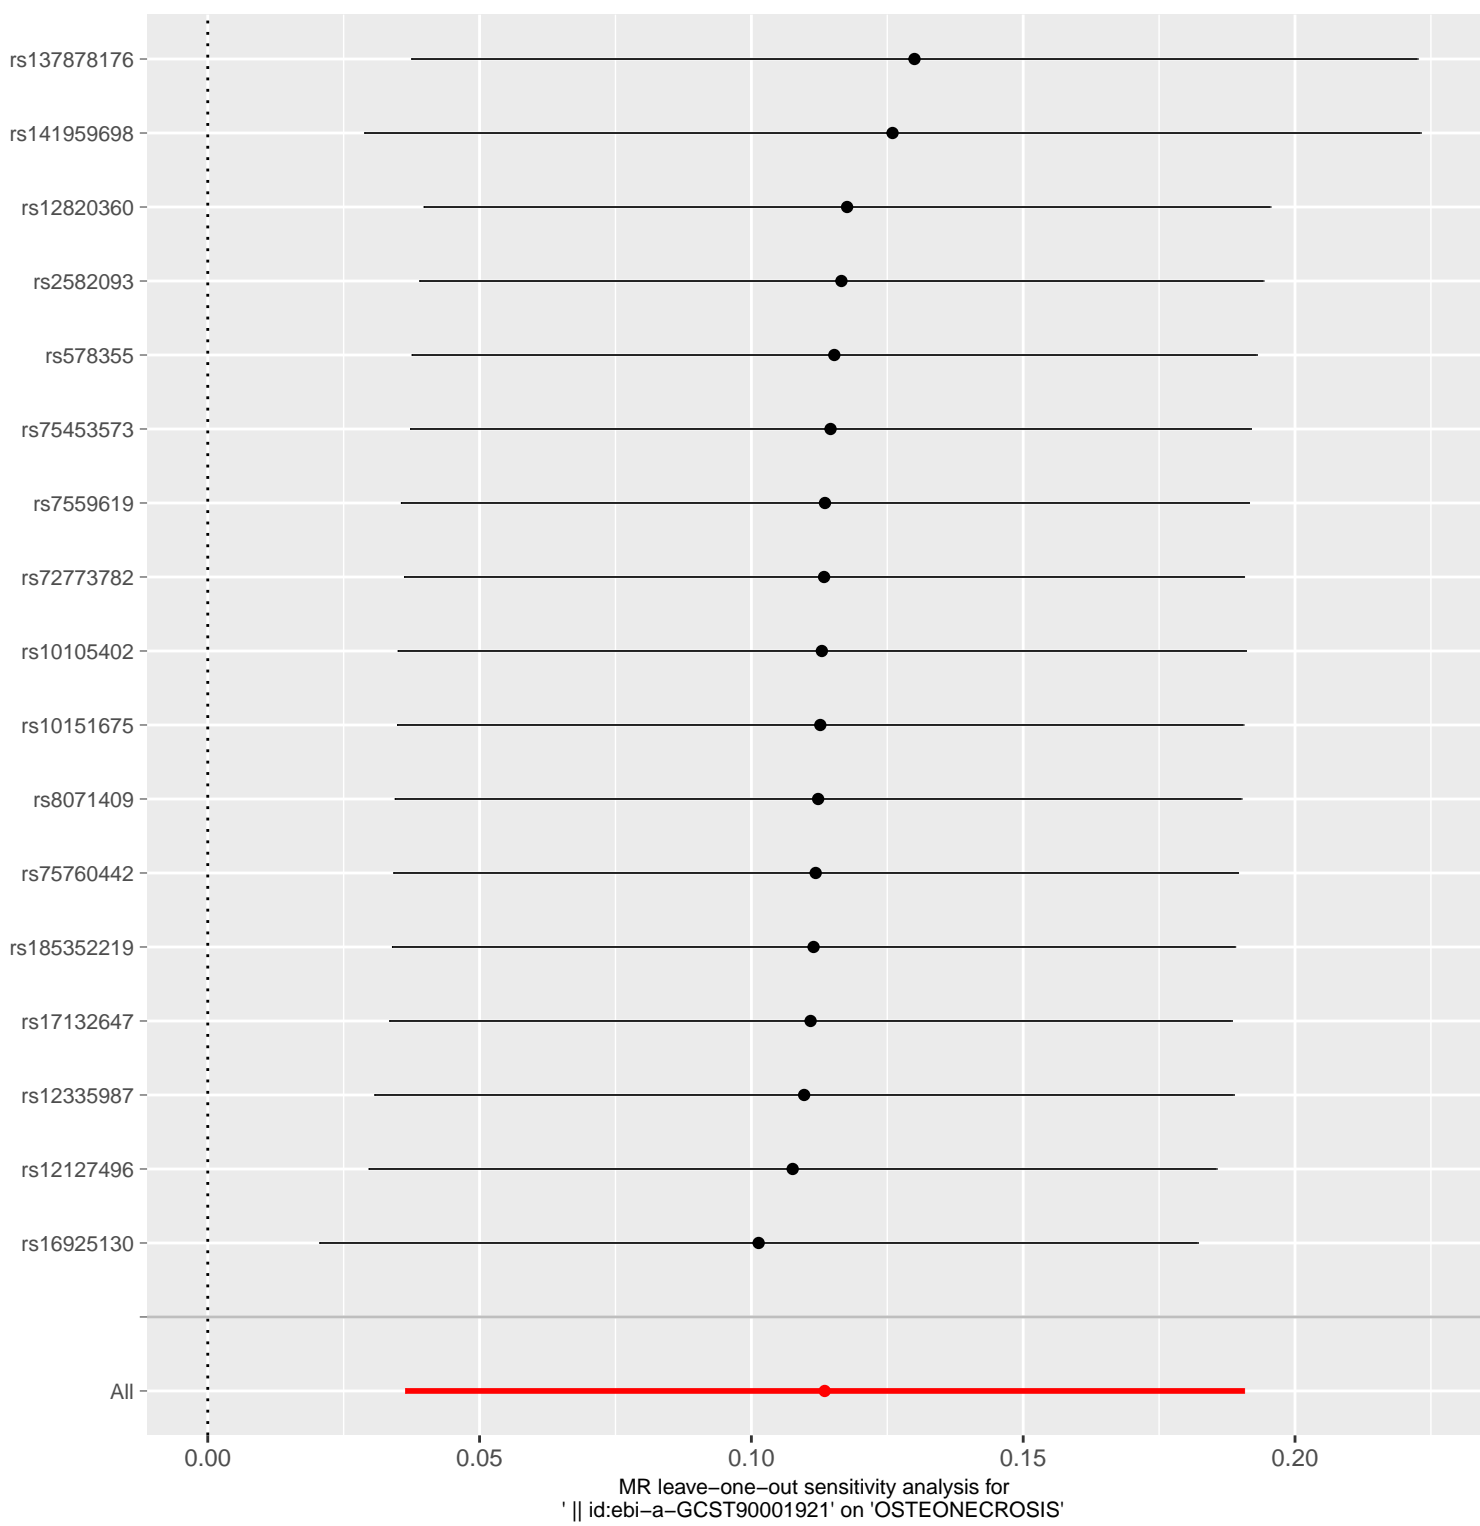

### MR Test

- Inverse variance weighted
- MR Egger
- Simple mode
- Weighted median
- Weighted mode

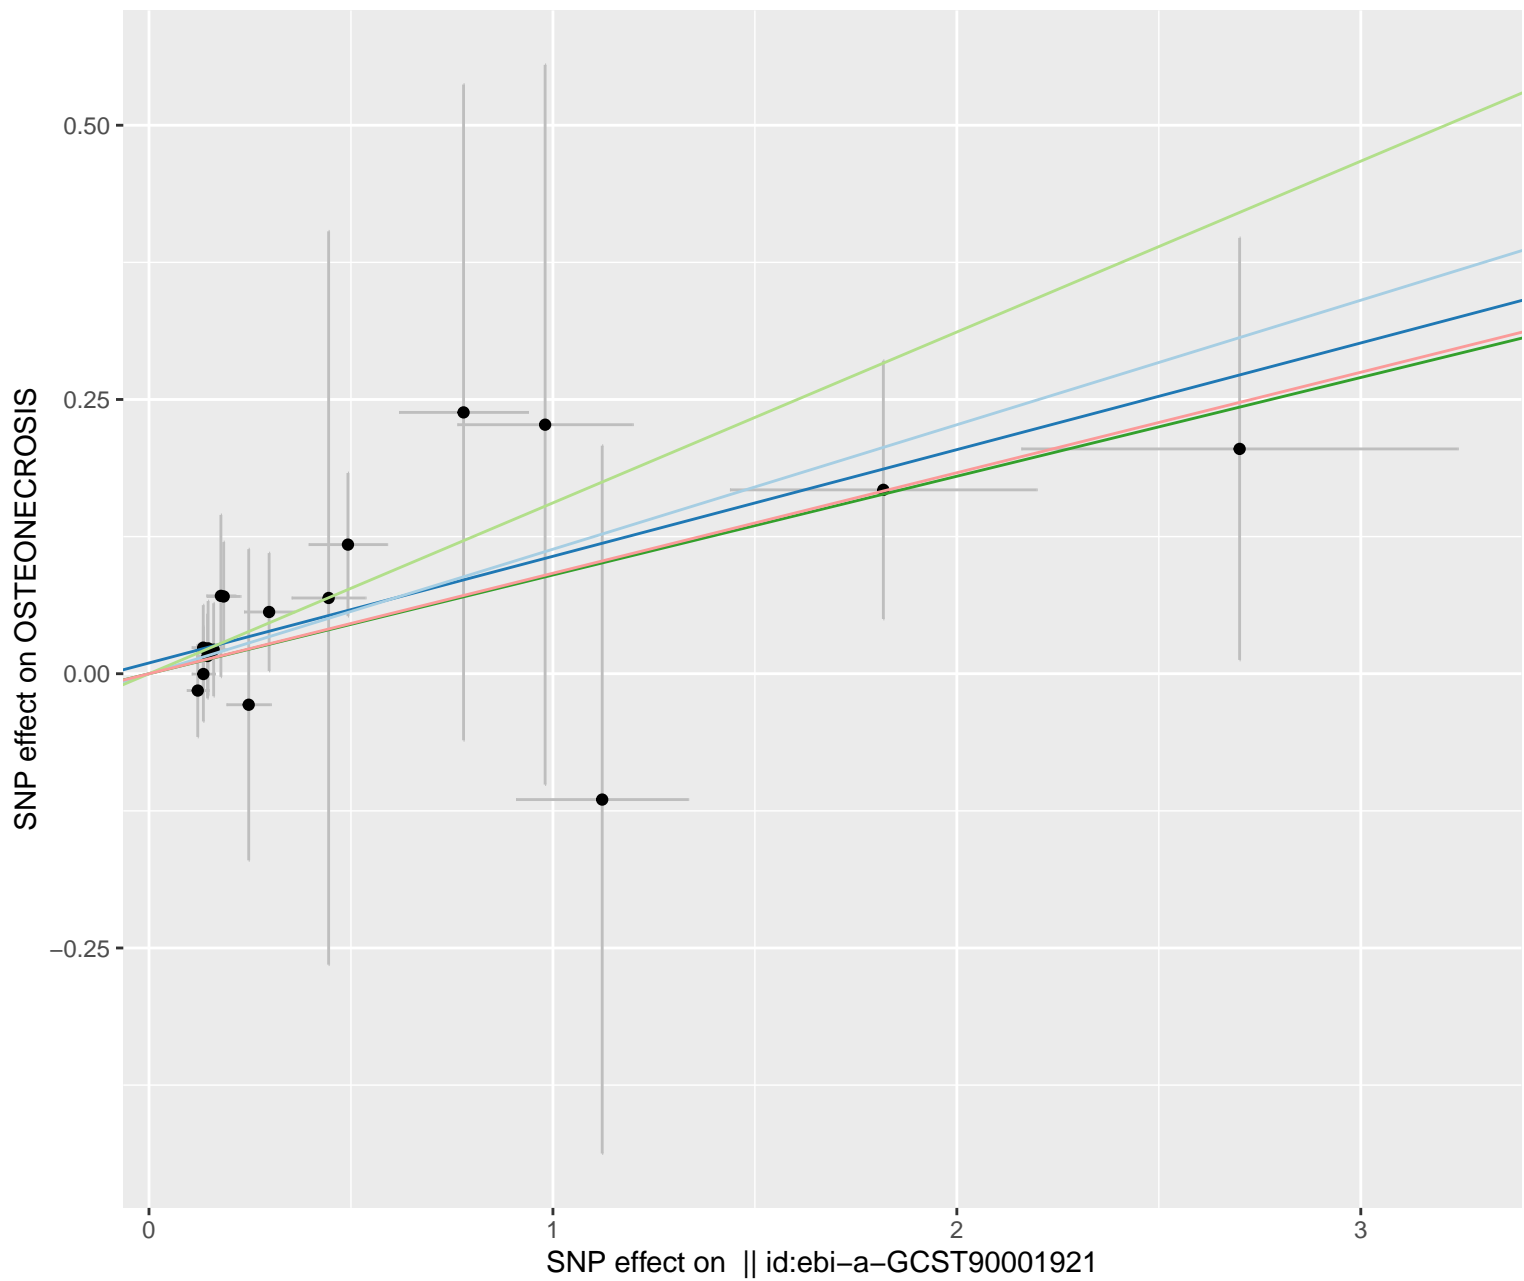

MR Method

- Inverse variance weighted
- MR Egger

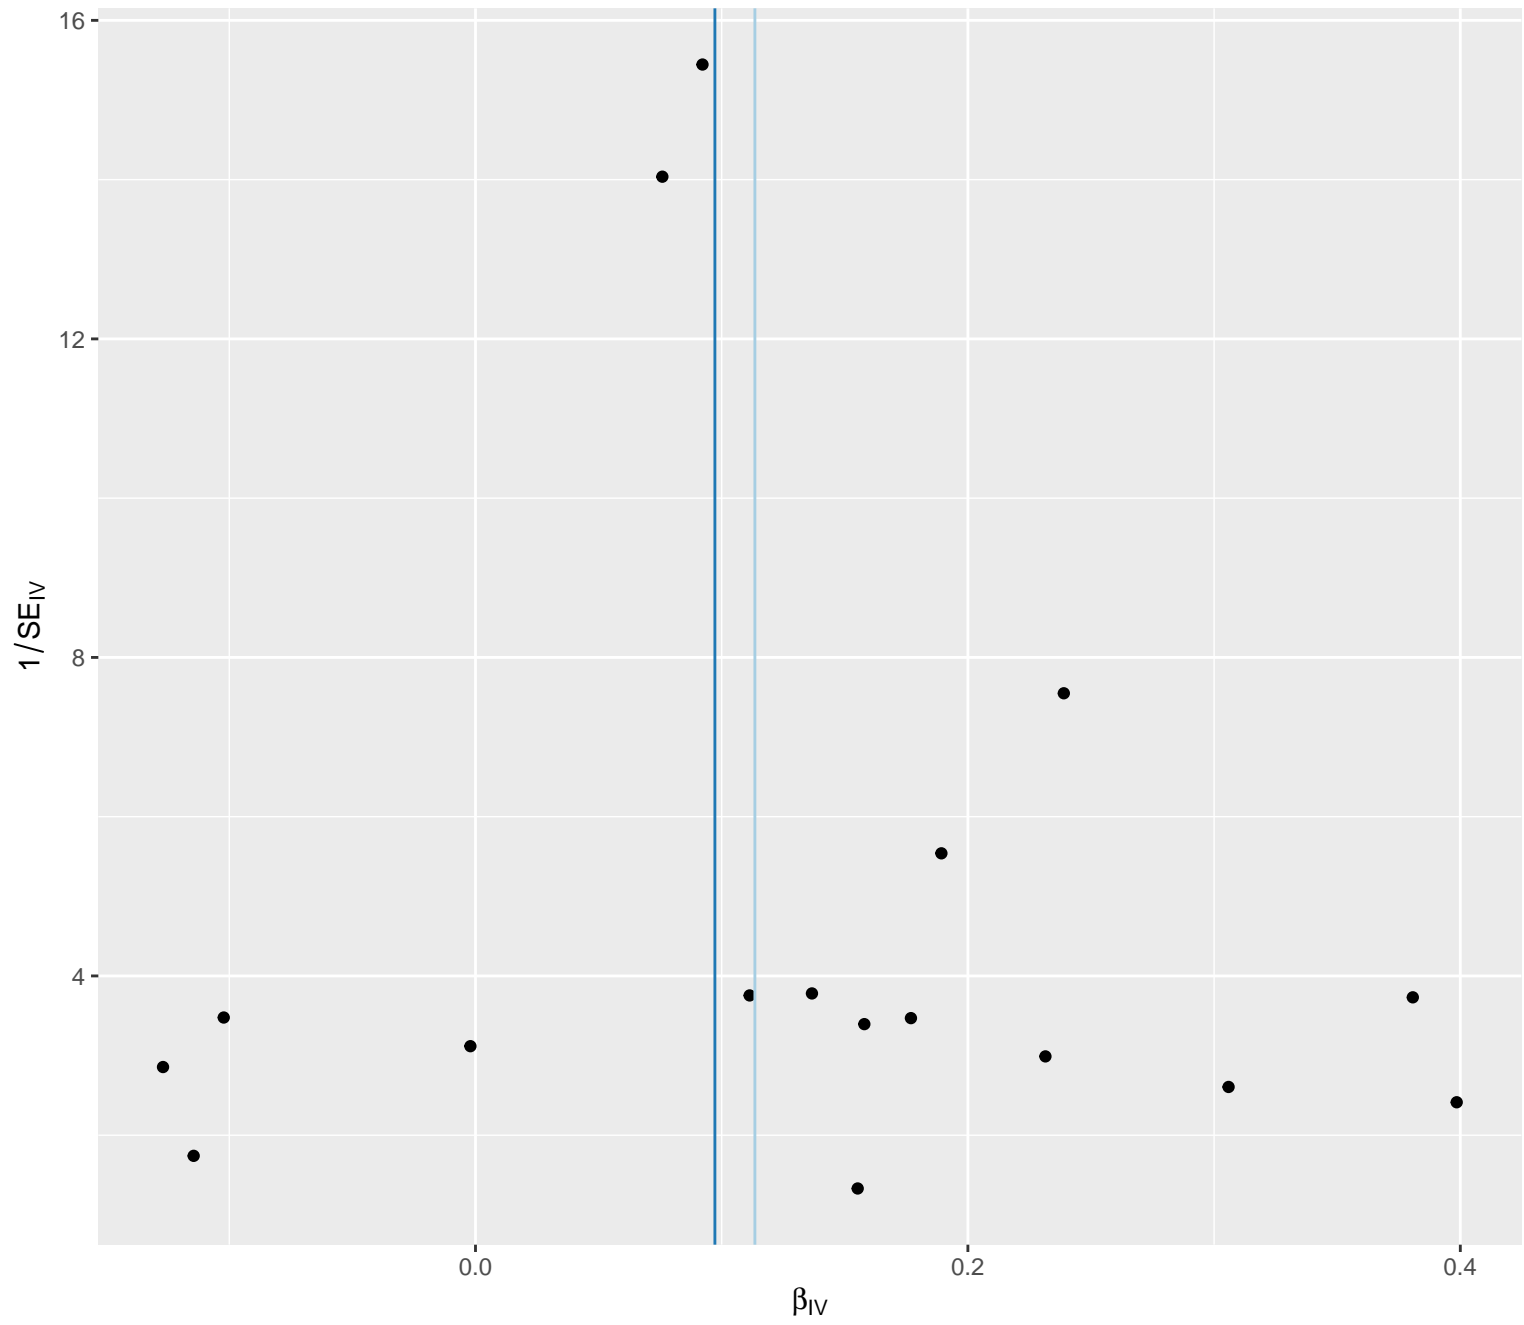

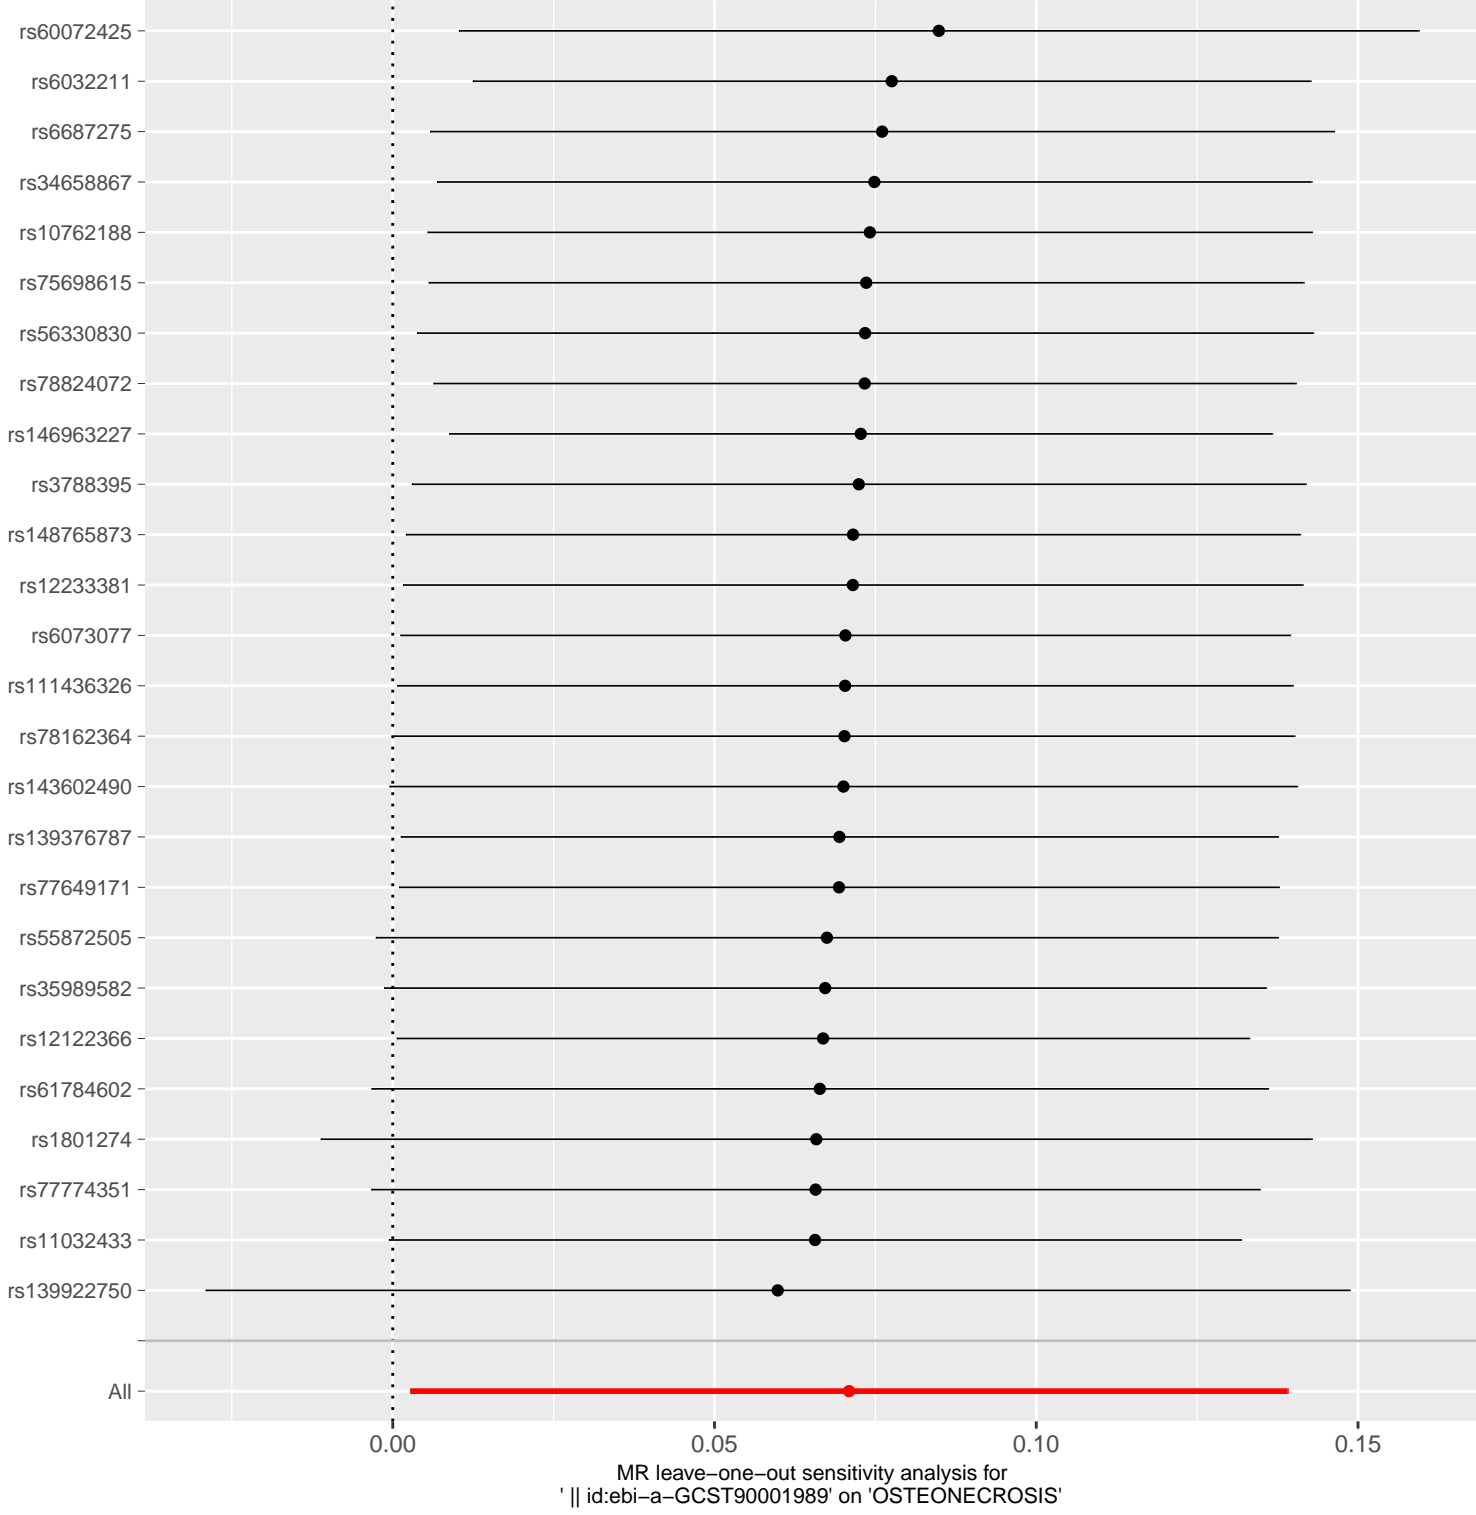

MR Test

- Inverse variance weighted
- MR Egger
- Simple mode
- Weighted median
- Weighted mode

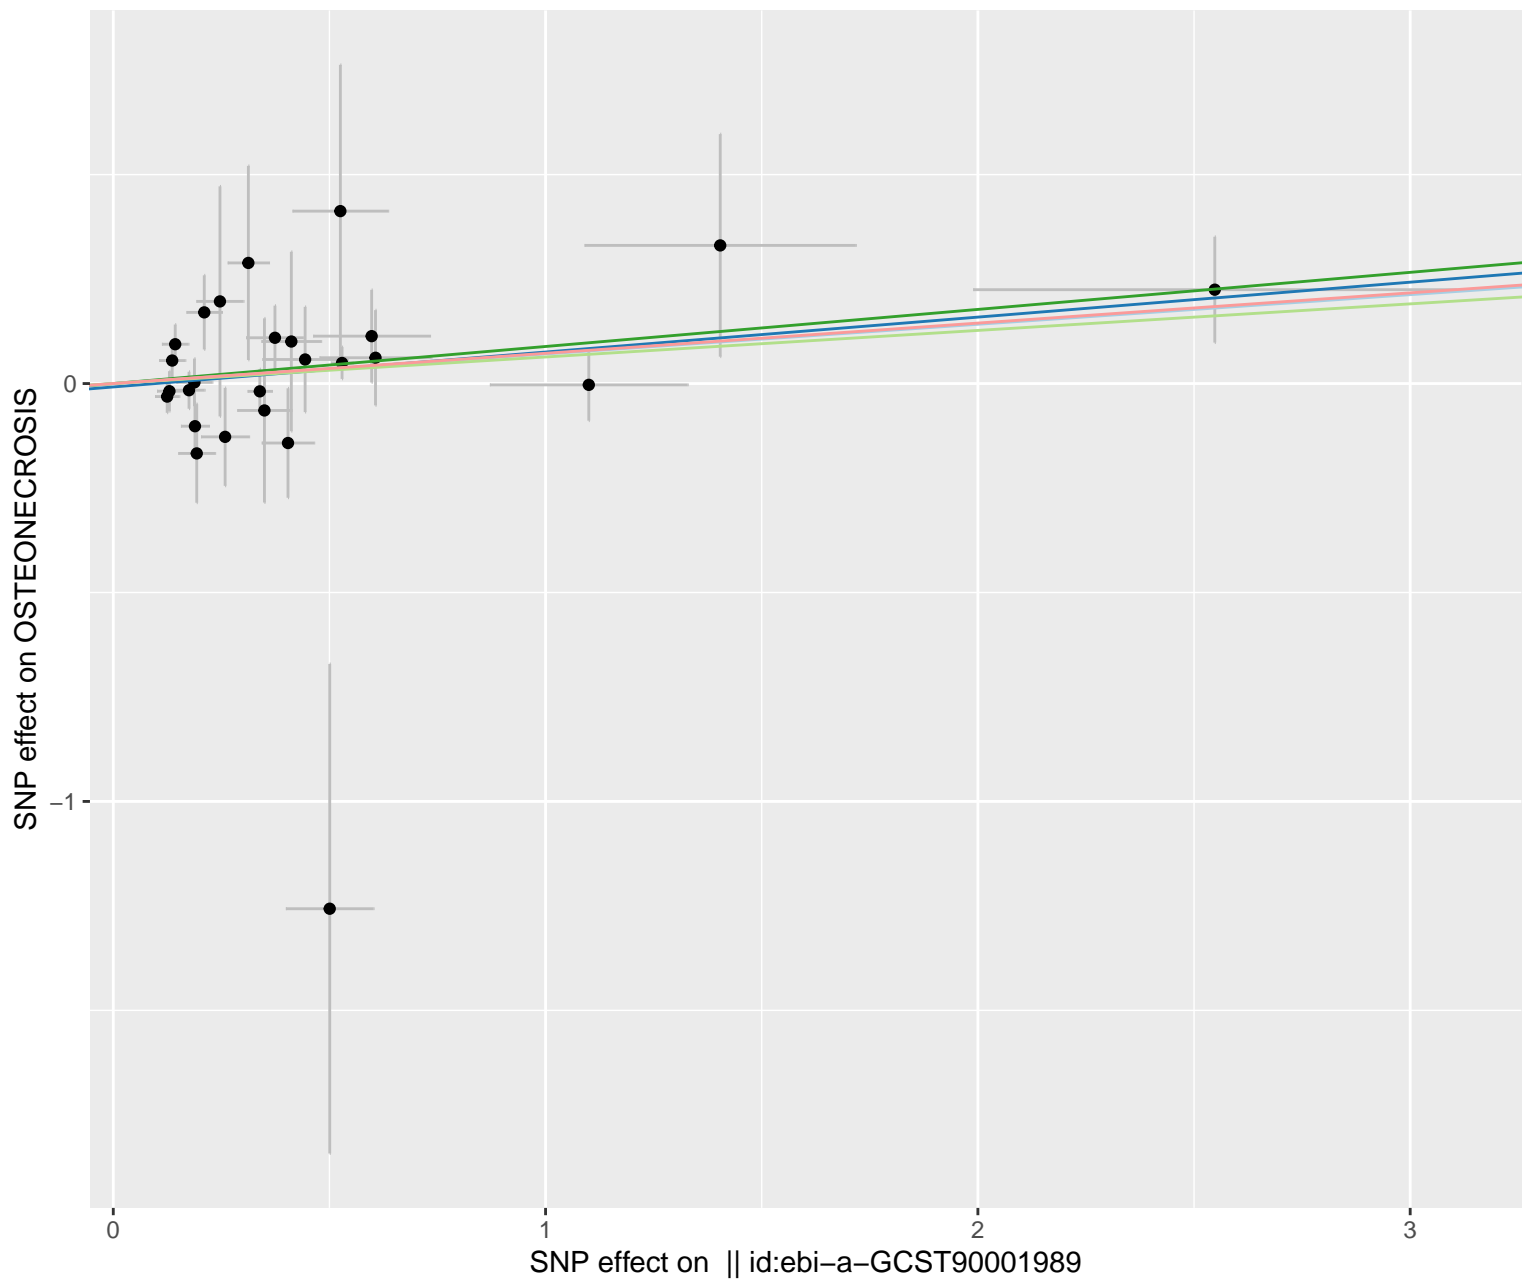

### MR Method

- Inverse variance weighted
- MR Egger

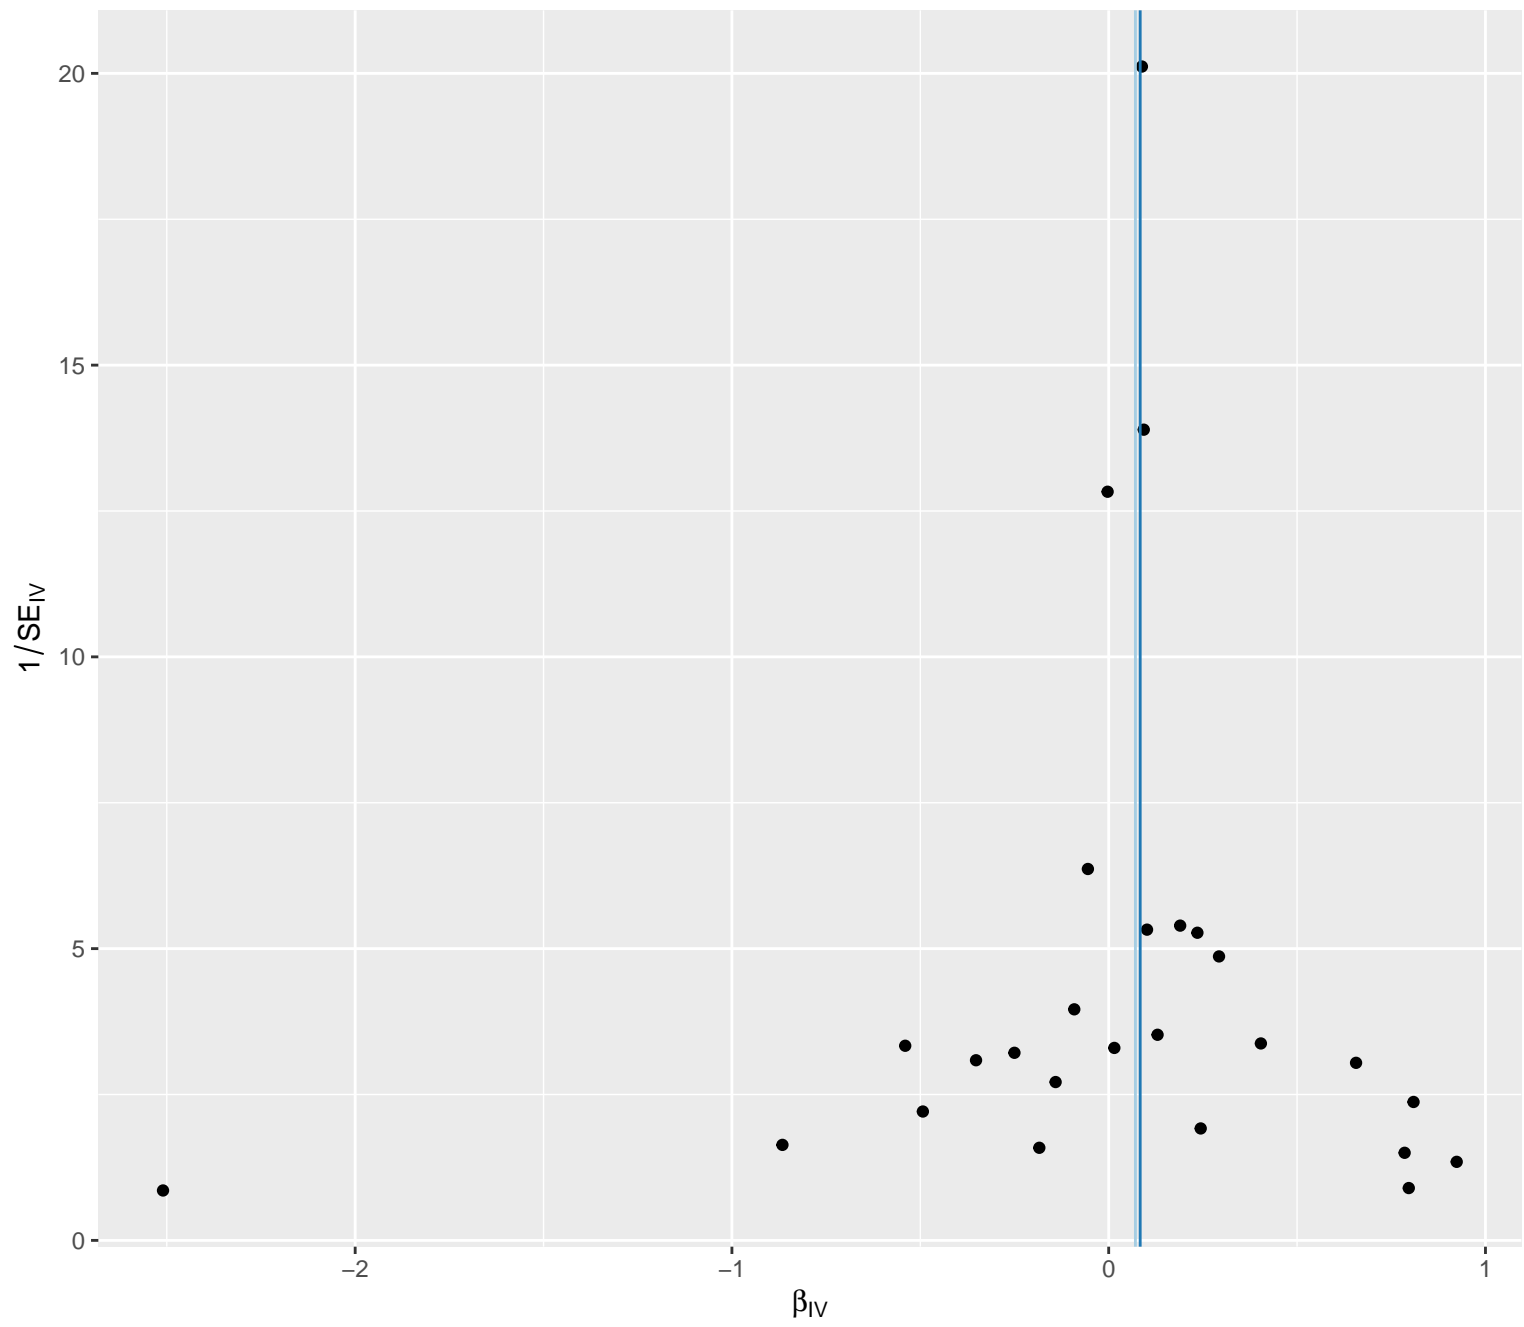



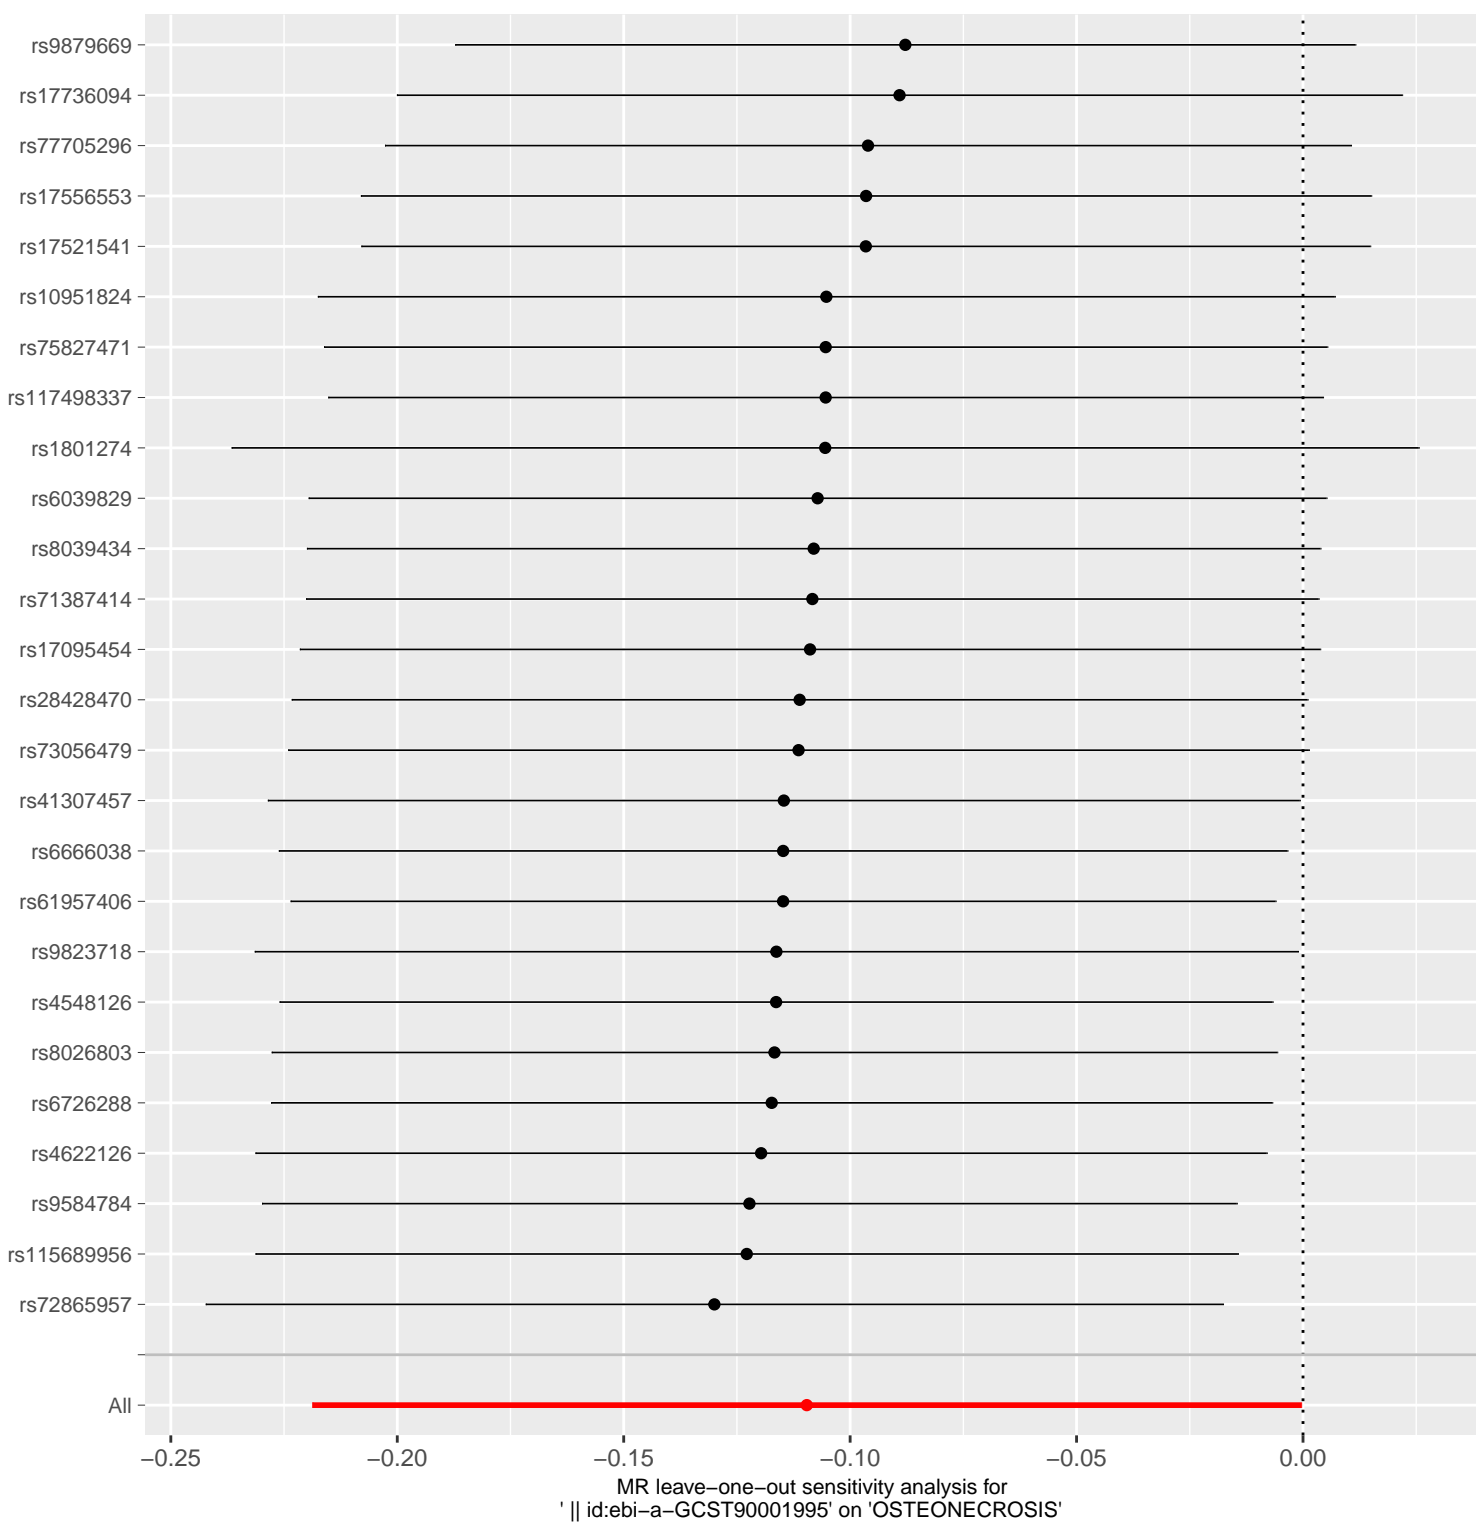

MR Test

- Inverse variance weighted
- MR Egger
- Simple mode
- Weighted median
- Weighted mode

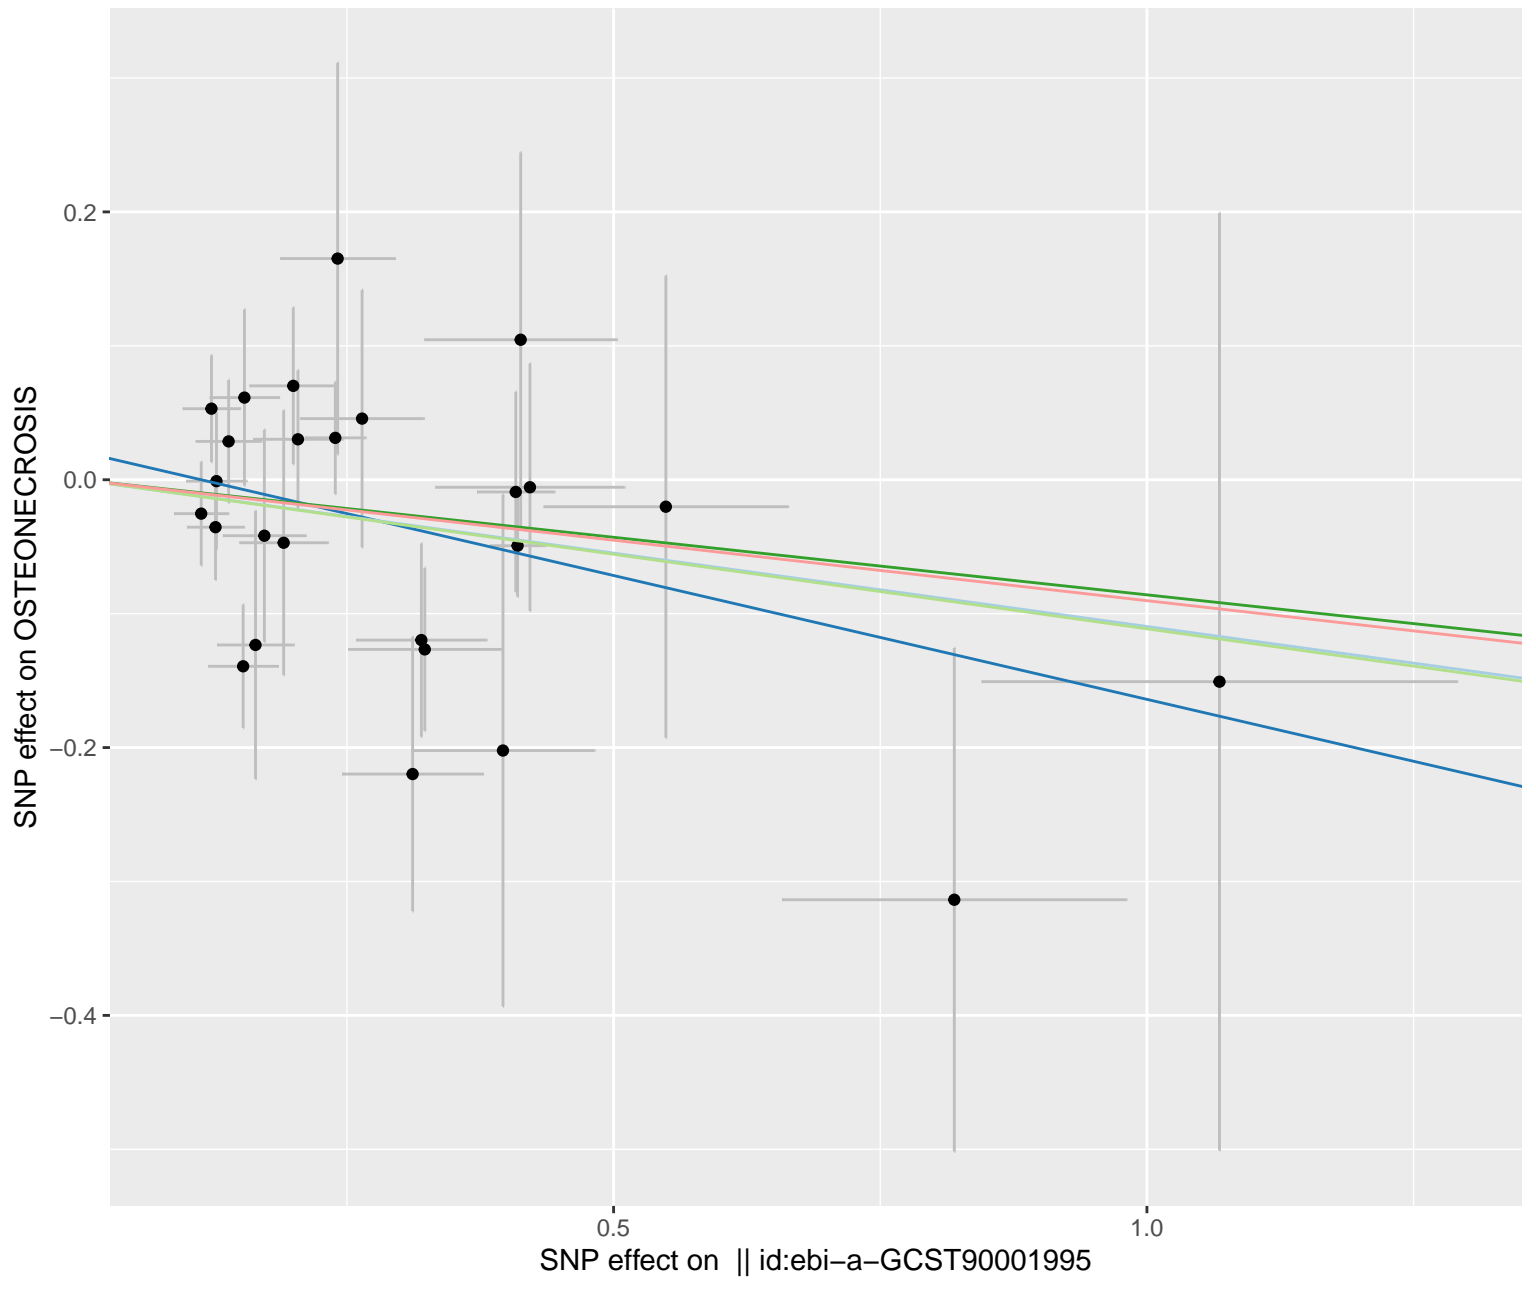

MR Method

- Inverse variance weighted
- MR Egger

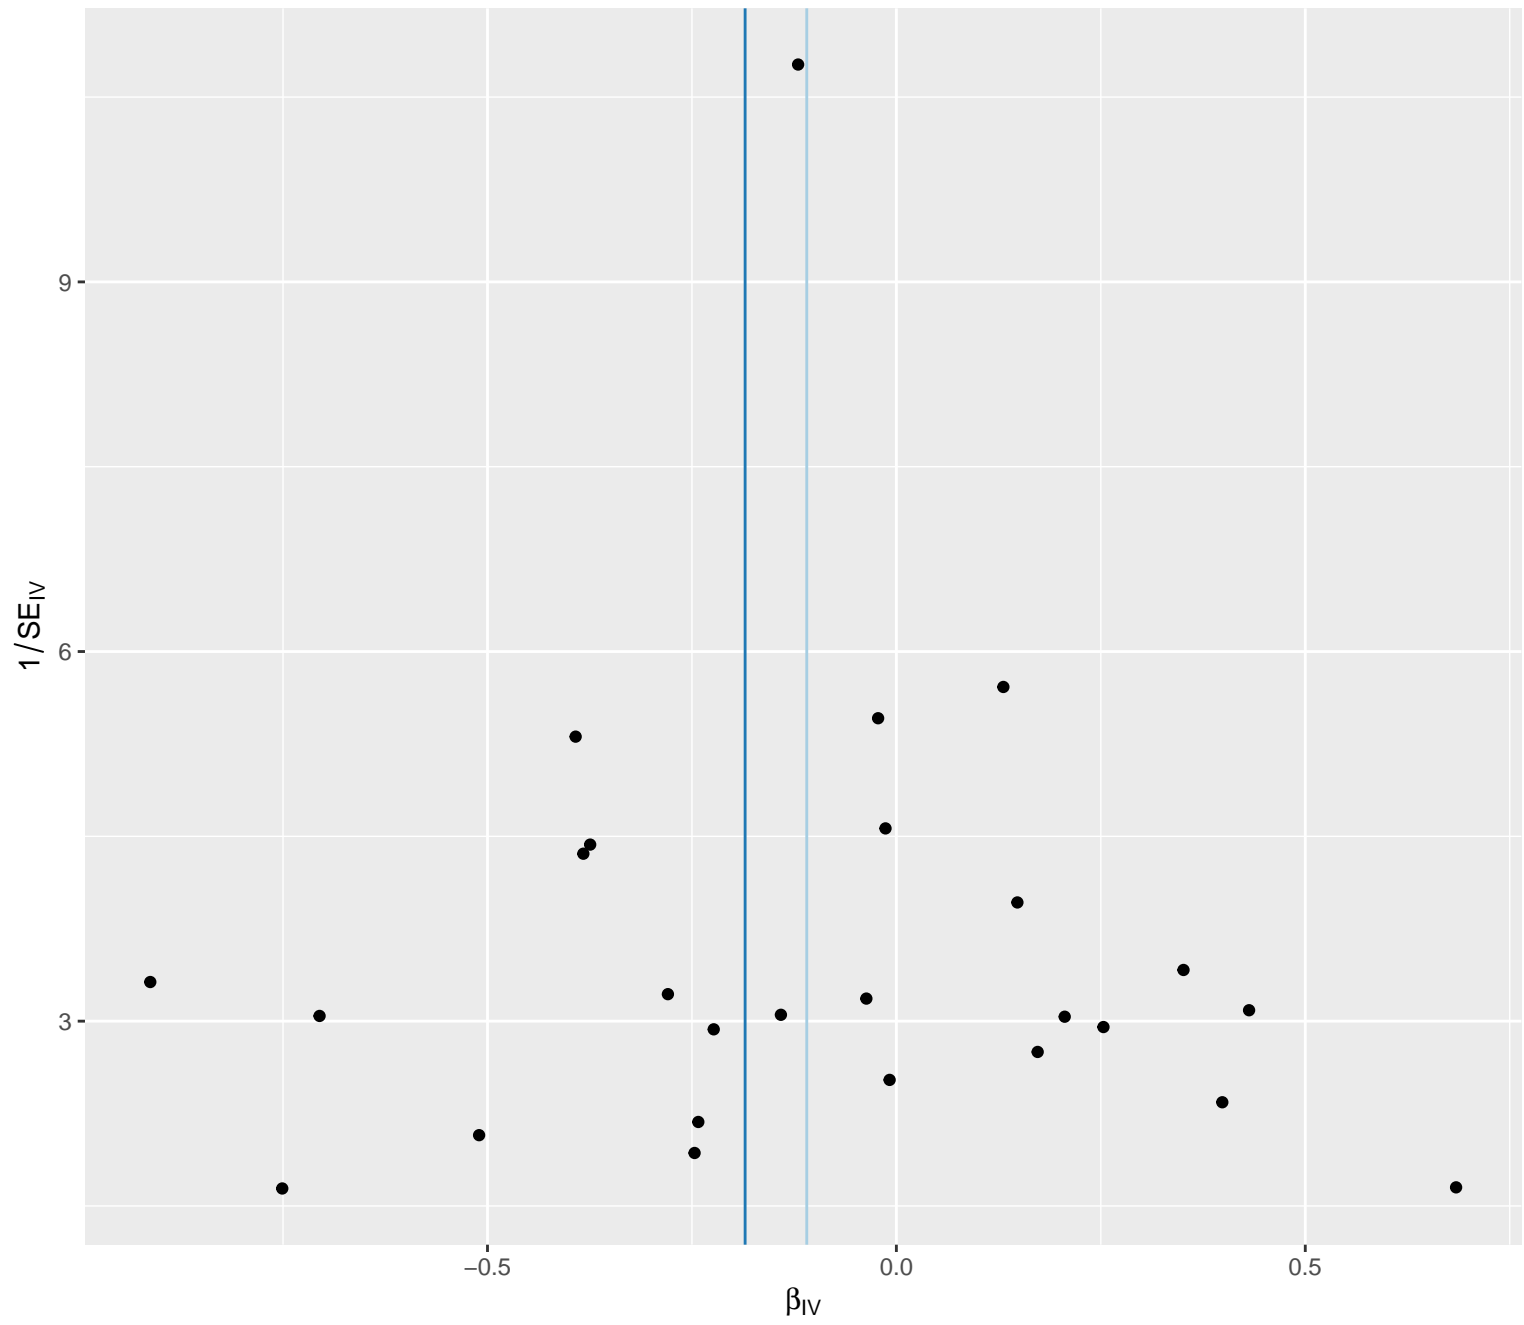

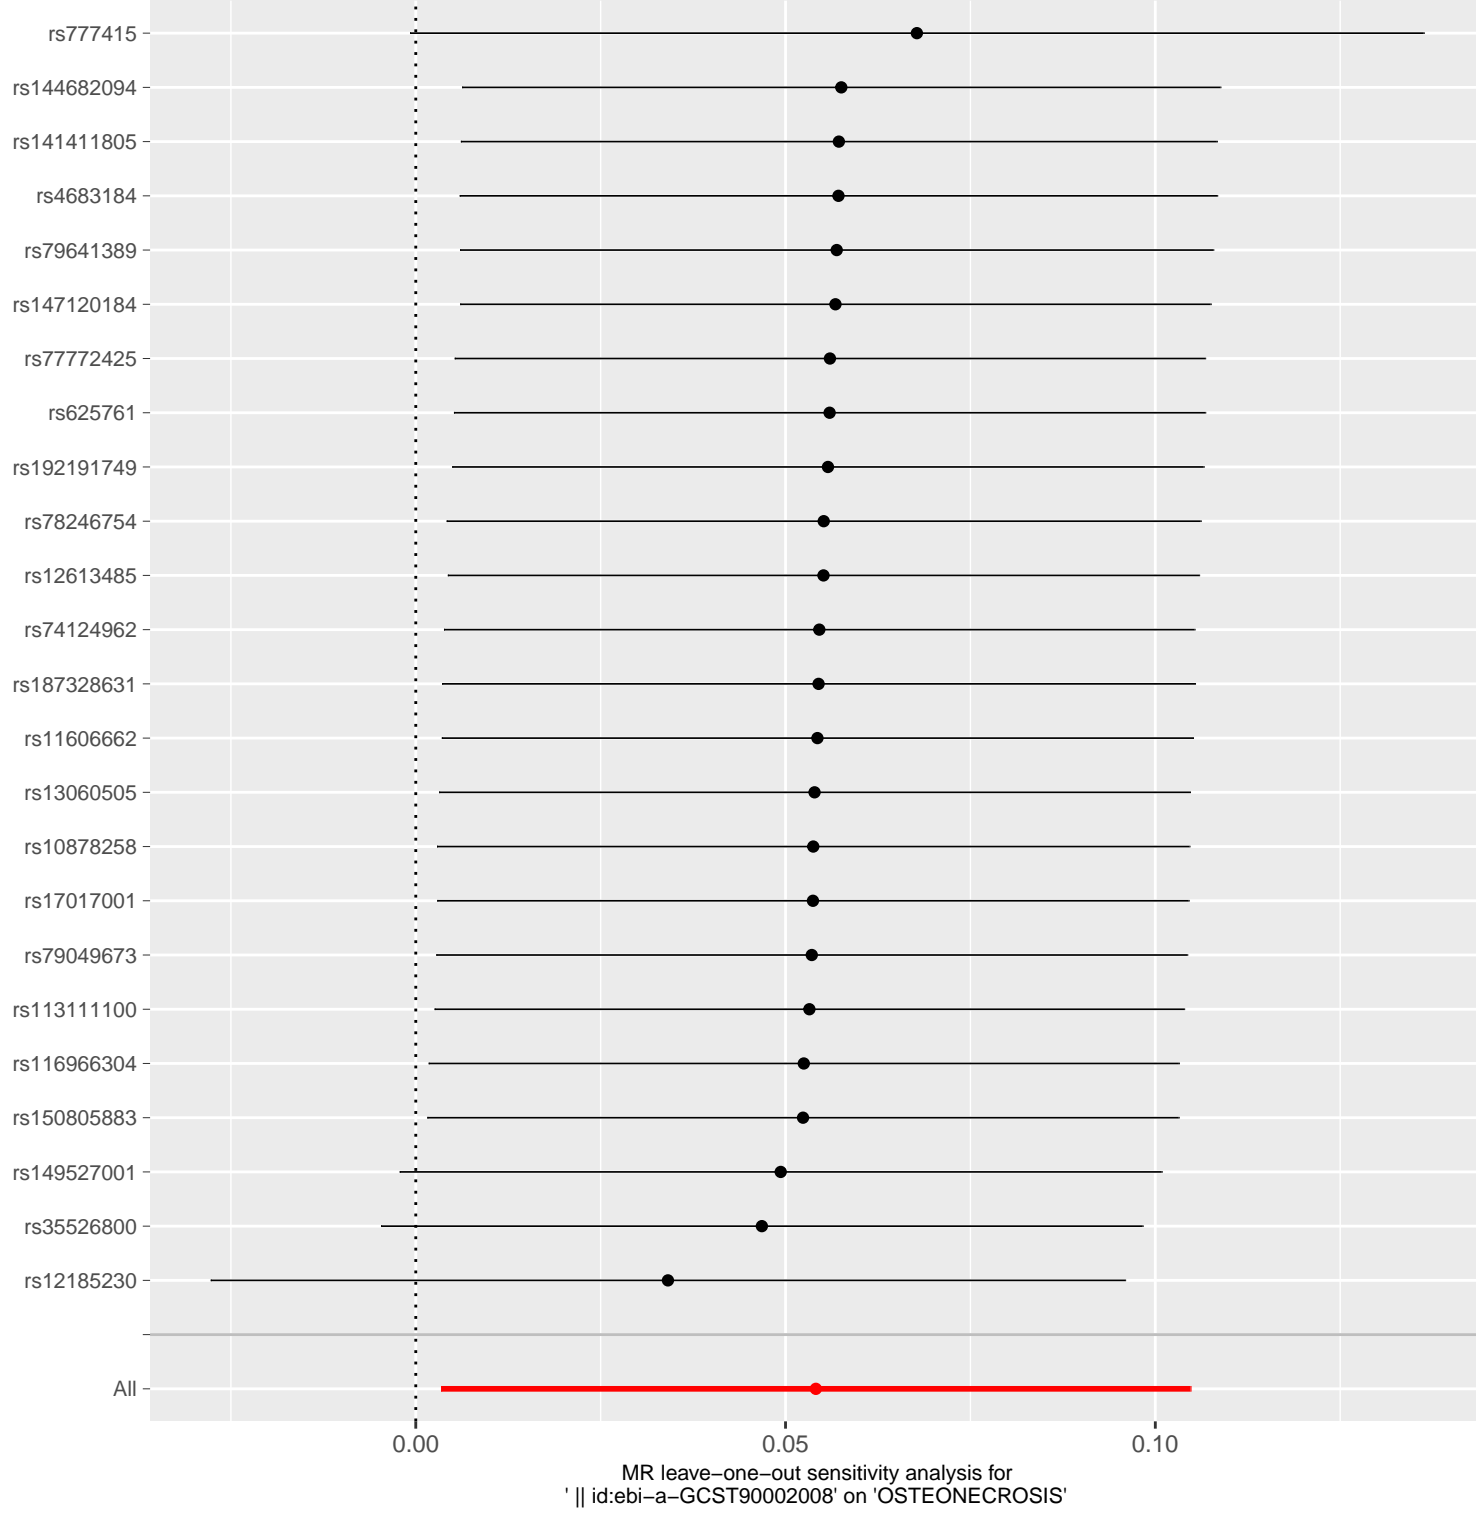

MR Test

- Inverse variance weighted
- MR Egger
- Simple mode
- Weighted median
- Weighted mode

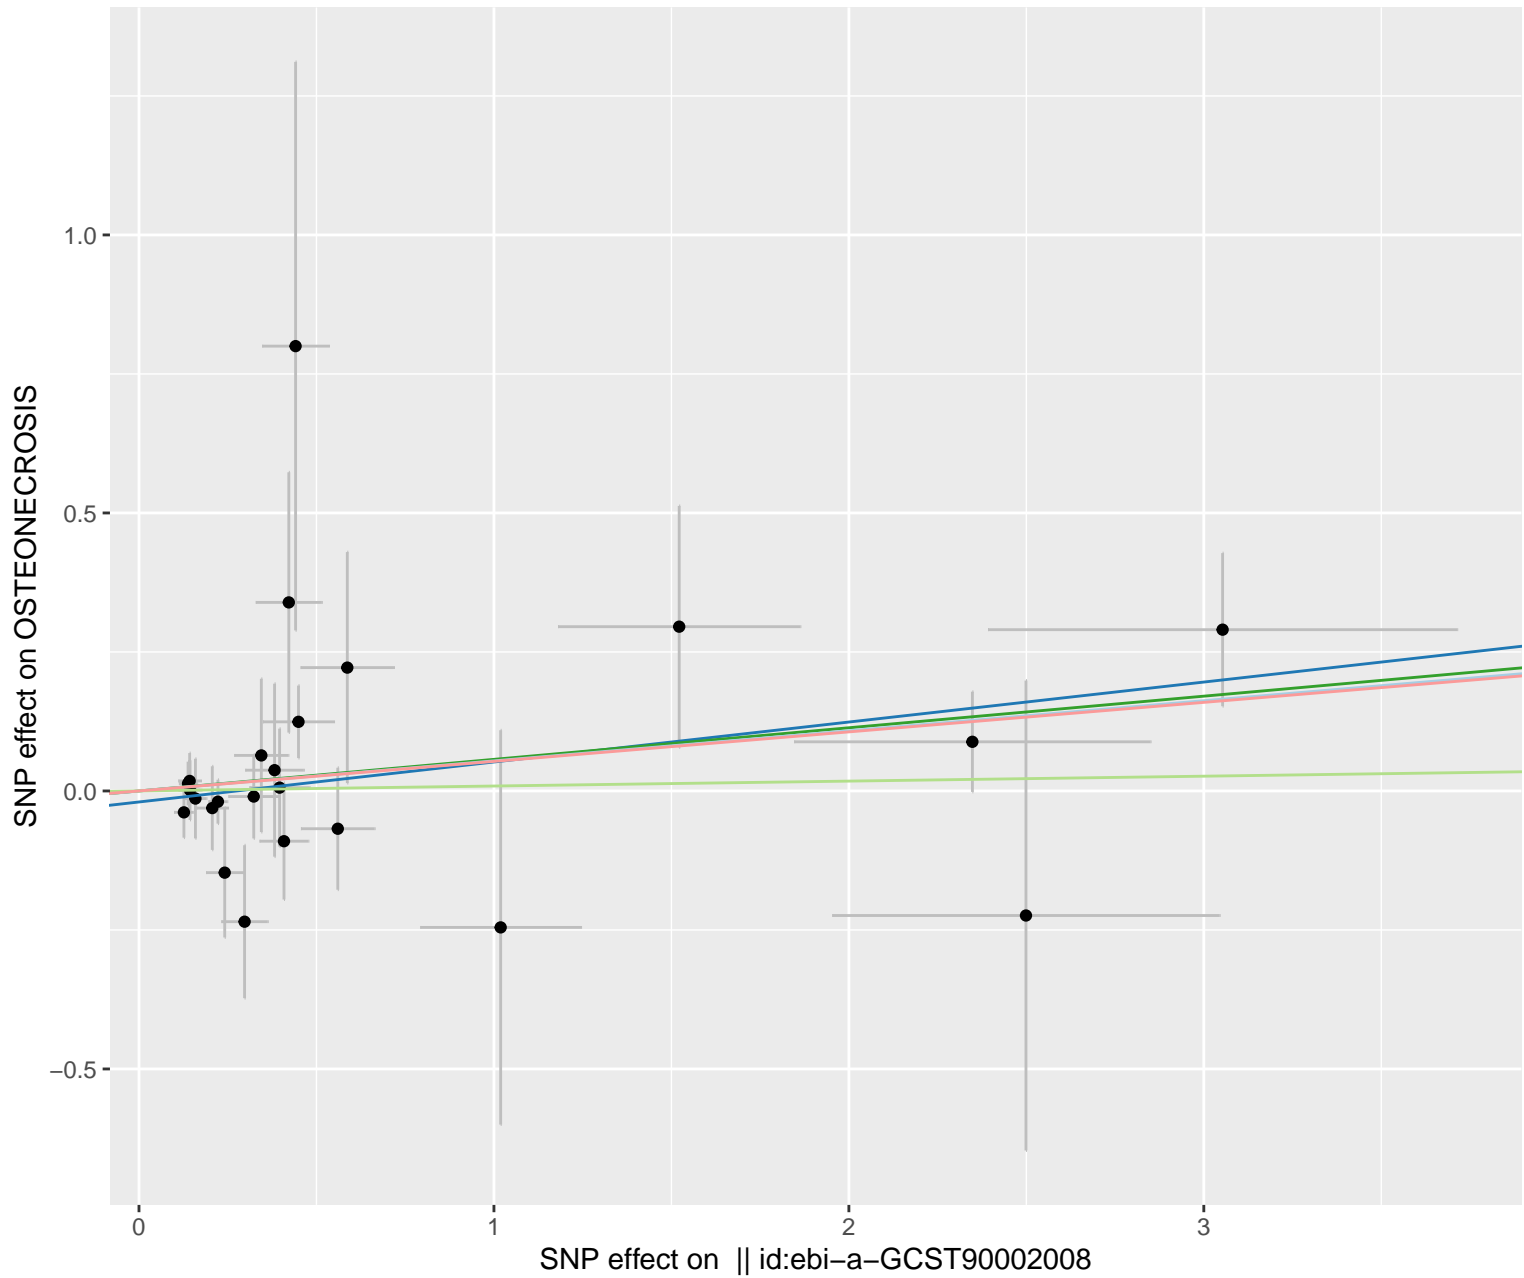

MR Method

- Inverse variance weighted
- MR Egger

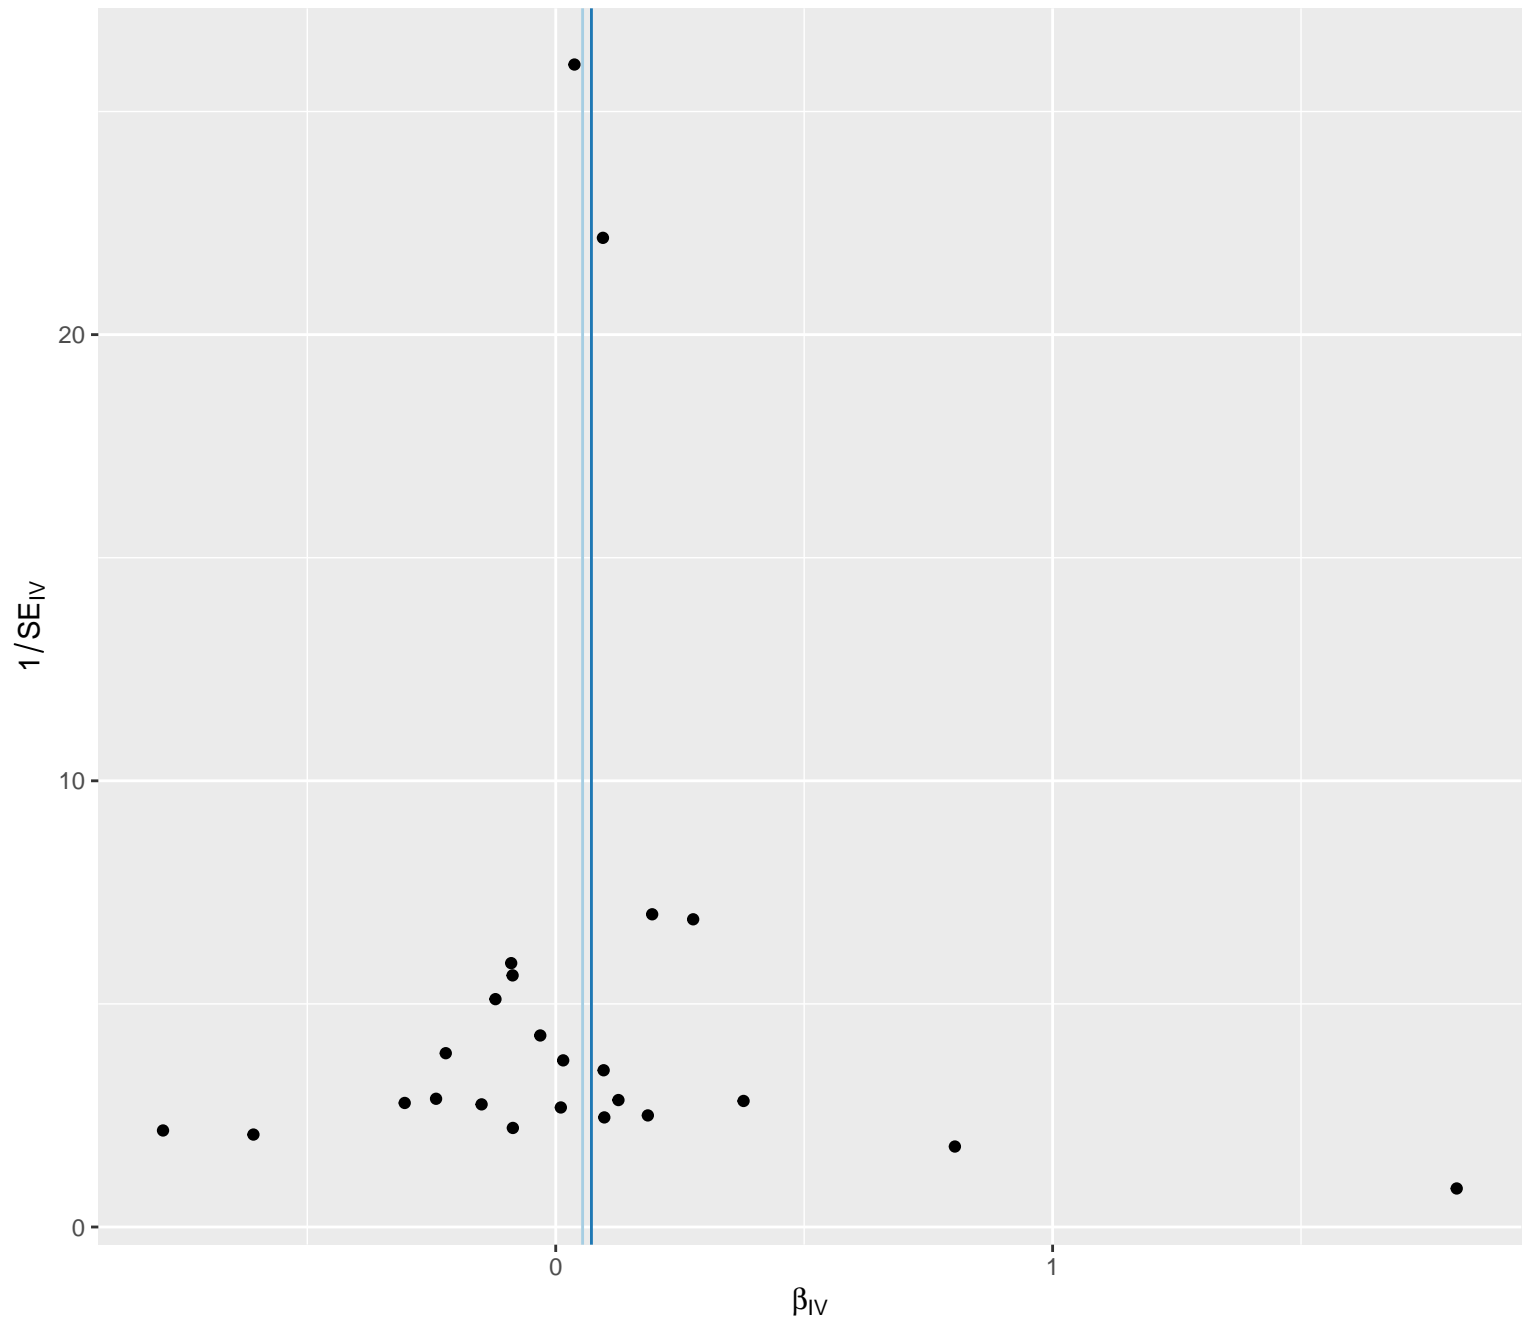

Supplement: js9-110-3285-s003.pdf [file js9-110-3285-s003.pdf]
