# Supplementary material for: Complex causal association between genetically predicted 731 immunocyte phenotype and osteonecrosis: a bidirectional two-sample Mendelian randomization analysis
Source: PubMed Central journal article supplement (PMC11175804; doi:10.1097/js9.0000000000001327), 2024-03-18

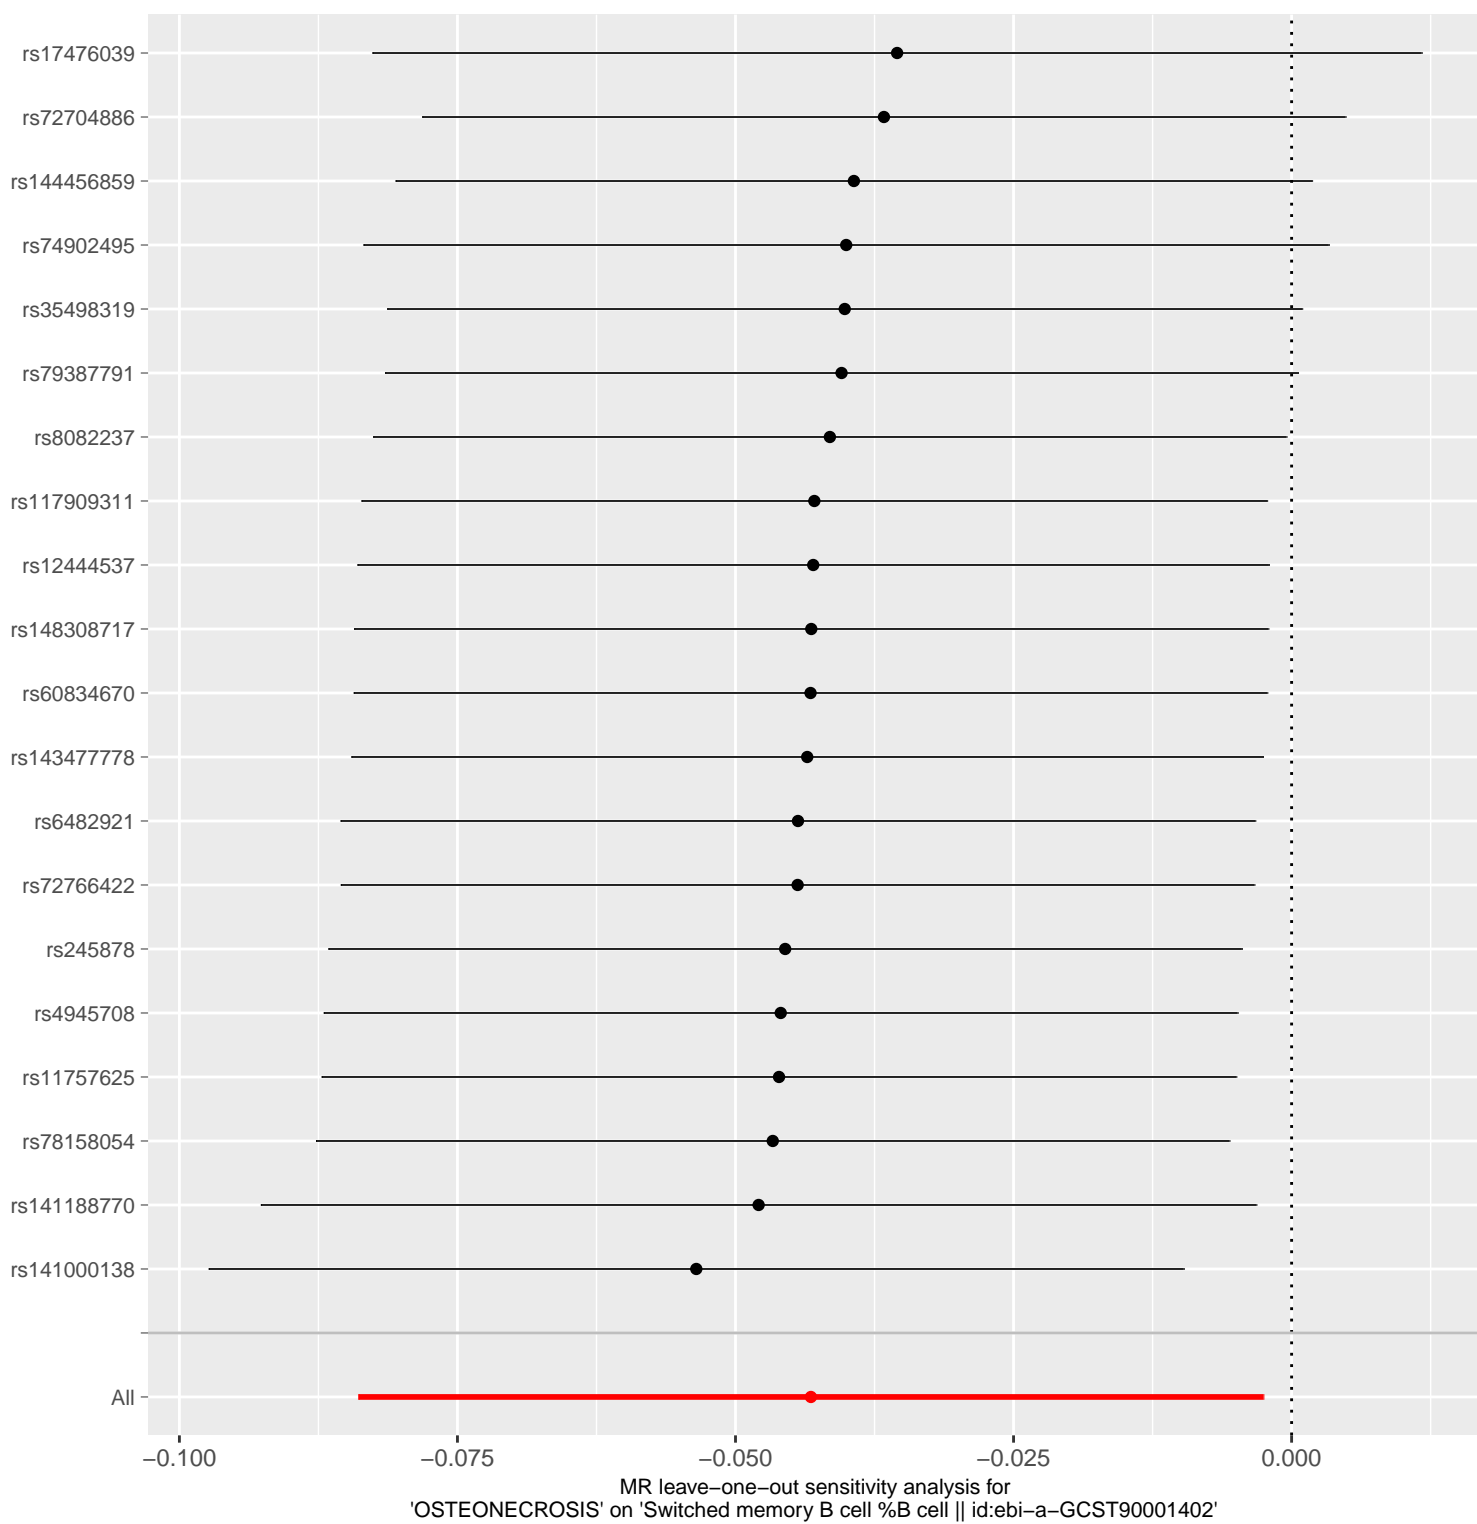

MR Test

- Inverse variance weighted
- MR Egger
- Simple mode
- Weighted median
- Weighted mode

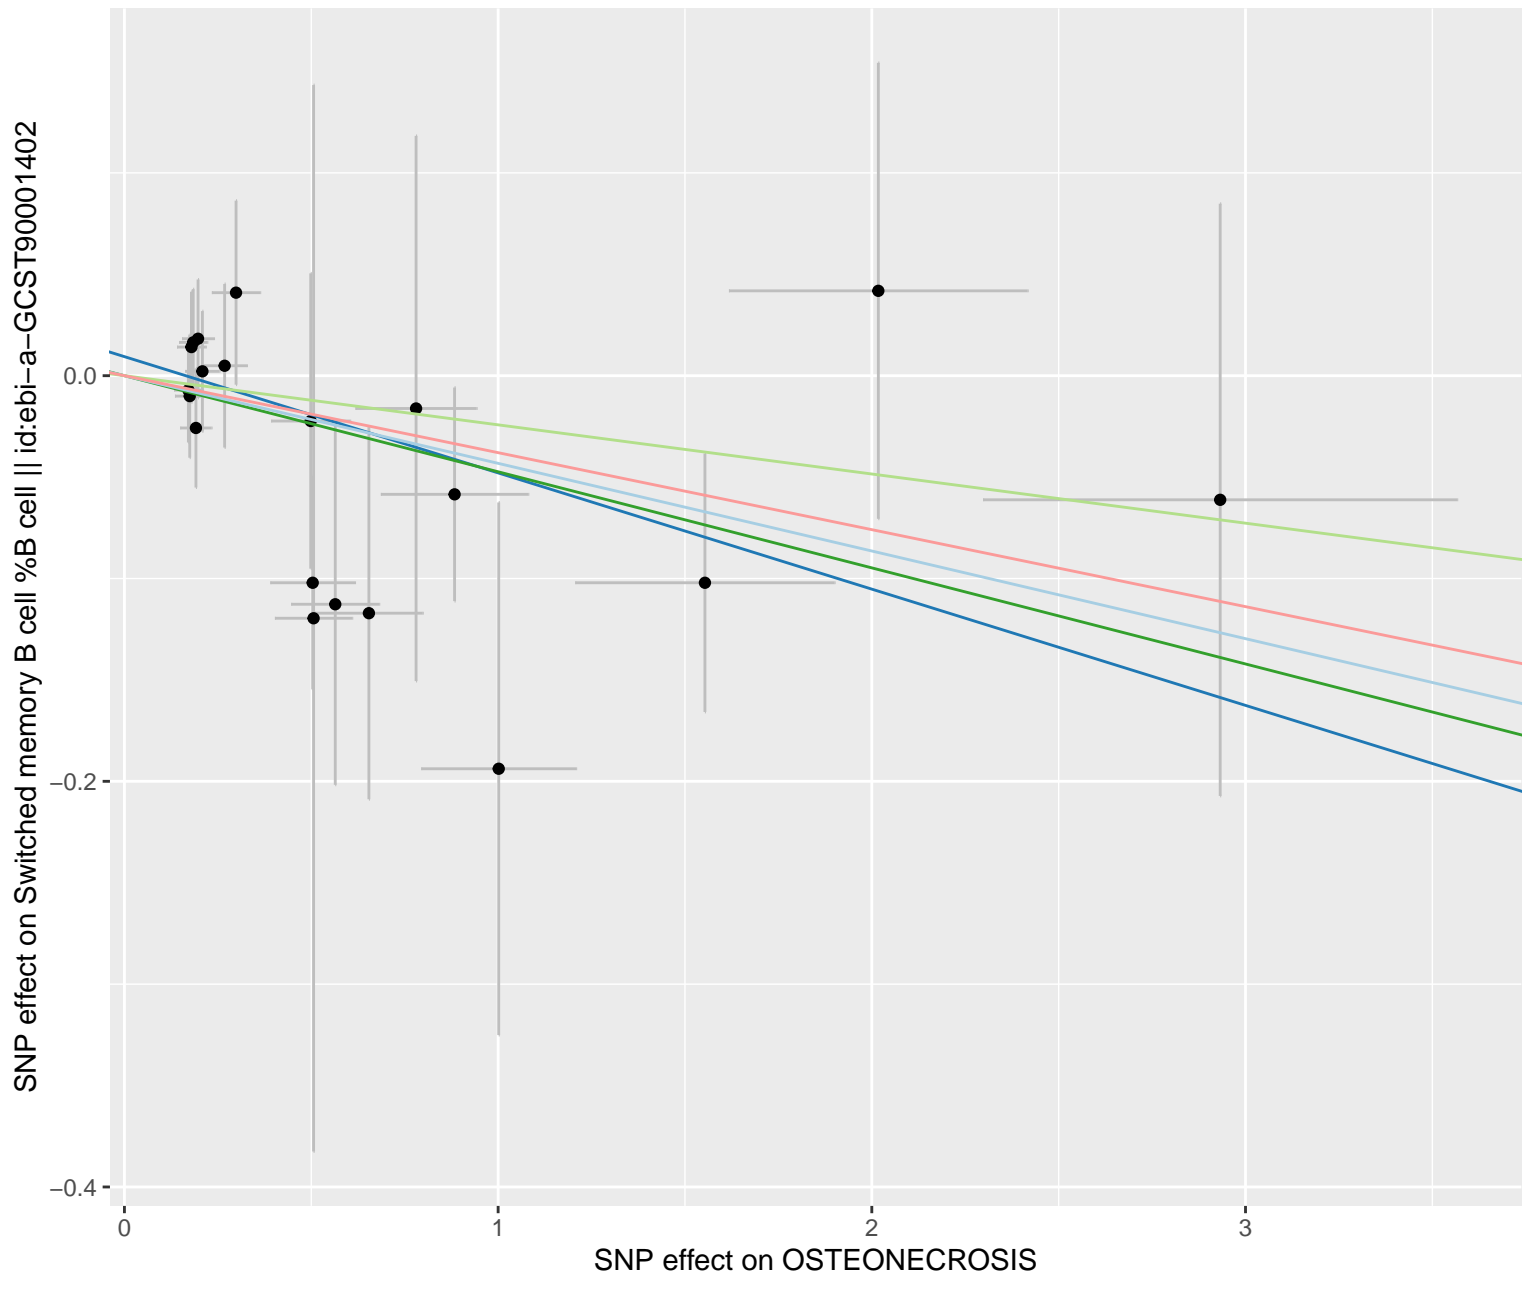

MR Method

- Inverse variance weighted
- MR Egger

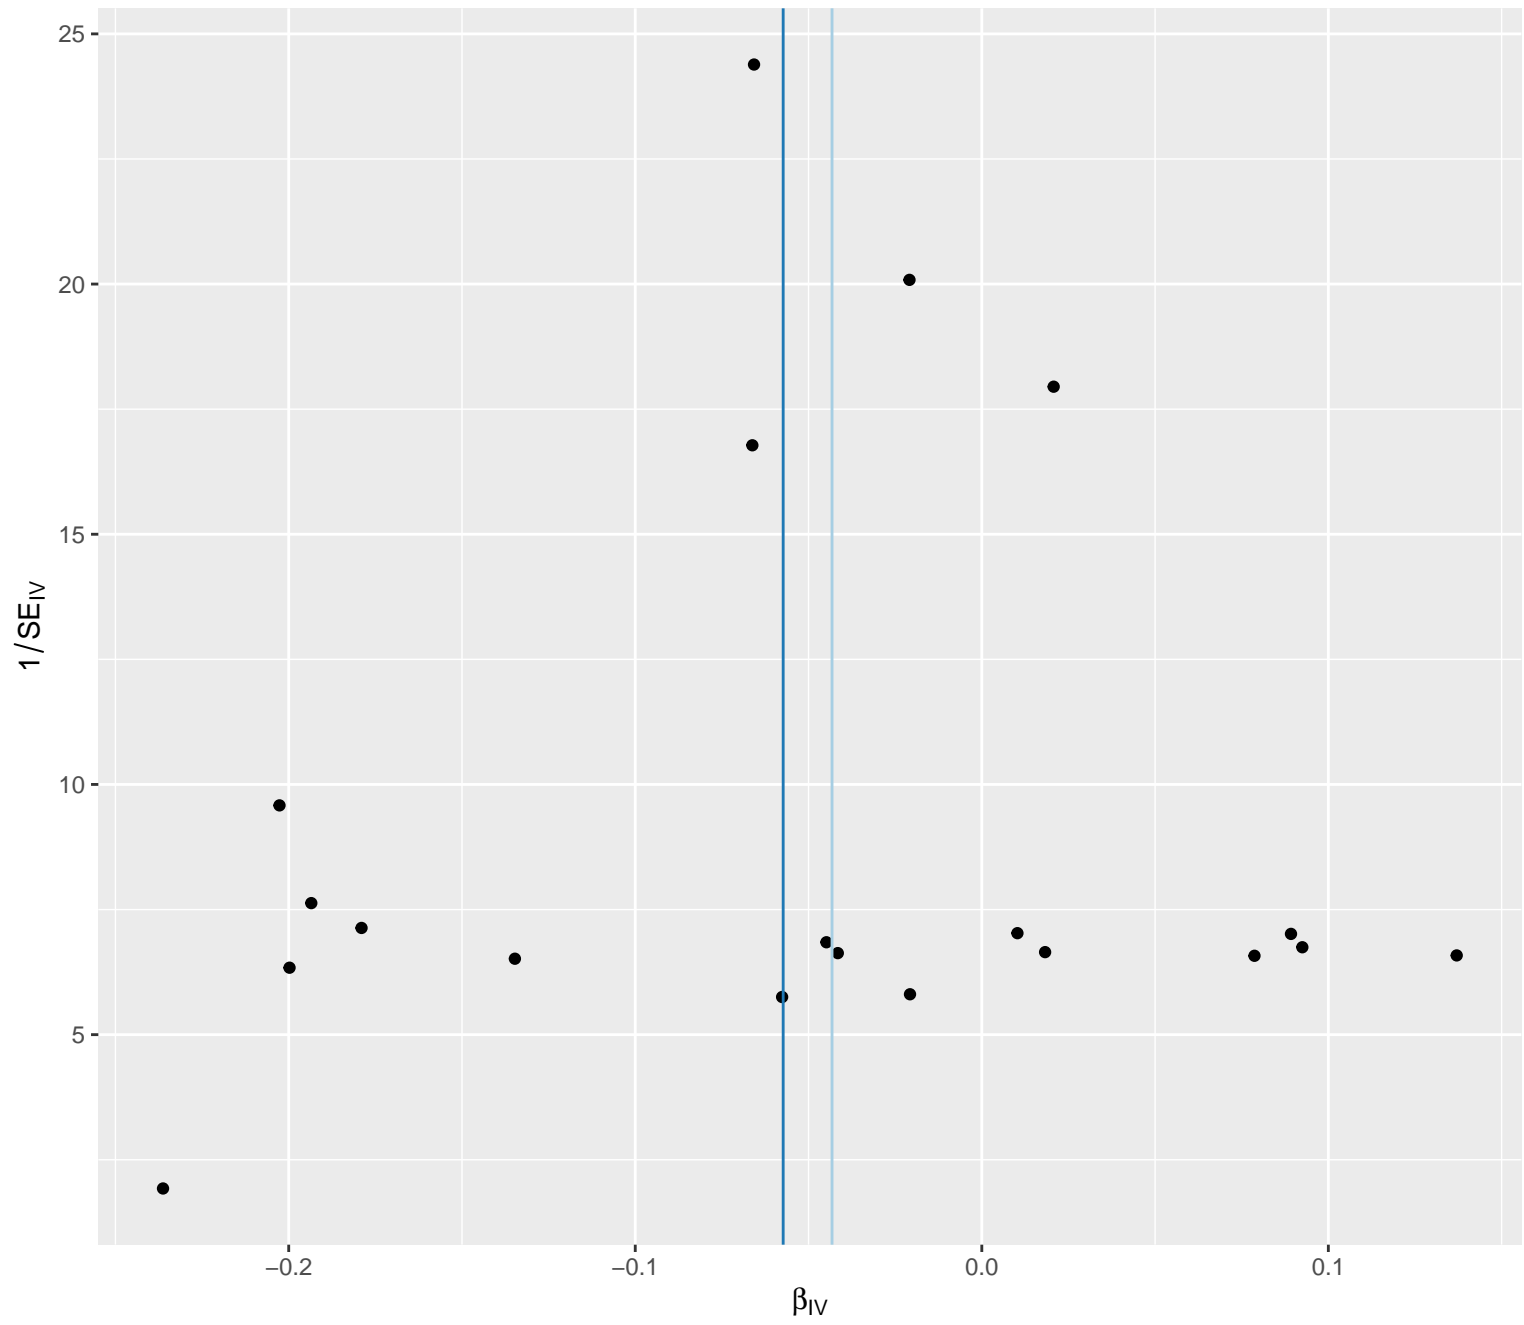

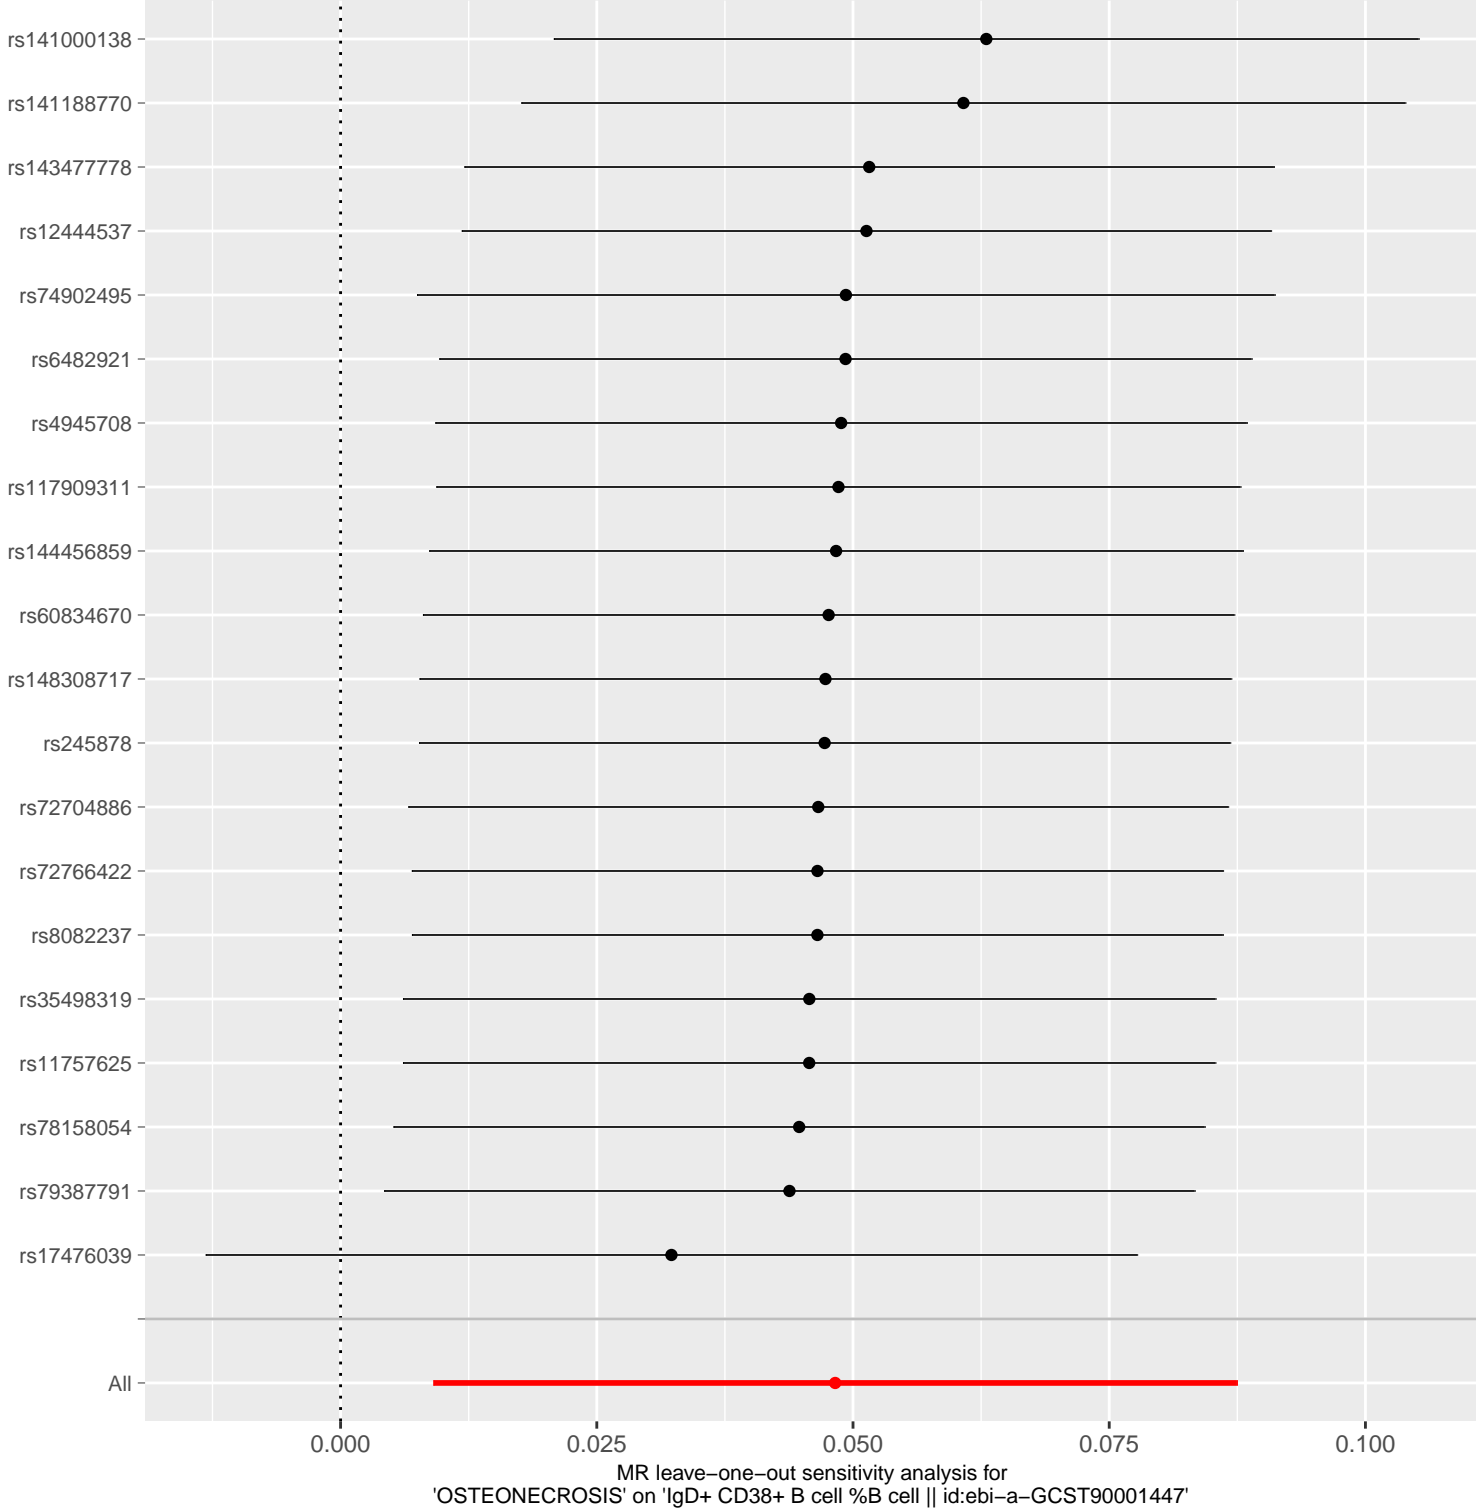

### MR Test

- Inverse variance weighted
- MR Egger
- Simple mode
- Weighted median
- Weighted mode

SNP effect on IgD+ CD38+ B cell %B cell || id:ebi-a-GCST90001447

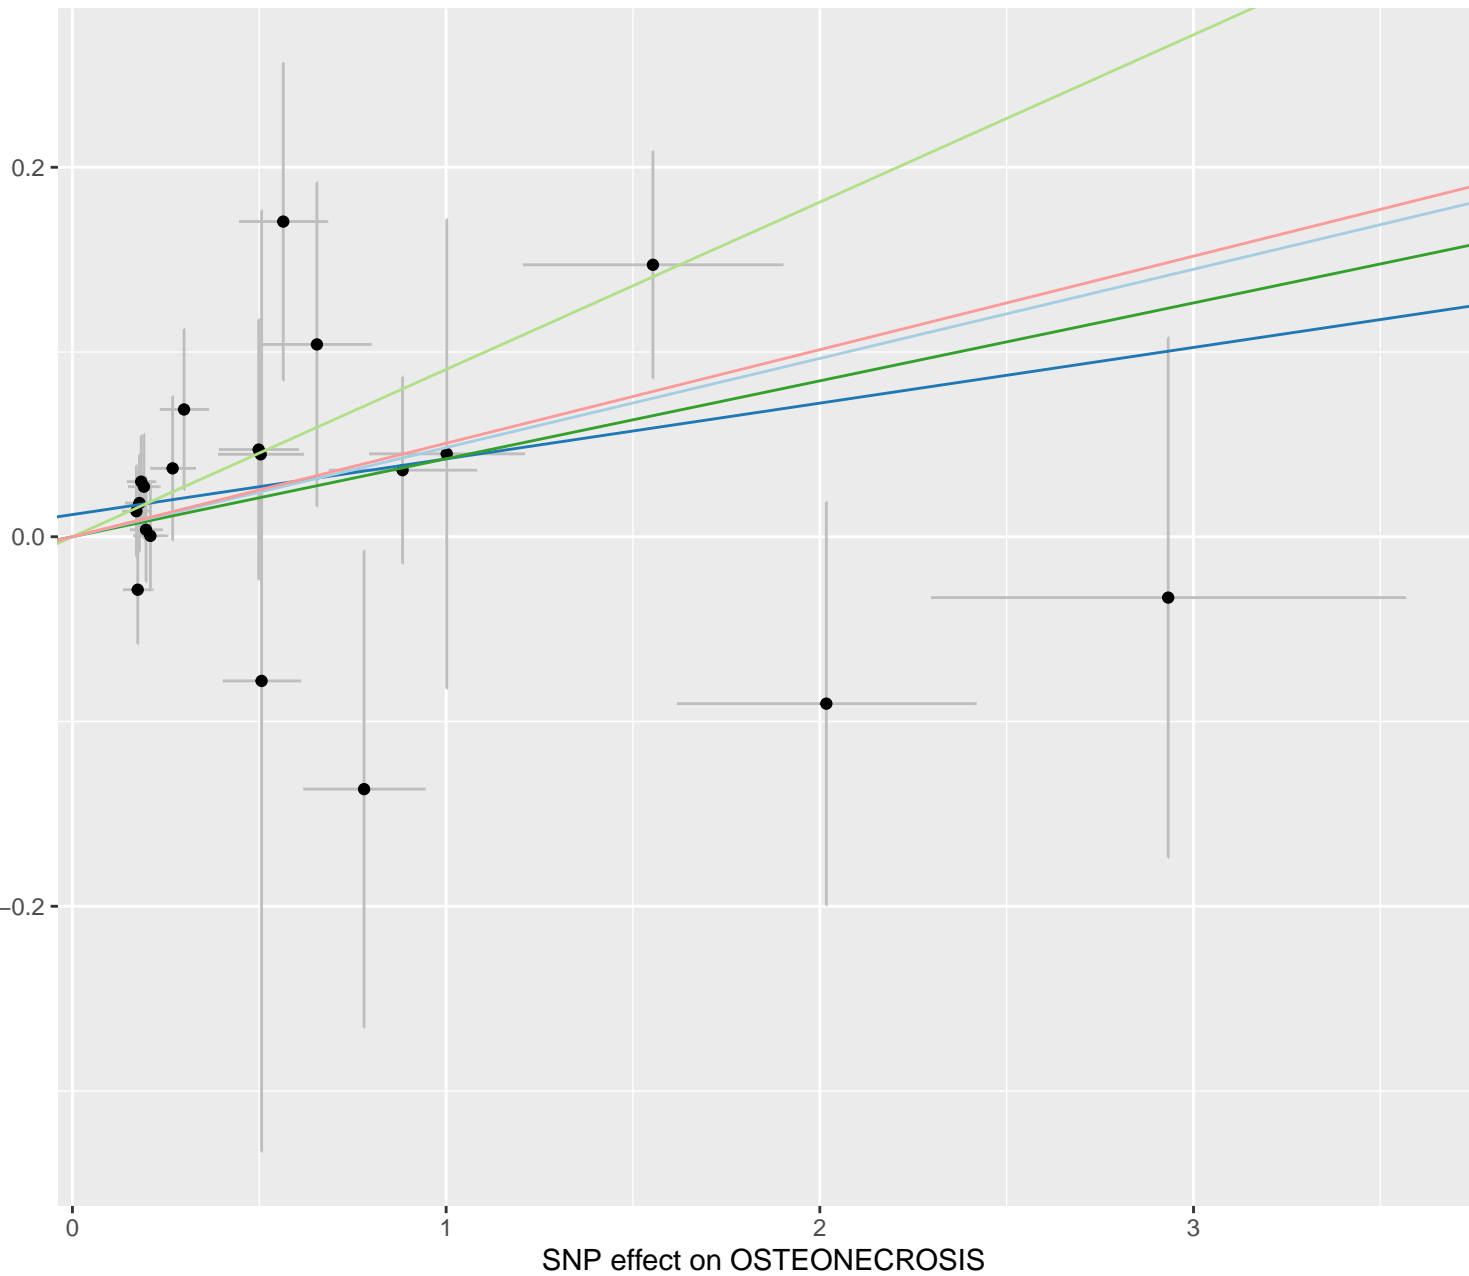

### MR Method

- Inverse variance weighted
- MR Egger

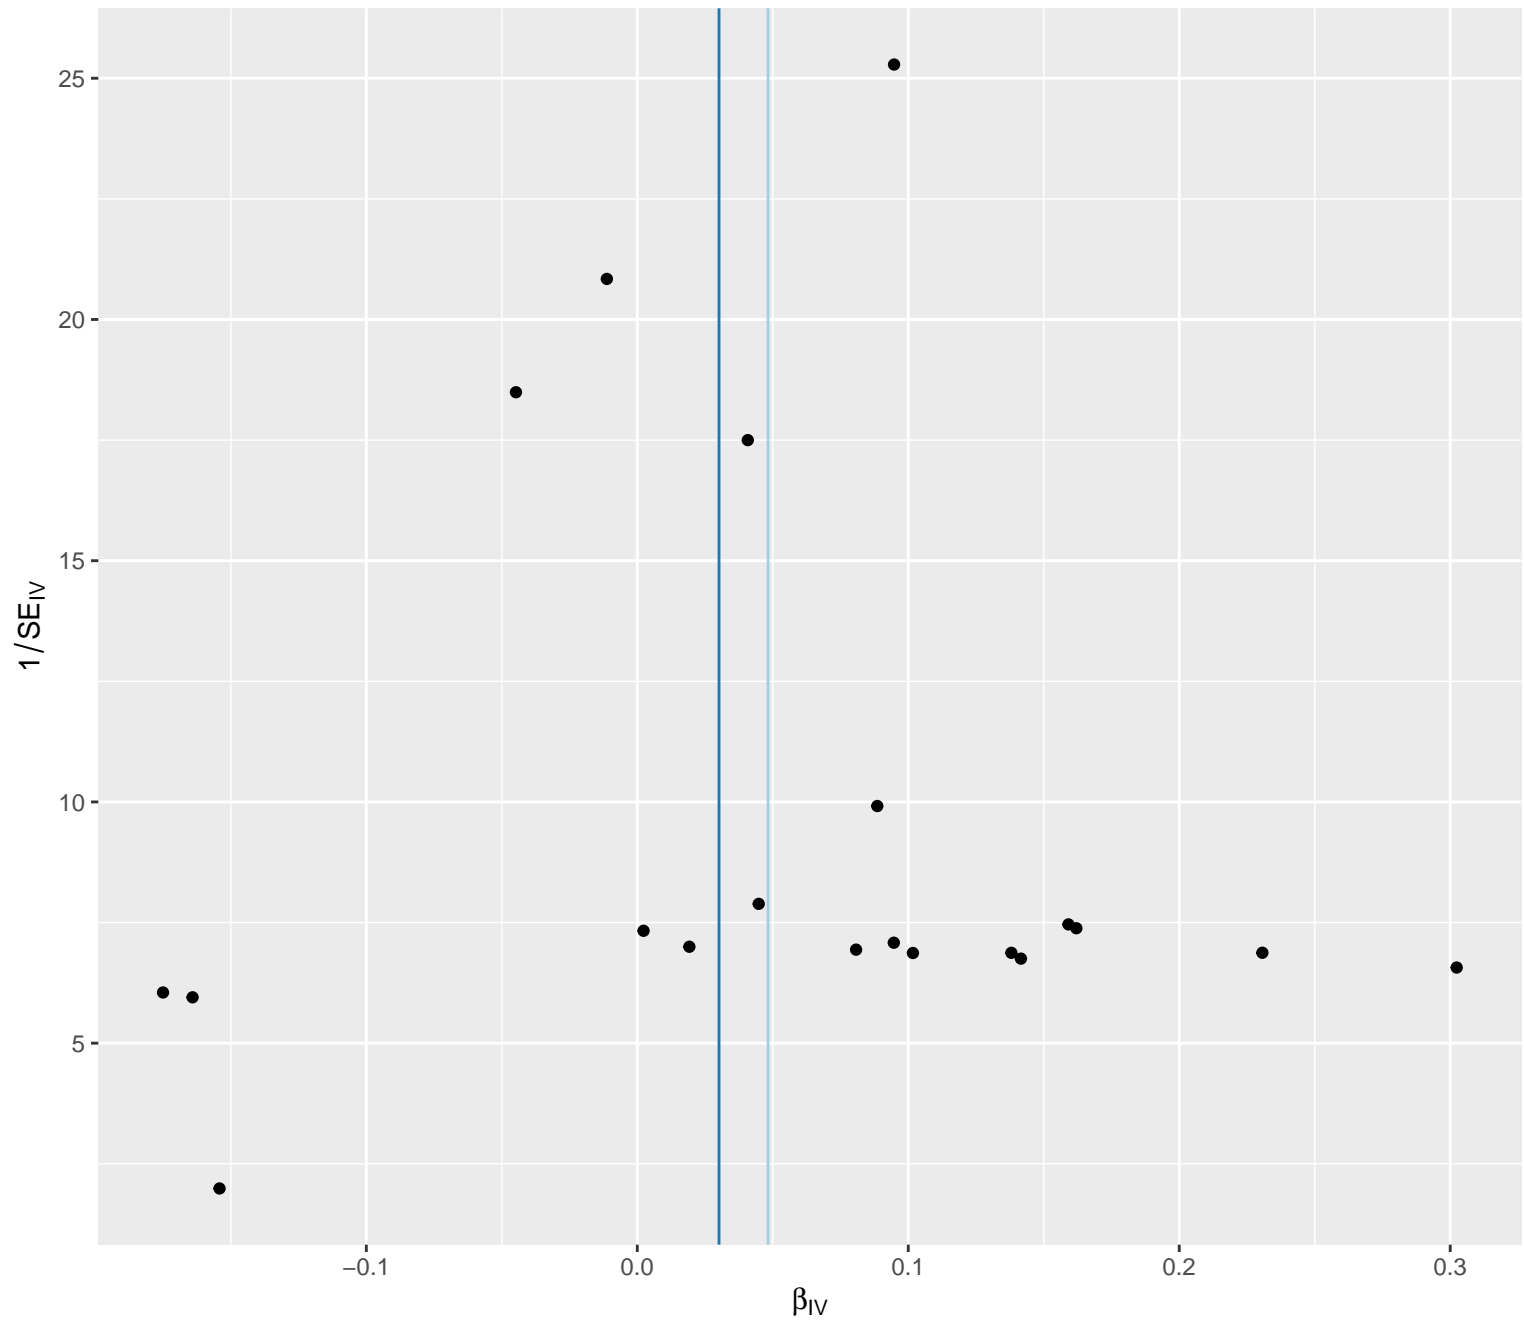

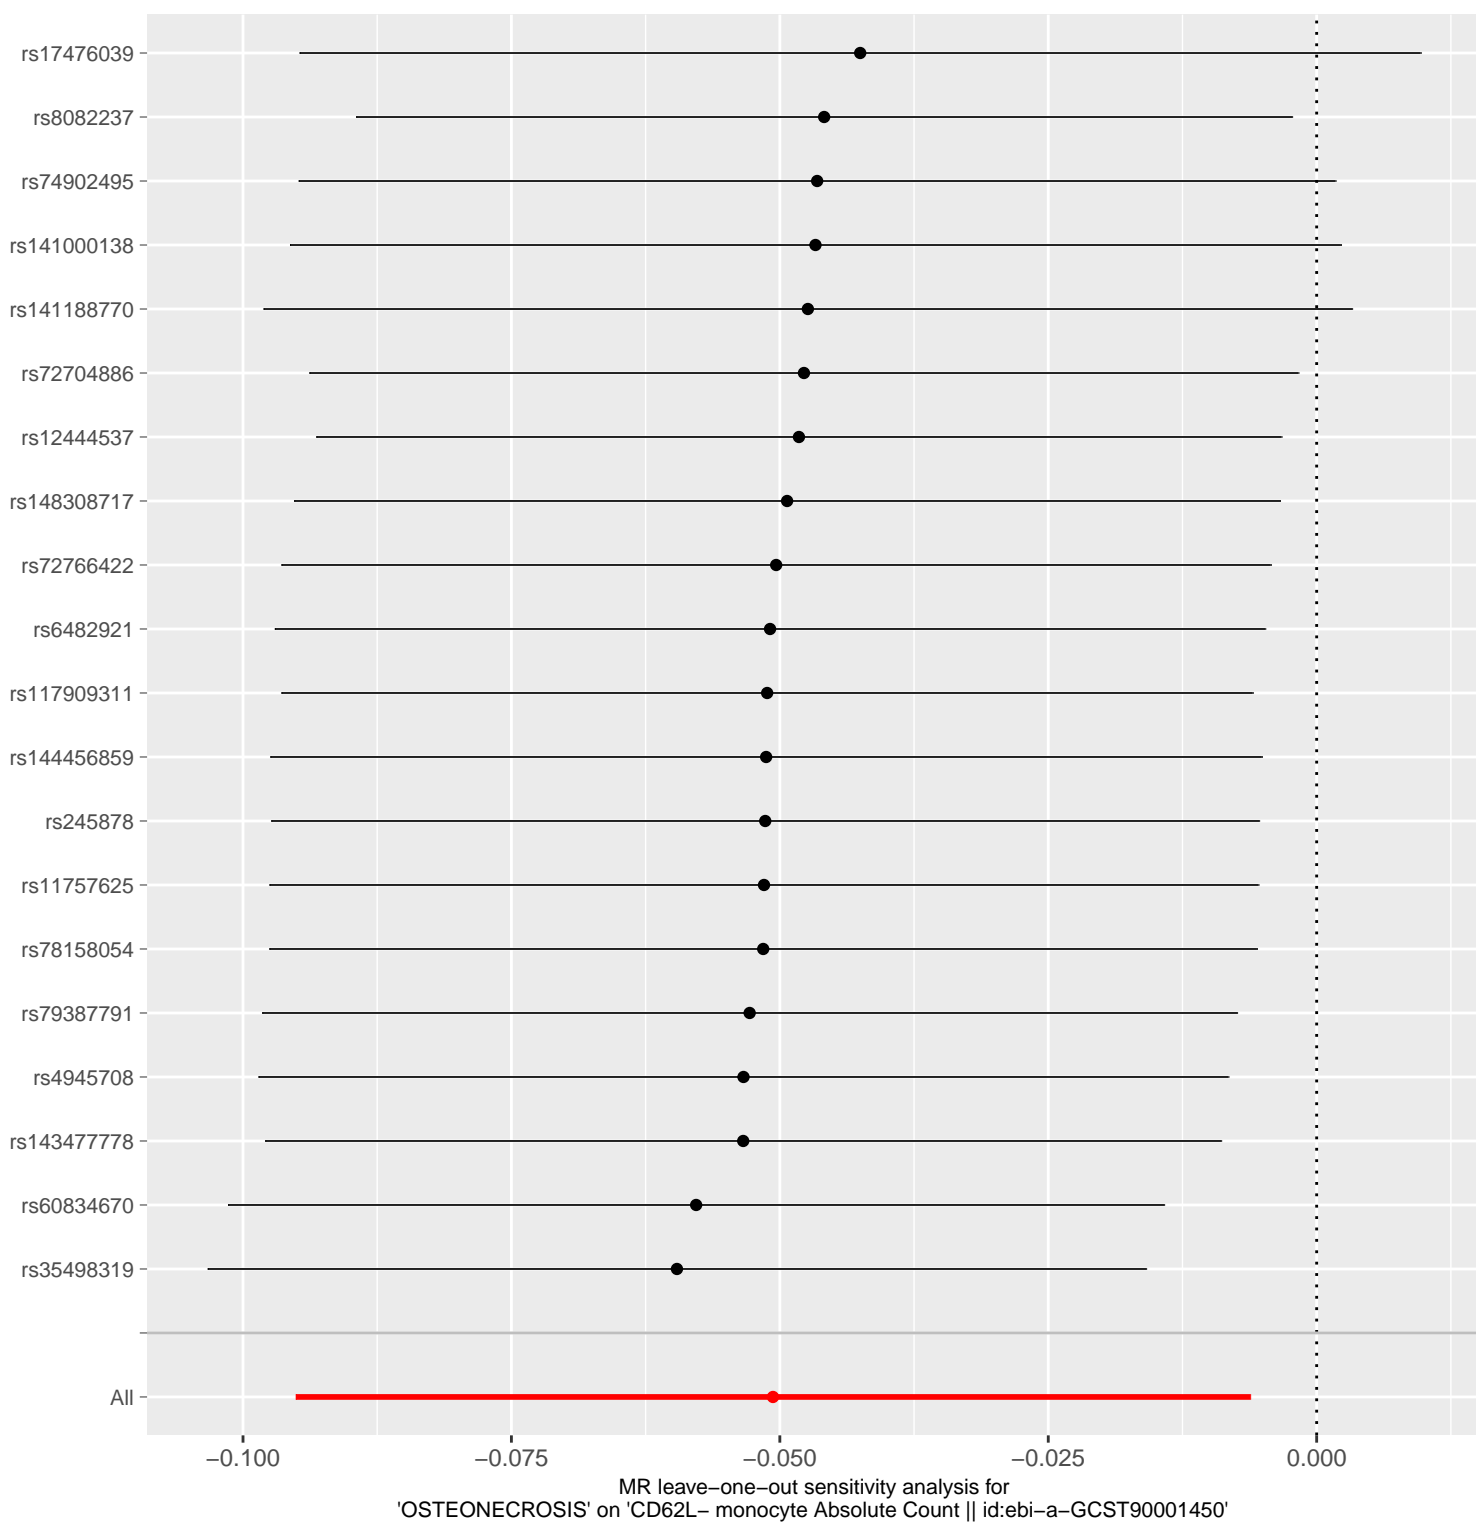

MR Test

- Inverse variance weighted
- MR Egger
- Simple mode
- Weighted median
- Weighted mode

SNP effect on CD62L- monocyte Absolute Count || id:ebi-a-GCST90001450

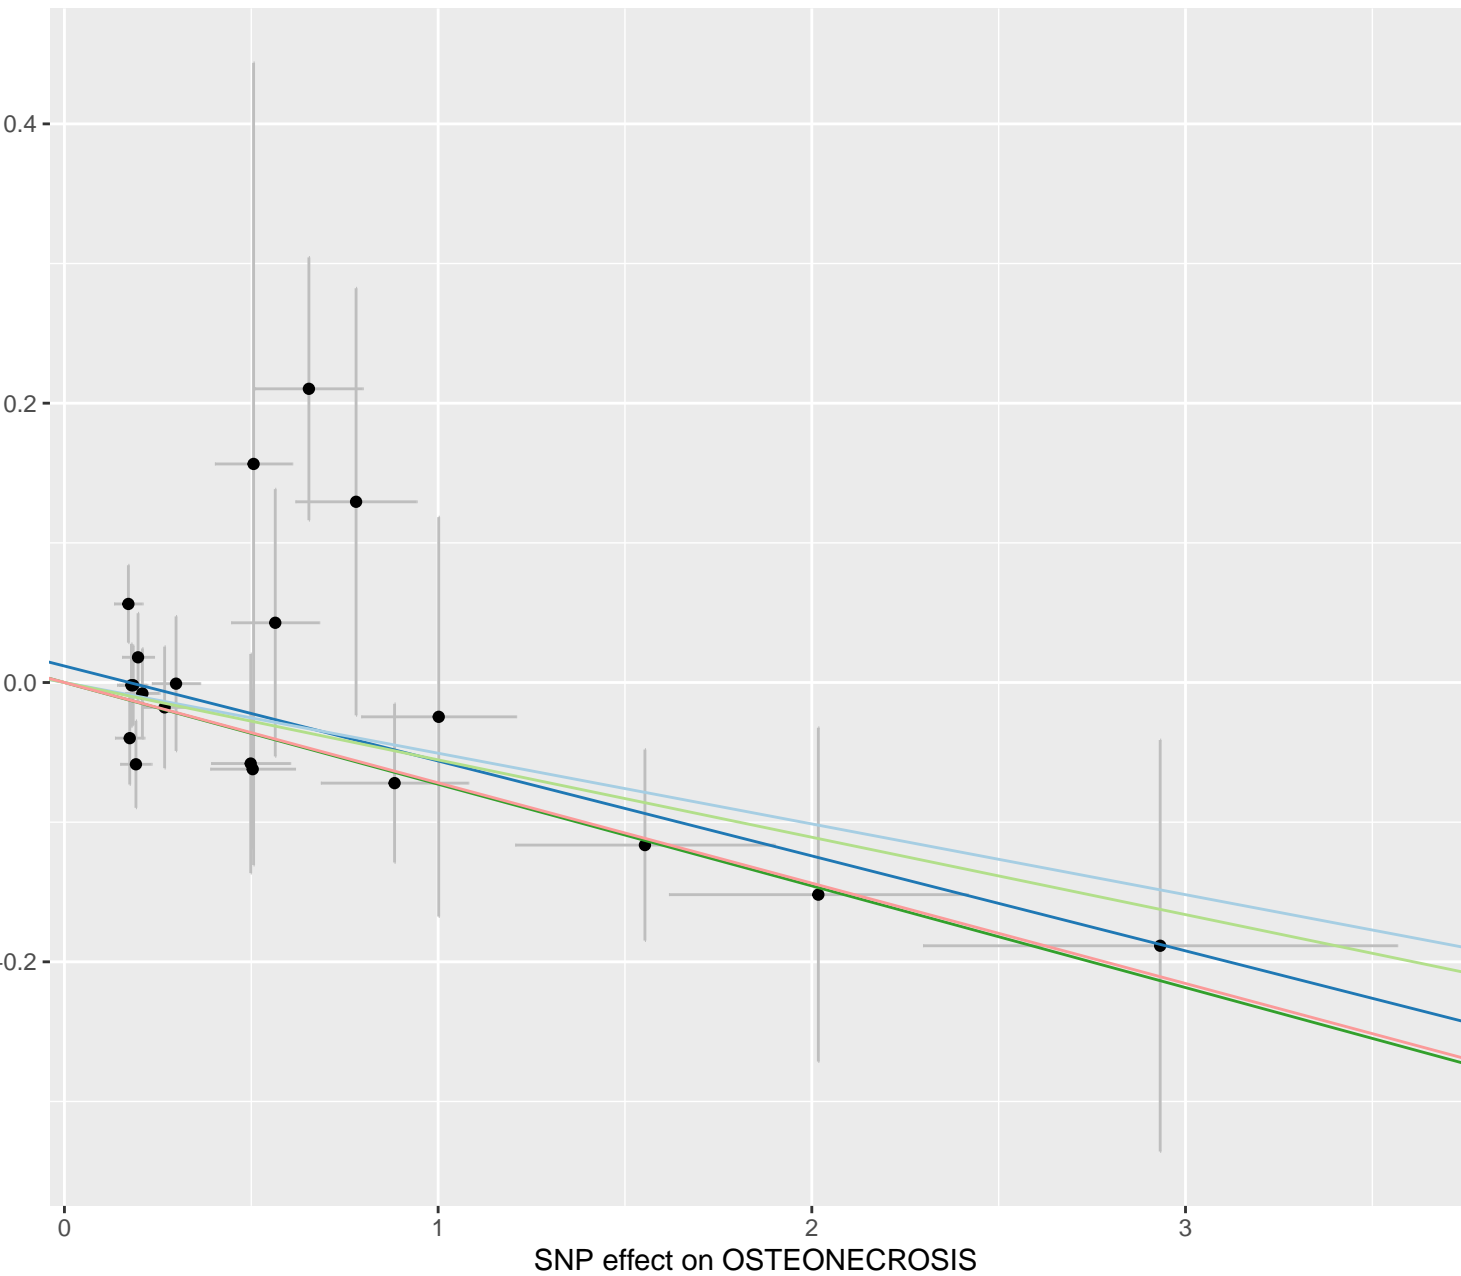



MR Method

- Inverse variance weighted
- MR Egger

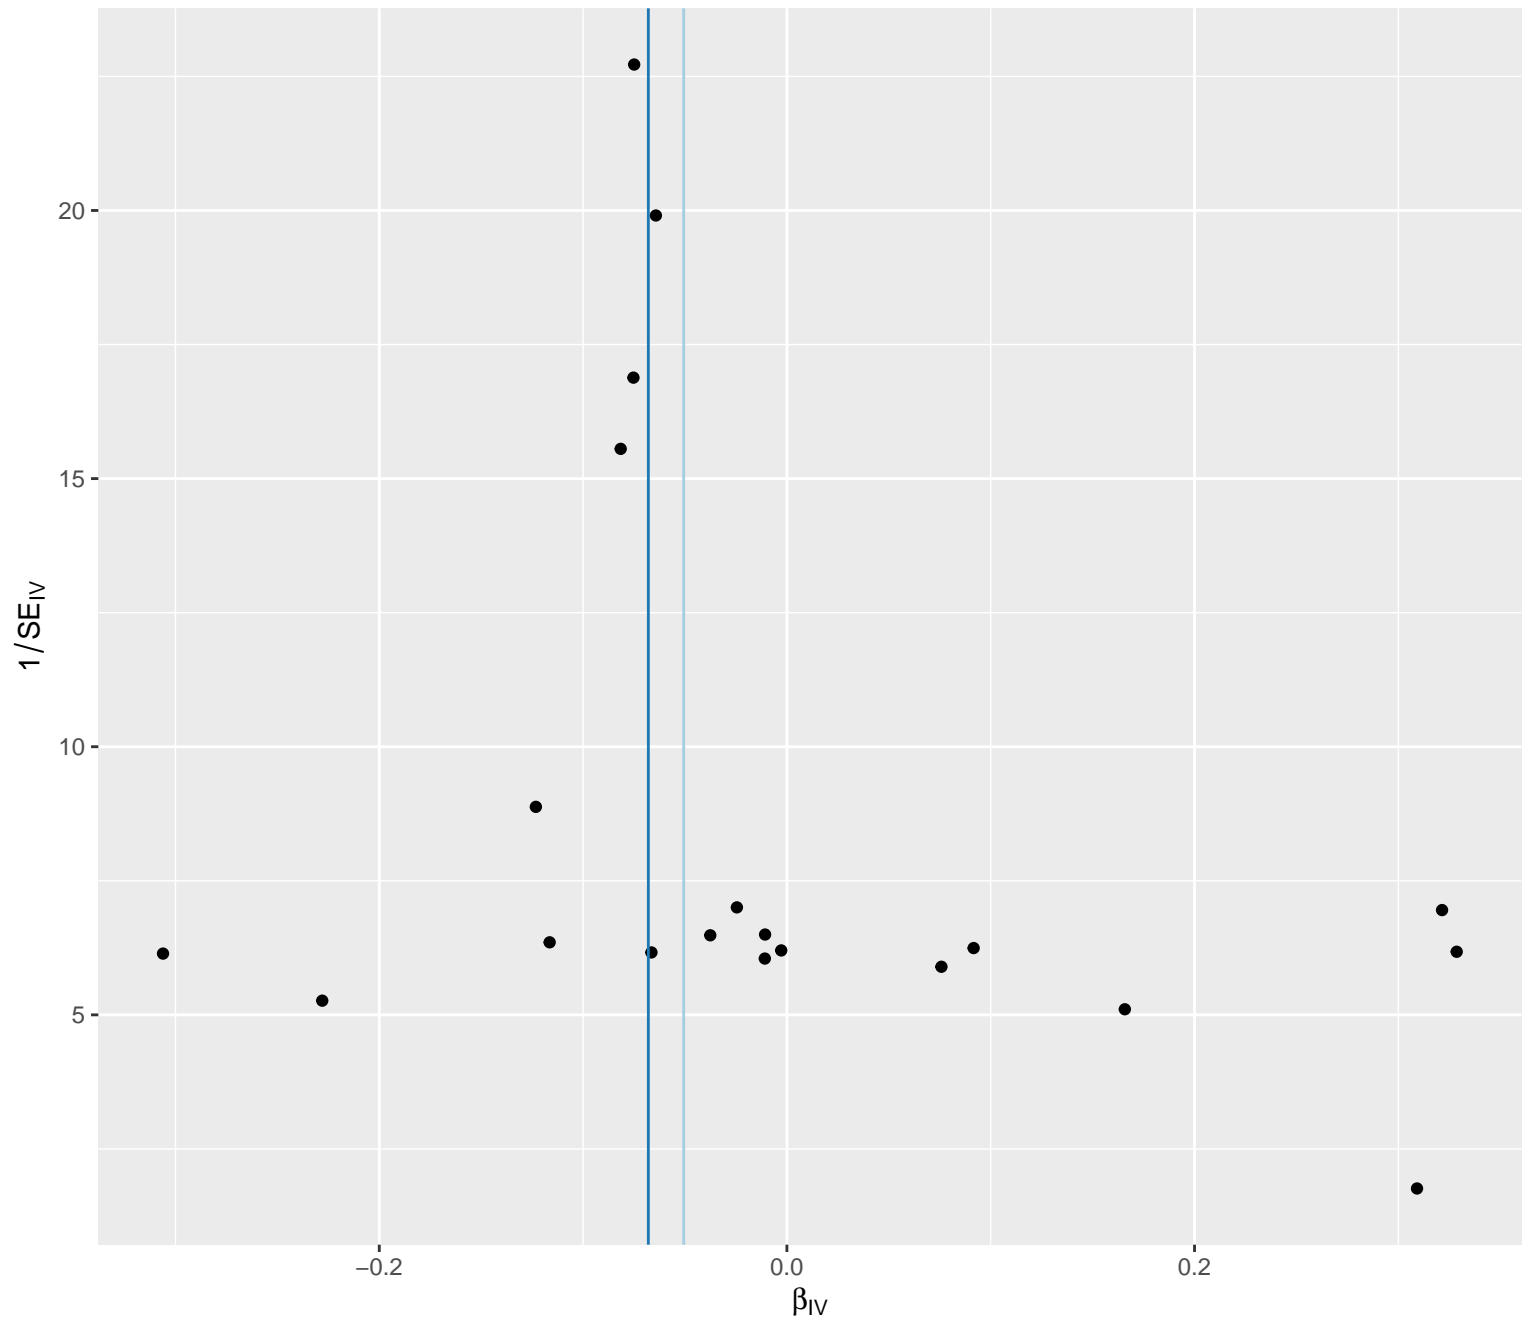

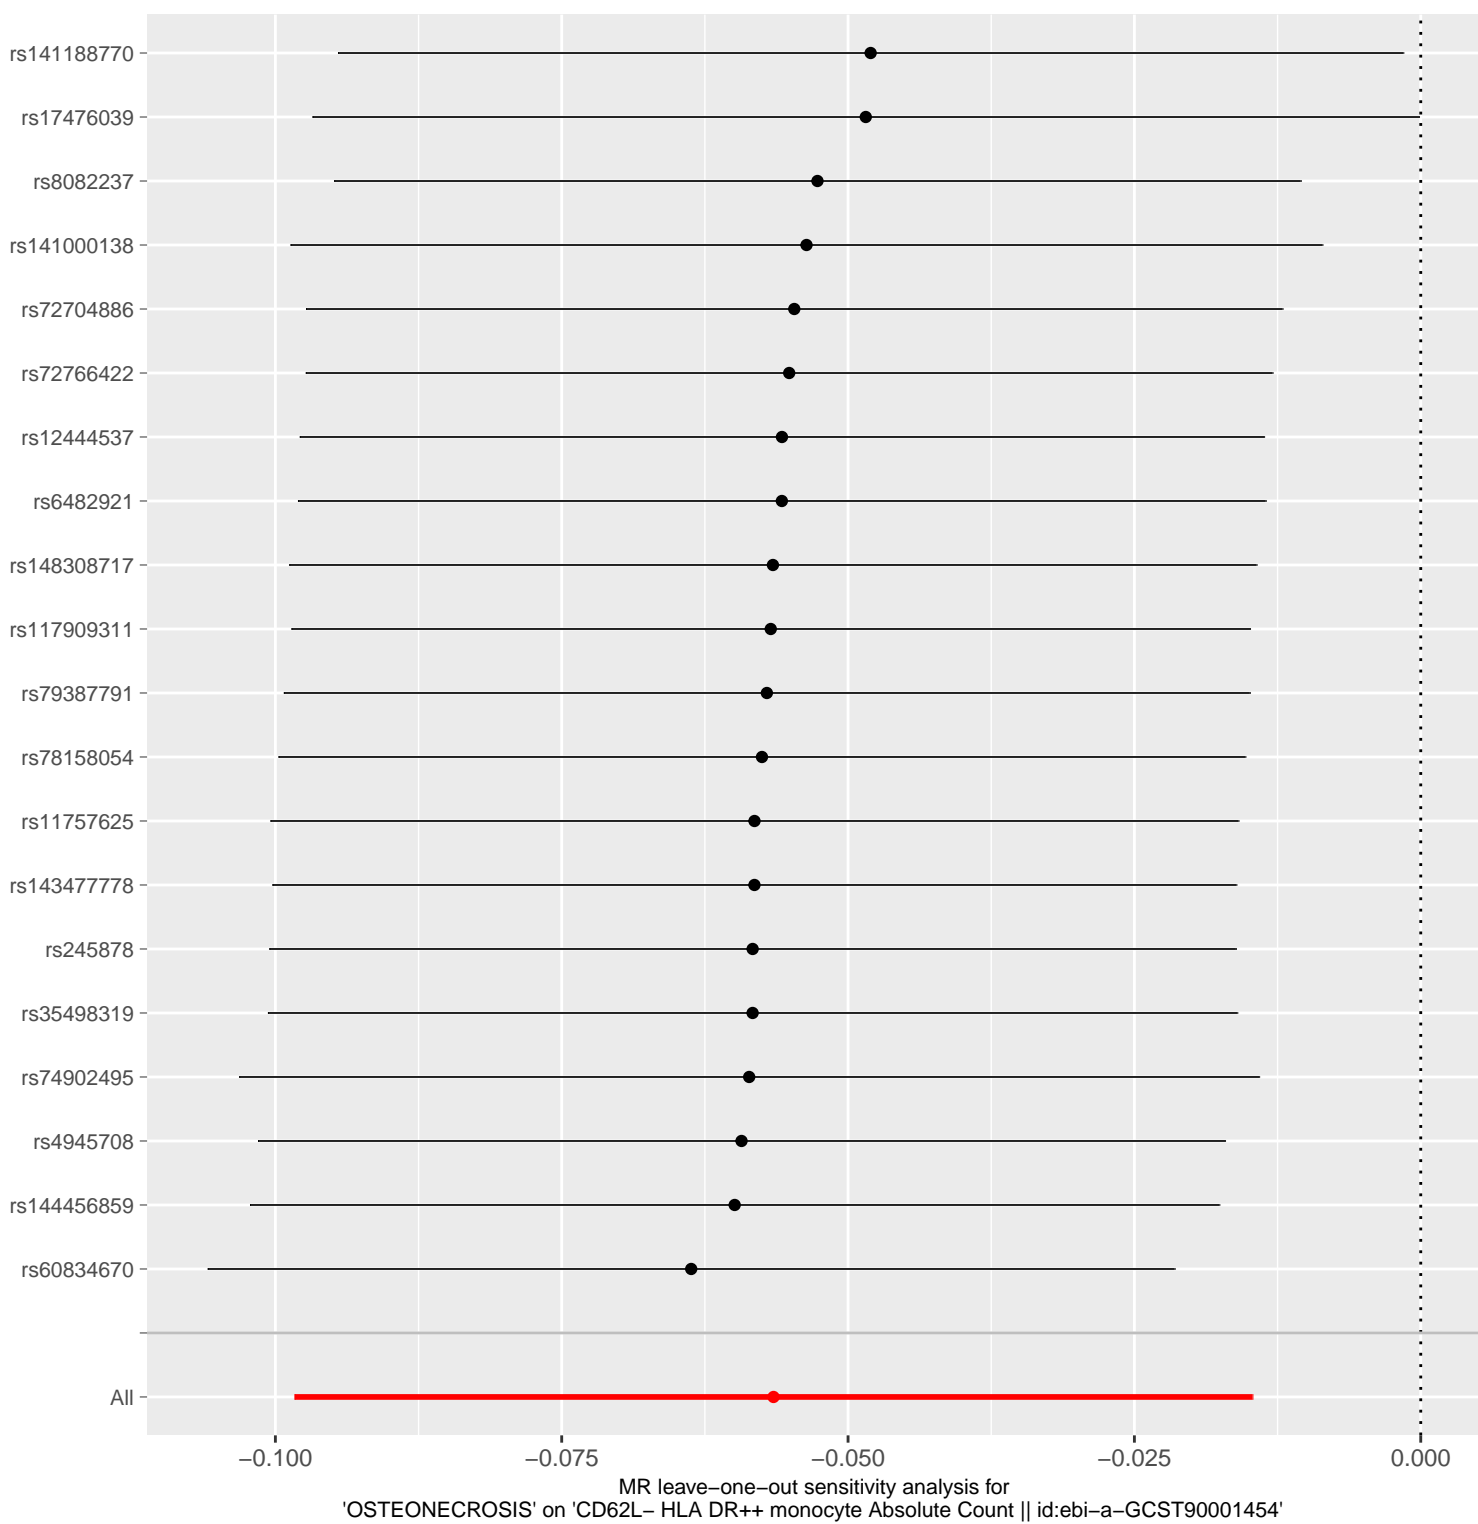

MR Test

- Inverse variance weighted
- MR Egger
- Simple mode
- Weighted median
- Weighted mode

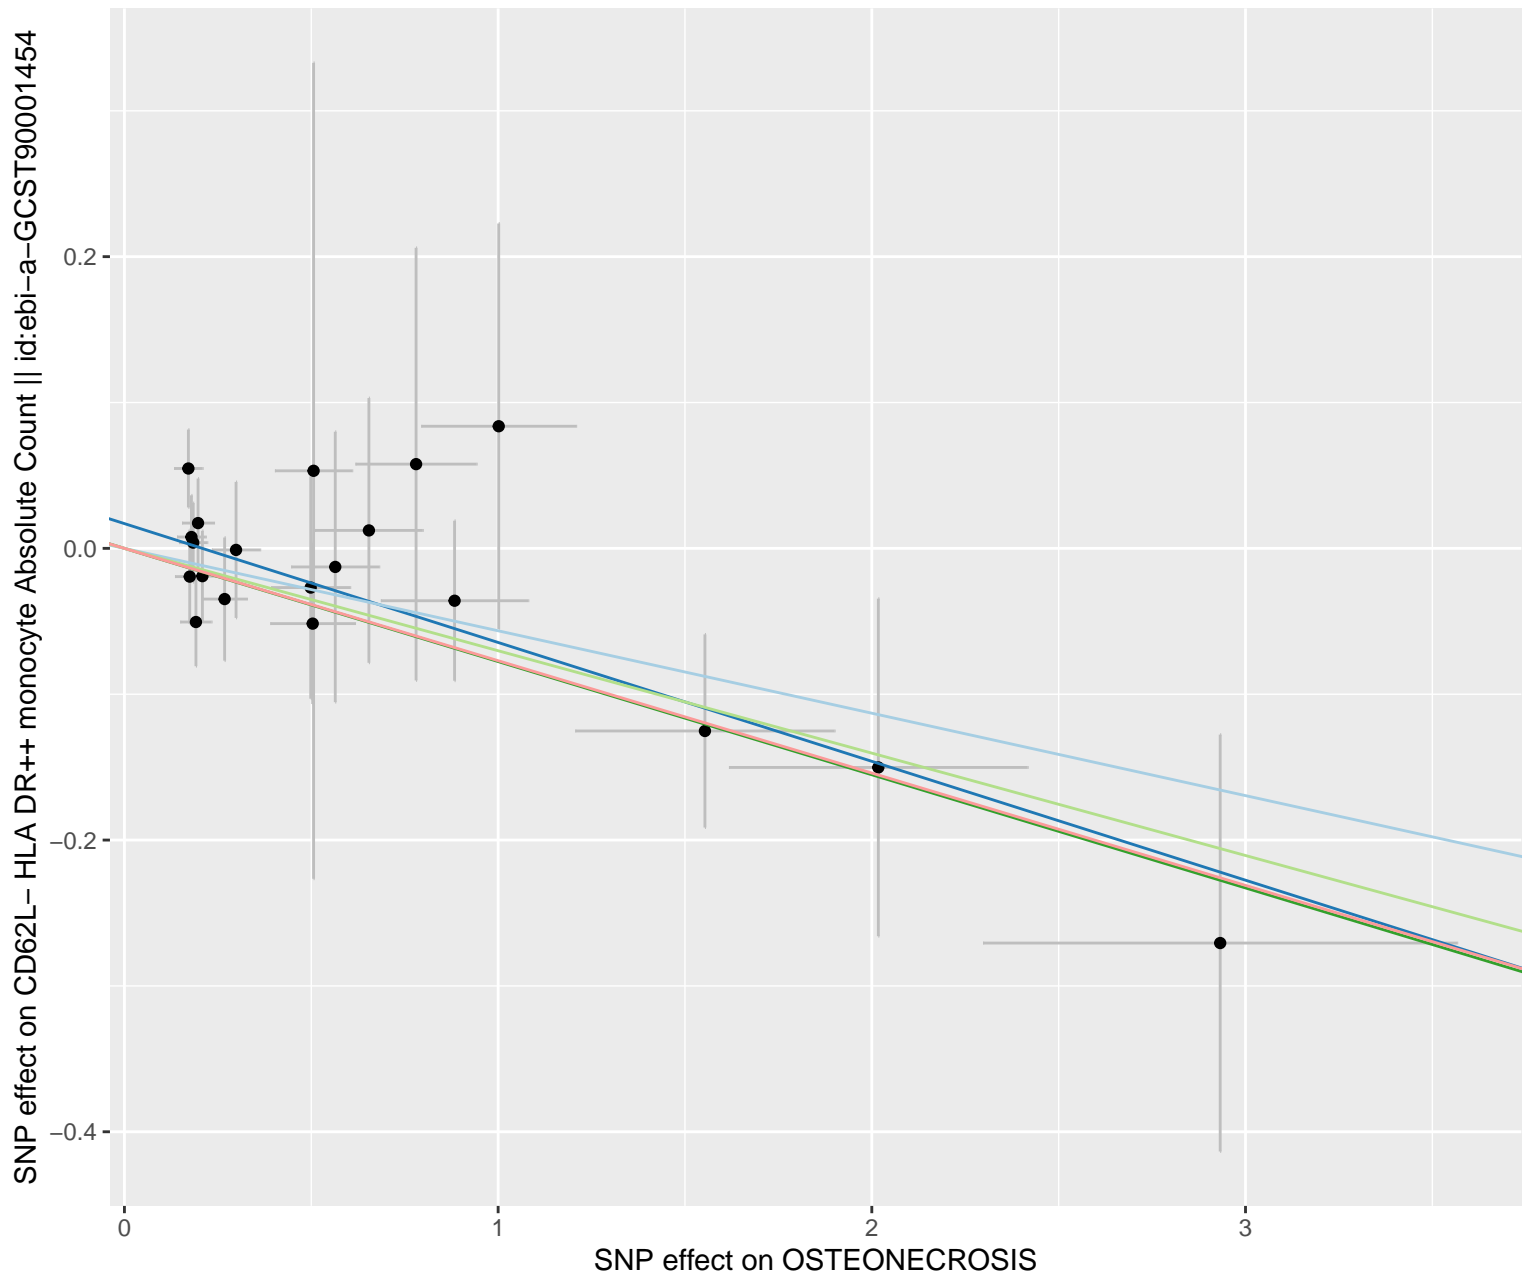

### MR Method

- Inverse variance weighted
- MR Egger

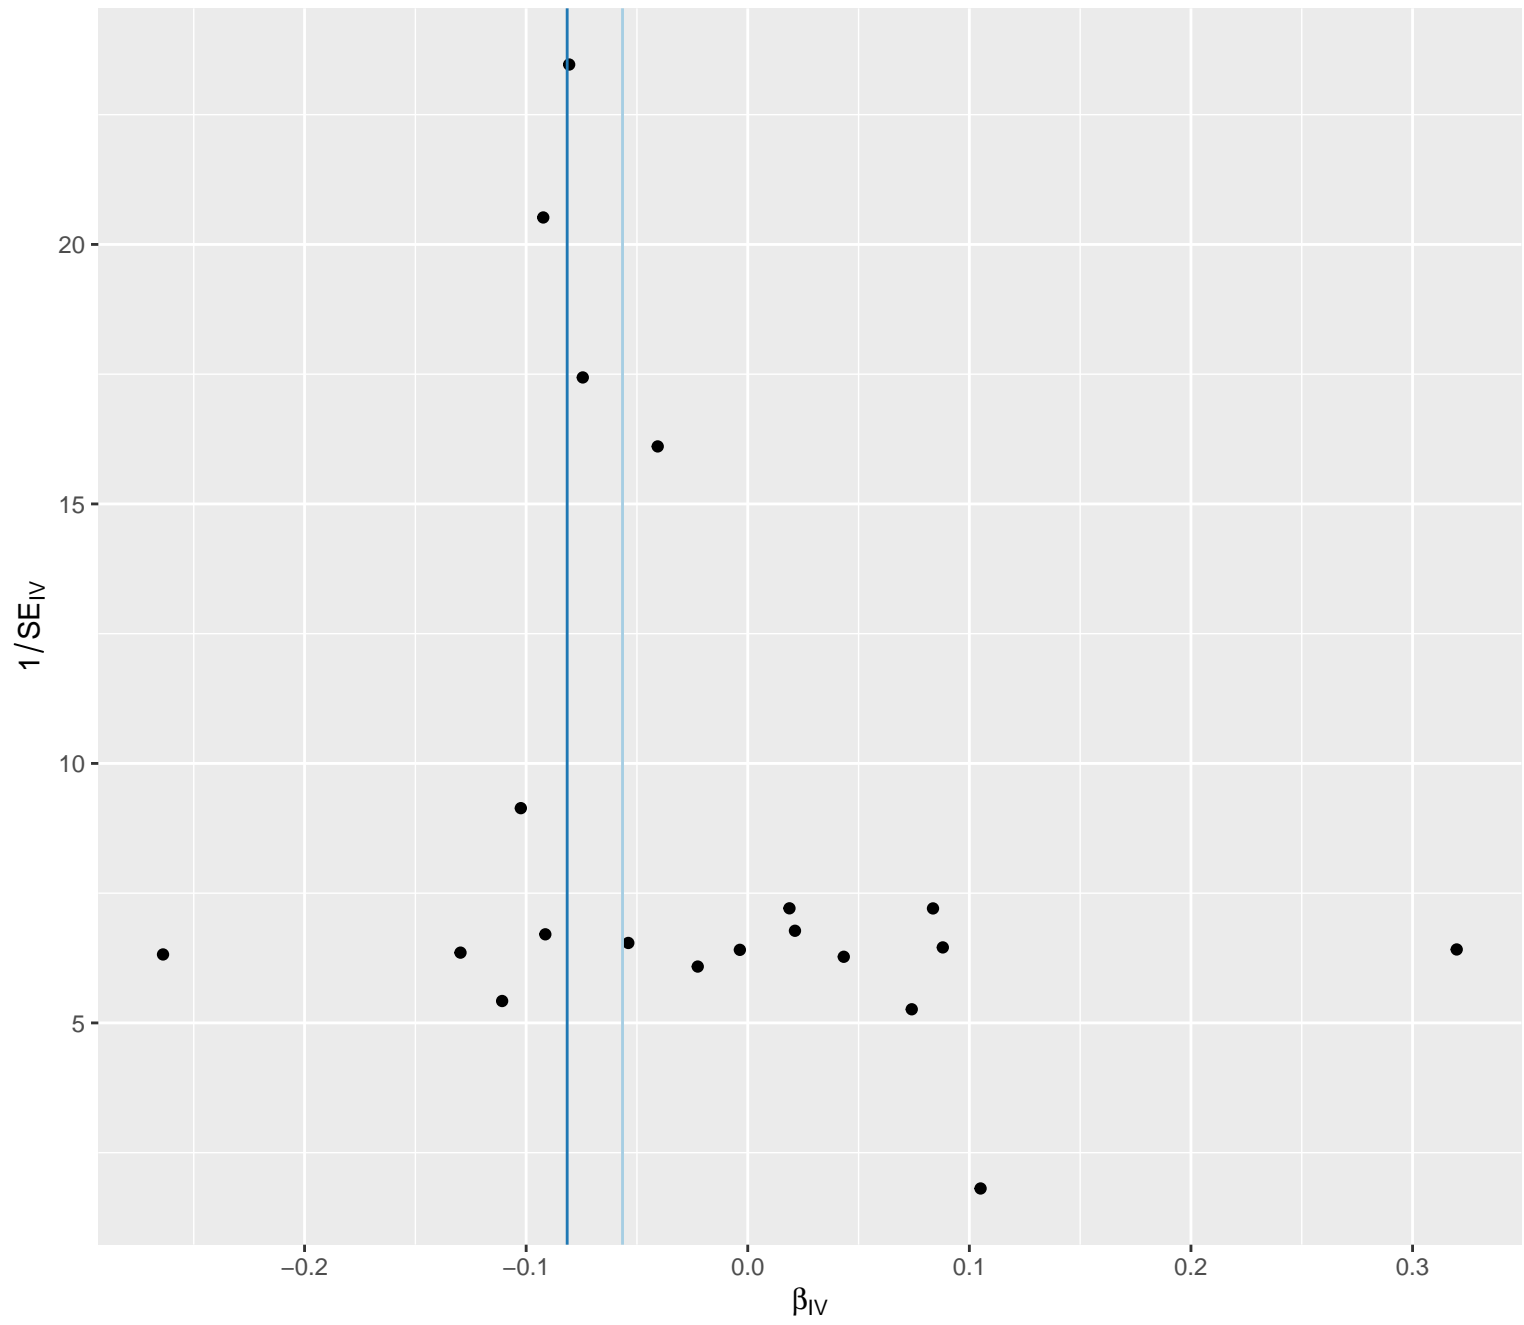

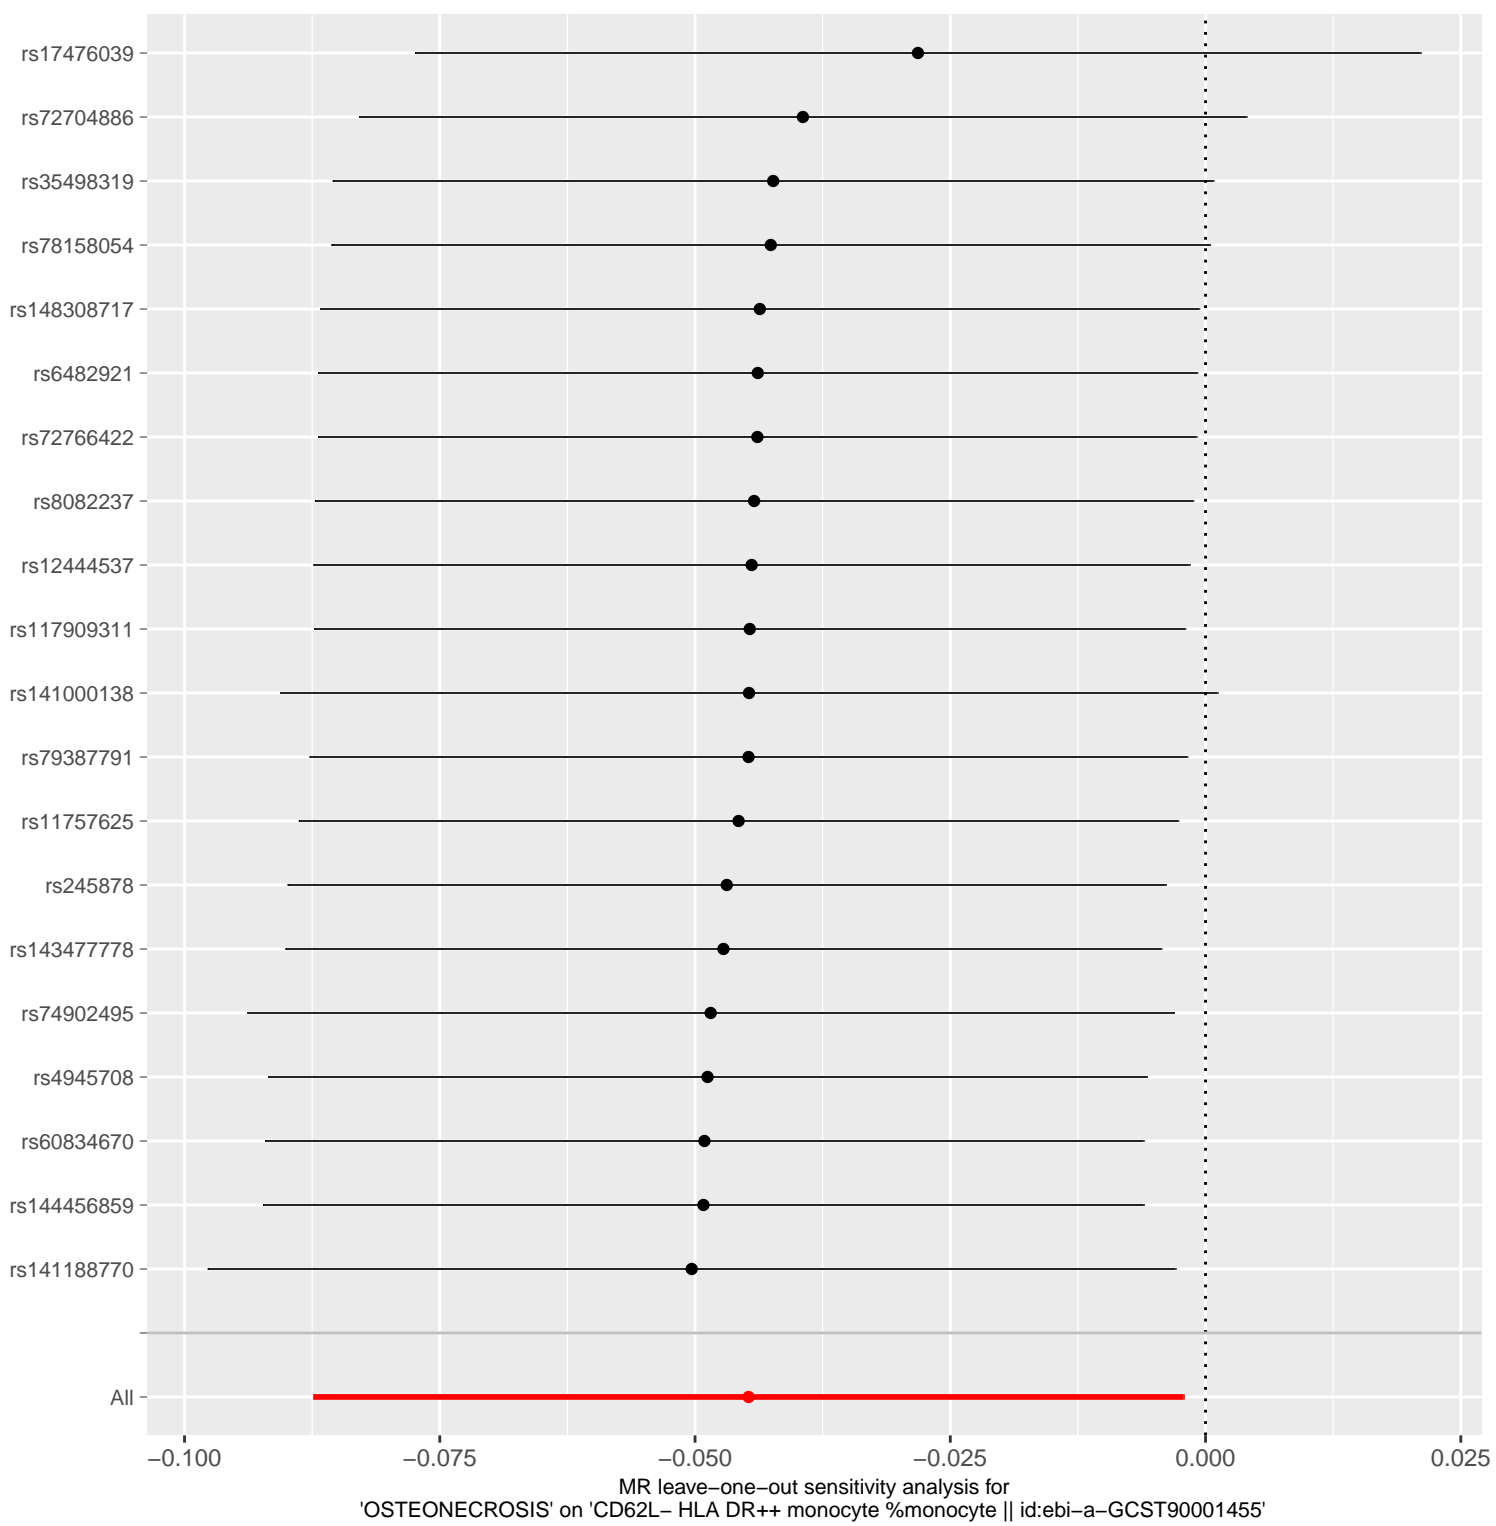

### MR Test

- Inverse variance weighted
- MR Egger
- Simple mode
- Weighted median
- Weighted mode

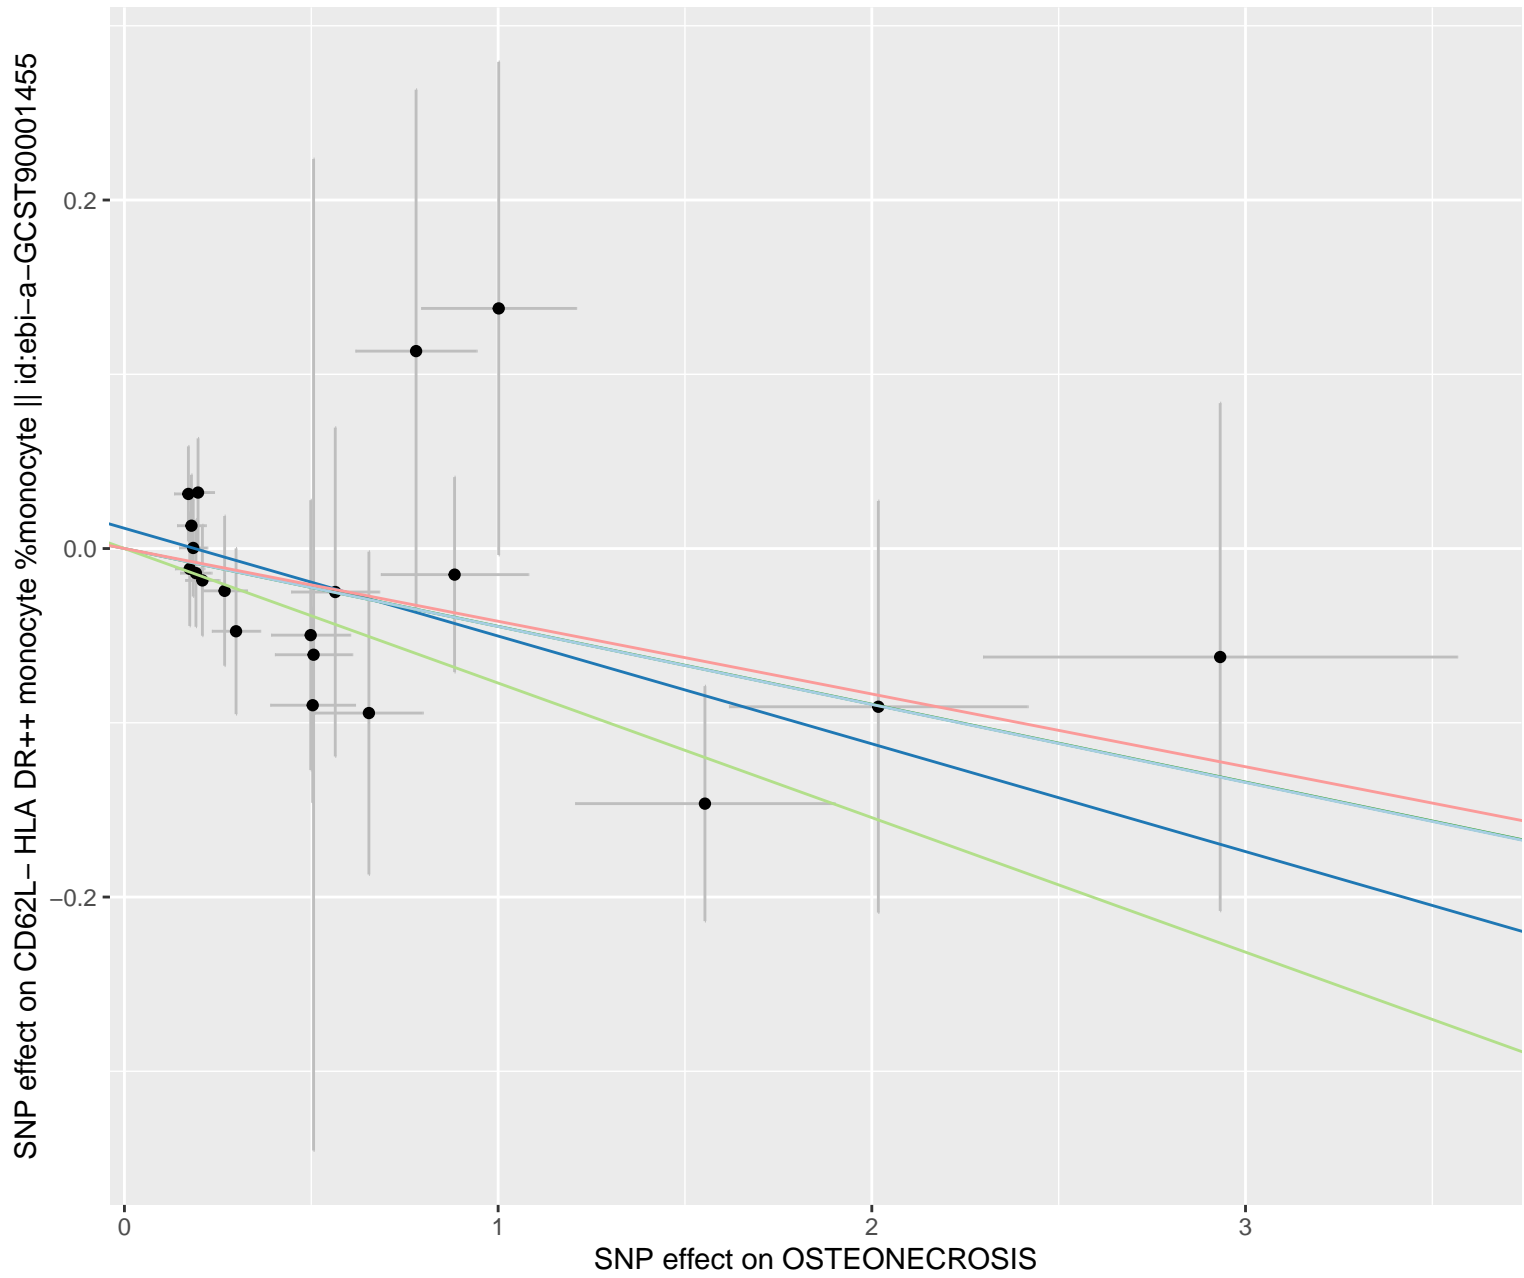

### MR Method

- Inverse variance weighted
- MR Egger

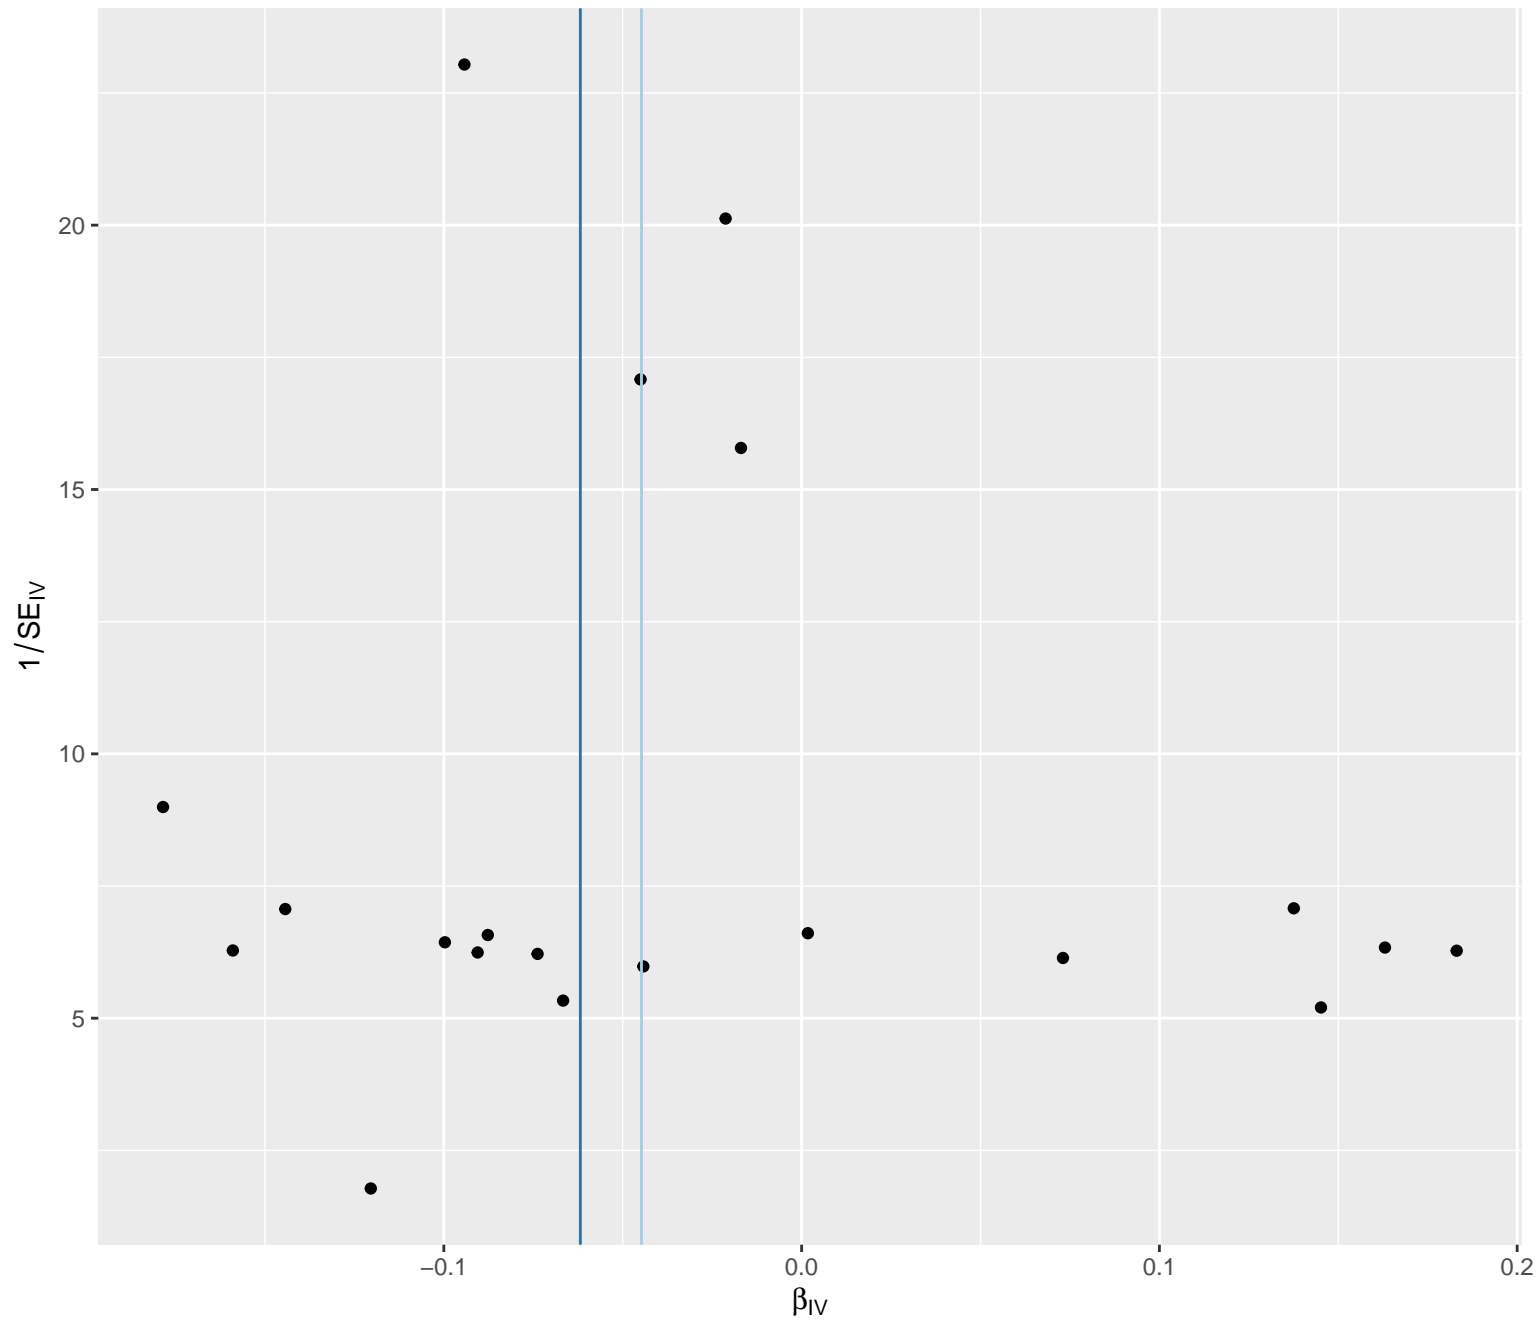

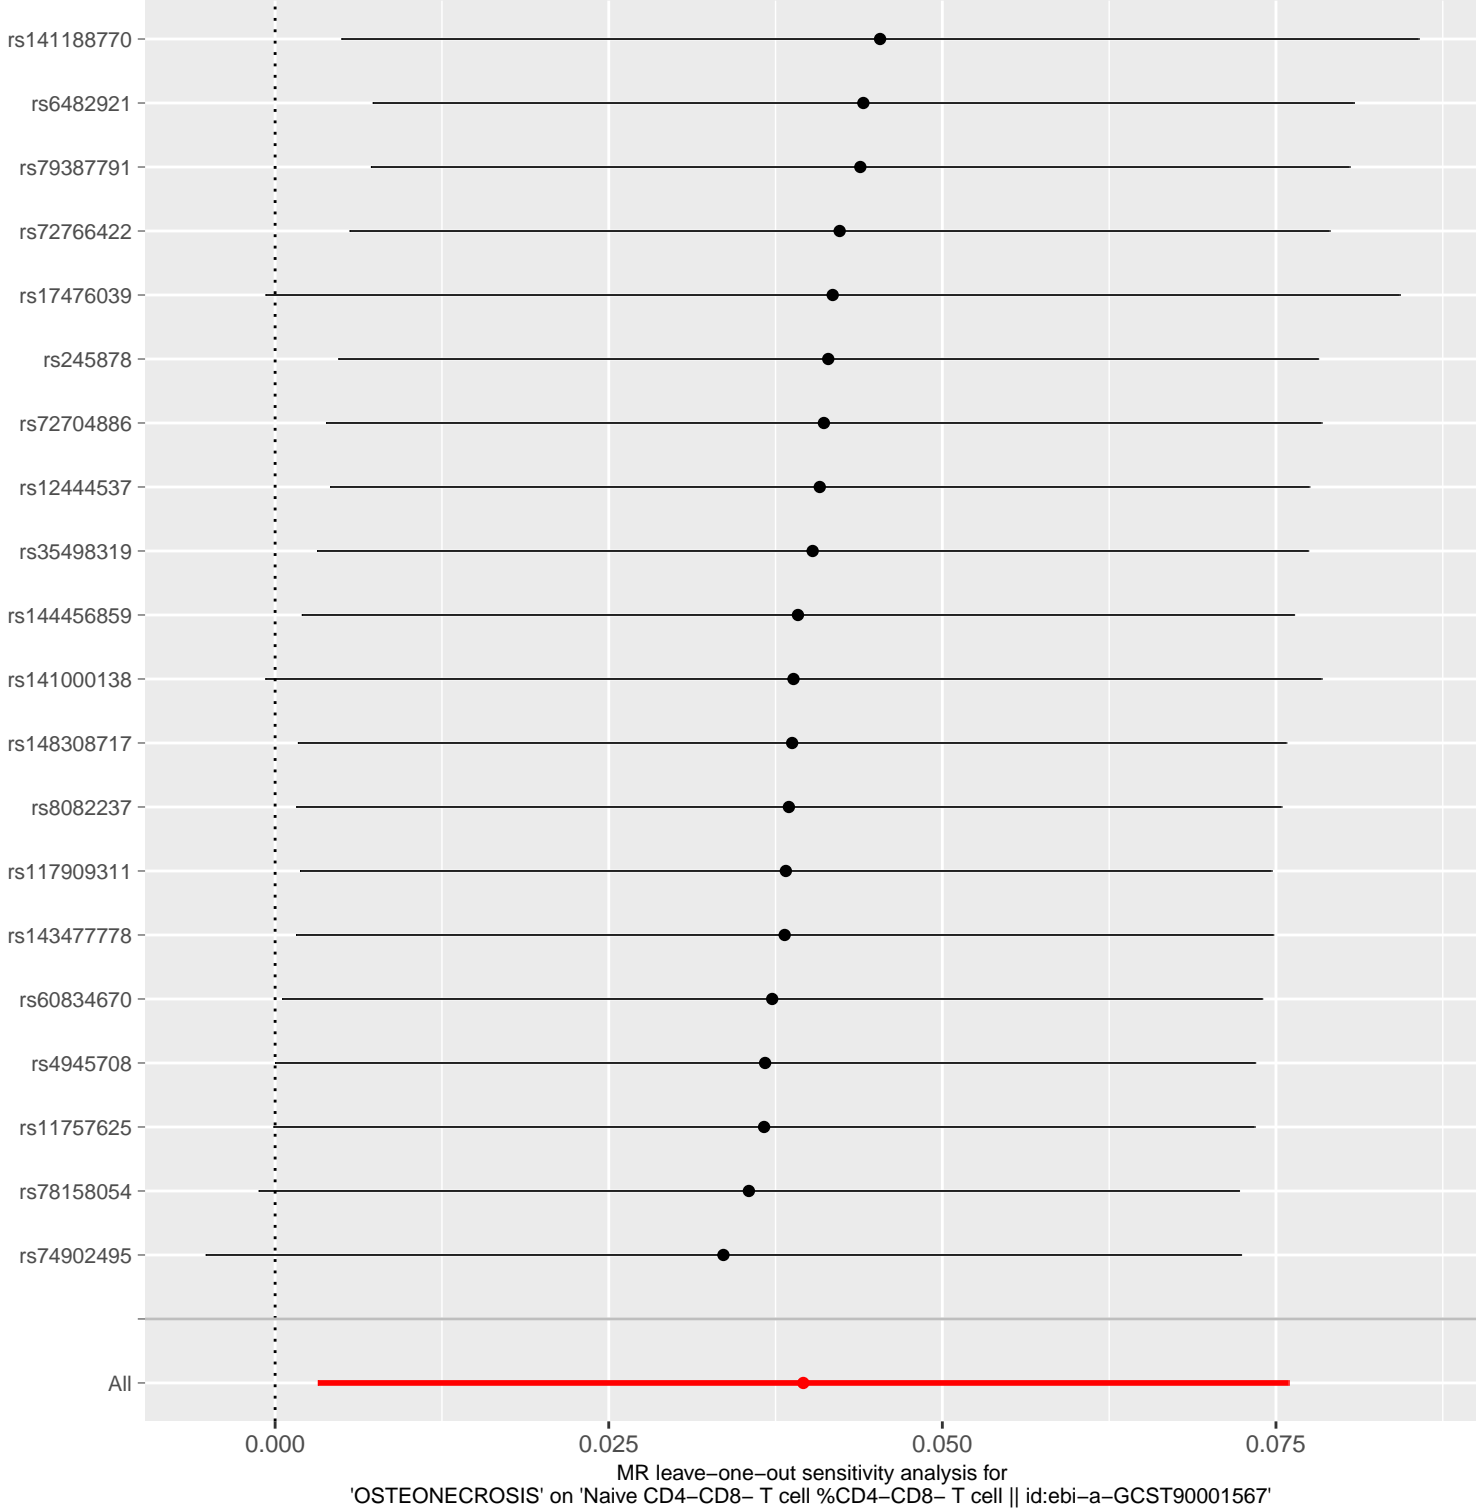



### MR Test

- Inverse variance weighted
- MR Egger
- Simple mode
- Weighted median
- Weighted mode

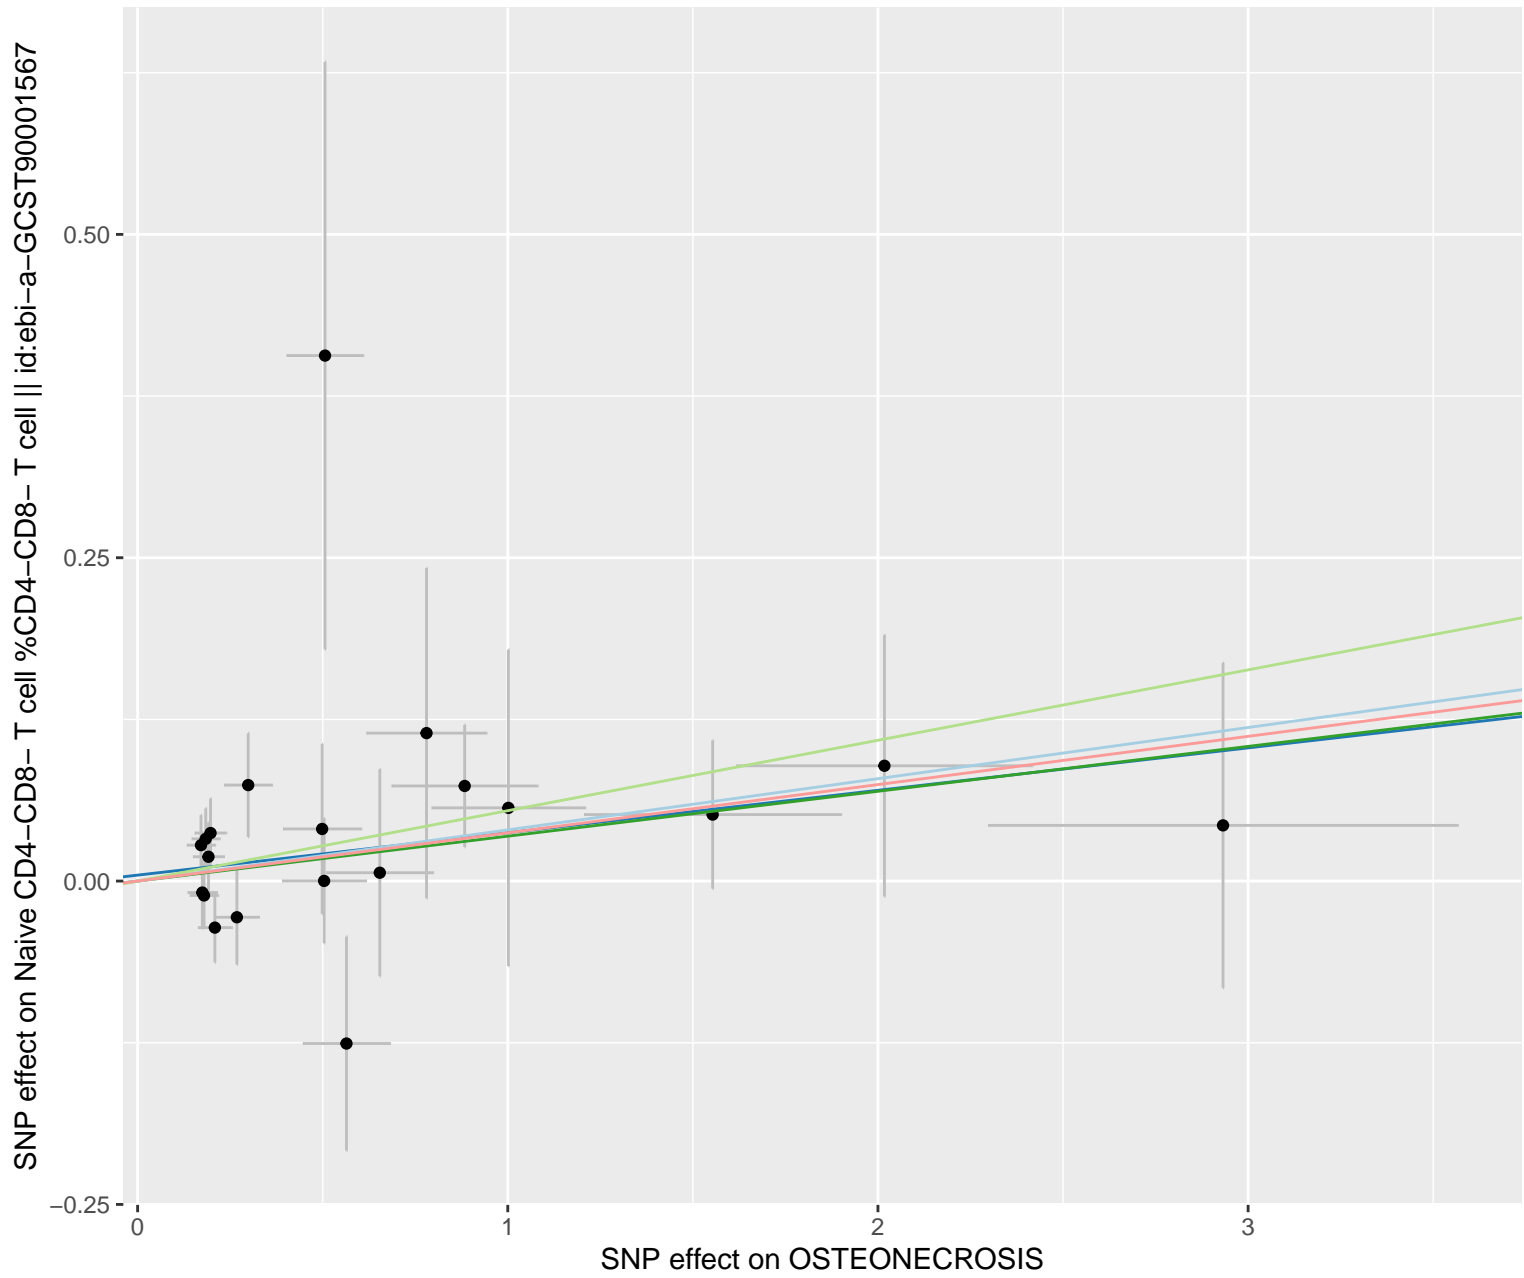

MR Method

- Inverse variance weighted
- MR Egger

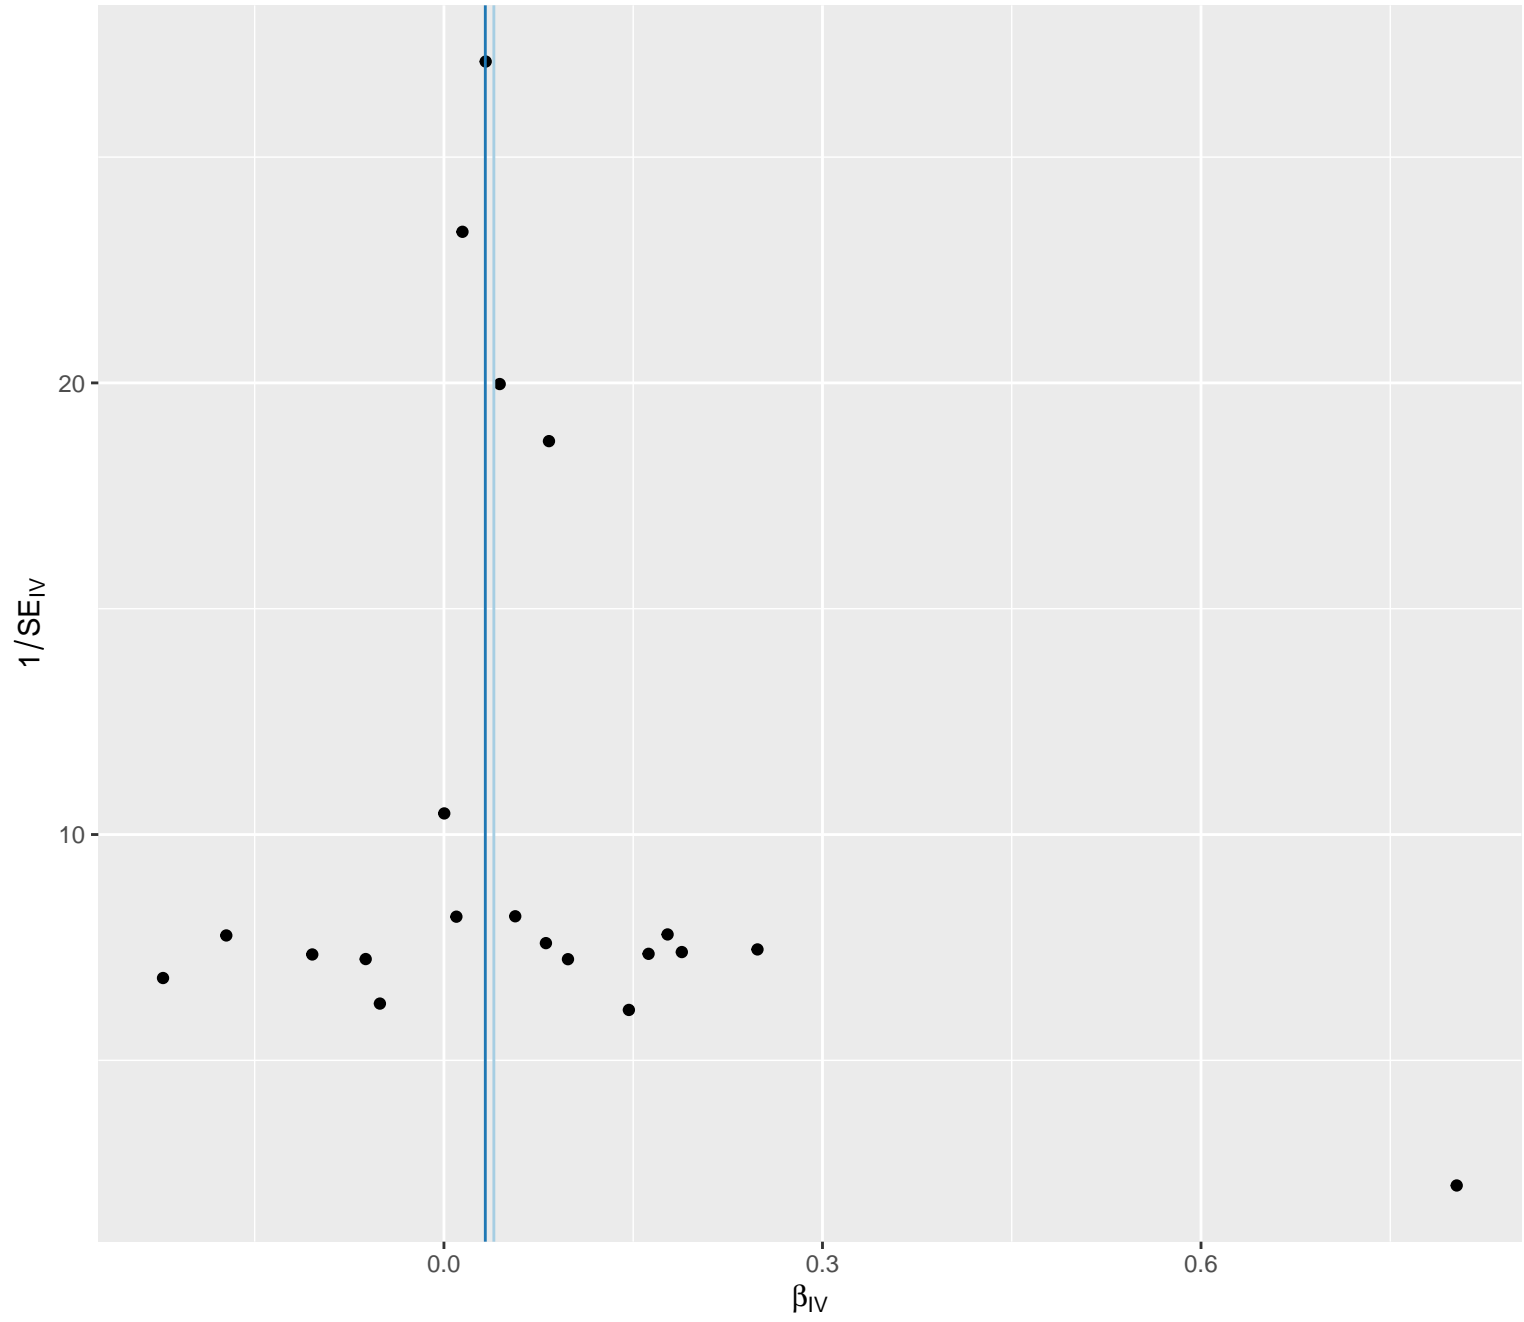

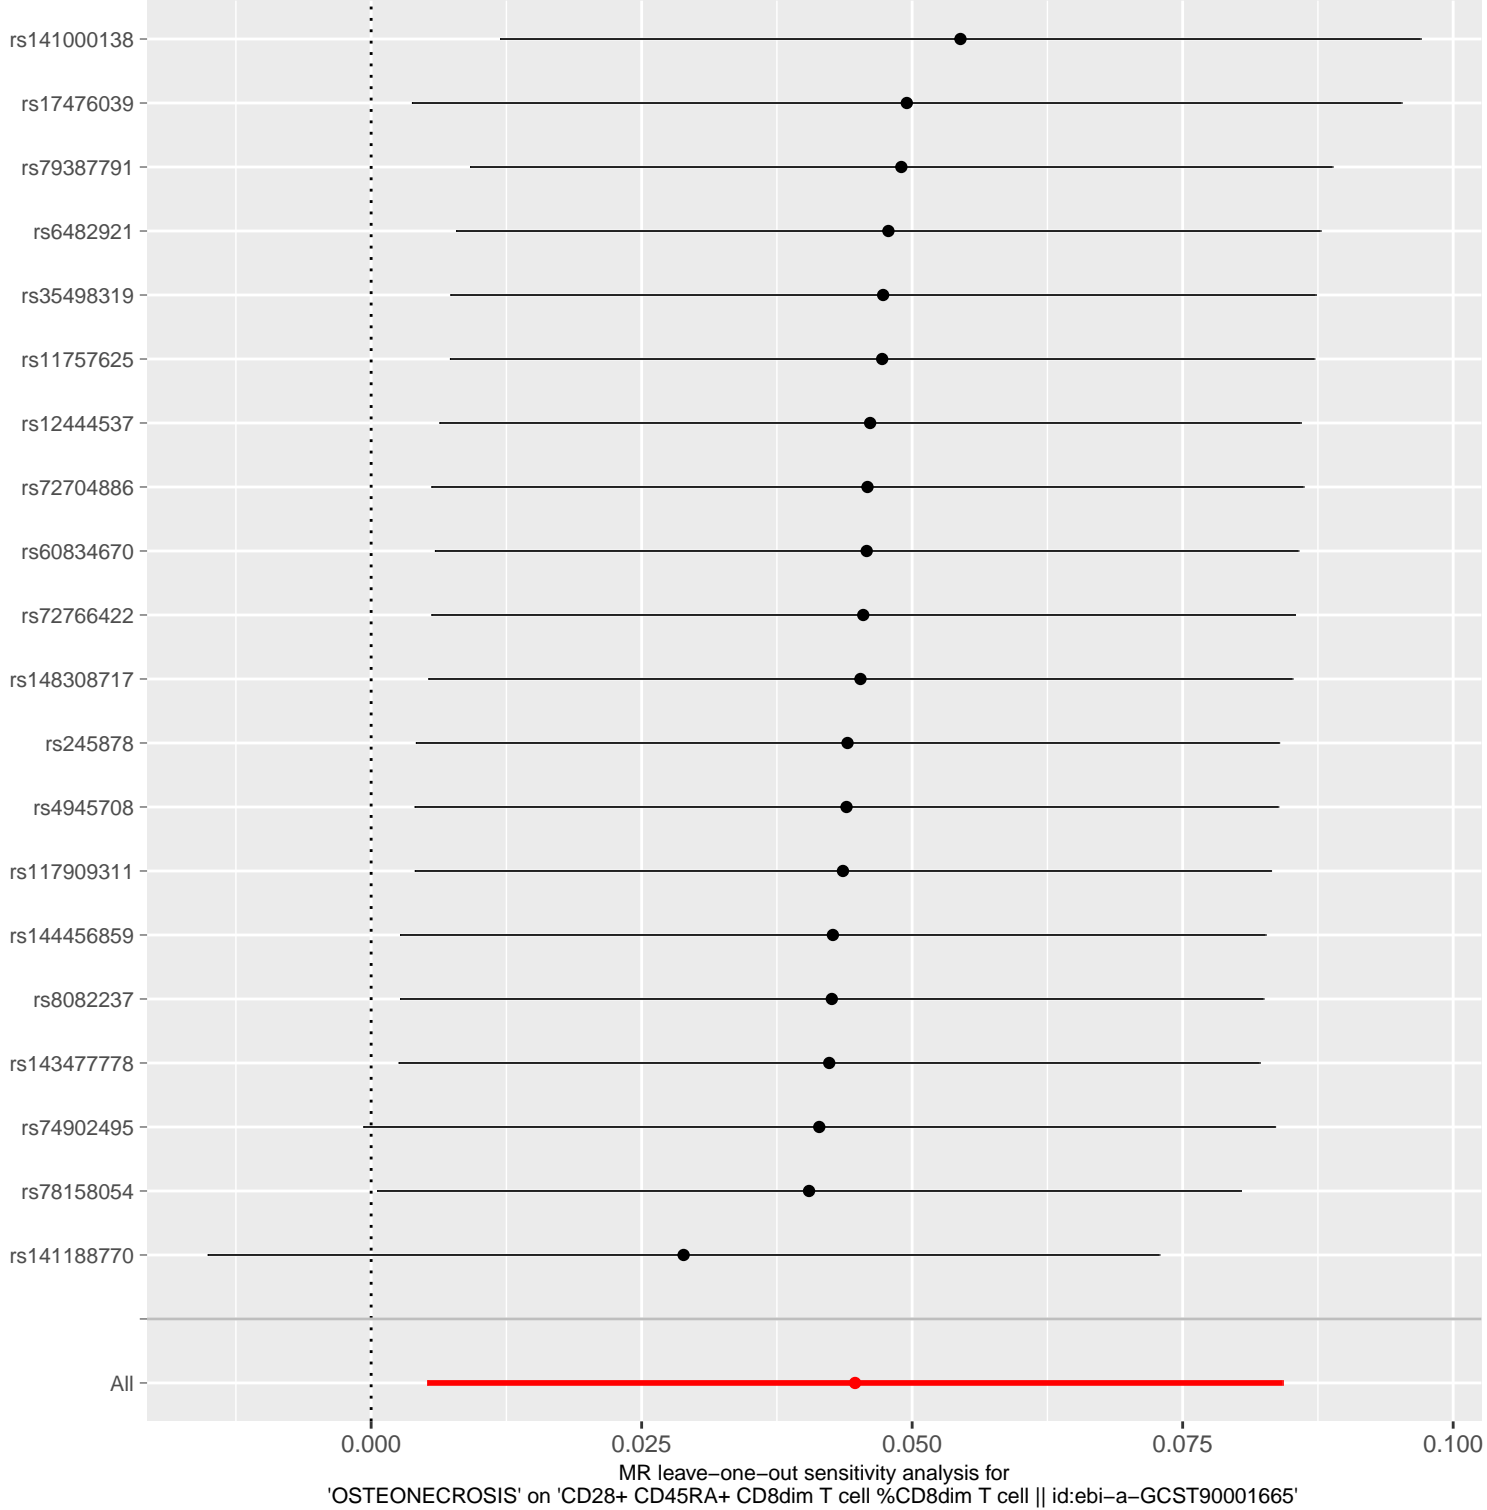

### MR Test

- Inverse variance weighted
- MR Egger
- Simple mode
- Weighted median
- Weighted mode

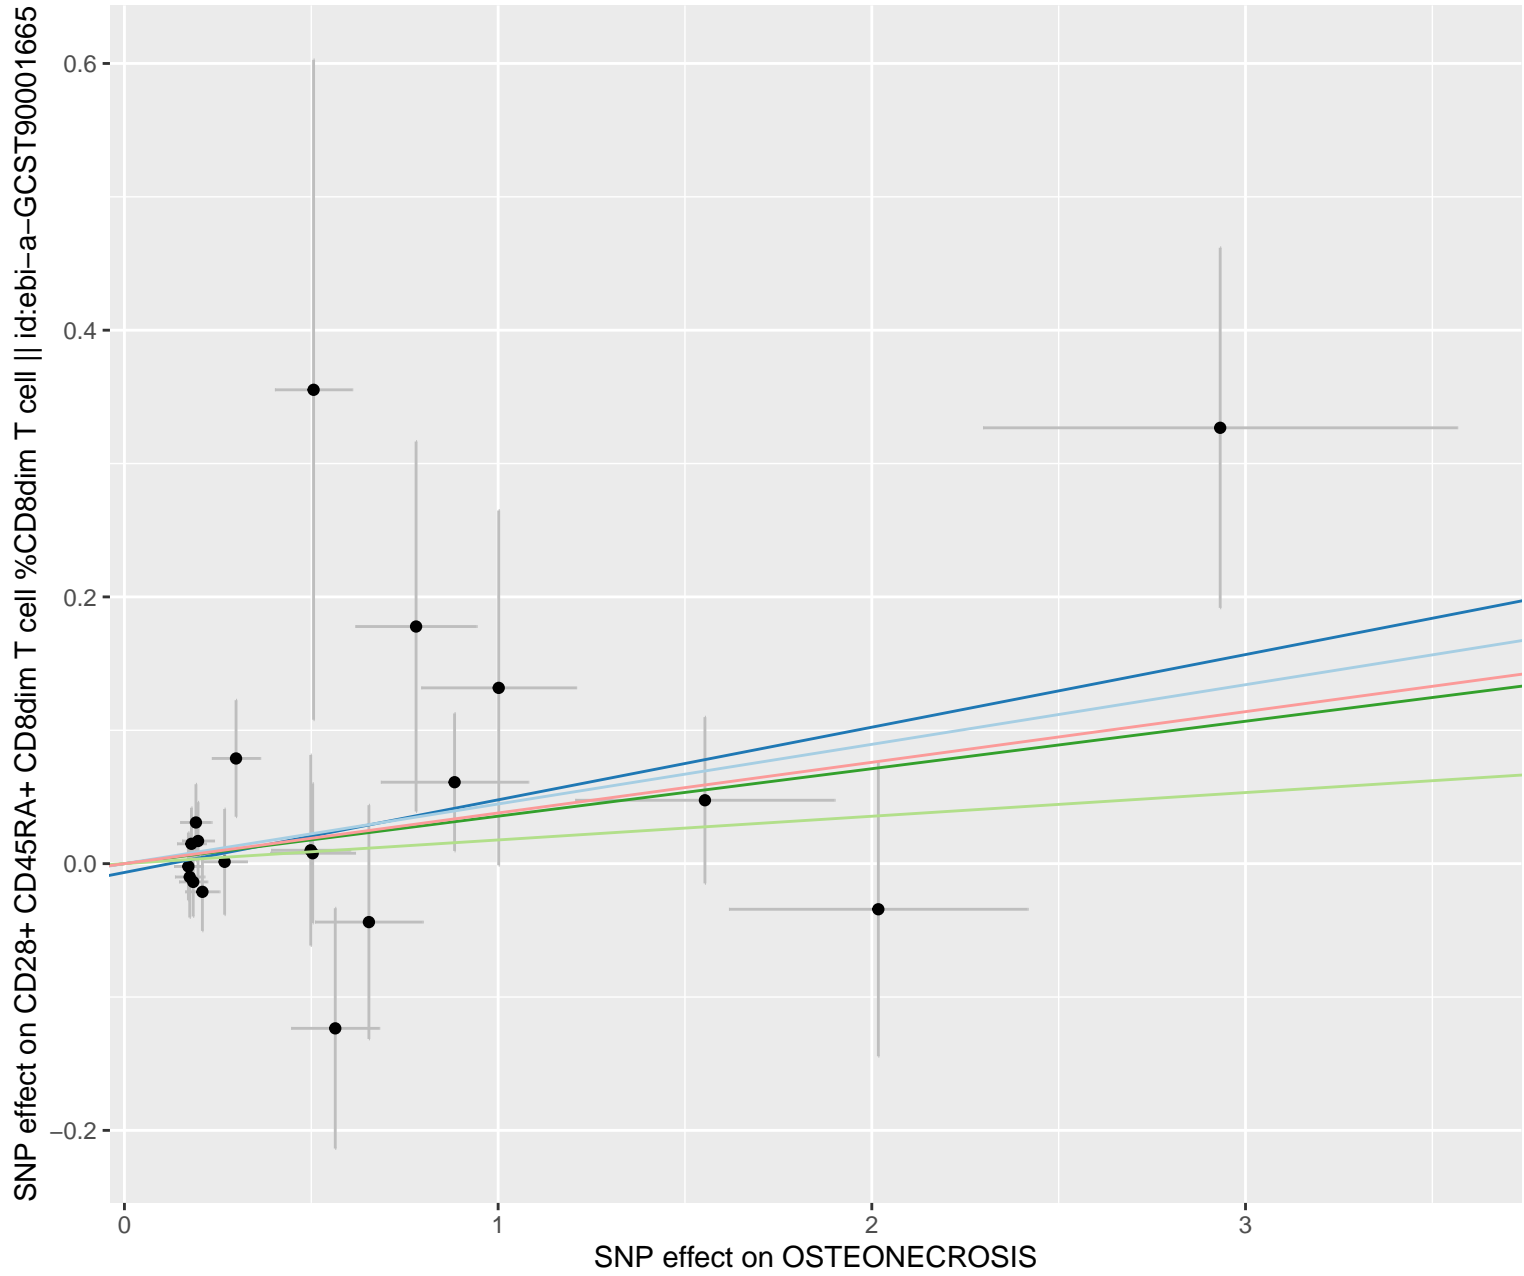

### MR Method

- Inverse variance weighted
- MR Egger

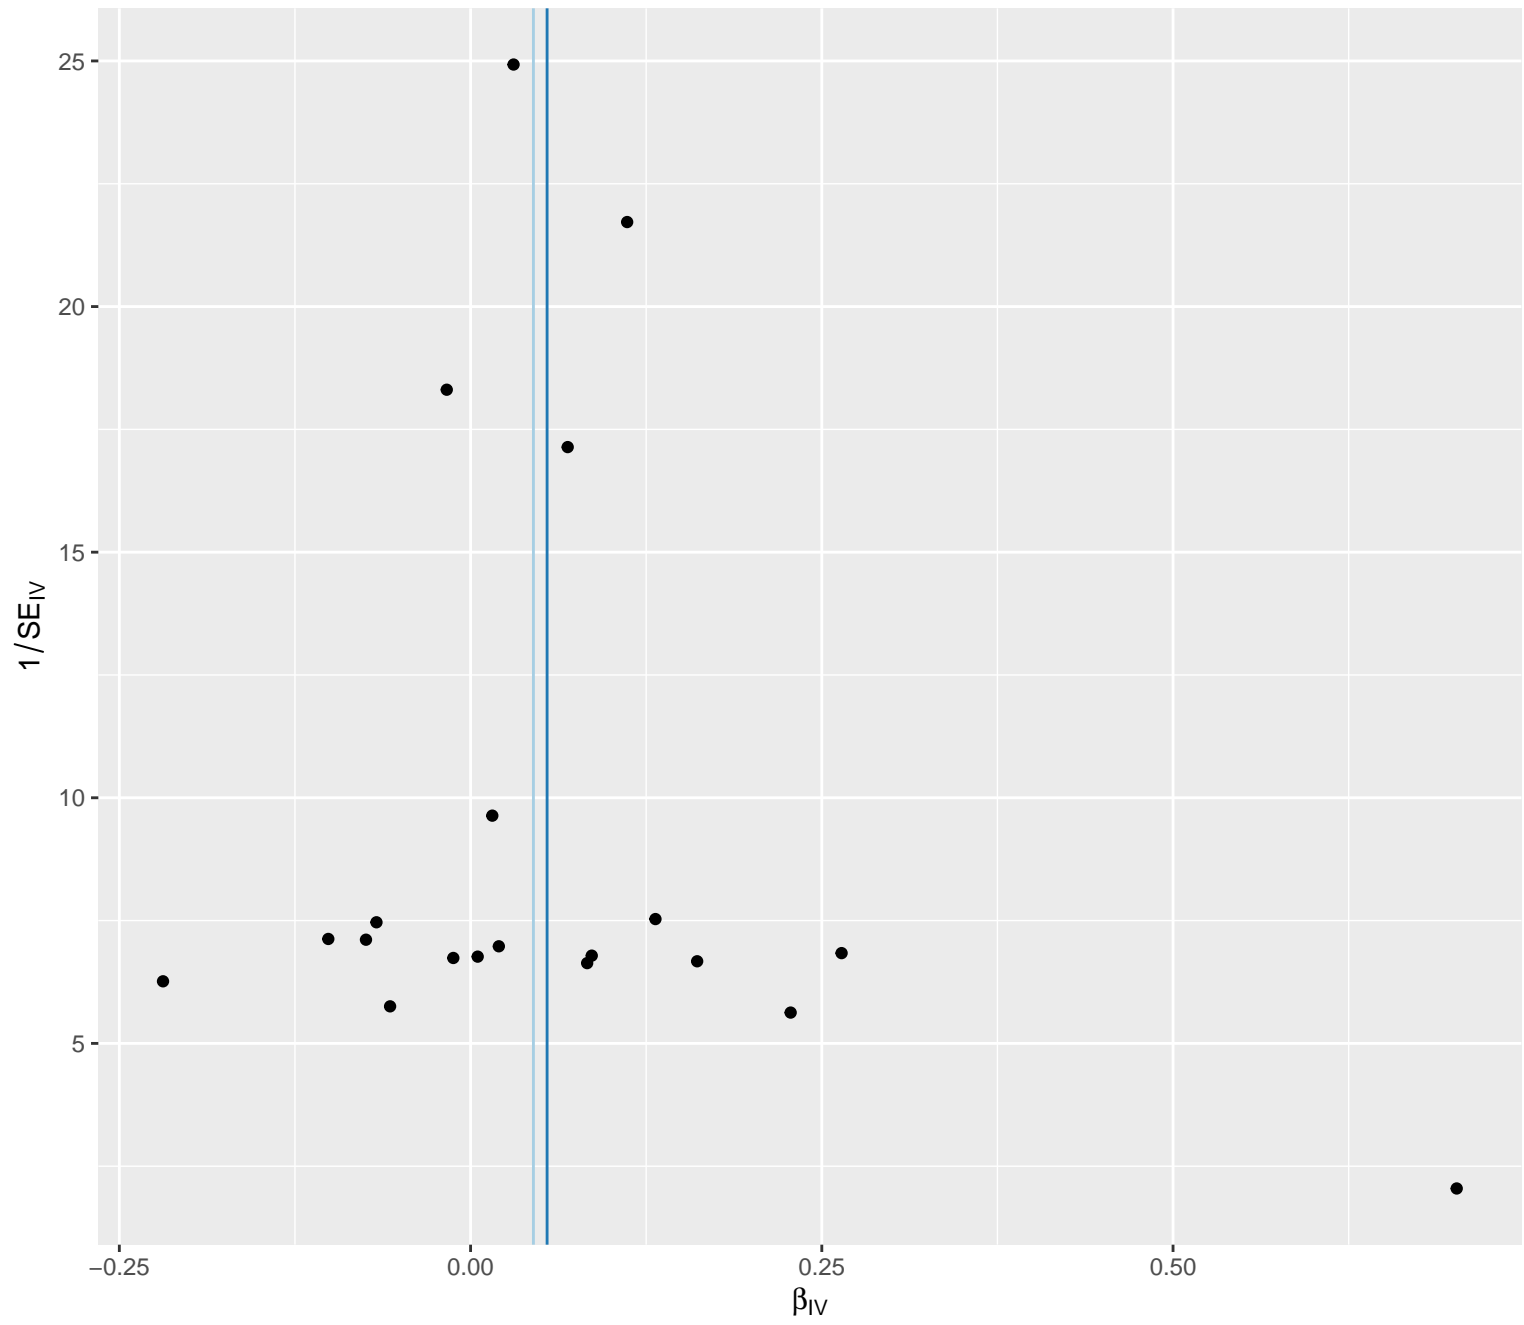

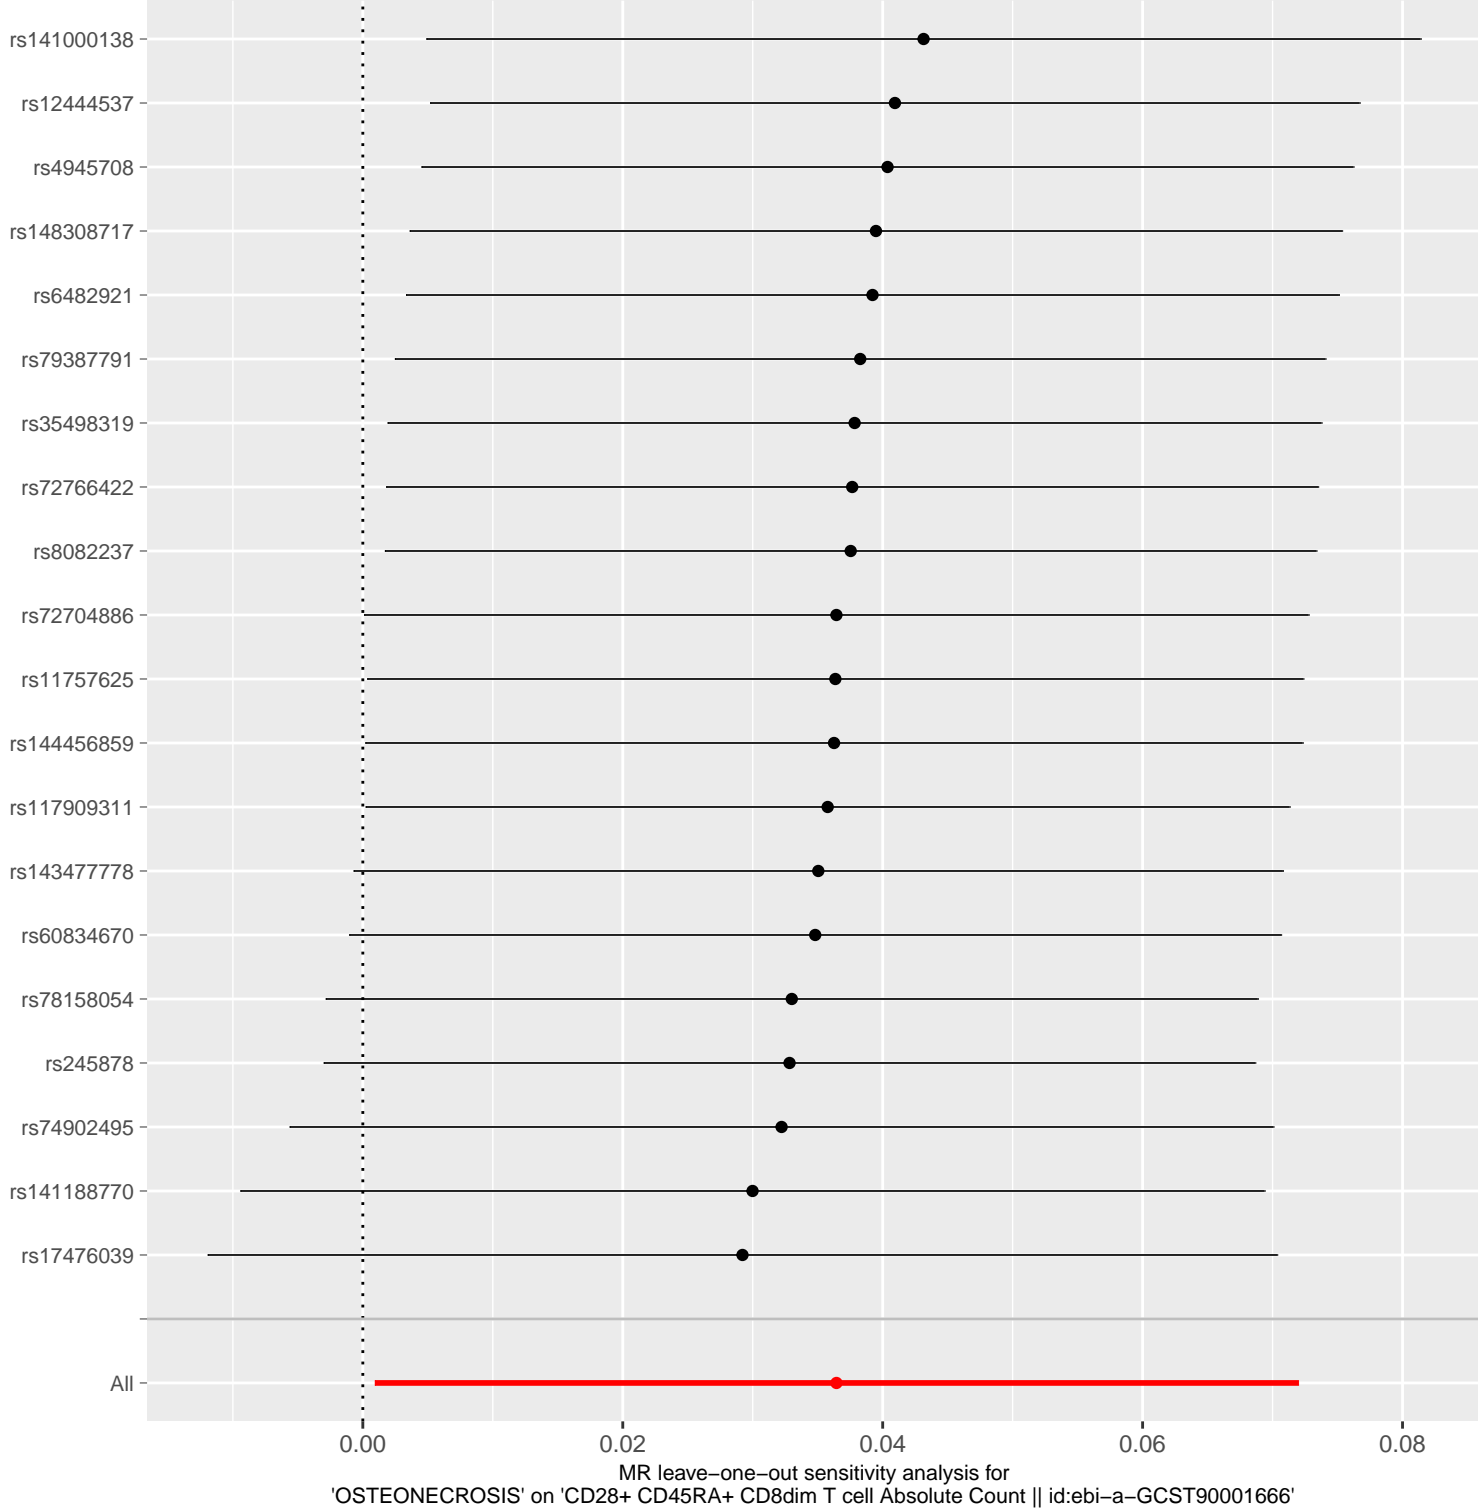

### MR Test

- Inverse variance weighted
- MR Egger
- Simple mode
- Weighted median
- Weighted mode

SNP effect on CD28+ CD45RA+ CD8dim T cell Absolute Count || id:ebi-a-GCST90001666

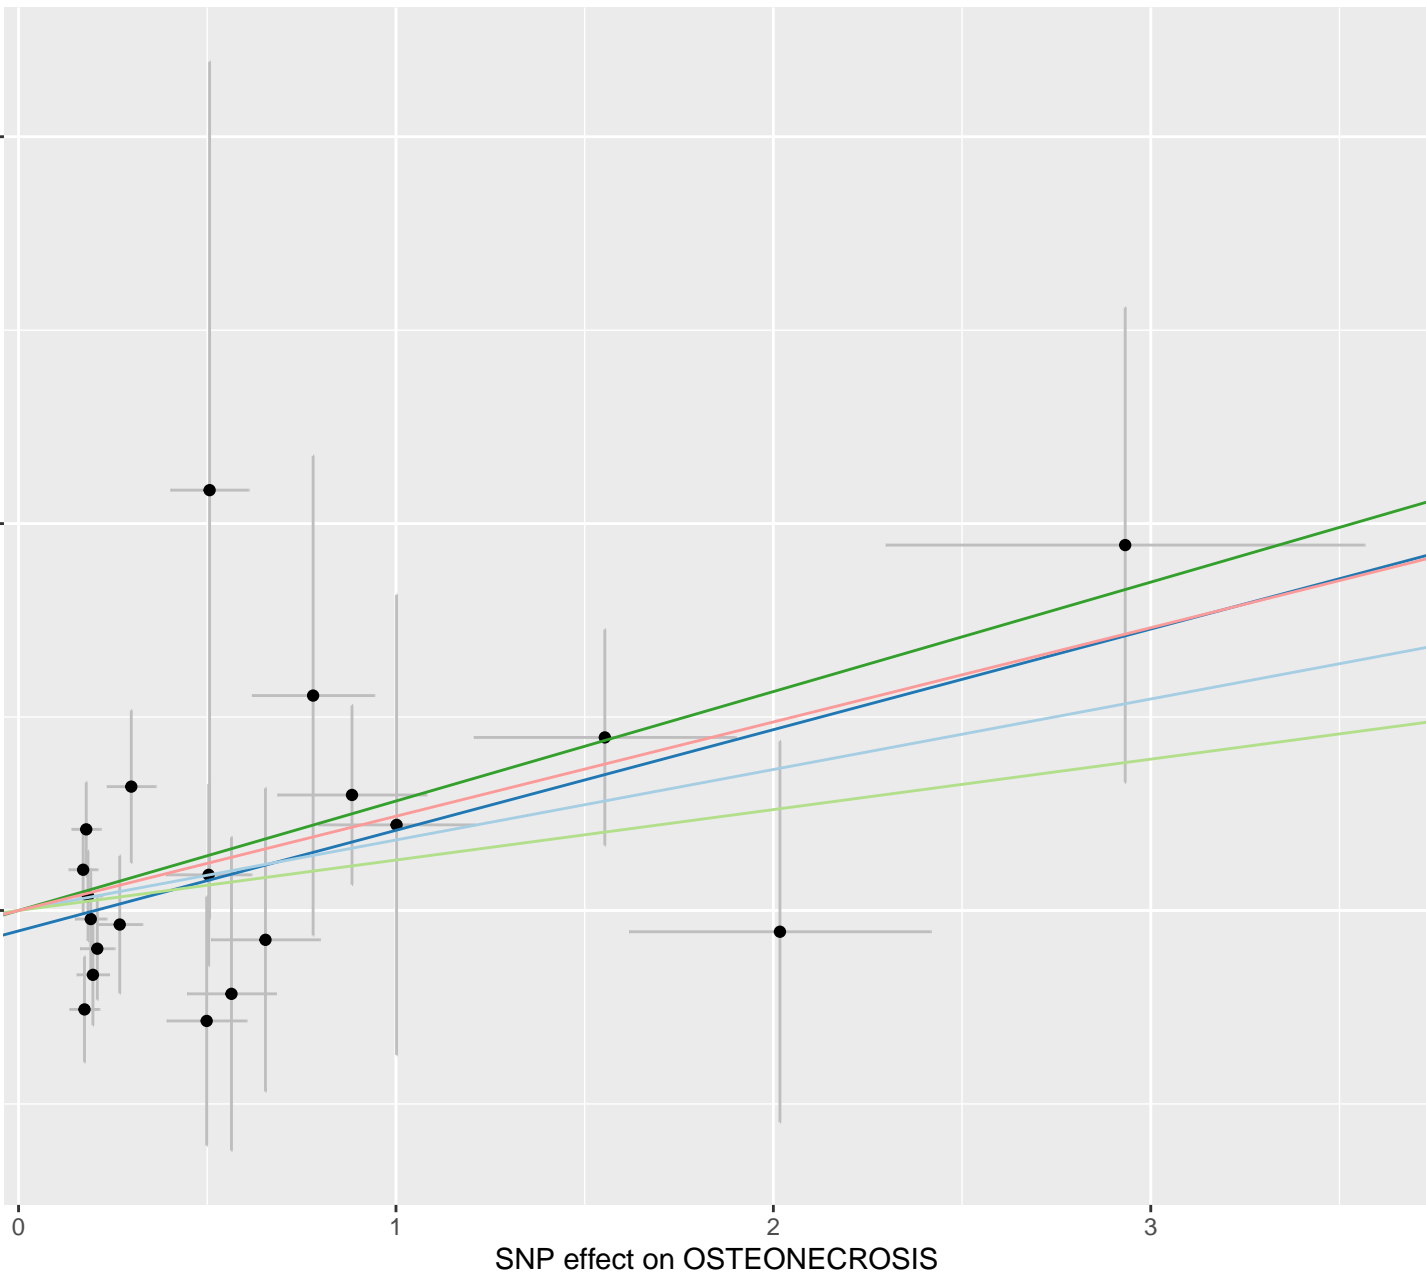

MR Method

- Inverse variance weighted
- MR Egger

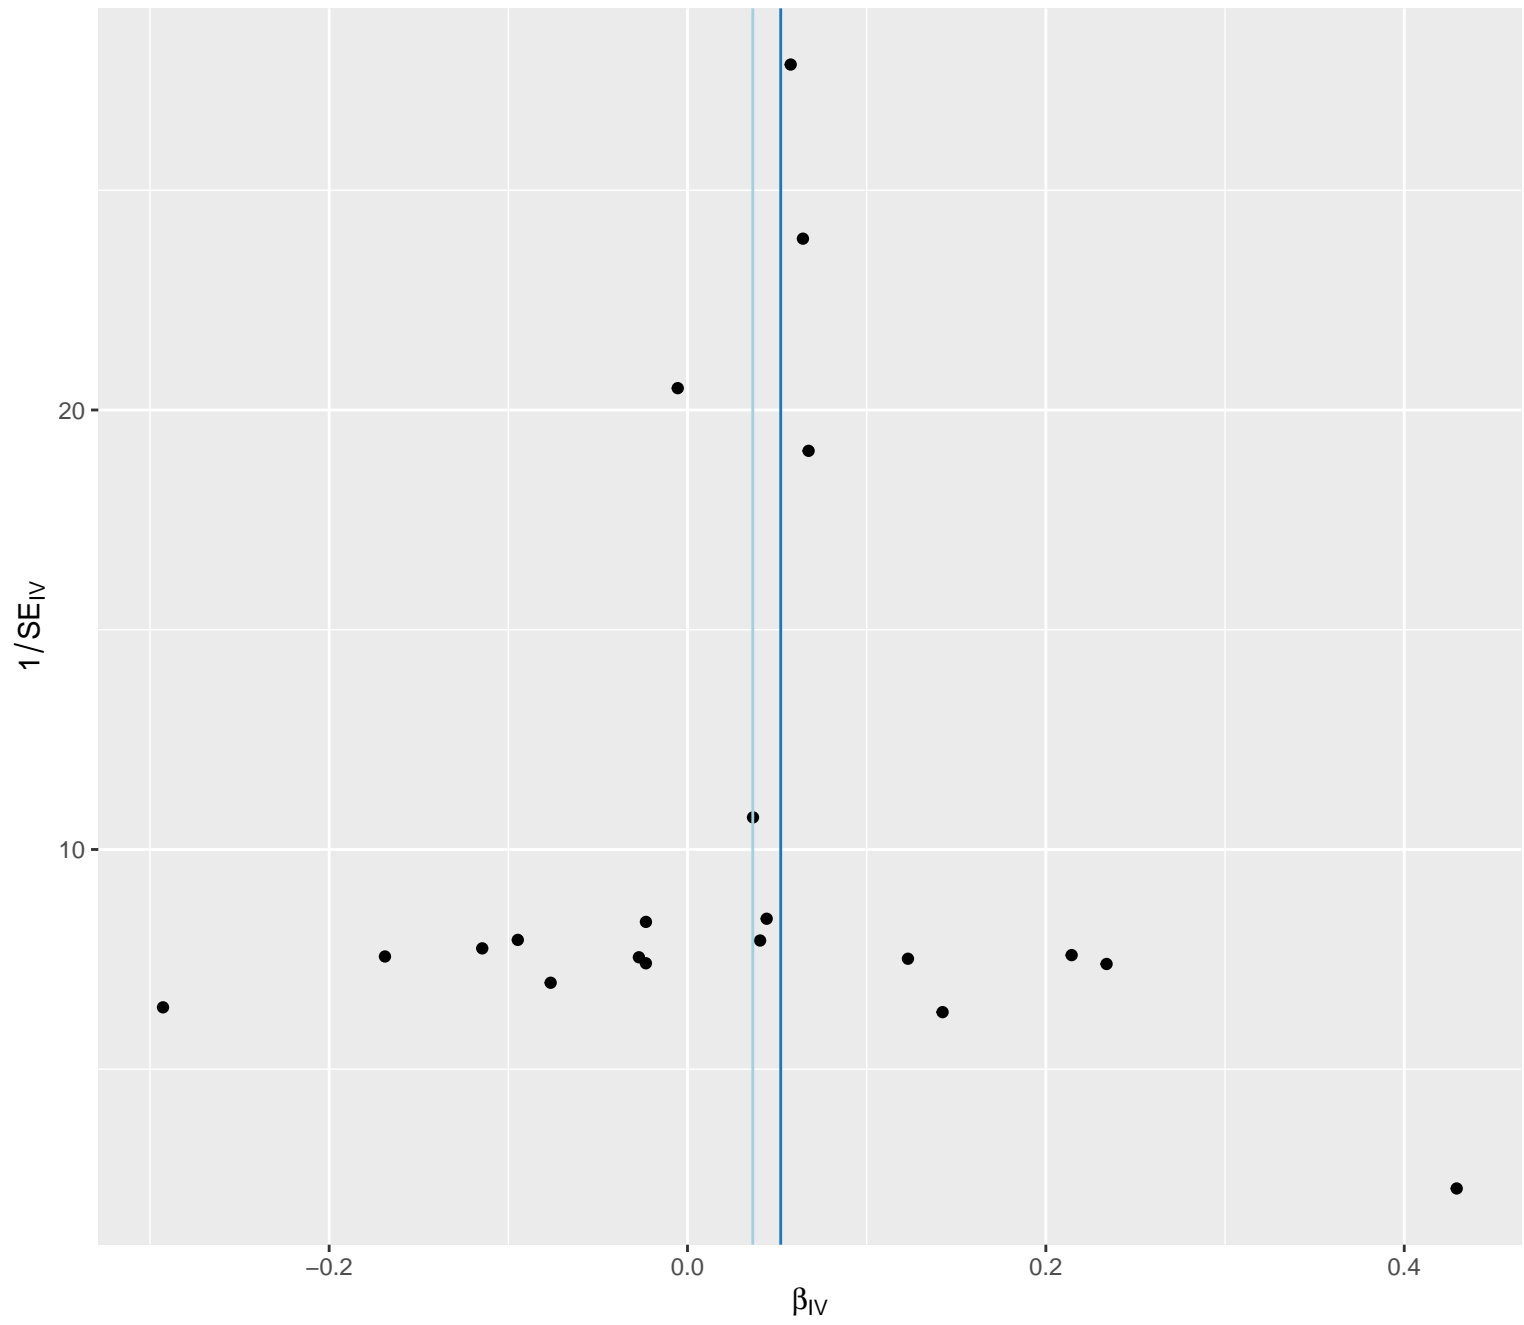



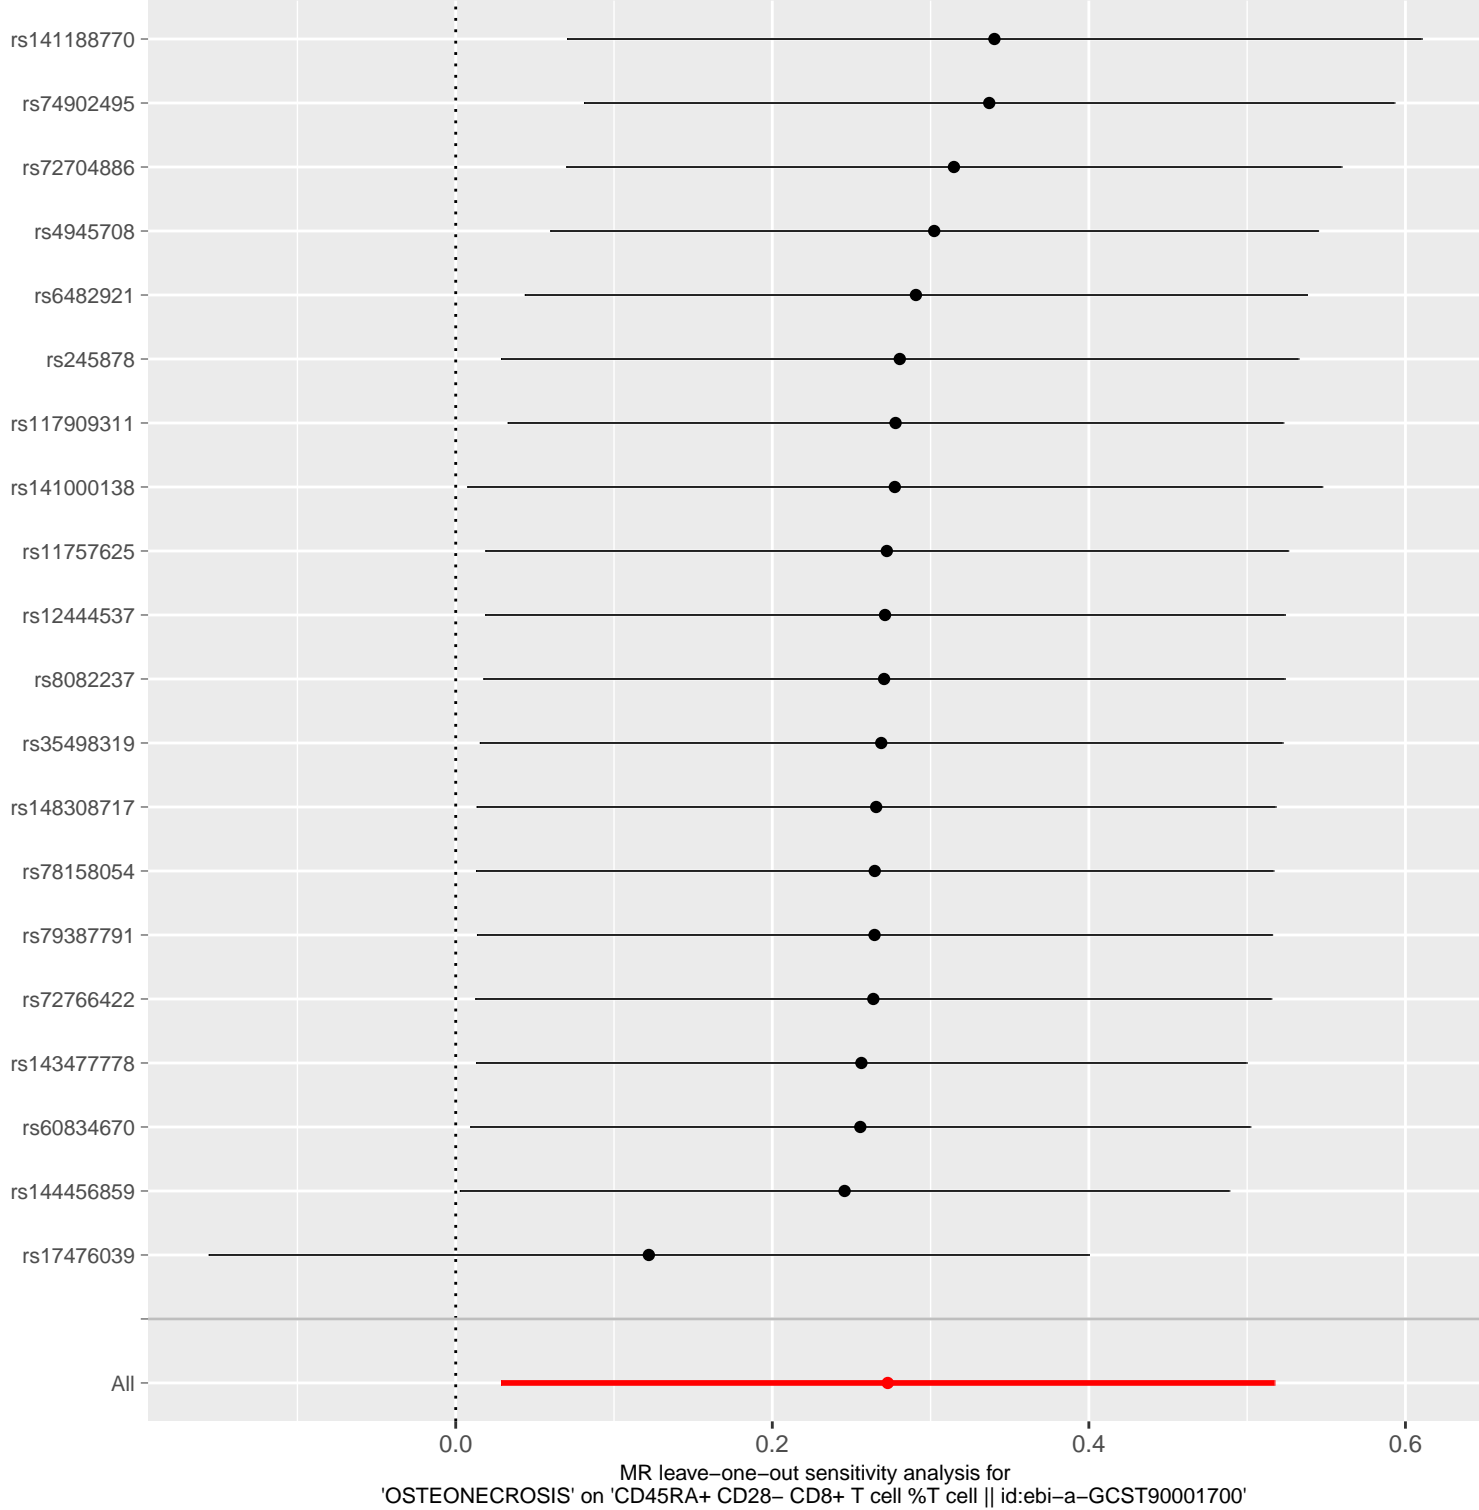

MR Test

- Inverse variance weighted
- MR Egger
- Simple mode
- Weighted median
- Weighted mode

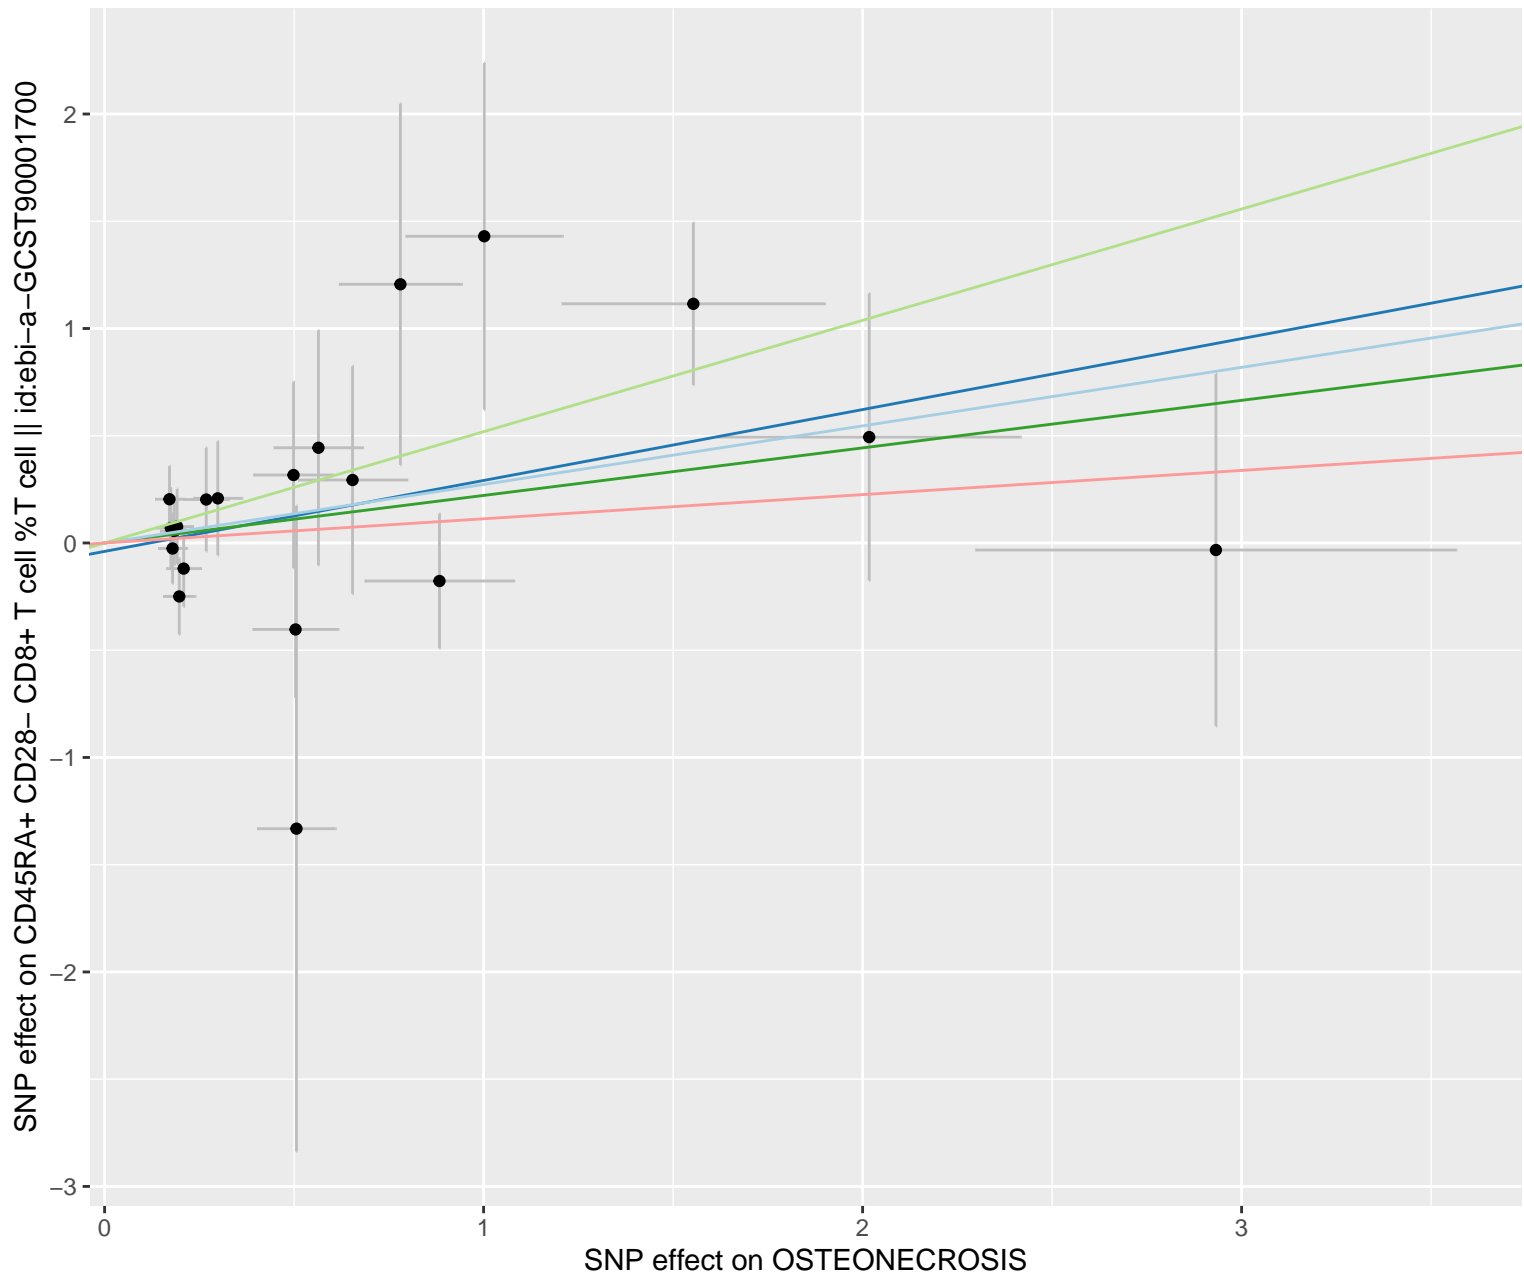

### MR Method

- Inverse variance weighted
- MR Egger

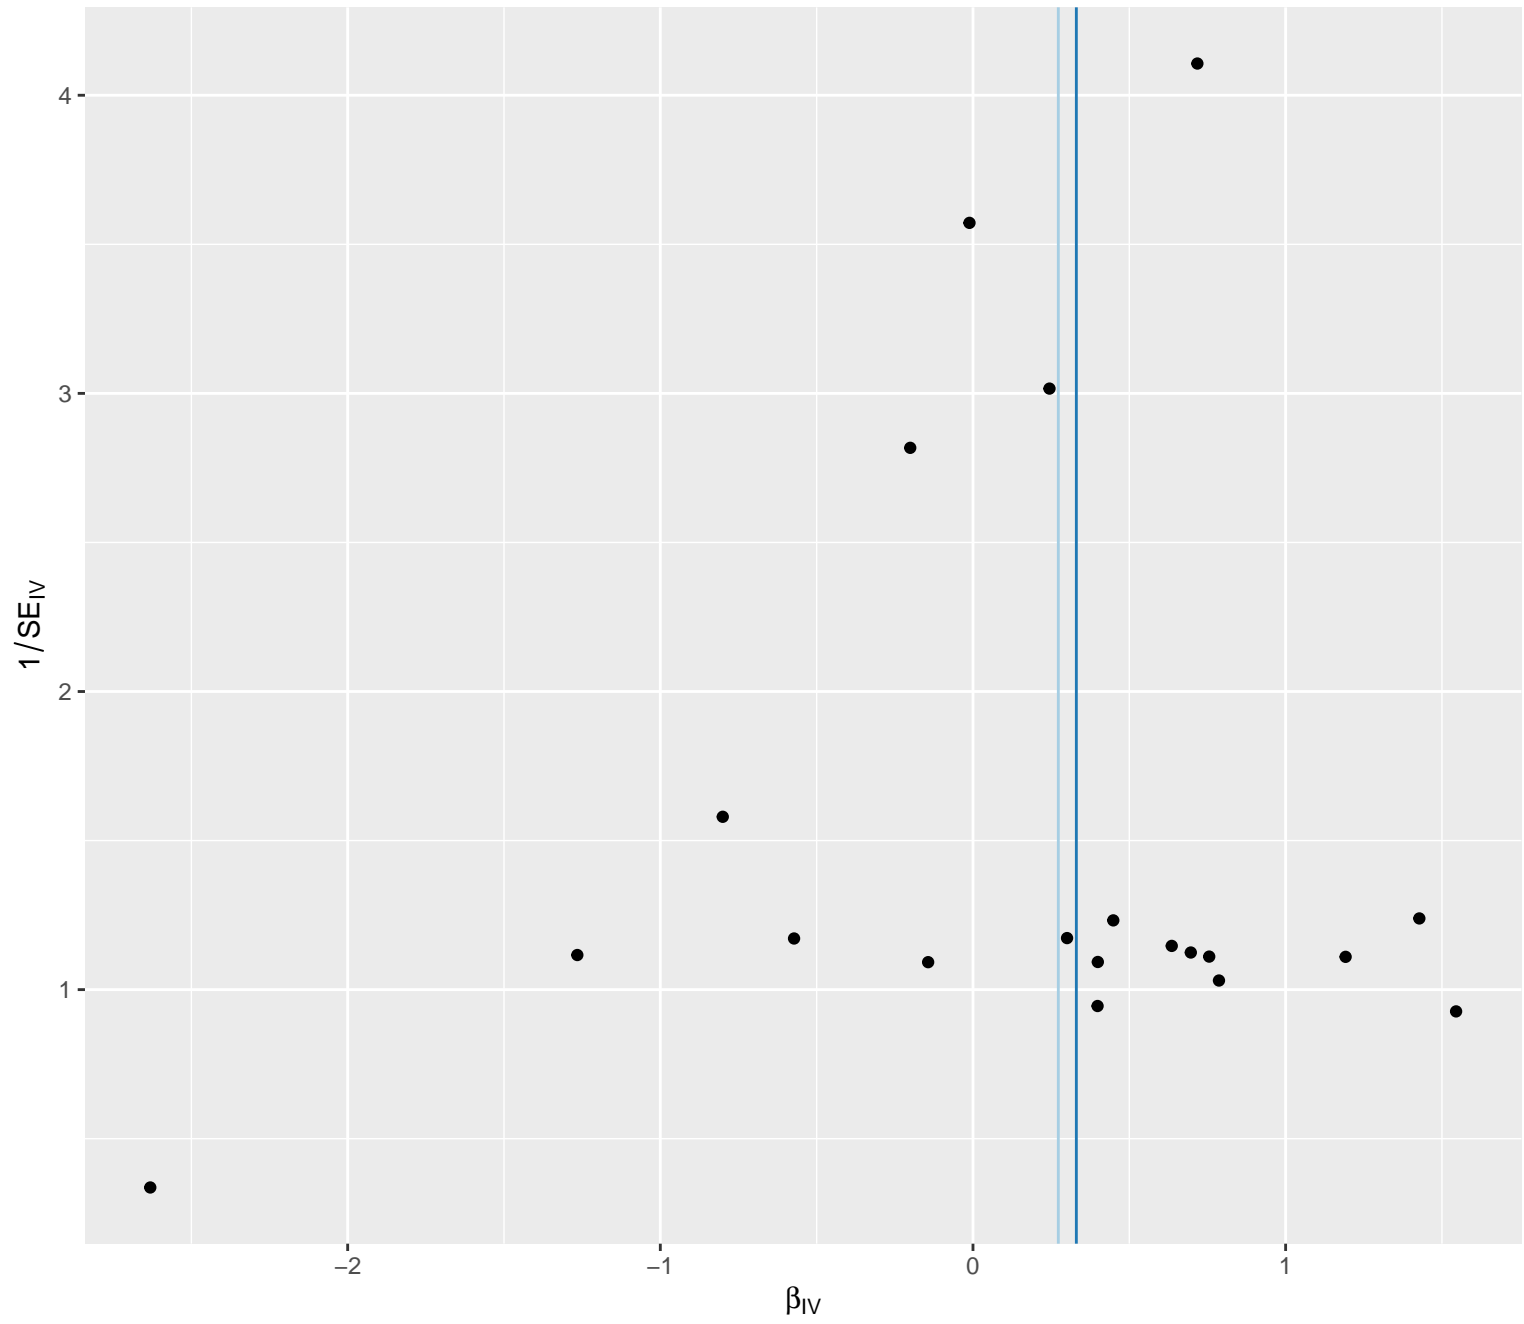

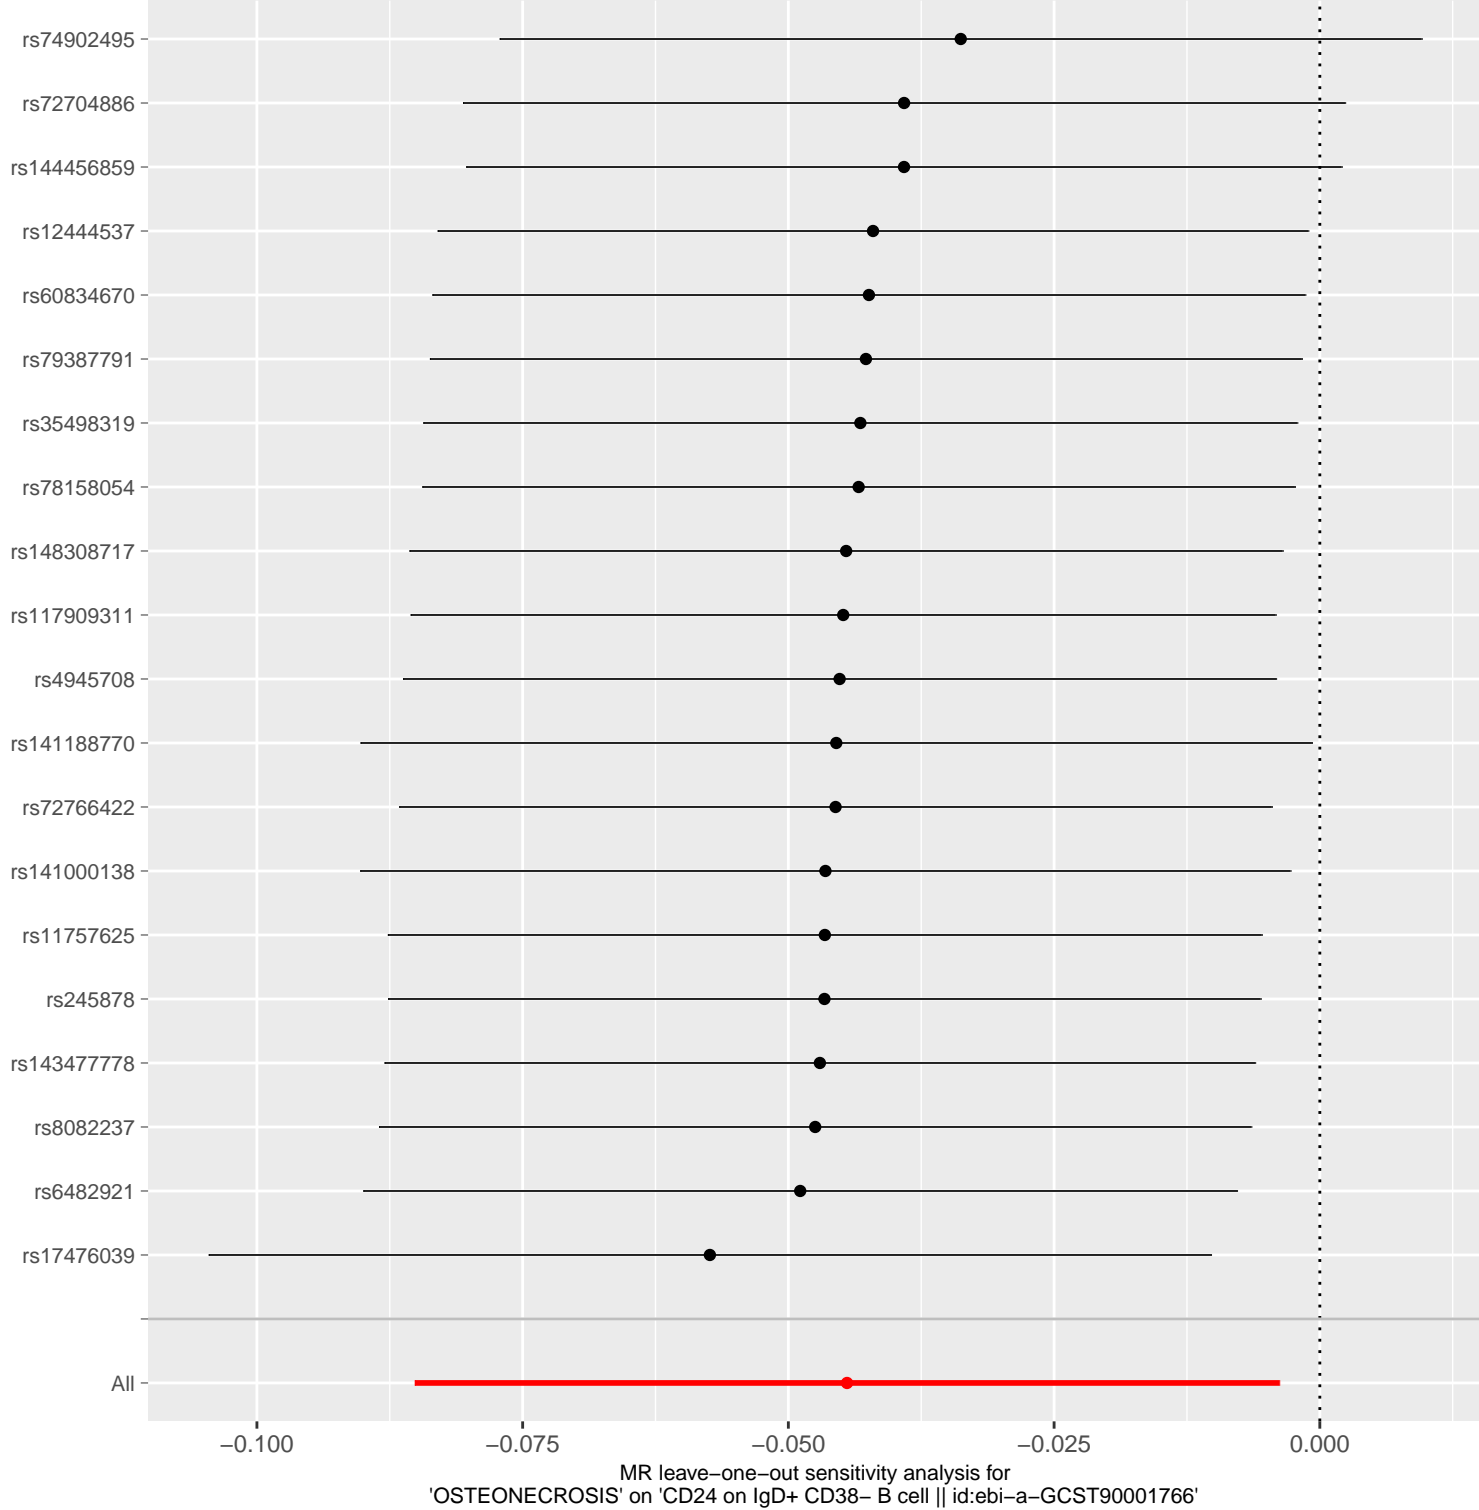

MR Test

- Inverse variance weighted
- MR Egger
- Simple mode
- Weighted median
- Weighted mode

SNP effect on CD24 on IgD+ CD38- B cell || id:ebi-a-GCST90001766

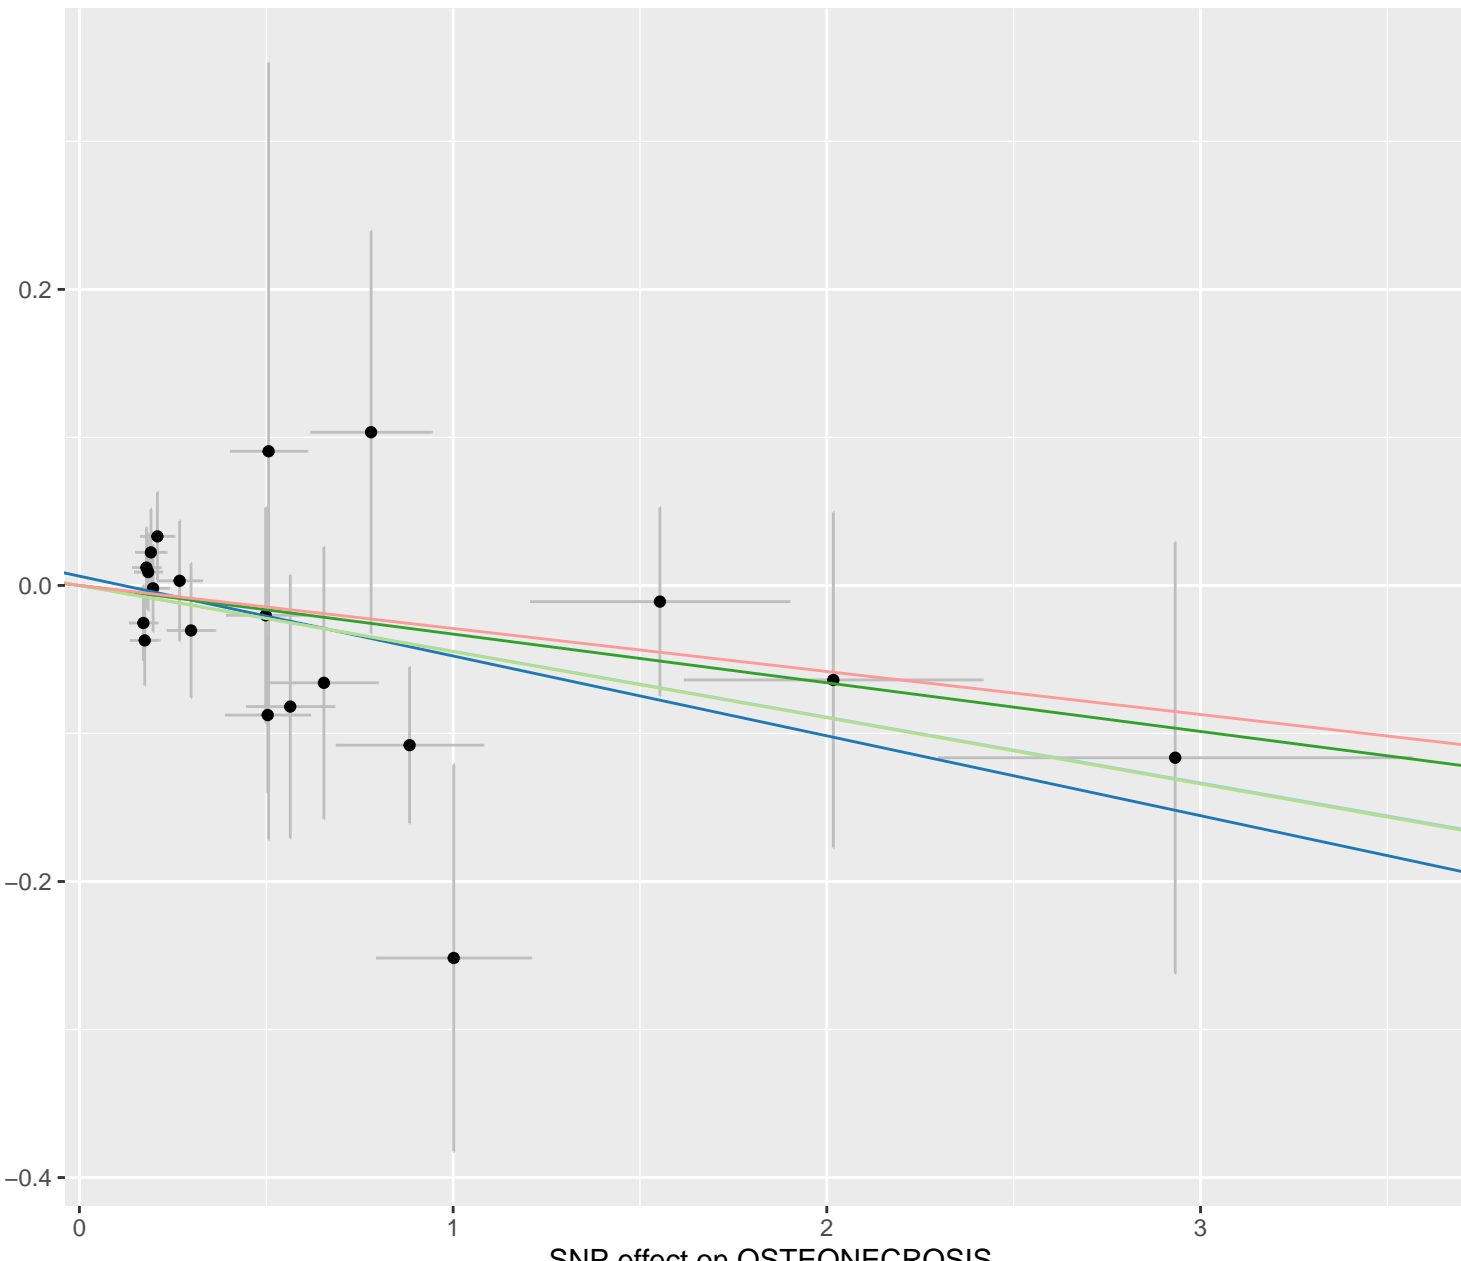

MR Method

- Inverse variance weighted
- MR Egger

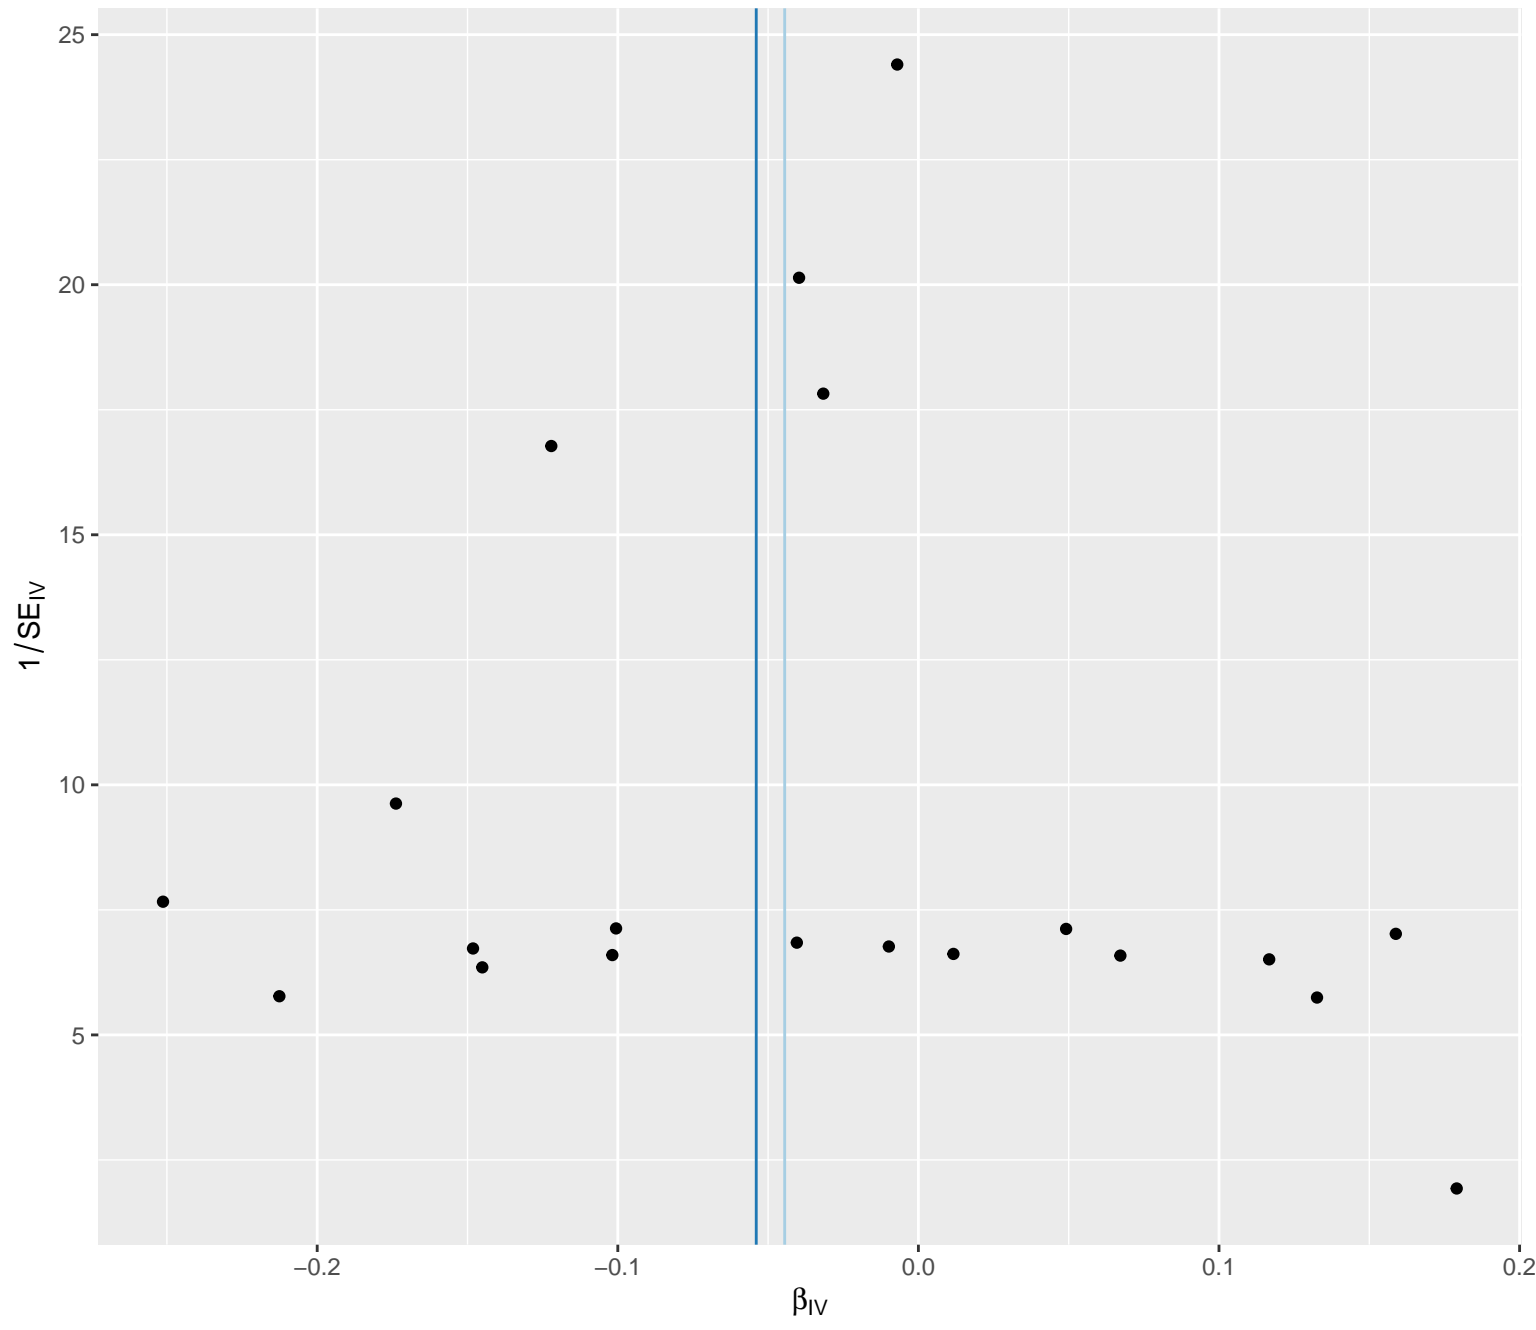

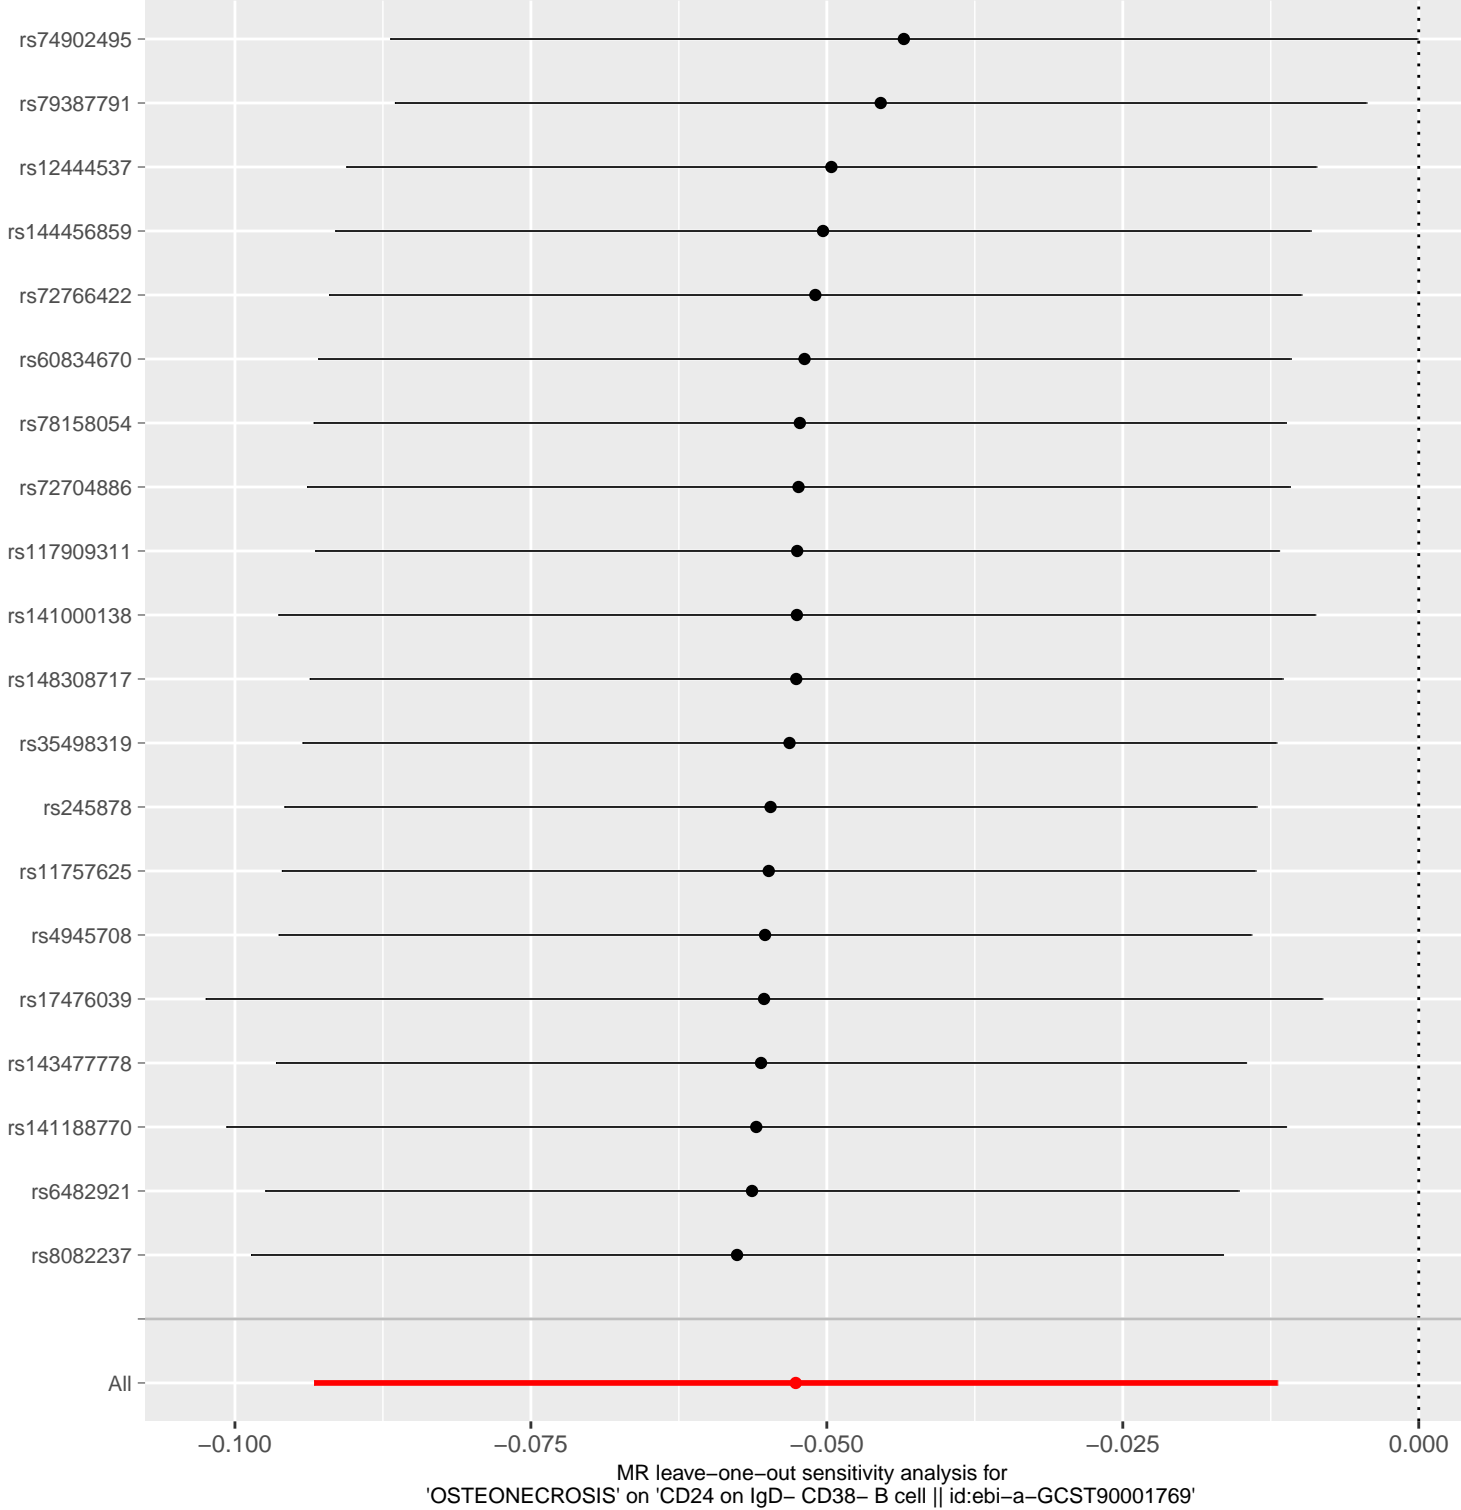

MR Test

- Inverse variance weighted
- MR Egger
- Simple mode
- Weighted median
- Weighted mode

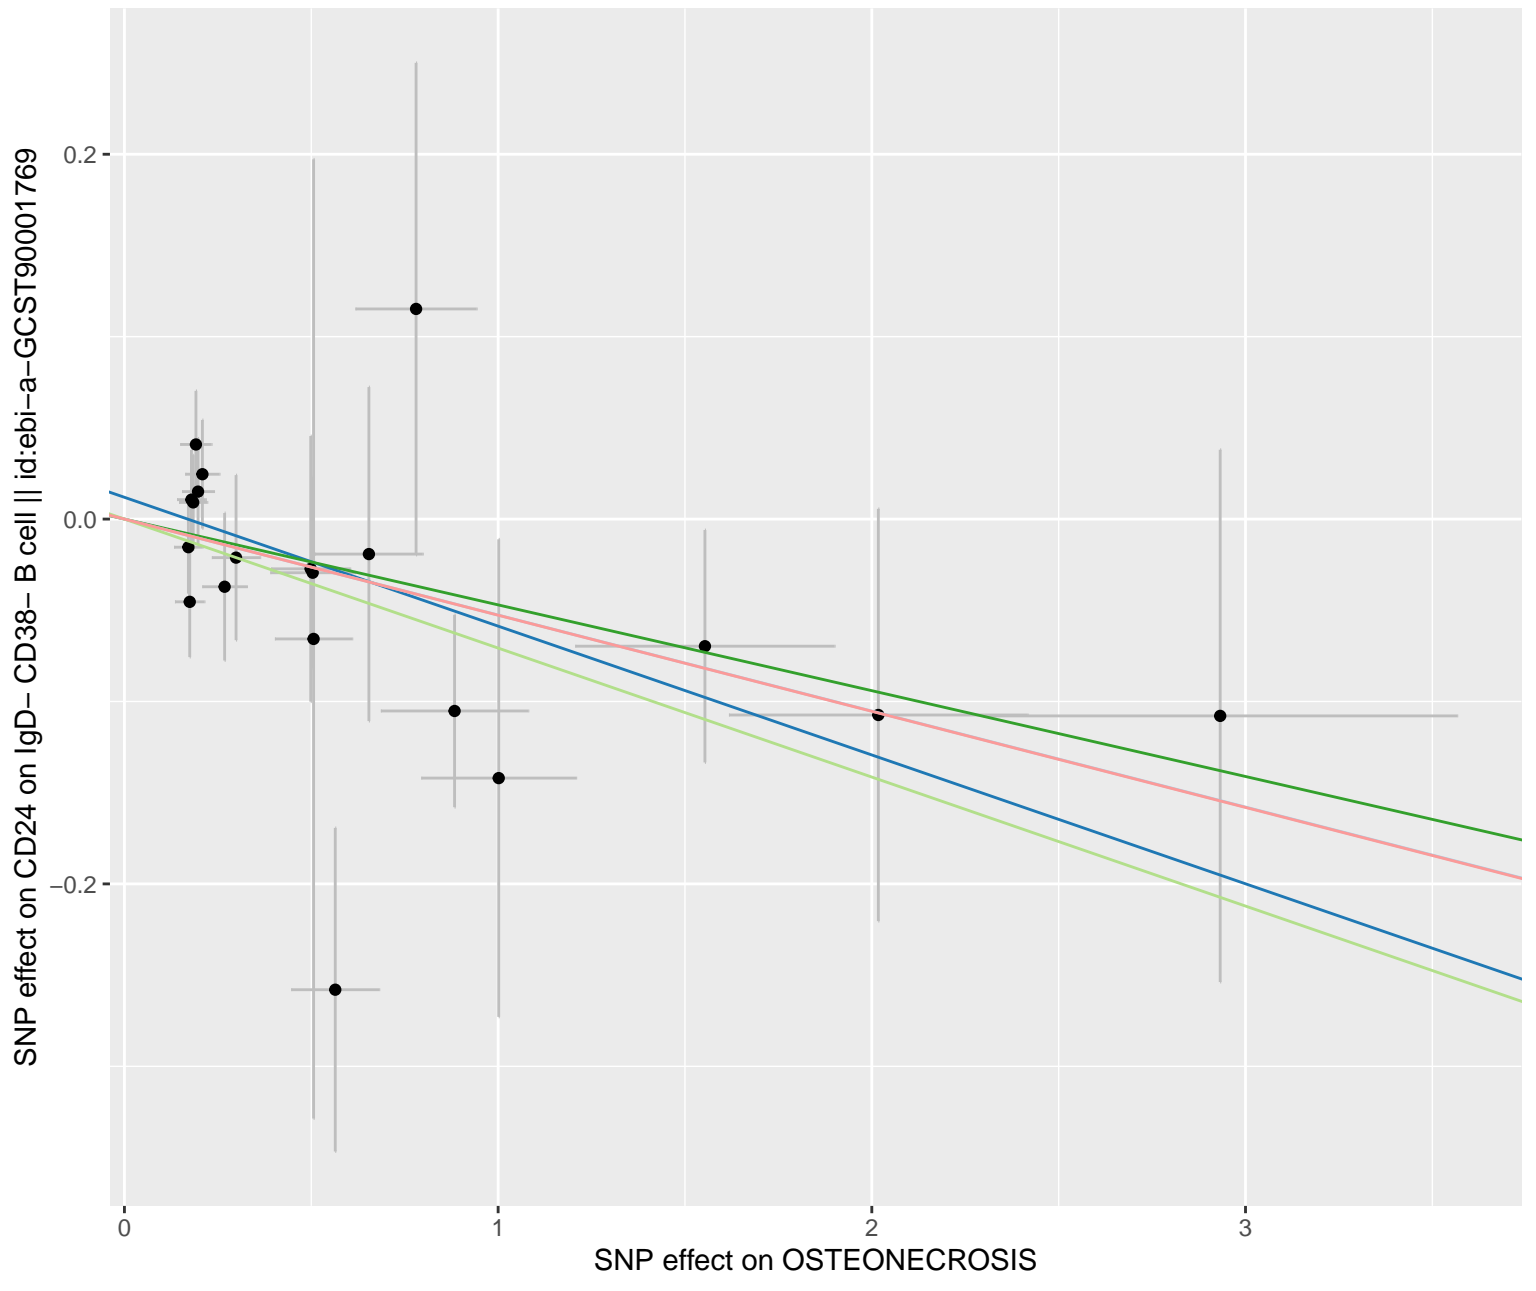



MR Method

- Inverse variance weighted
- MR Egger

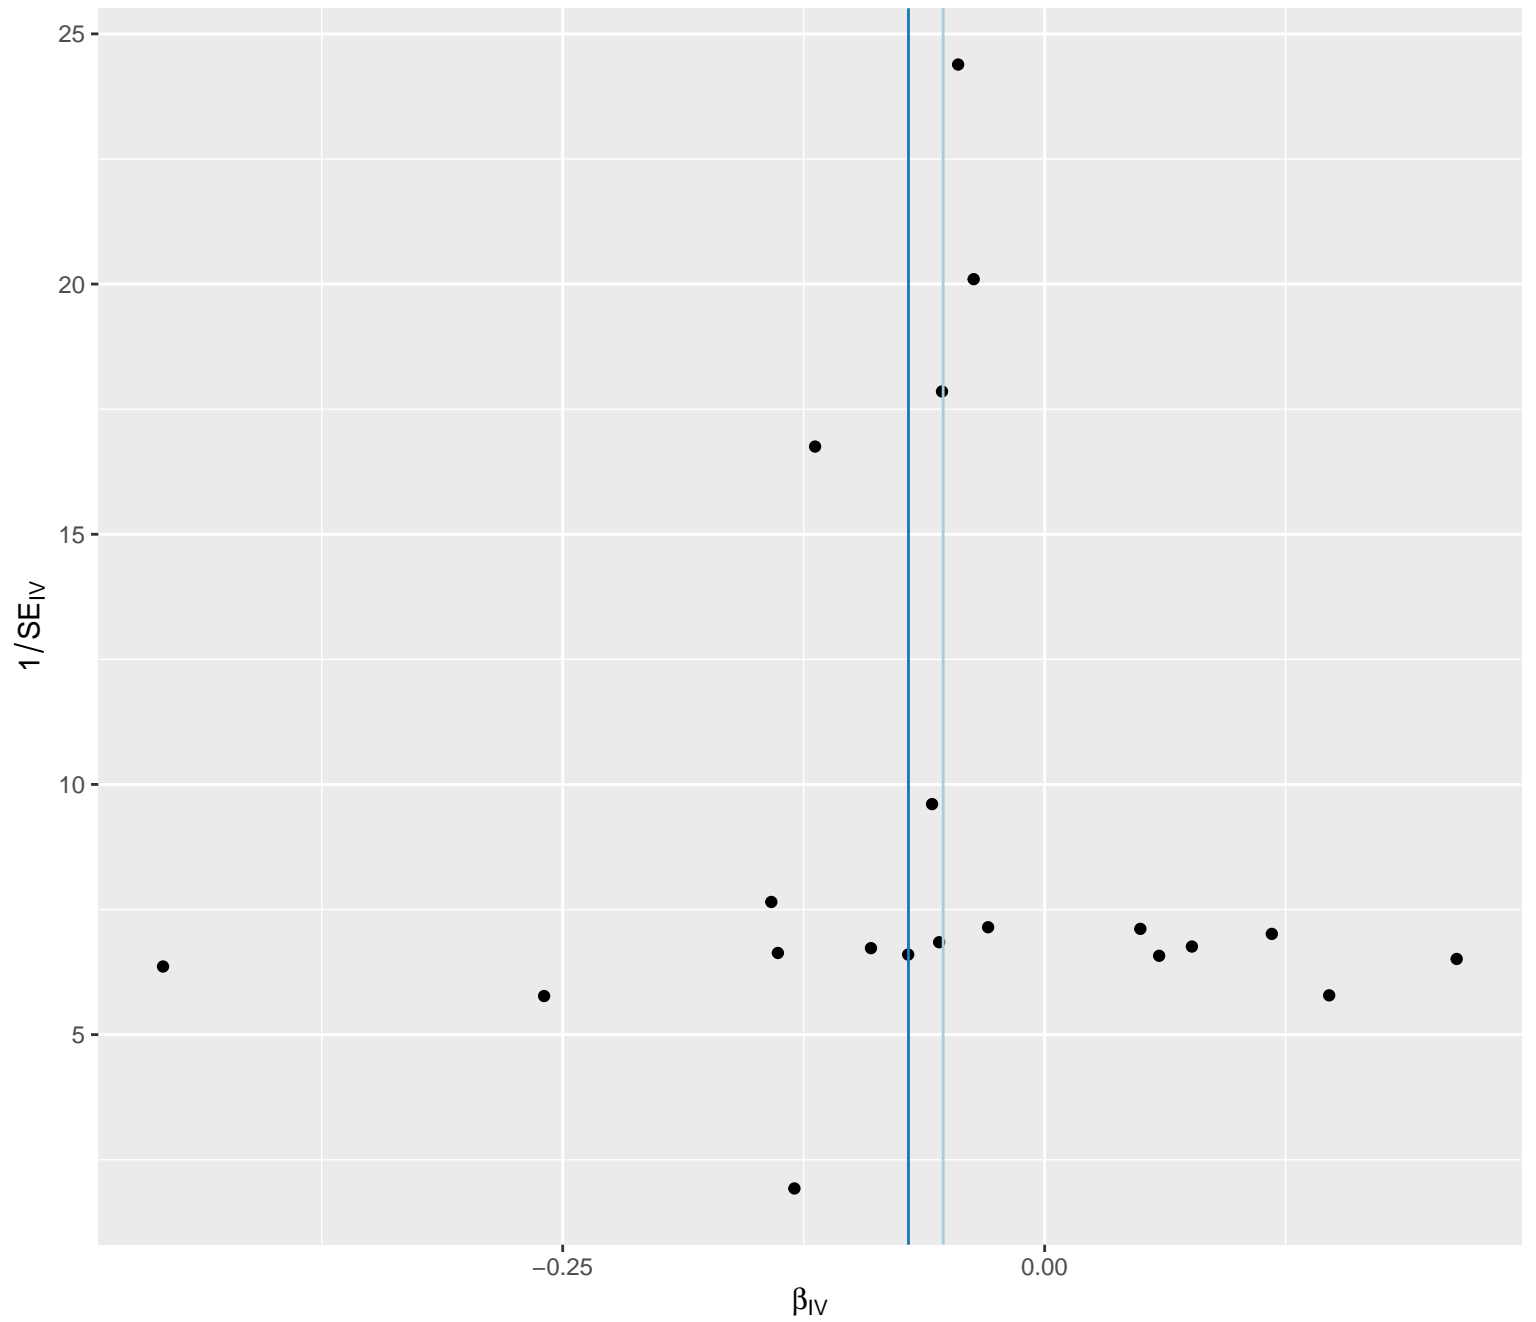

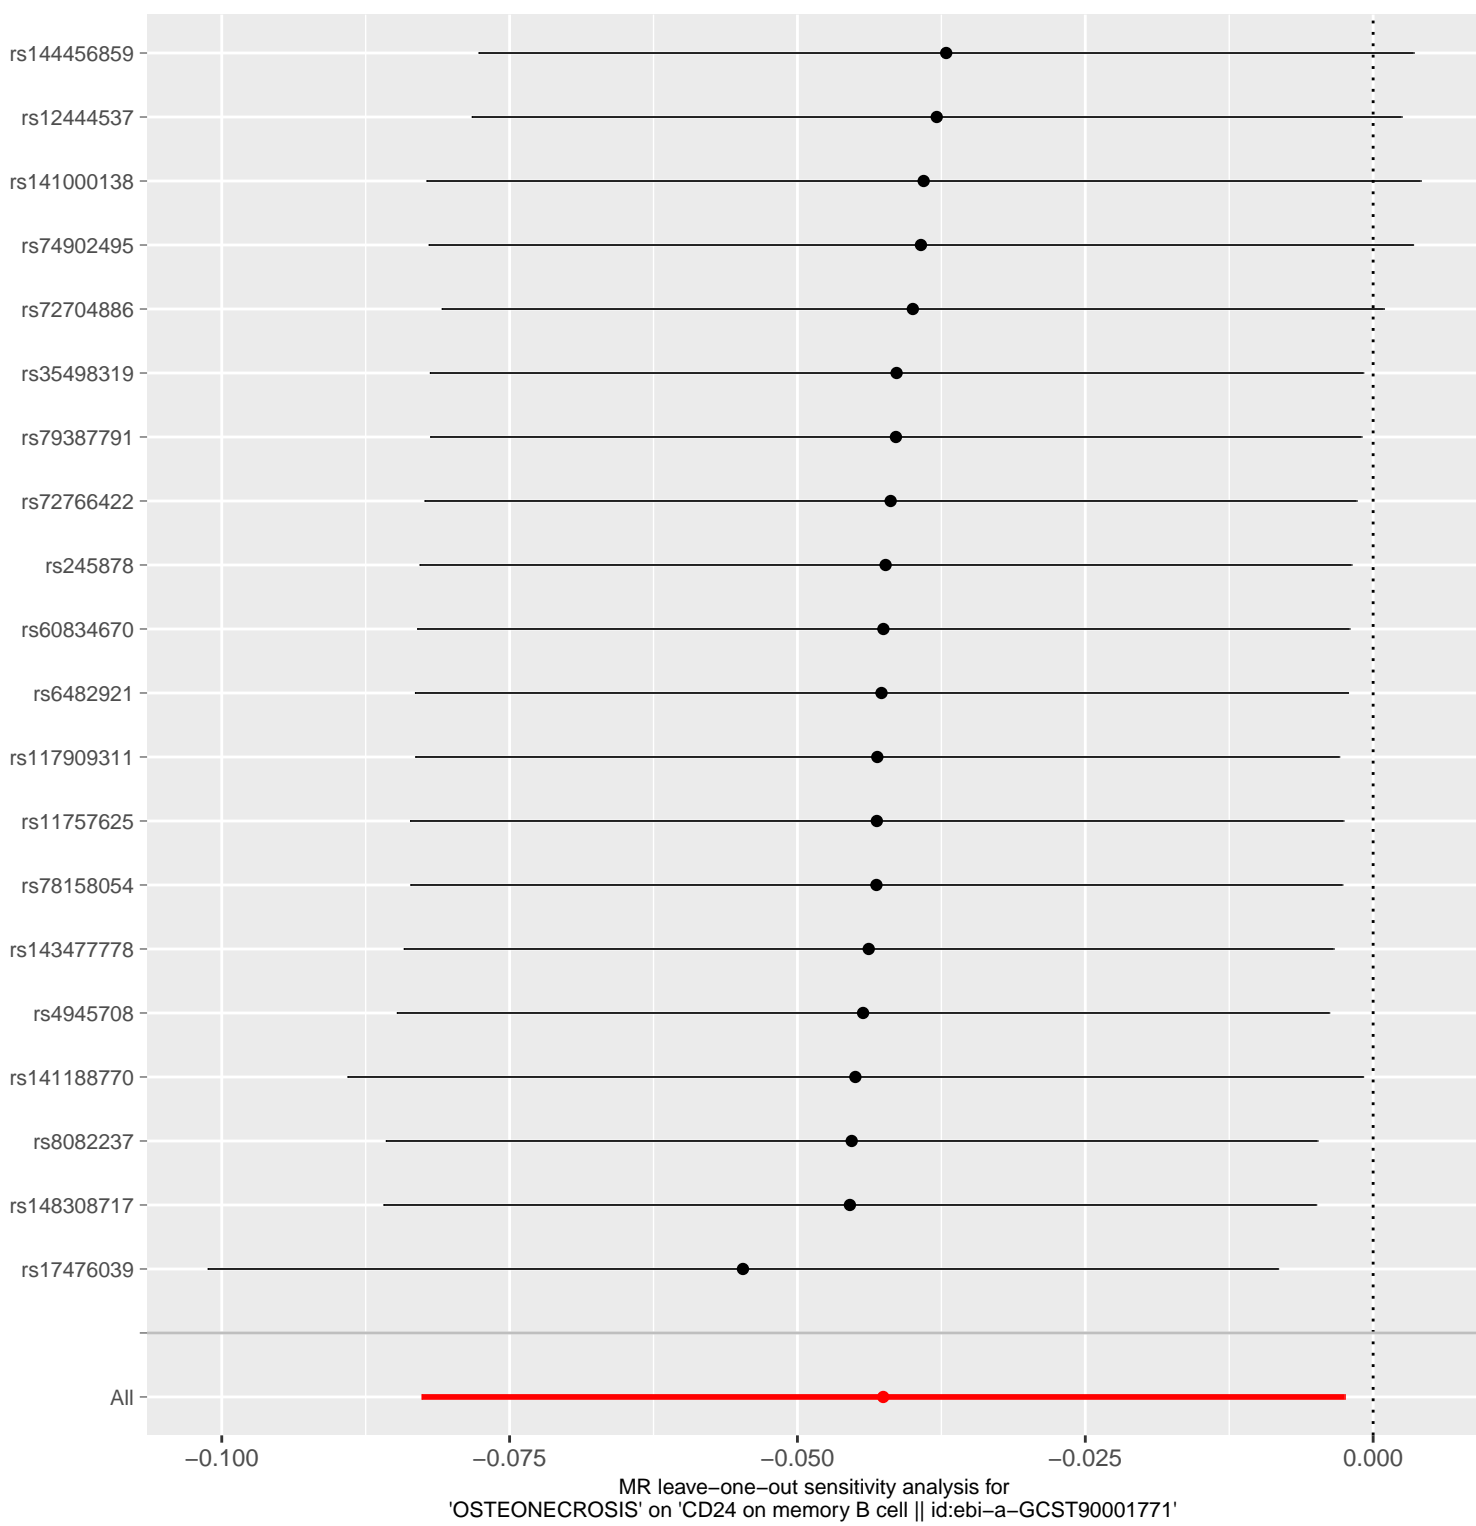

MR Test

- Inverse variance weighted
- MR Egger
- Simple mode
- Weighted median
- Weighted mode

SNP effect on CD24 on memory B cell || id:ebi-a-GCST90001771

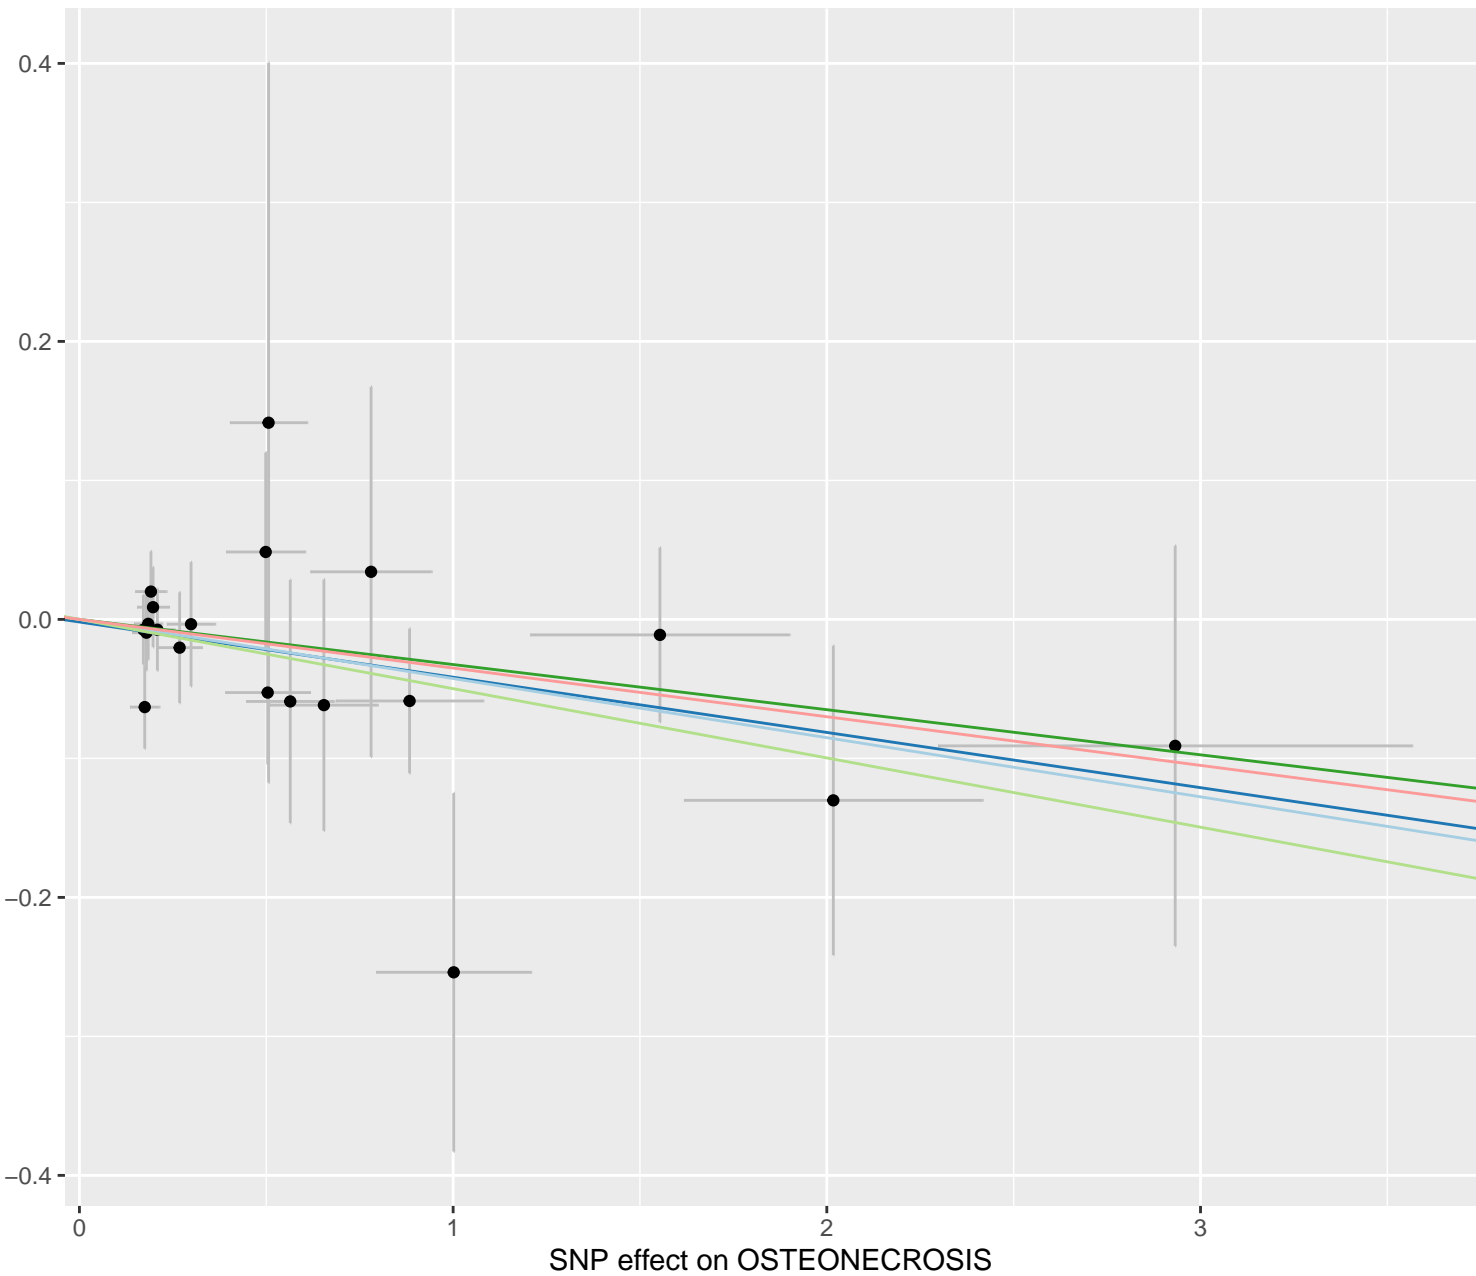

MR Method

- Inverse variance weighted
- MR Egger

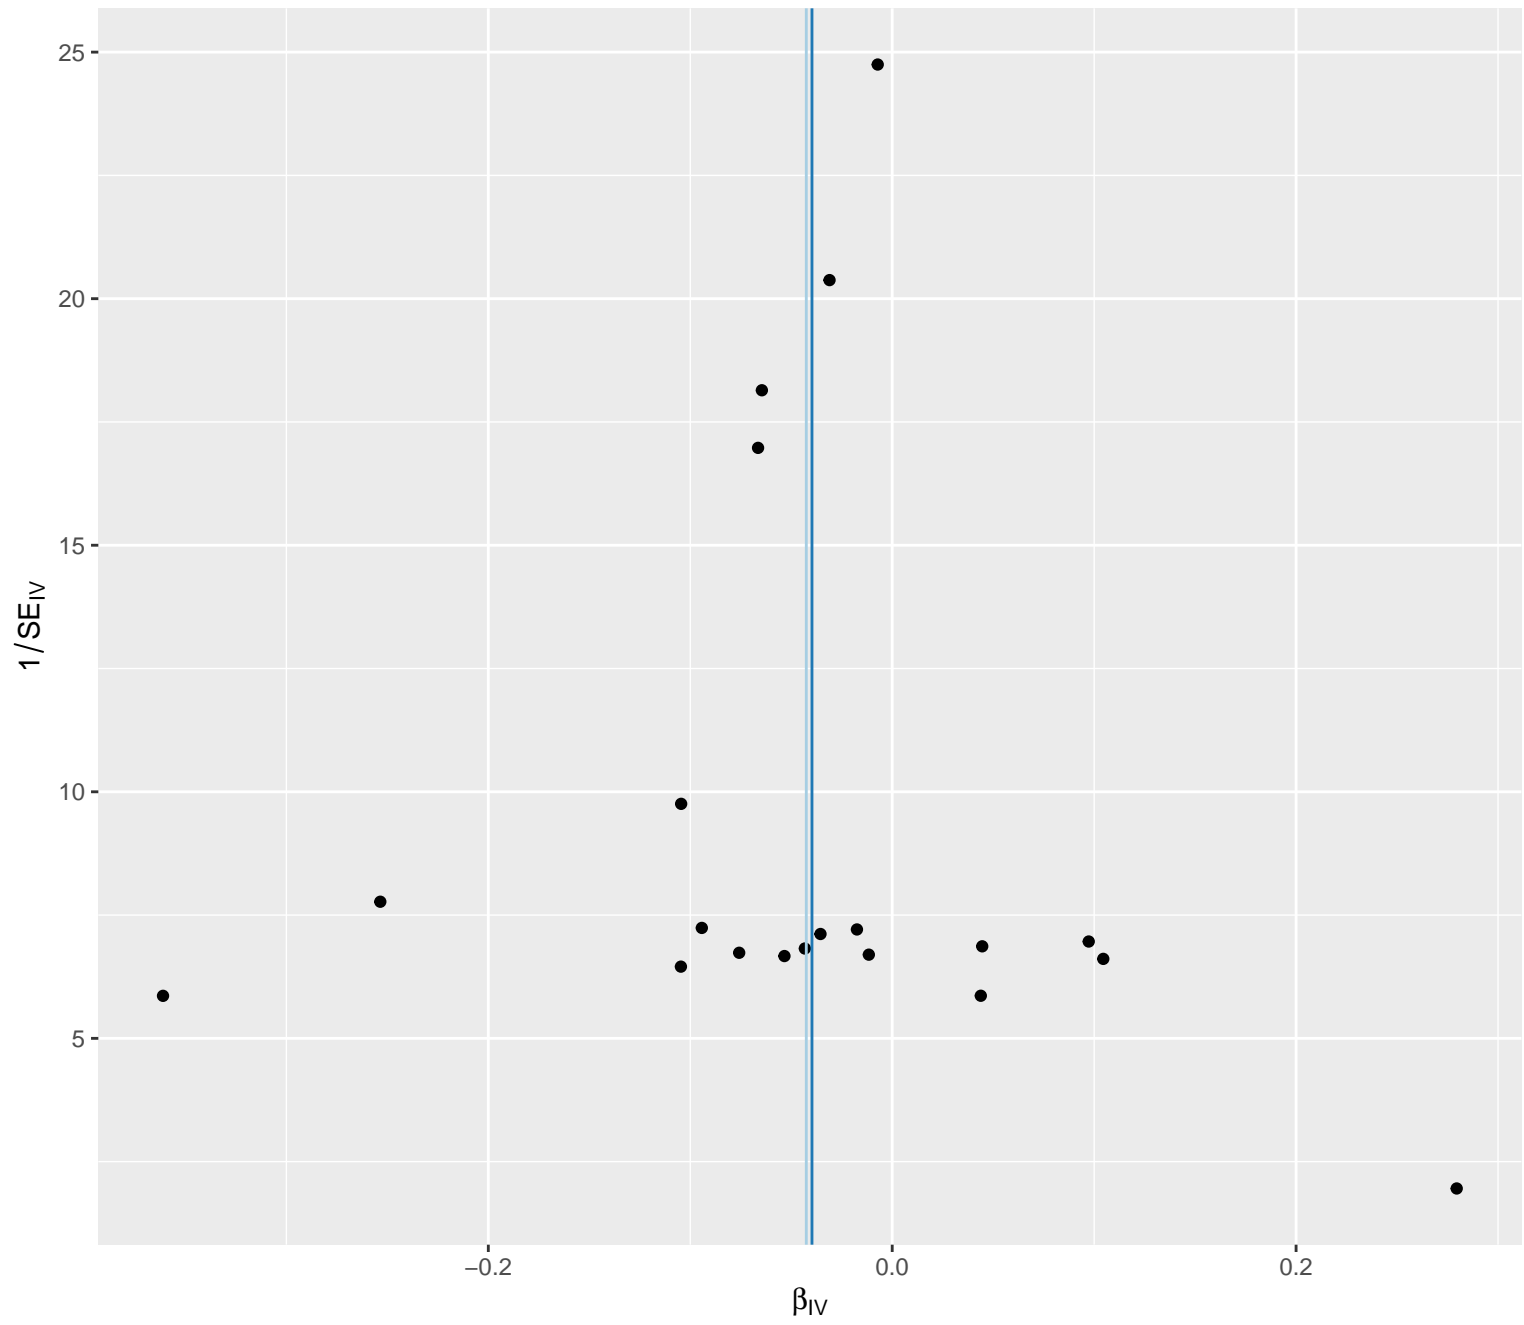

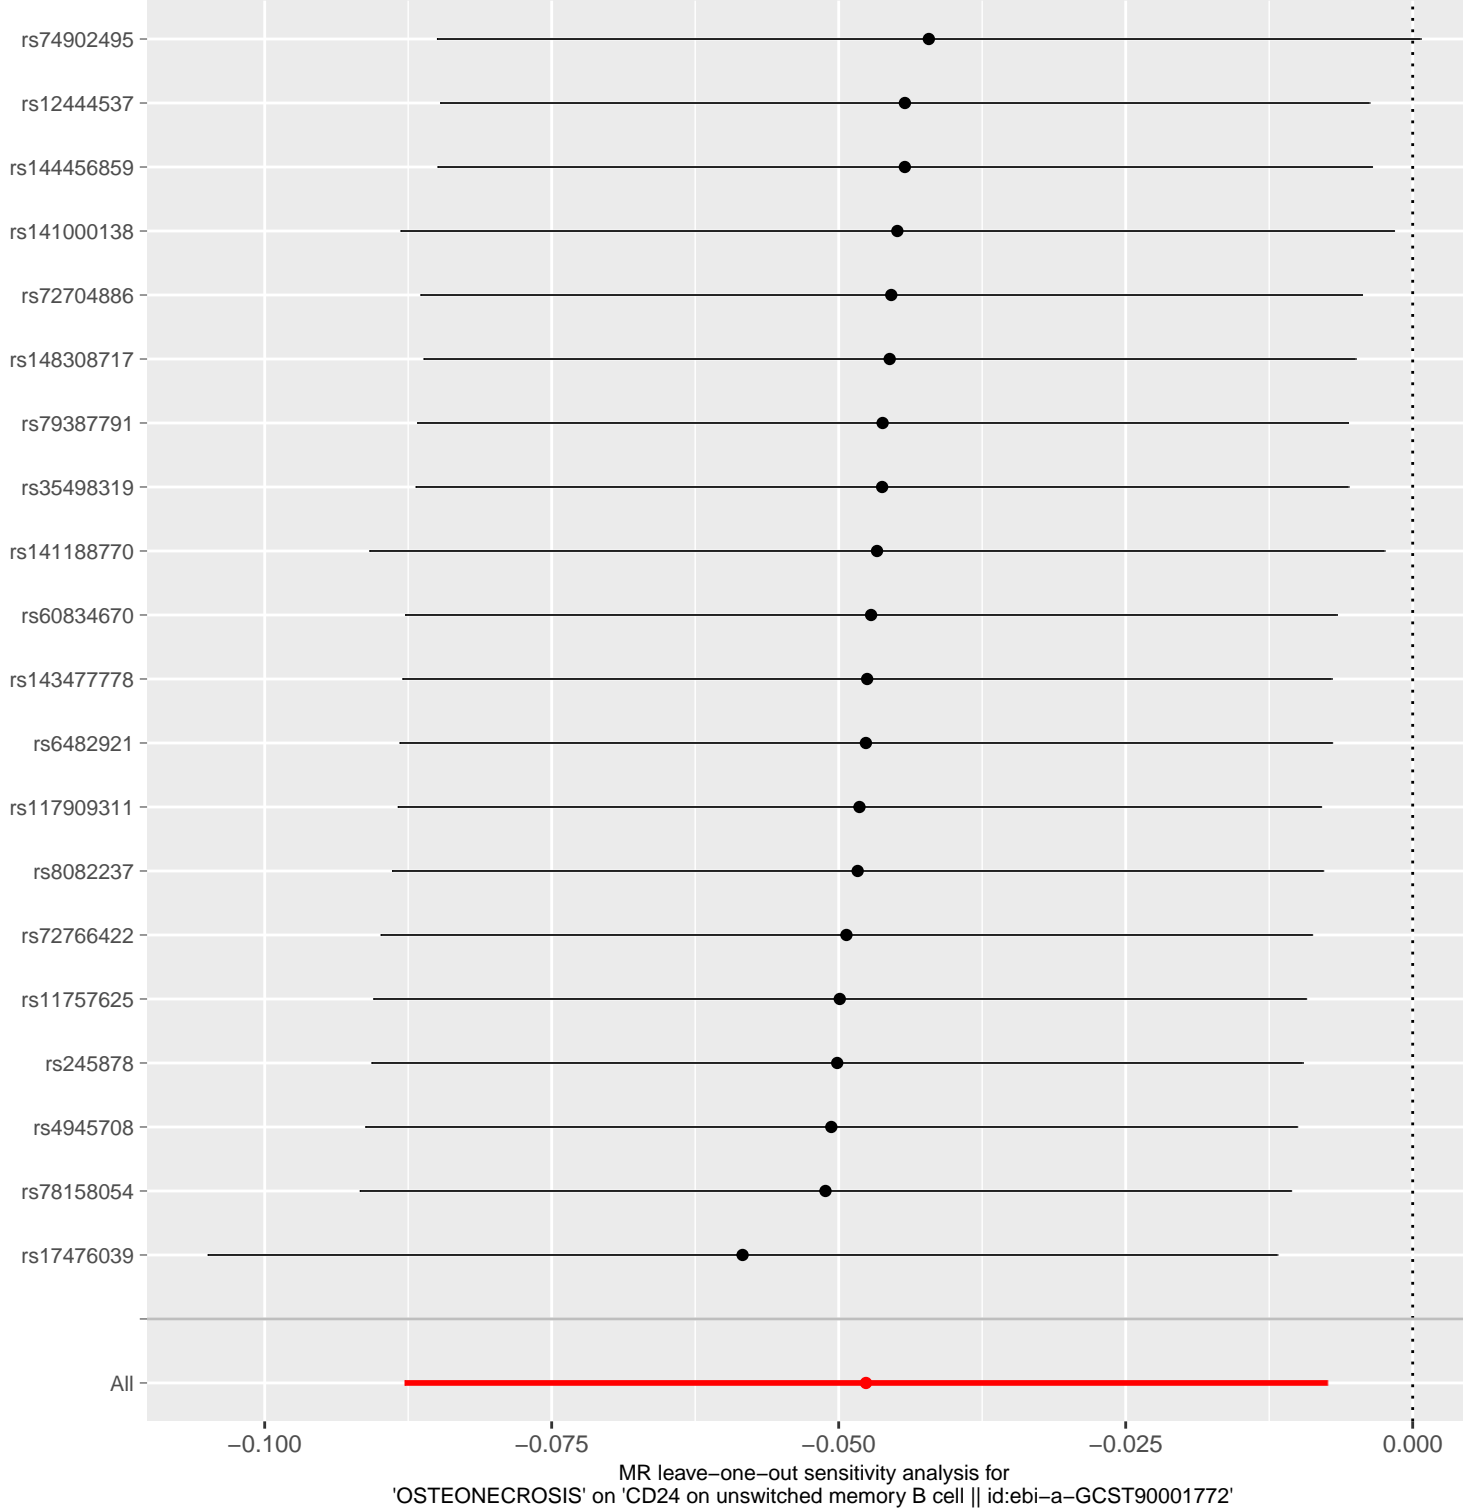

MR Test

- Inverse variance weighted
- MR Egger
- Simple mode
- Weighted median
- Weighted mode

SNP effect on CD24 on unswitched memory B cell || id:ebi-a-GCST90001772

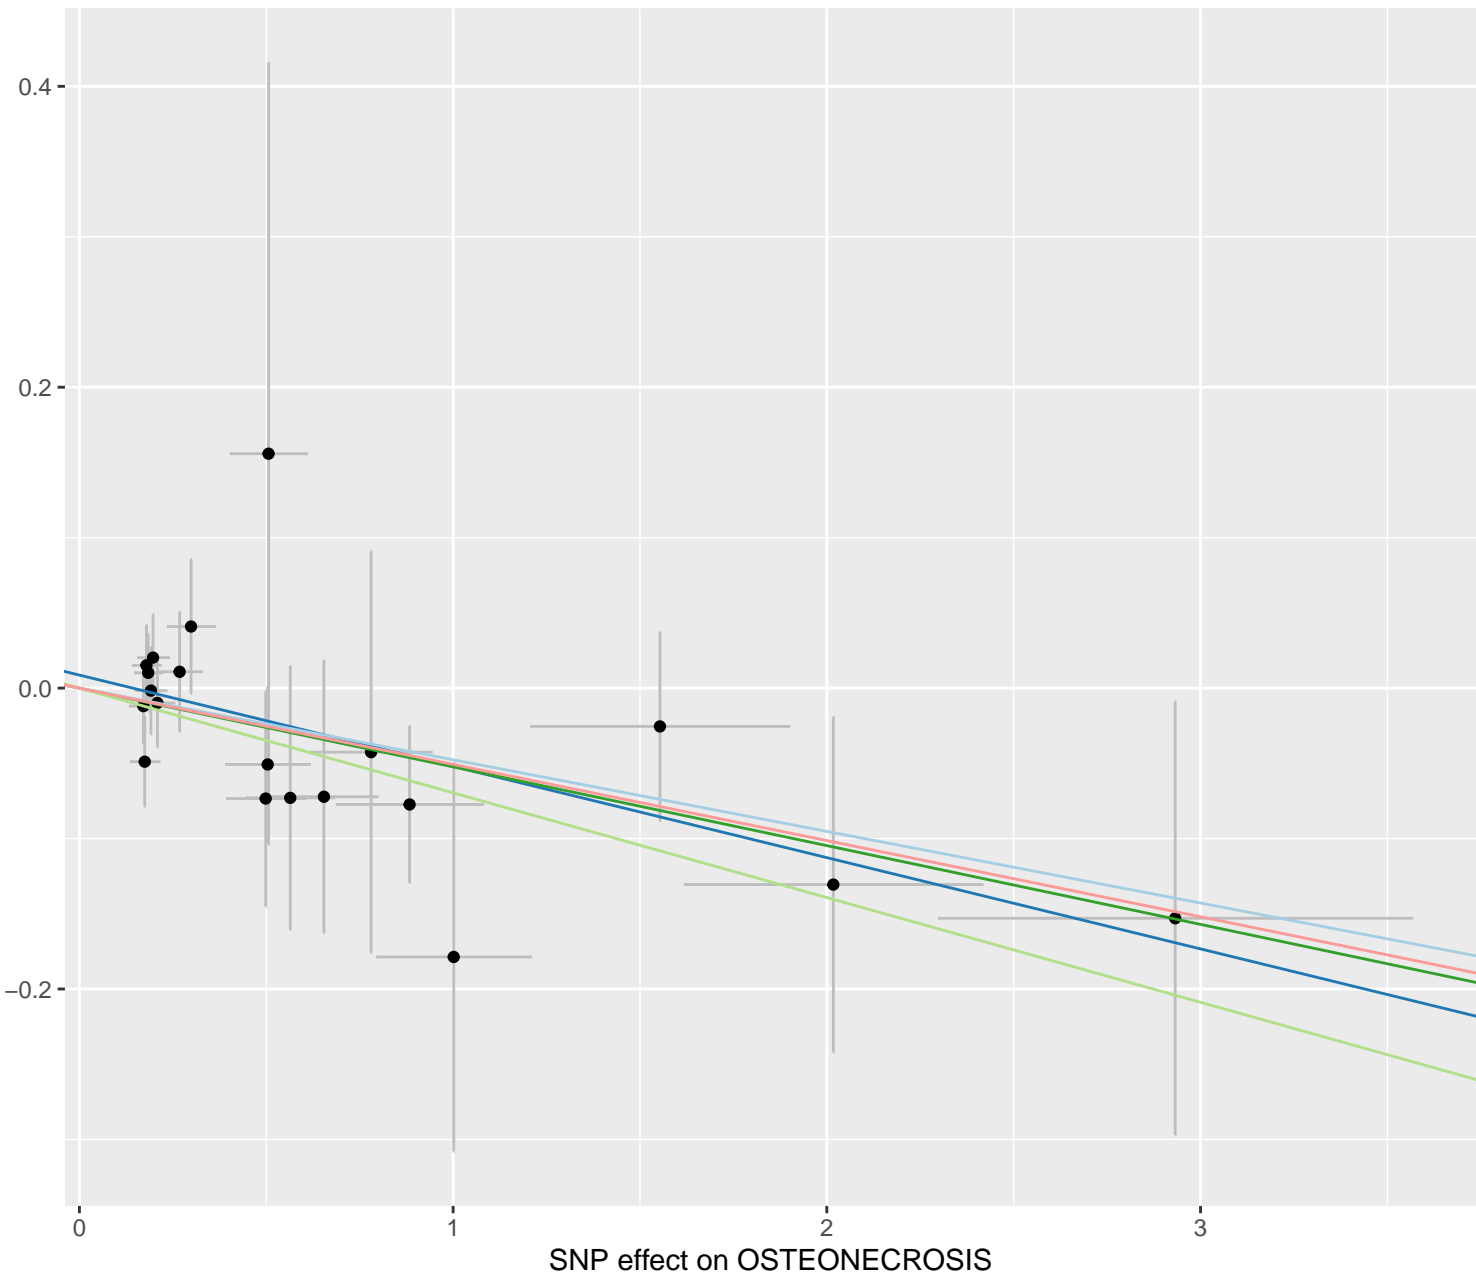

### MR Method

- Inverse variance weighted
- MR Egger

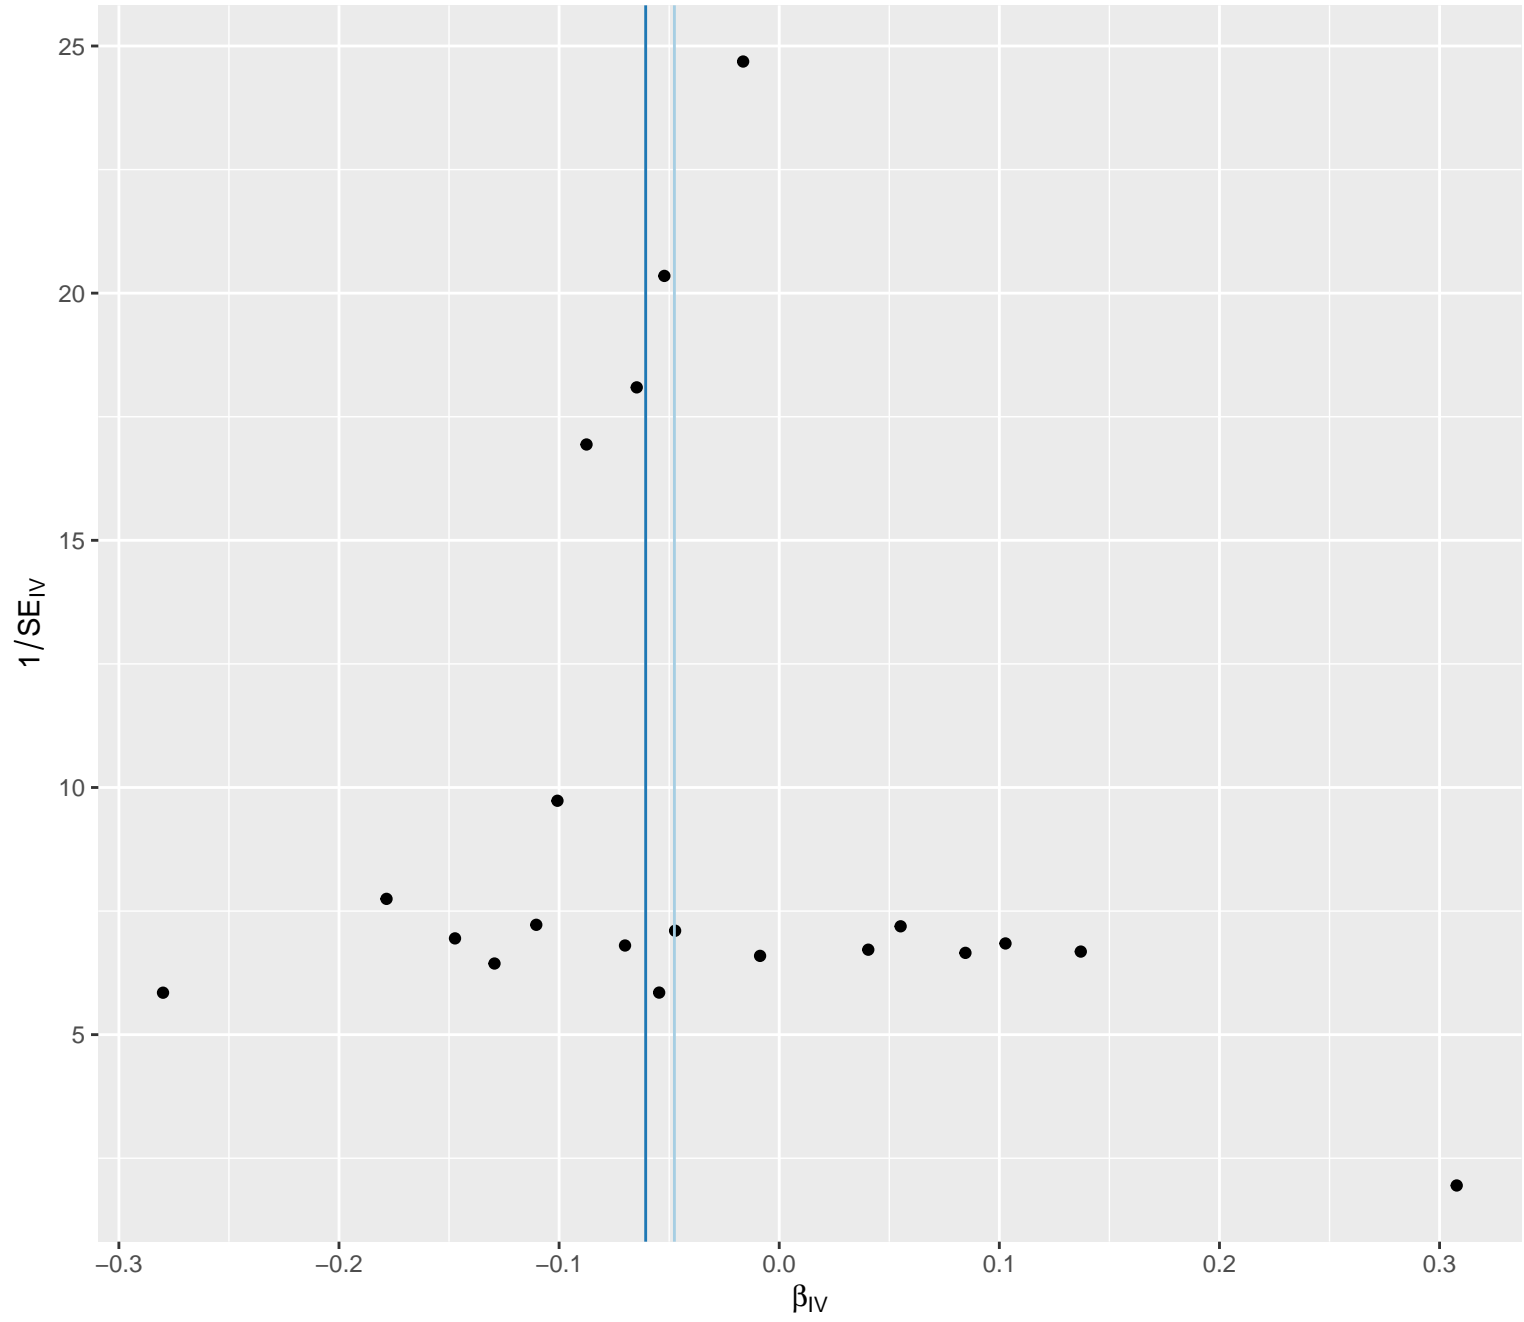

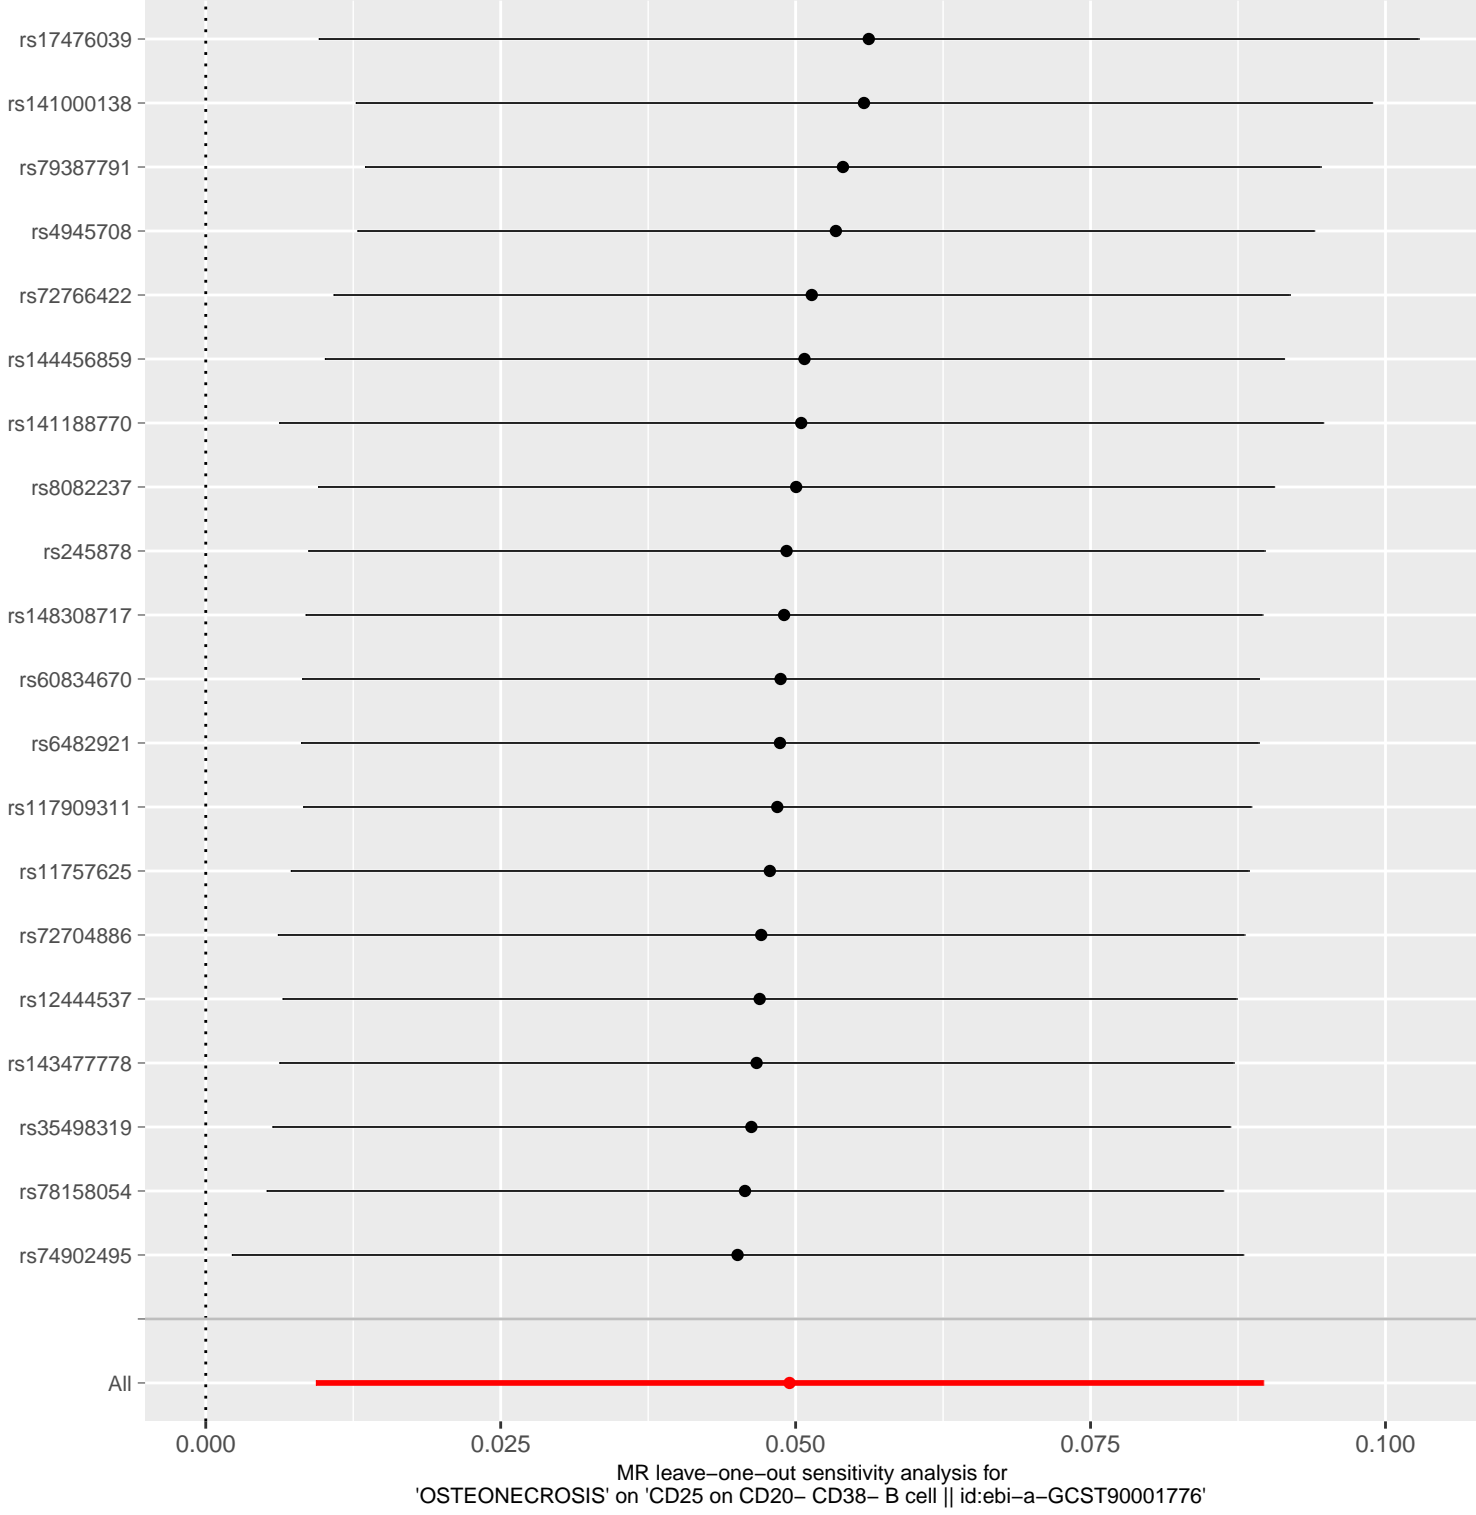



### MR Test

- Inverse variance weighted
- MR Egger
- Simple mode
- Weighted median
- Weighted mode

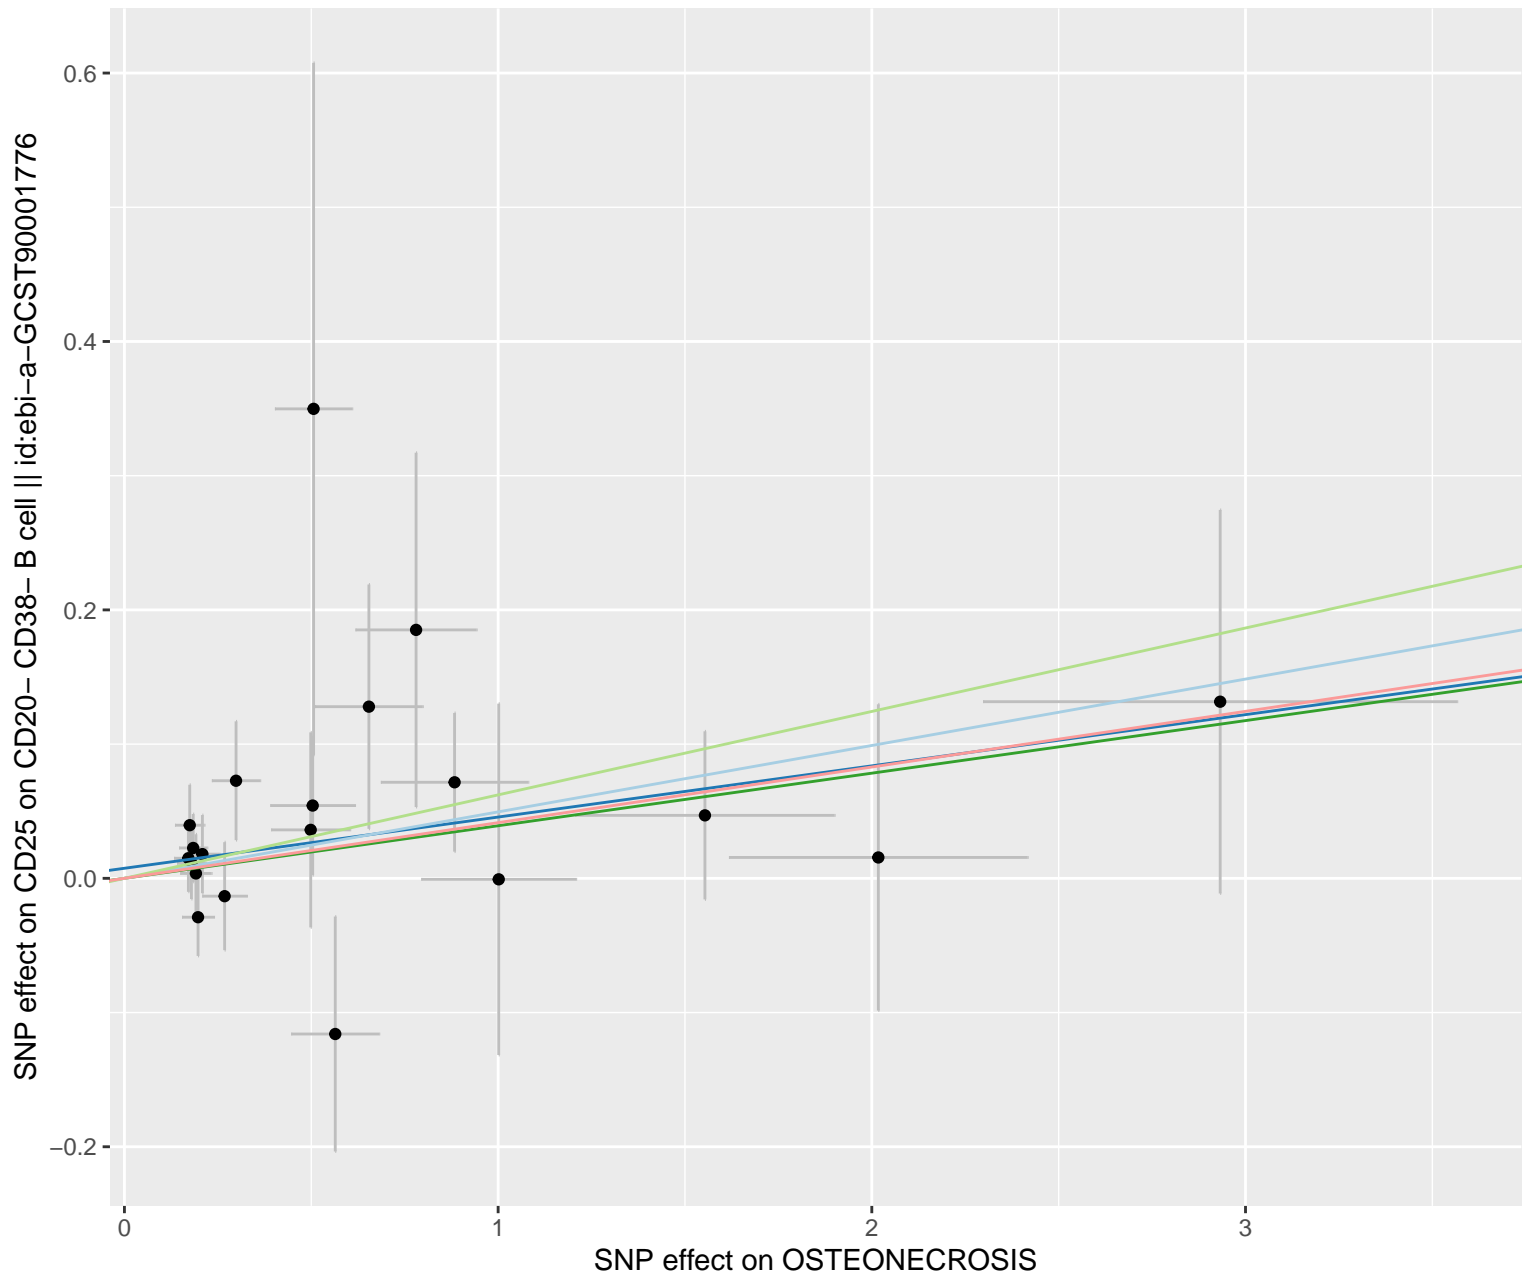

### MR Method

- Inverse variance weighted
- MR Egger

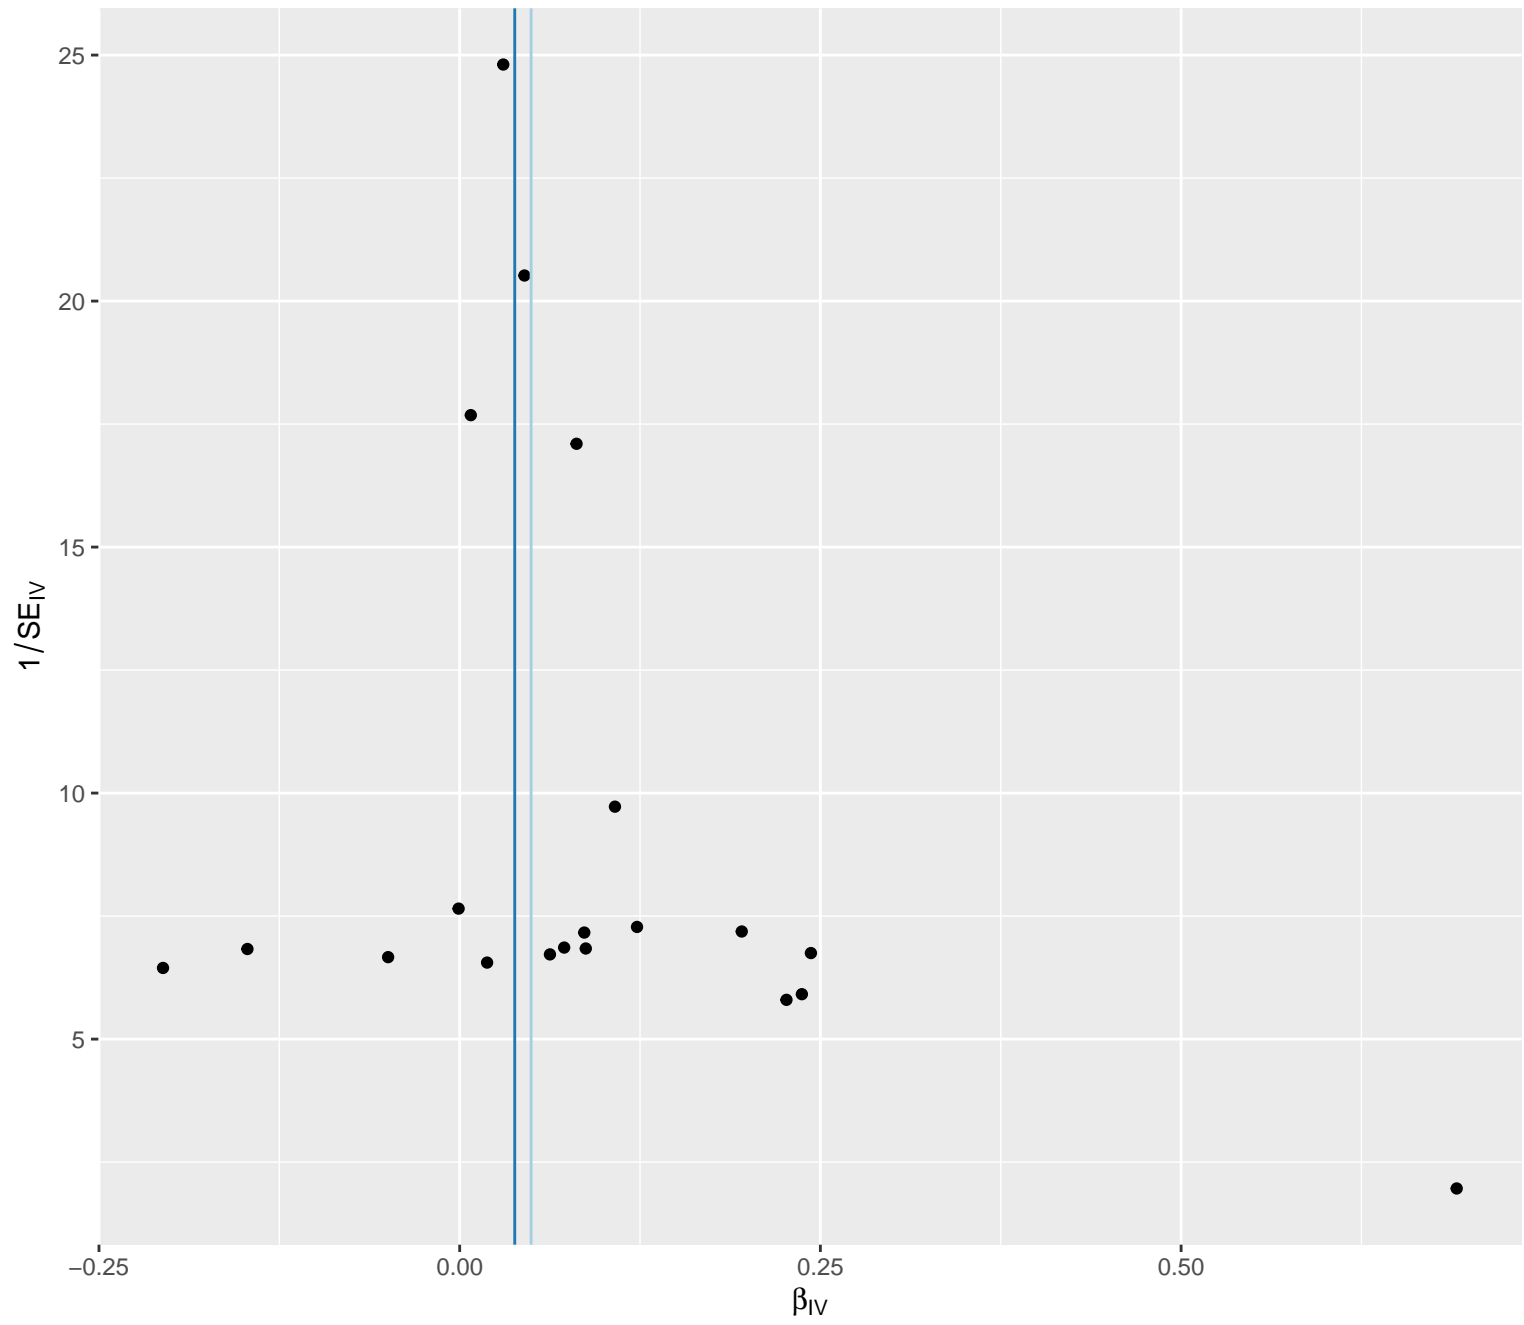

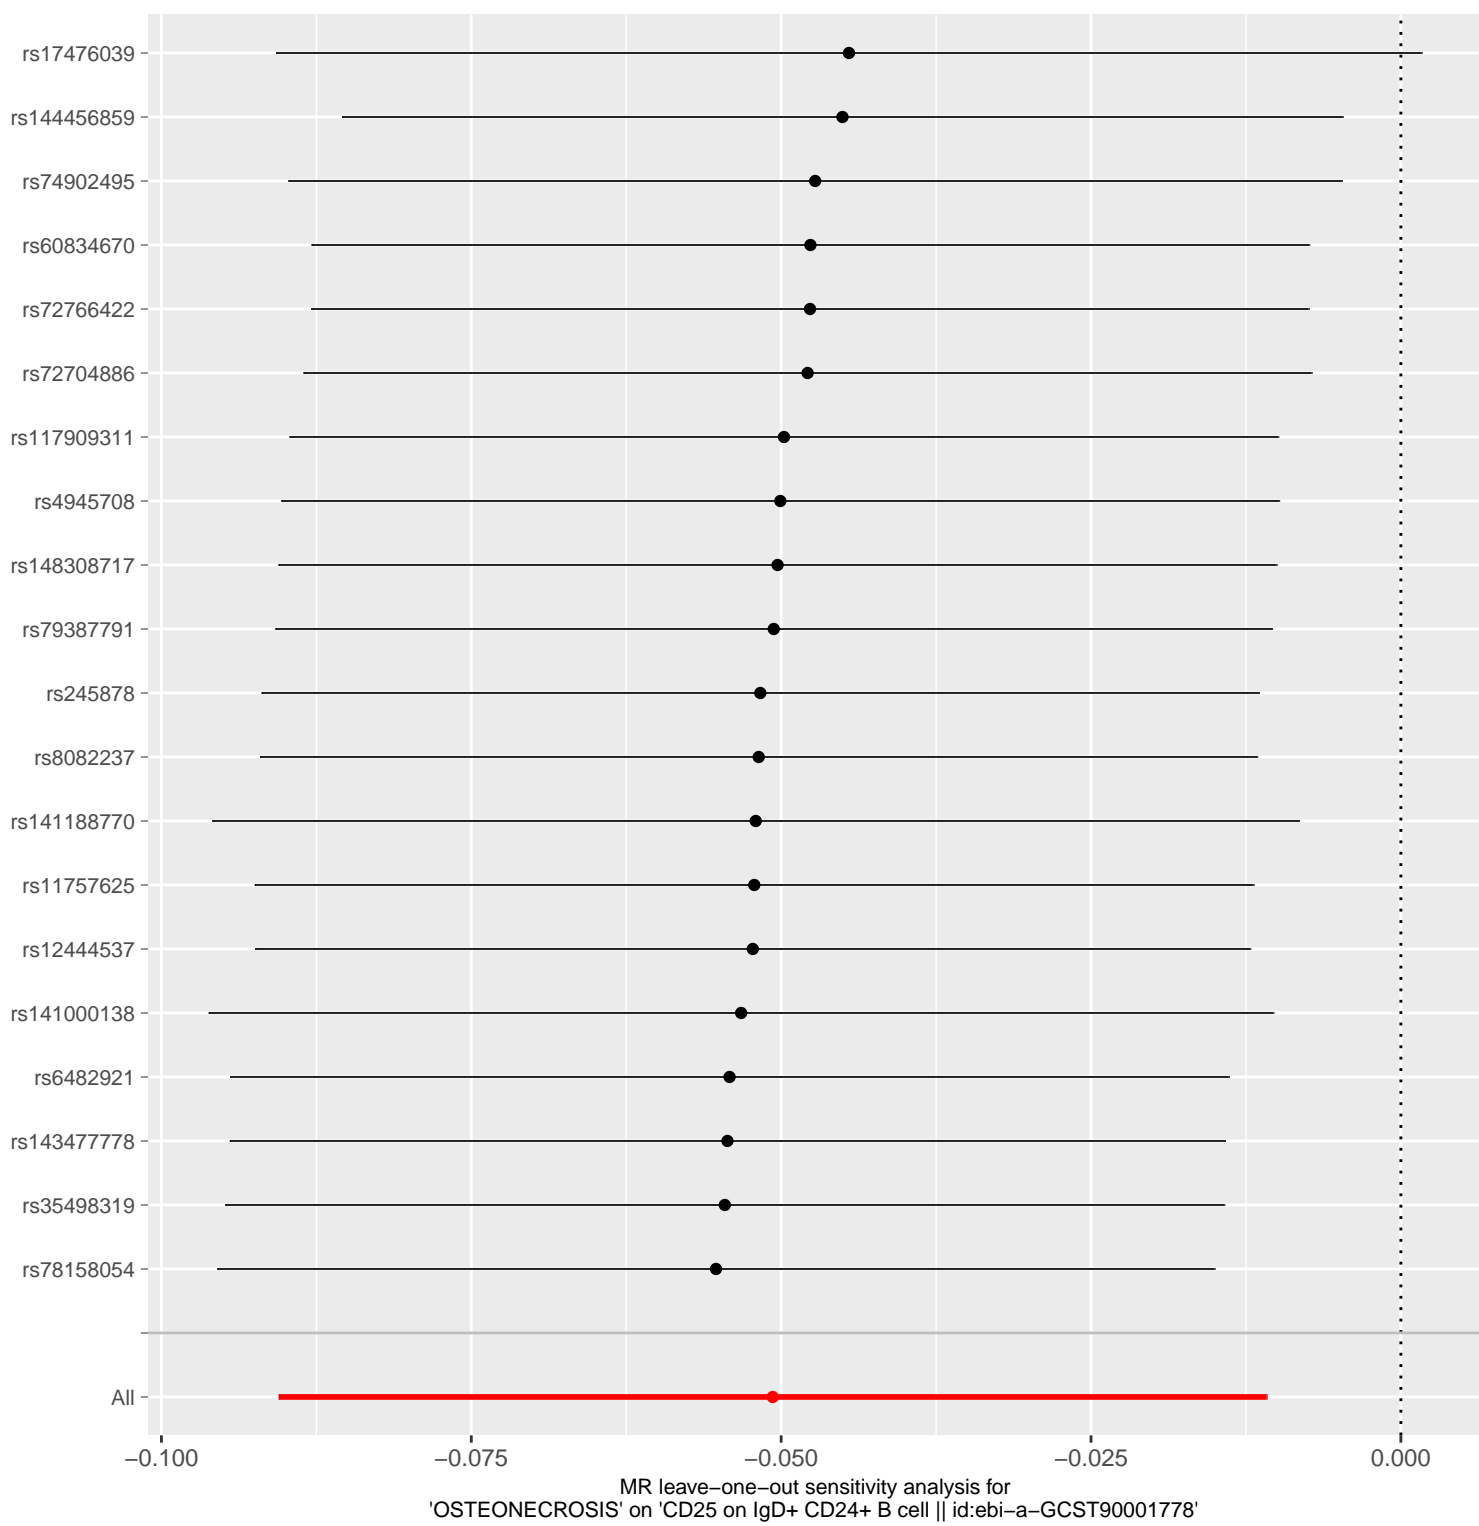

### MR Test

- Inverse variance weighted
- MR Egger
- Simple mode
- Weighted median
- Weighted mode

SNP effect on CD25 on IgD+ CD24+ B cell || id:ebi-a-GCST90001778

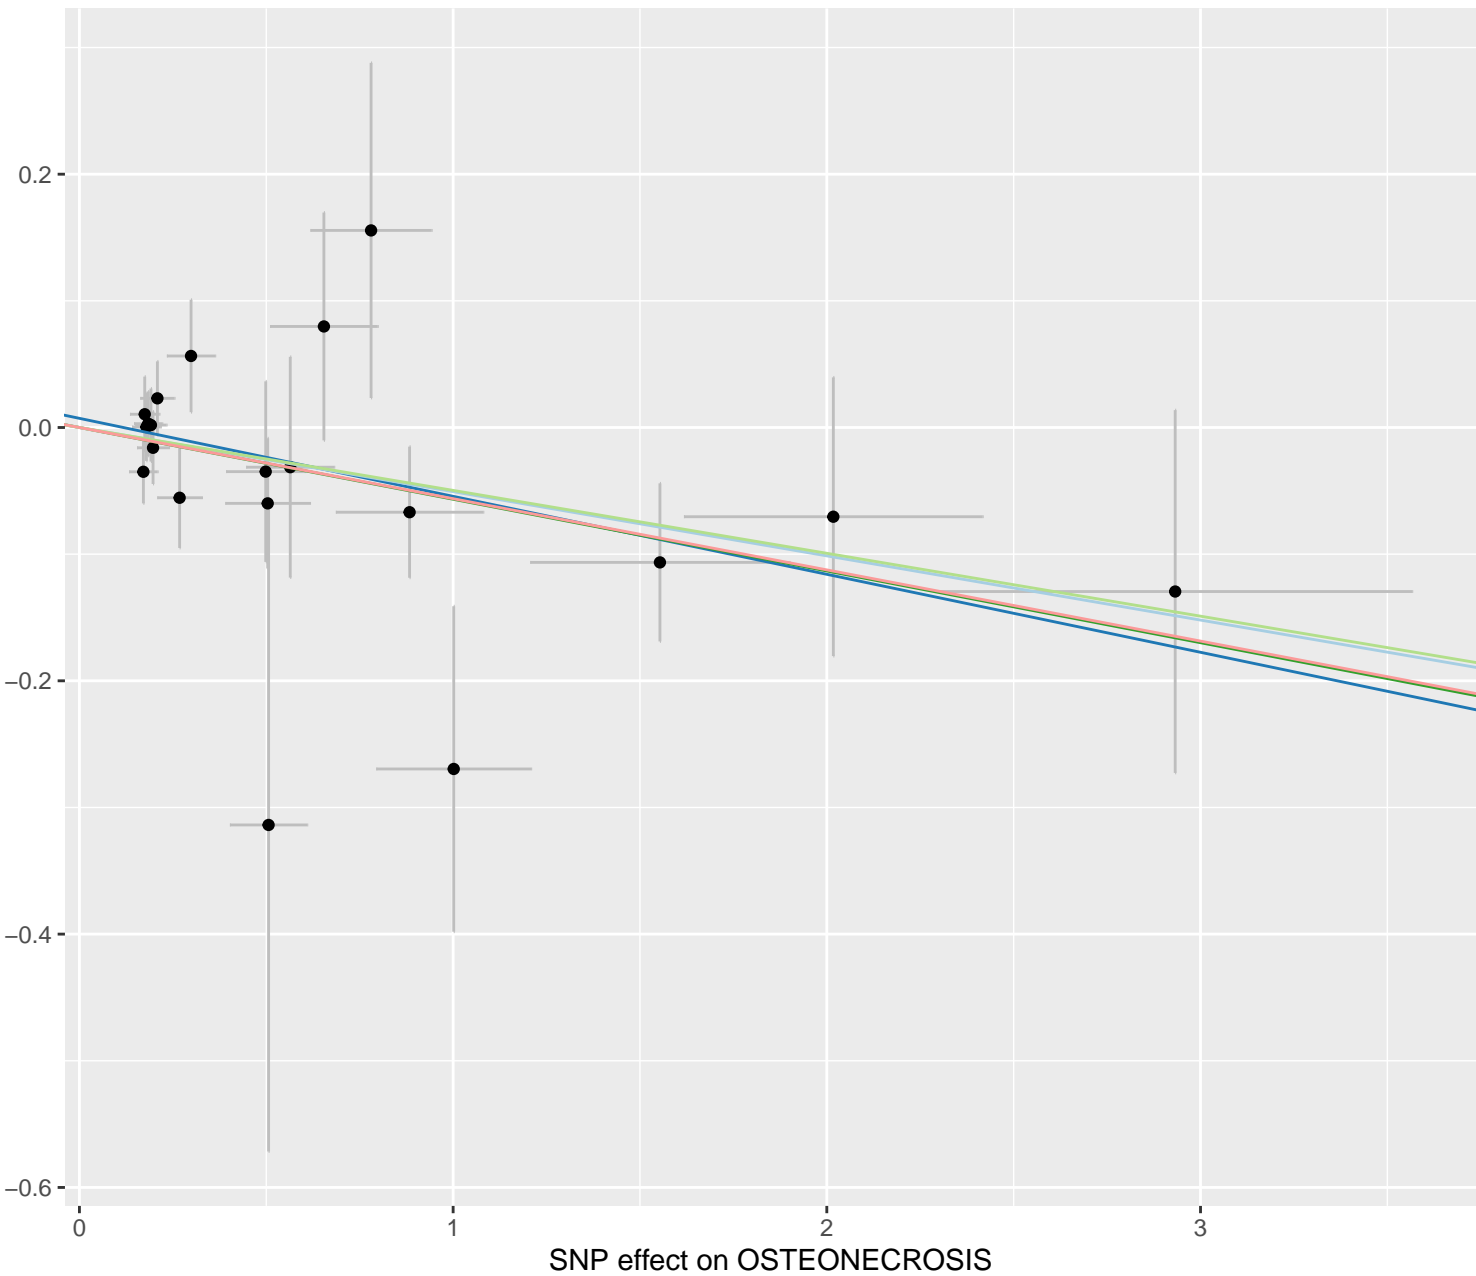

MR Method

- Inverse variance weighted
- MR Egger

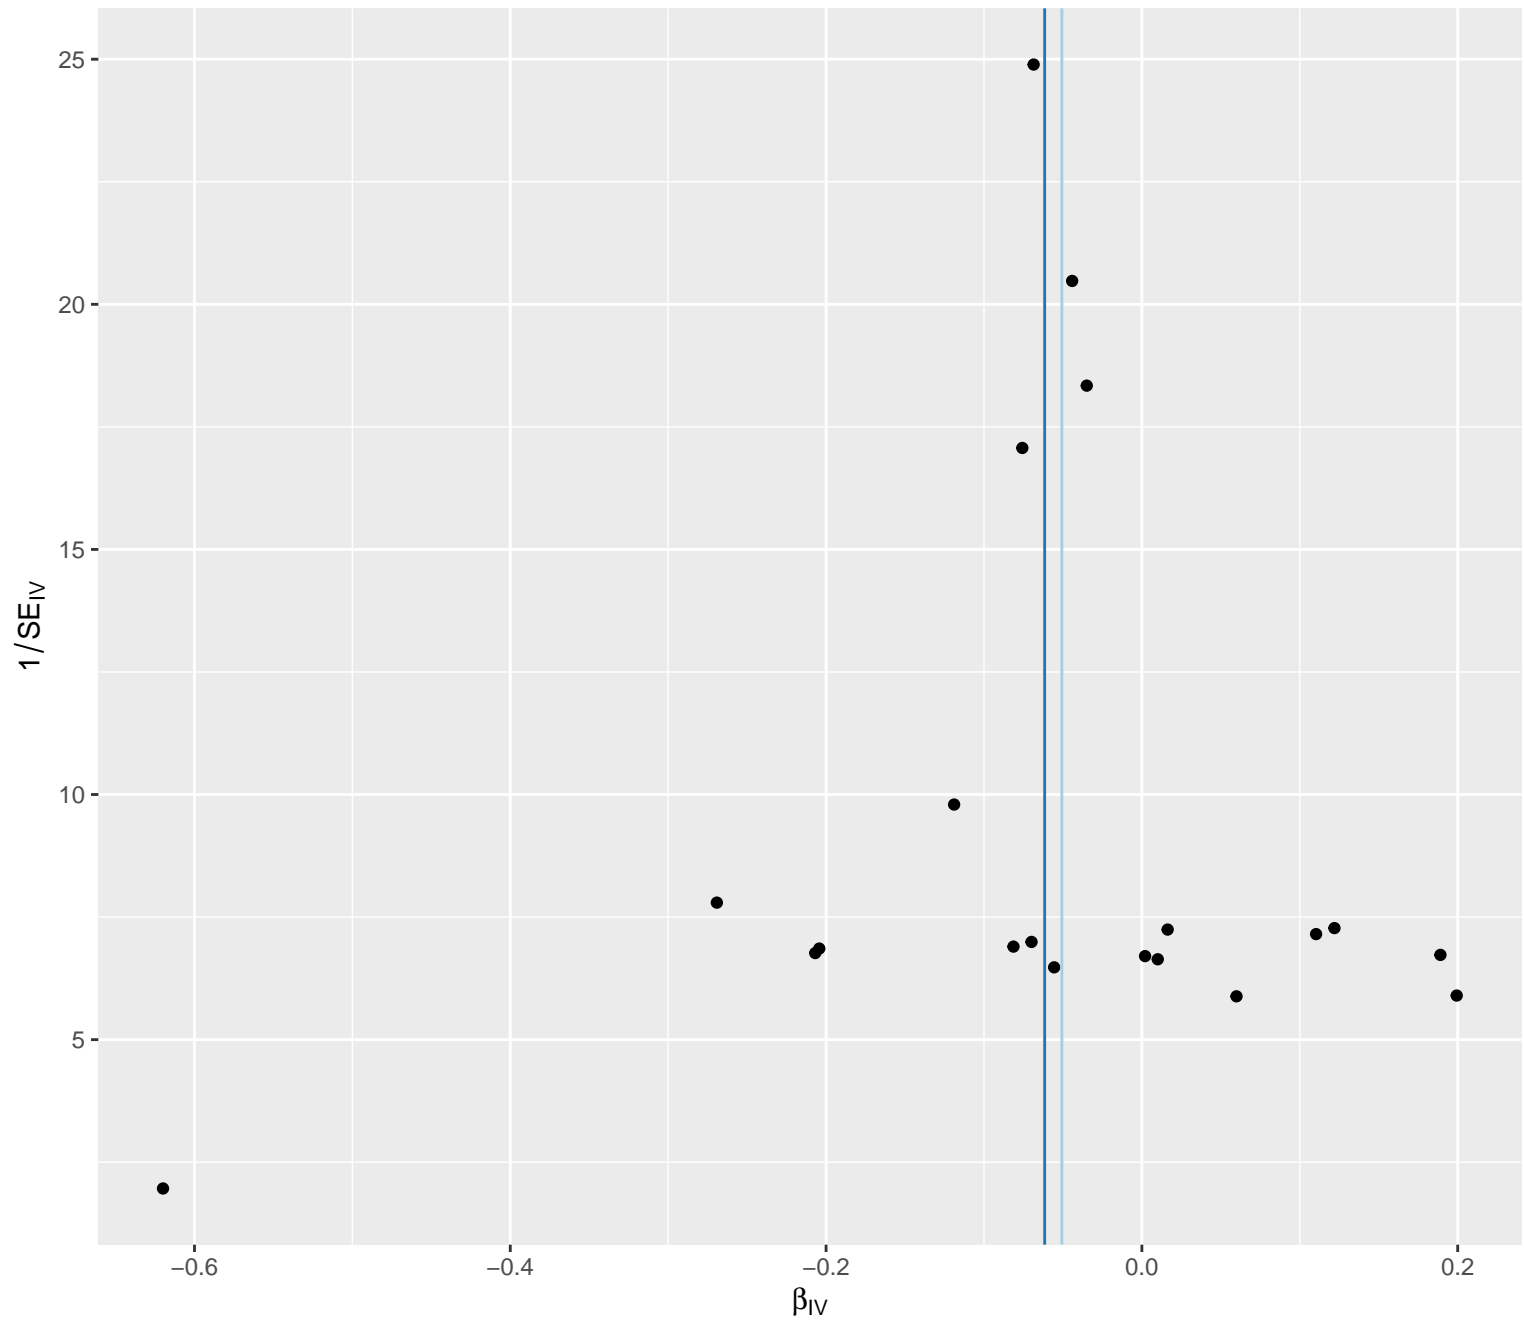

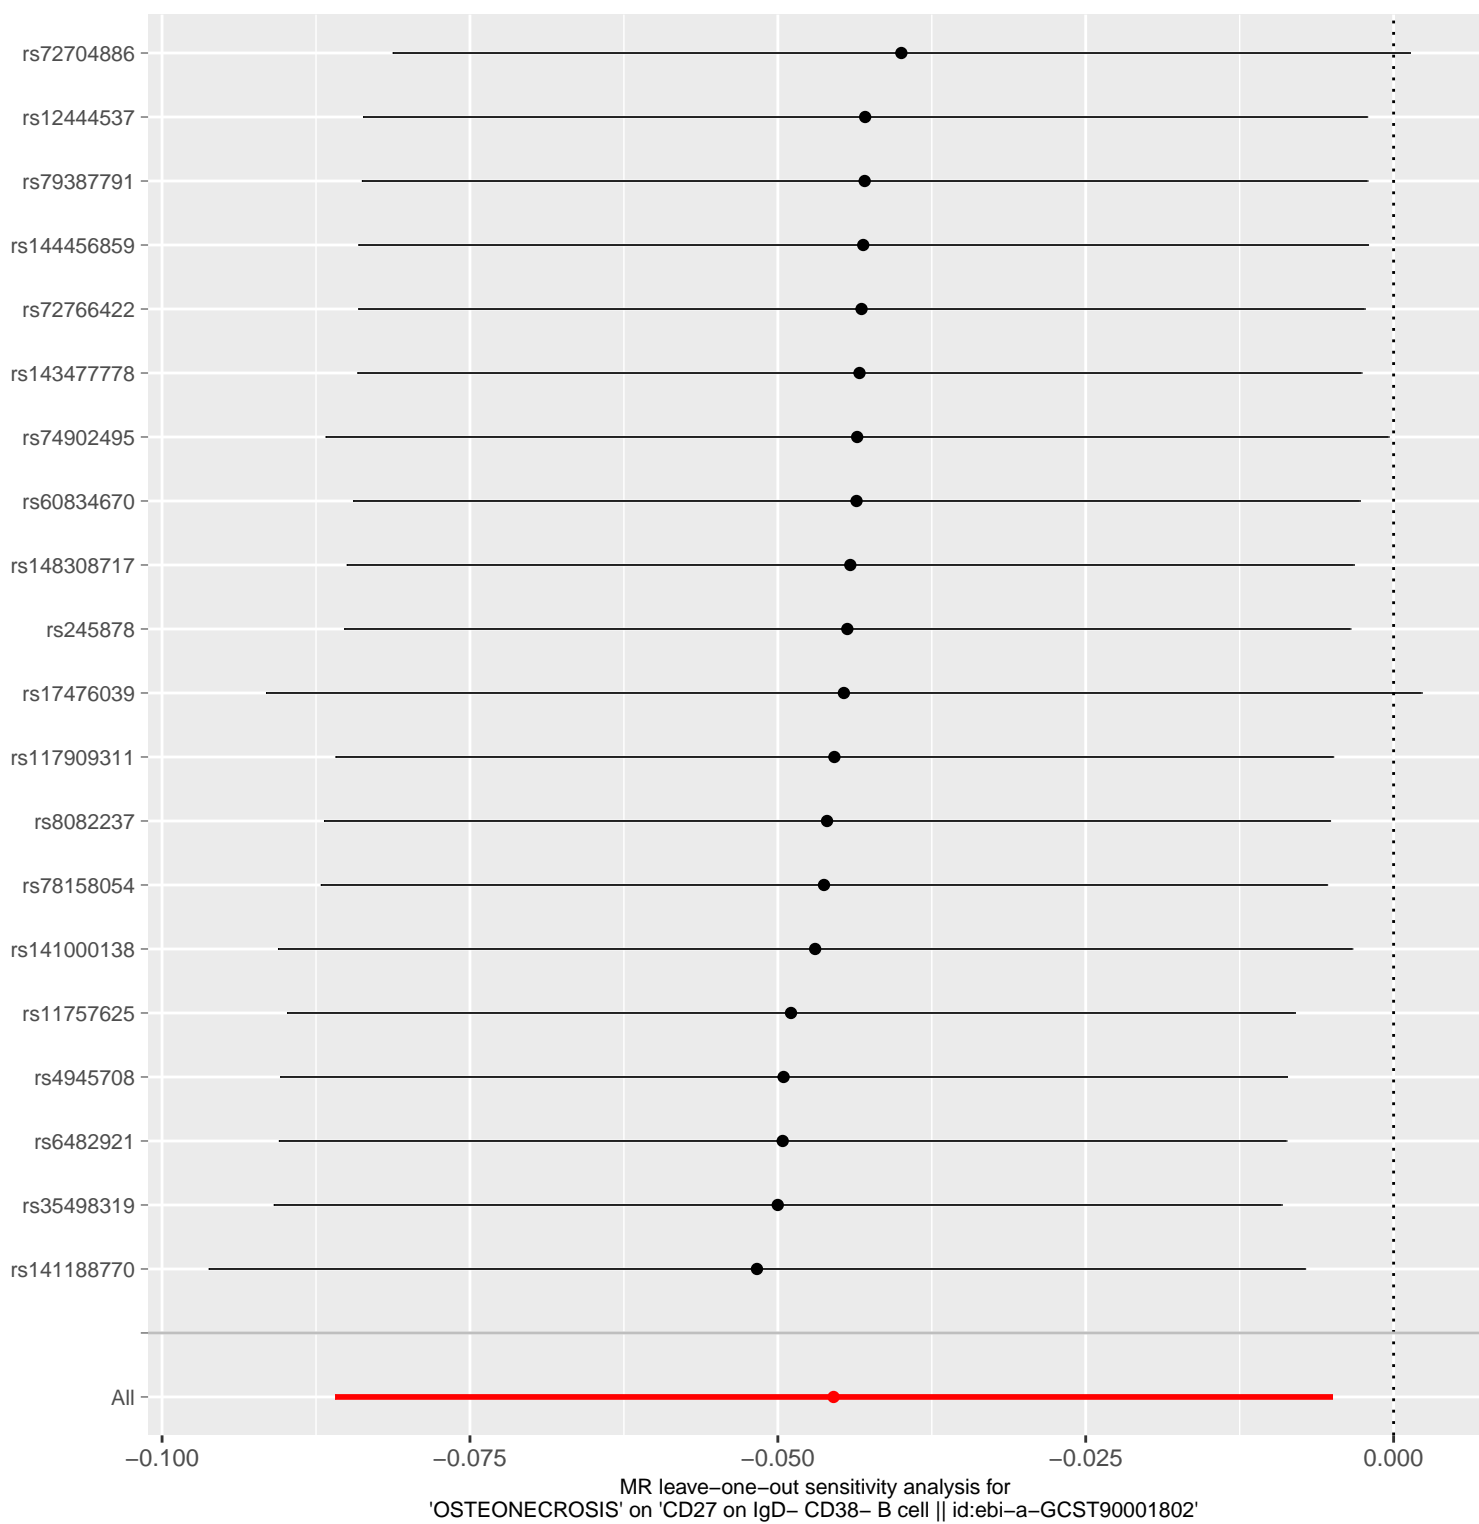

MR Test

- Inverse variance weighted
- MR Egger
- Simple mode
- Weighted median
- Weighted mode

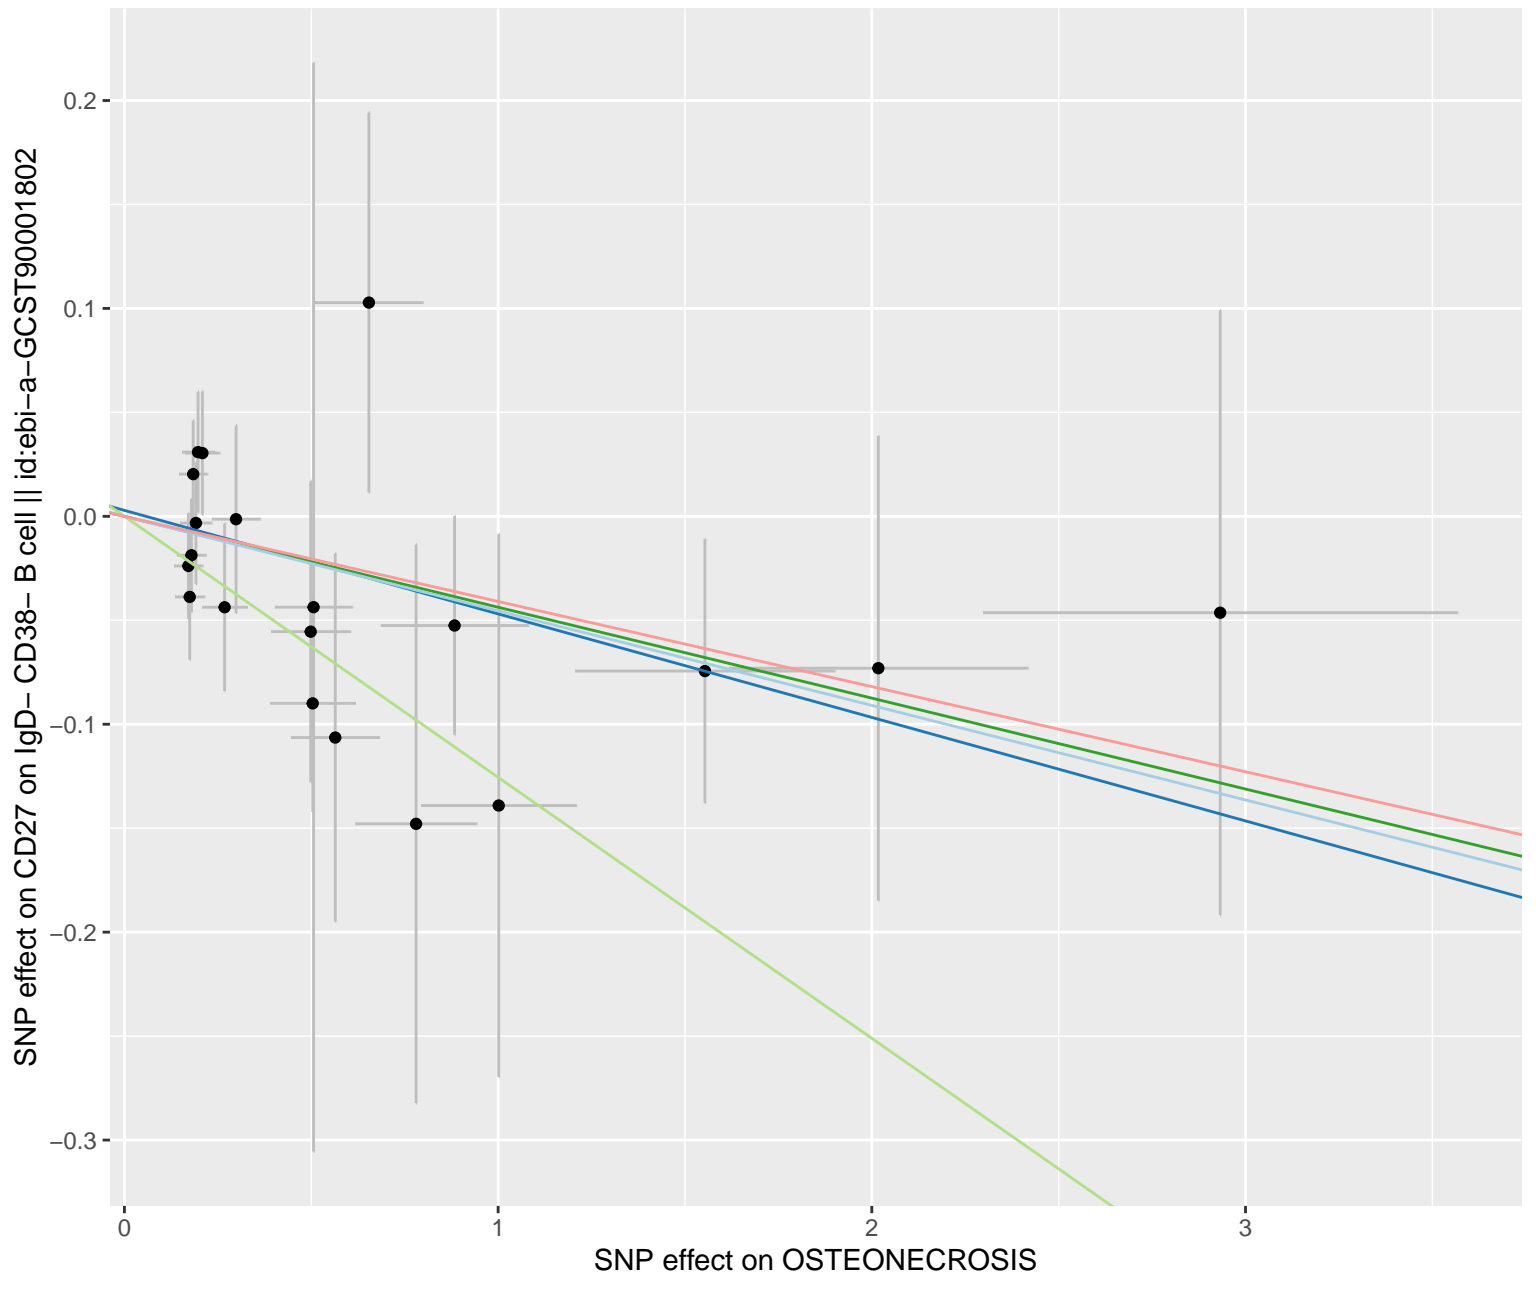

### MR Method

- Inverse variance weighted
- MR Egger

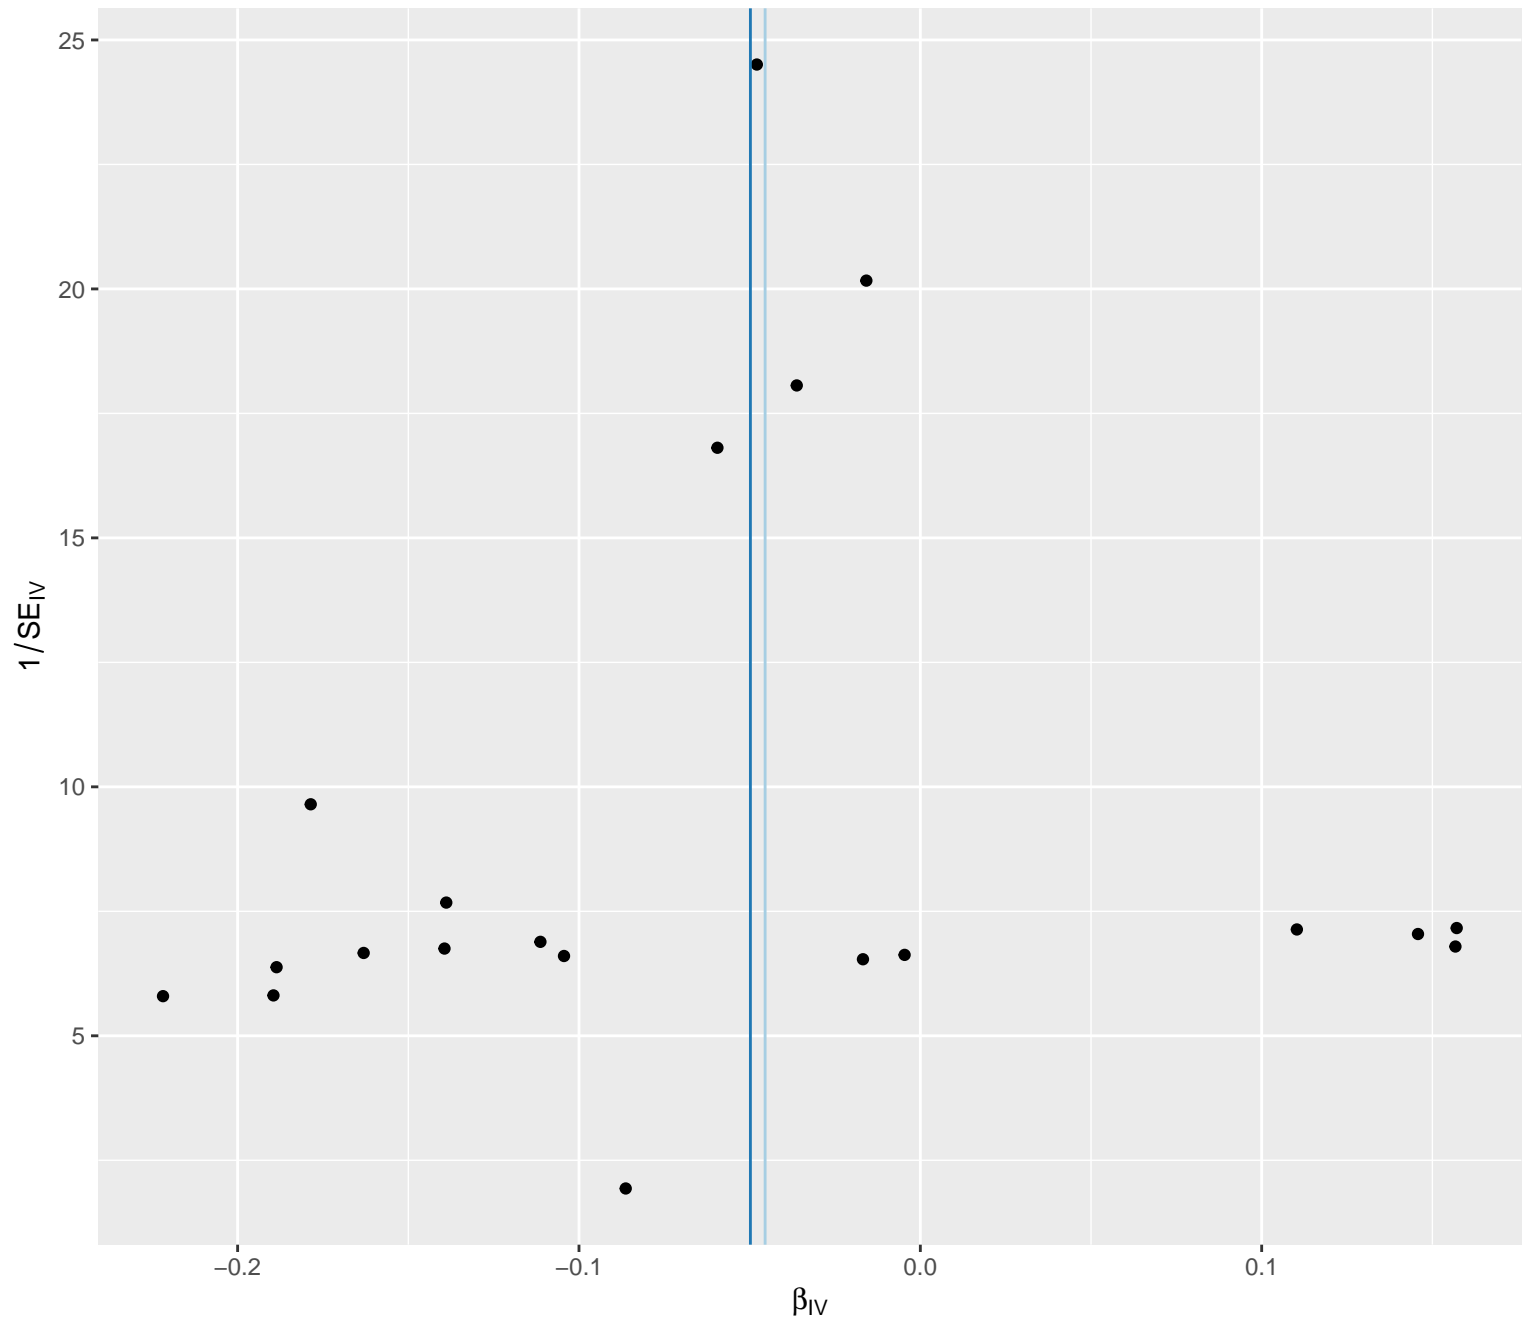



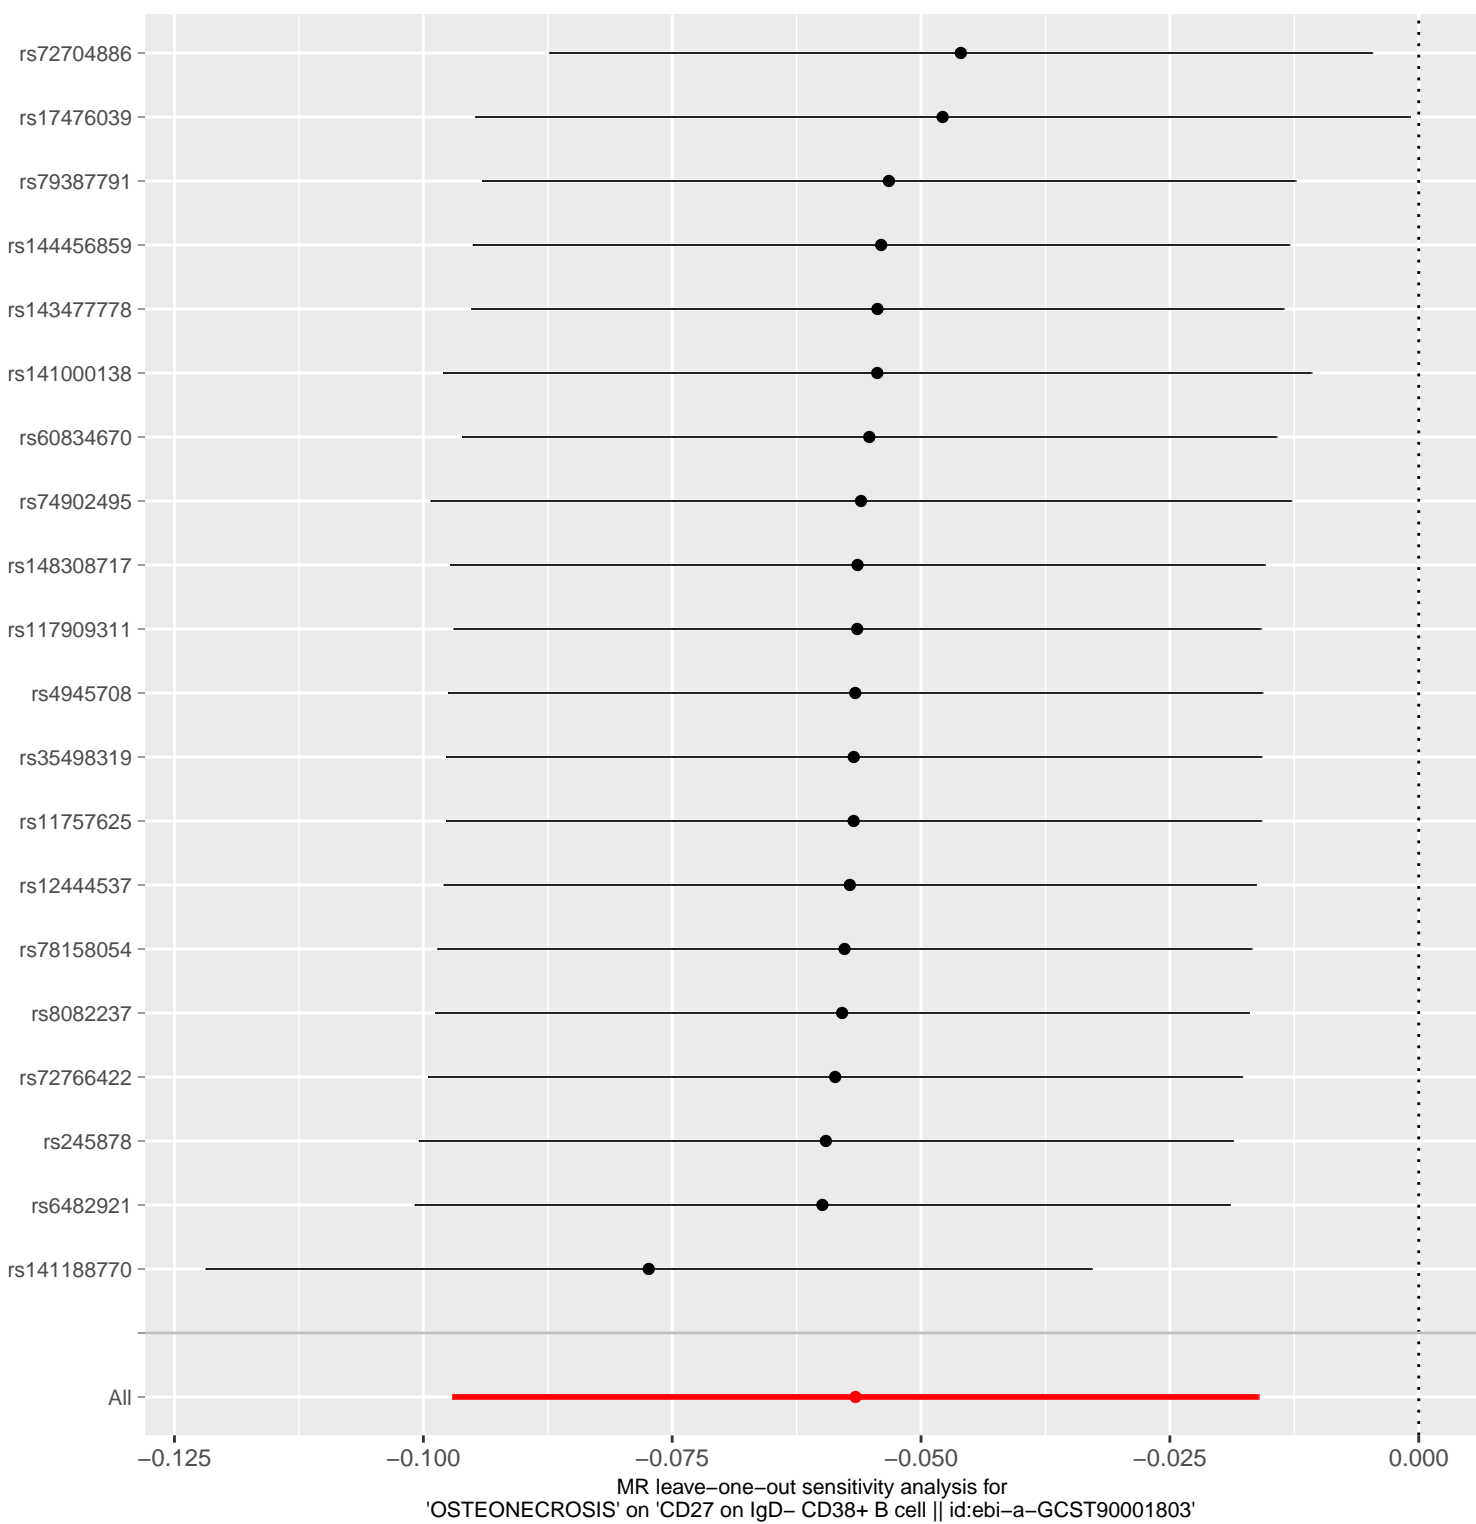

### MR Test

- Inverse variance weighted
- MR Egger
- Simple mode
- Weighted median
- Weighted mode

SNP effect on CD27 on IgD- CD38+ B cell || id:ebi-a-GCST90001803

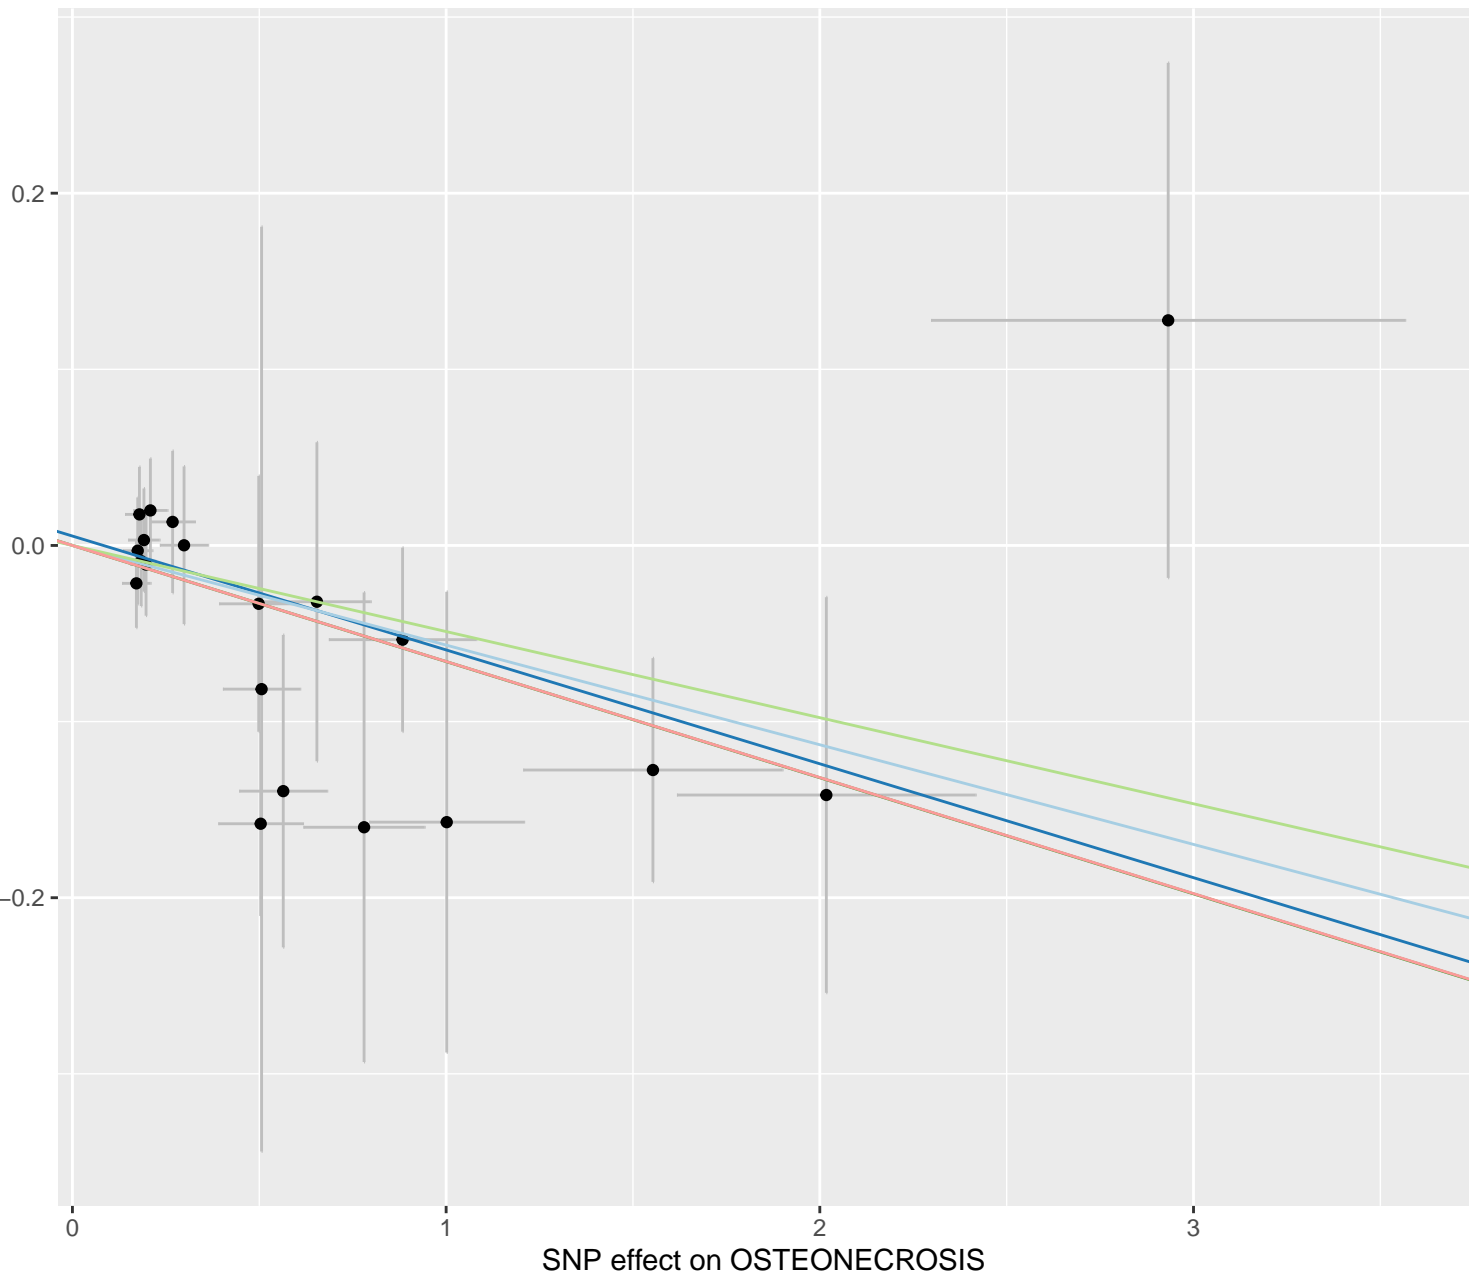

MR Method

- Inverse variance weighted
- MR Egger

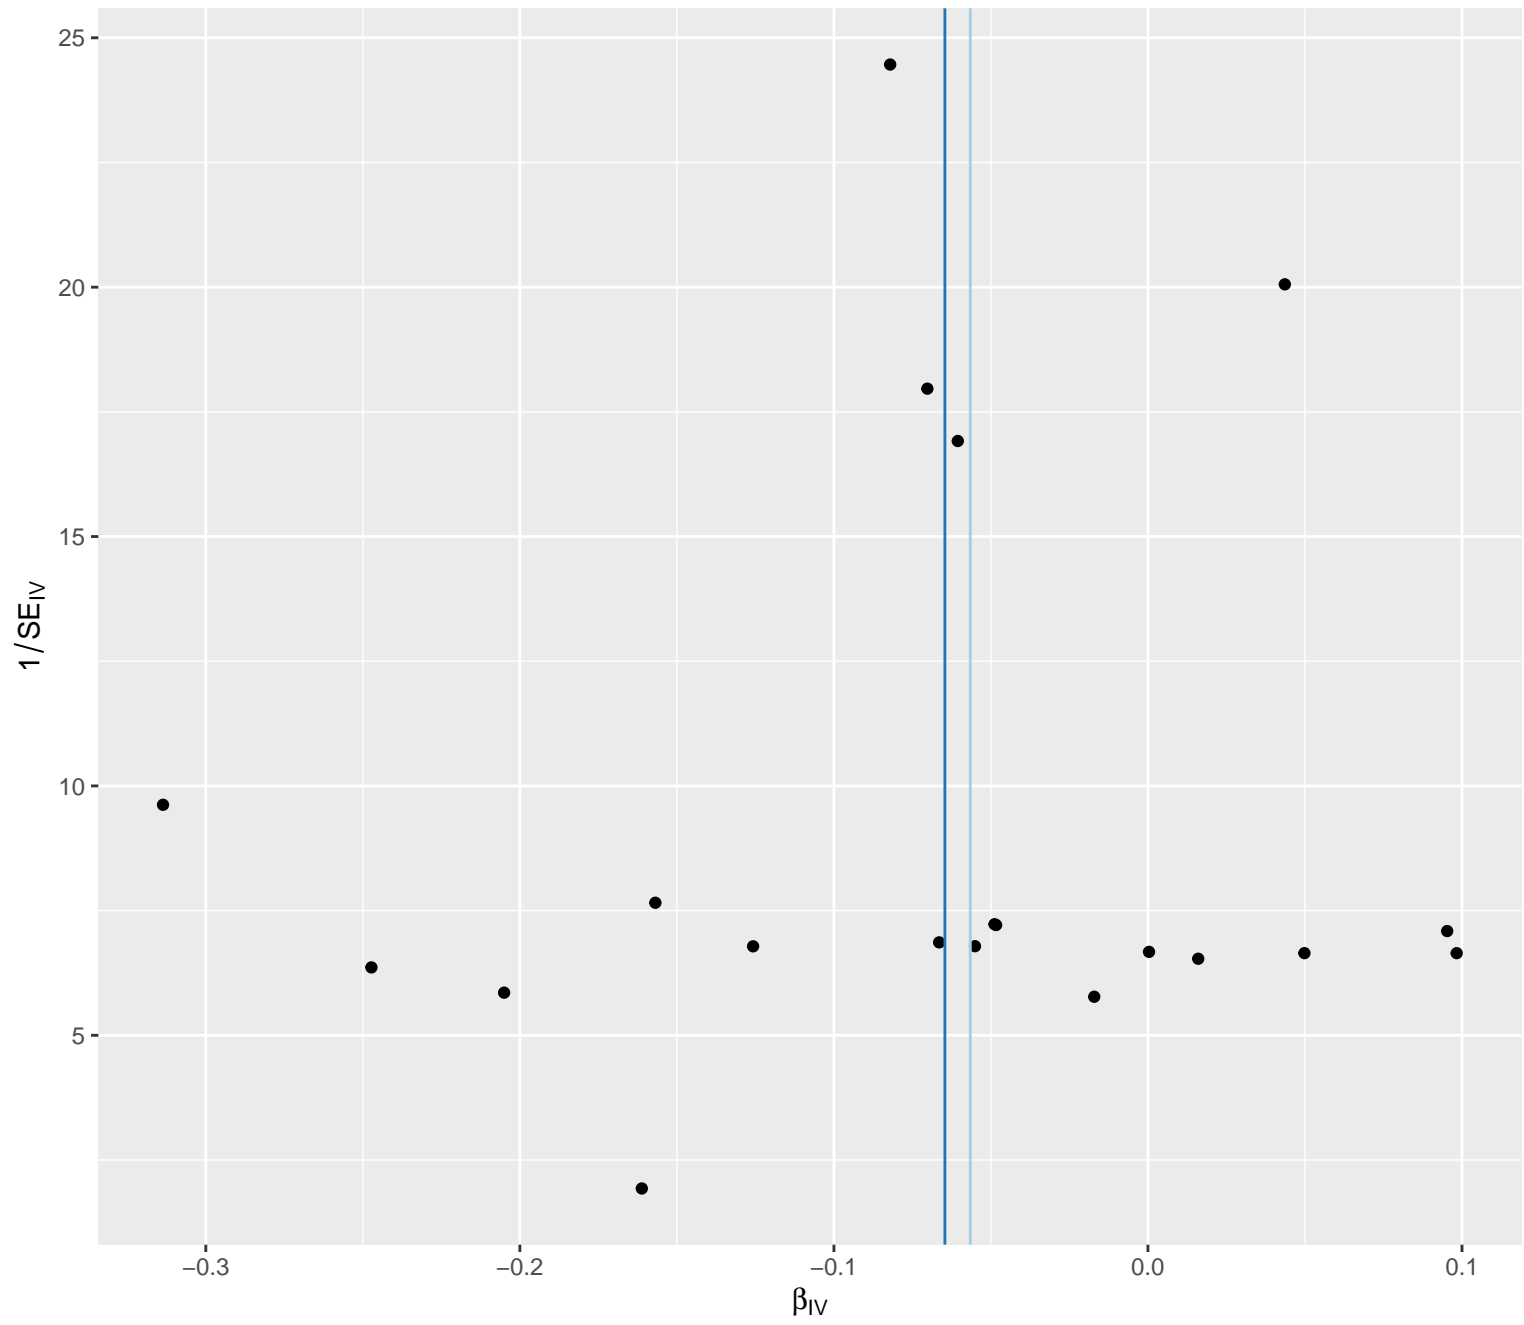

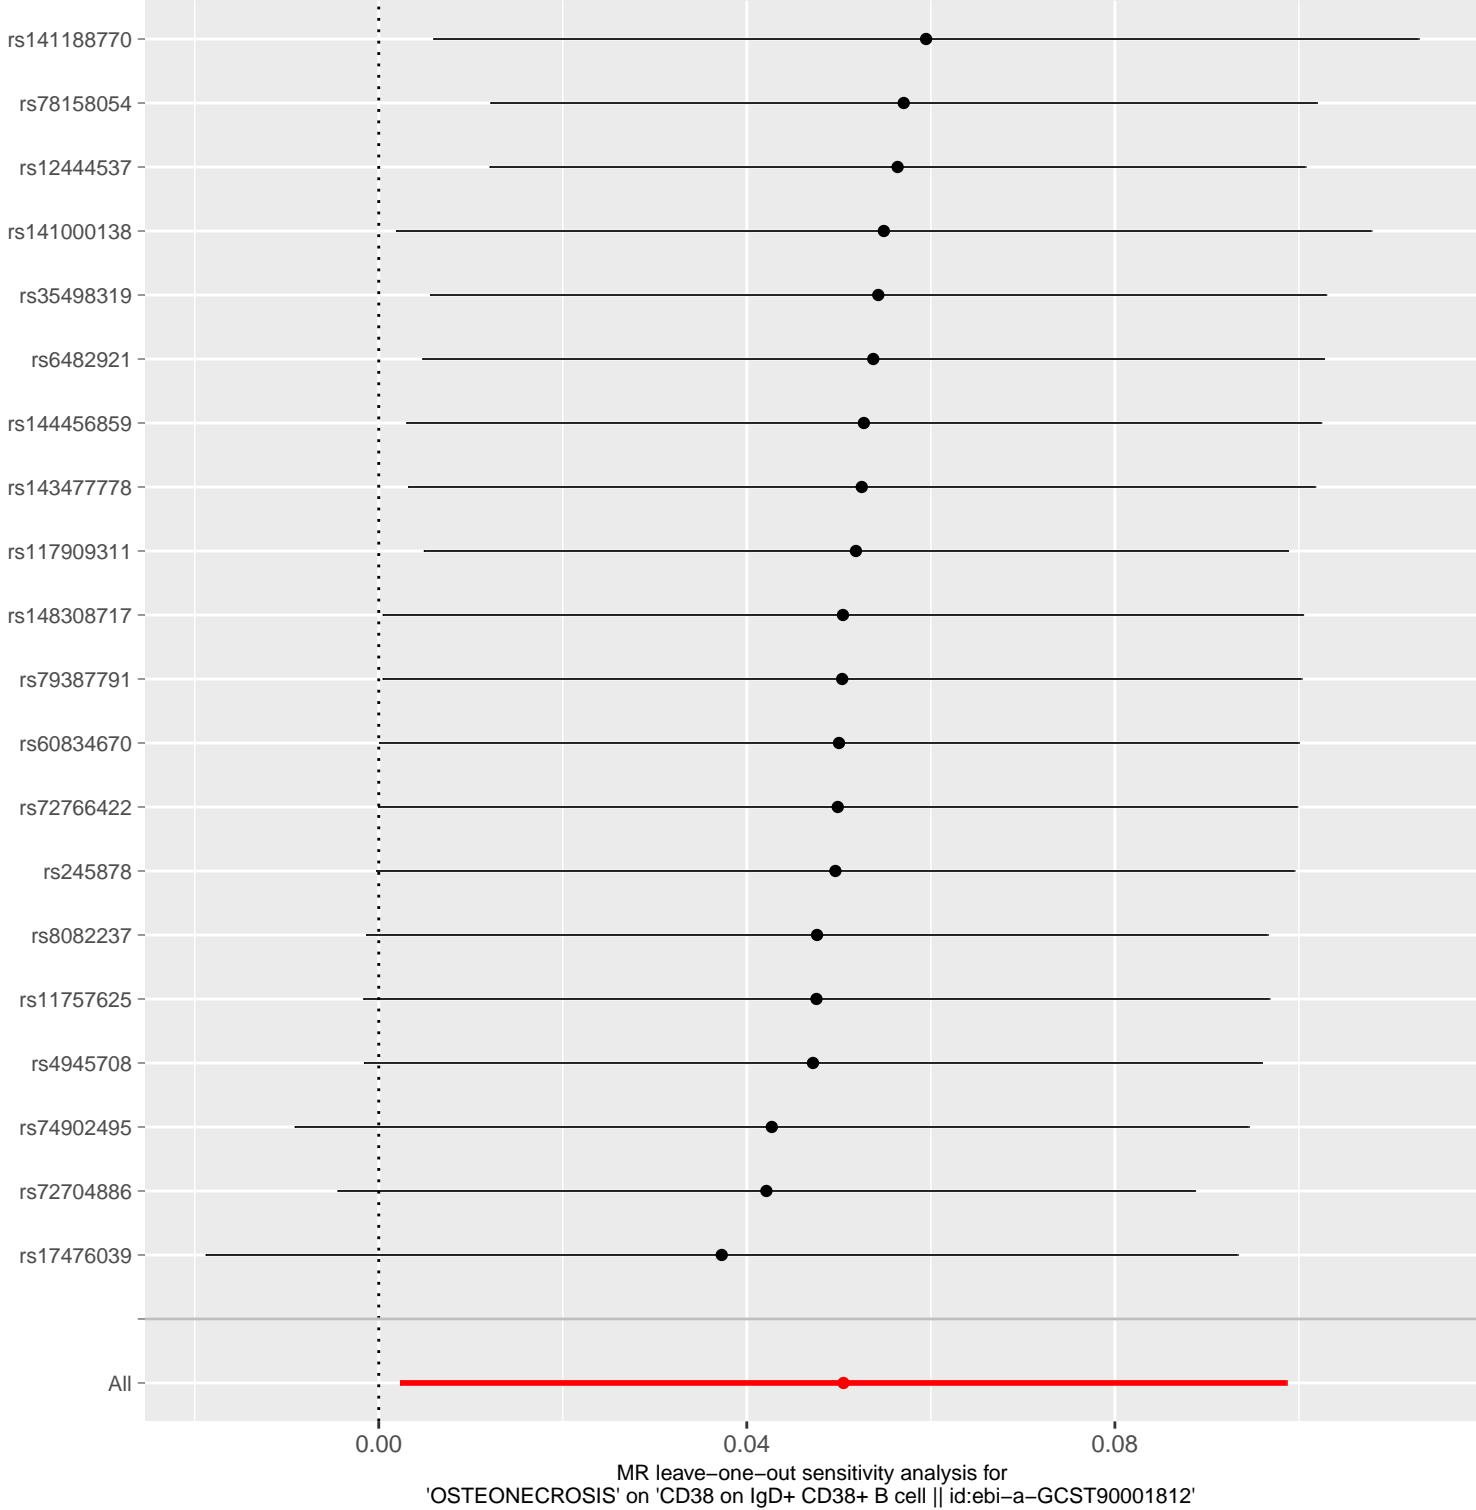

### MR Test

- Inverse variance weighted
- MR Egger
- Simple mode
- Weighted median
- Weighted mode

SNP effect on CD38 on IgD+ CD38+ B cell || id:ebi-a-GCST90001812

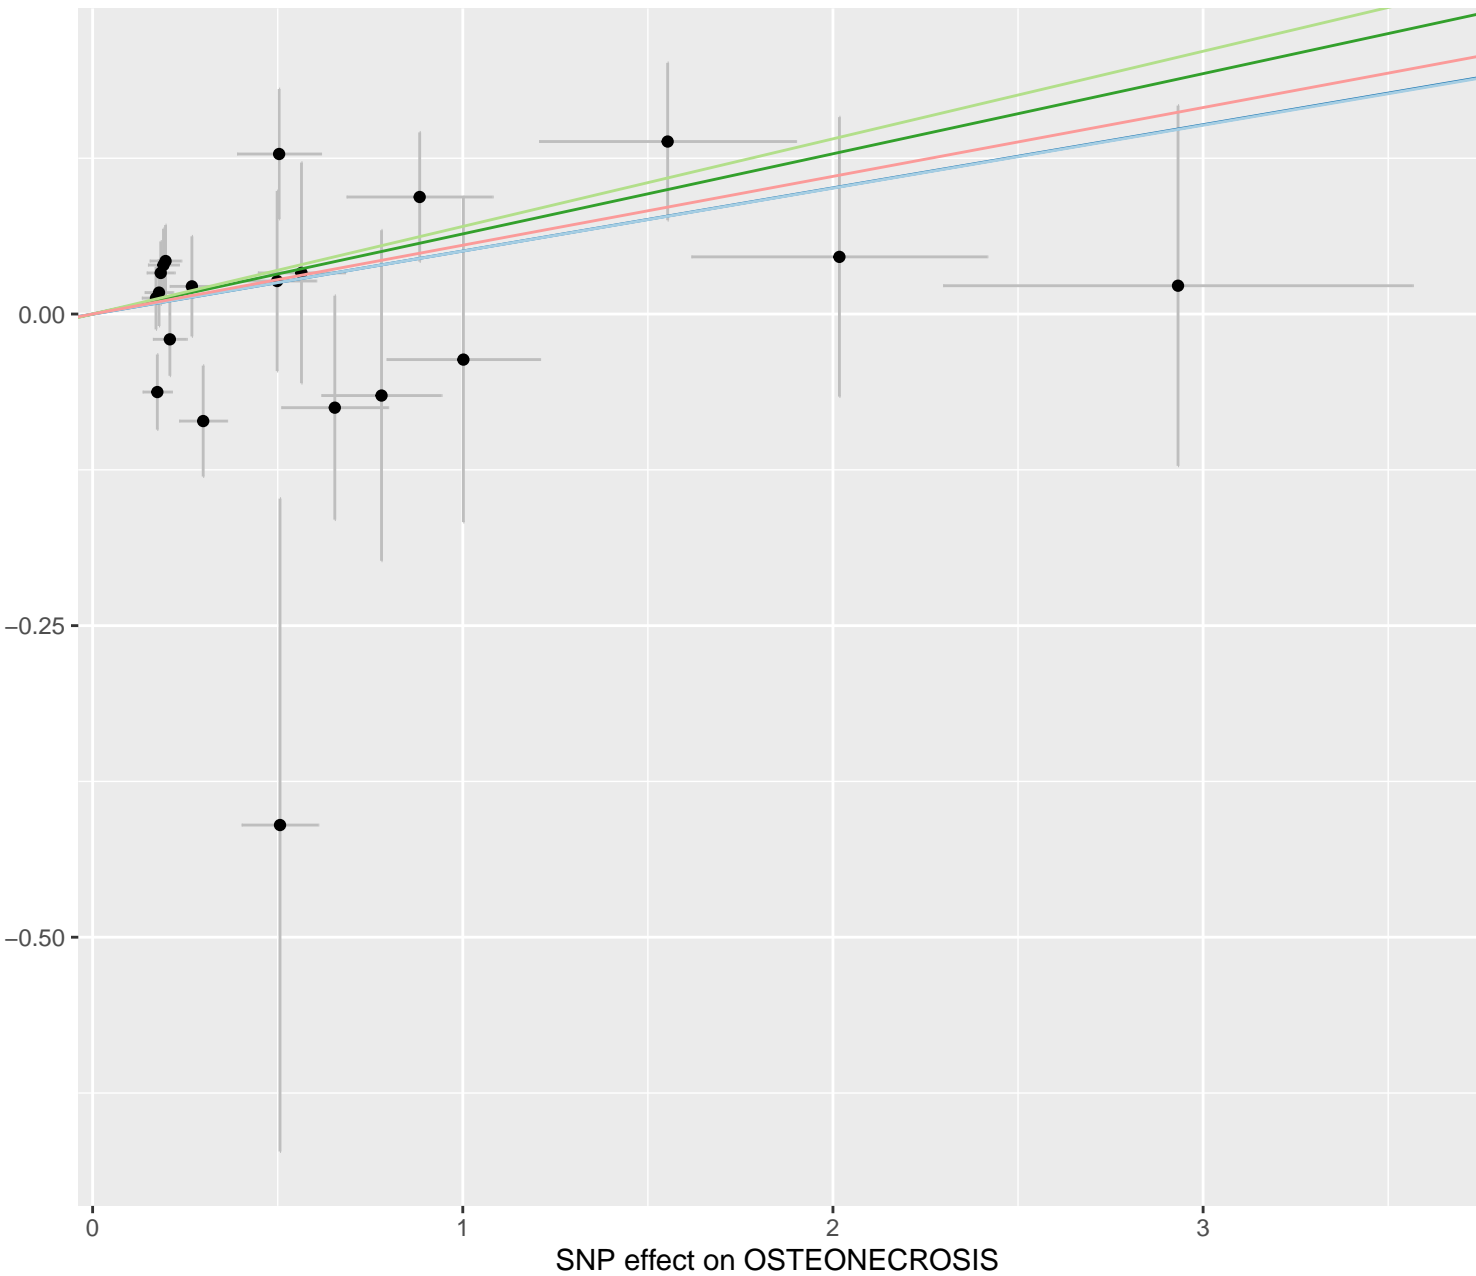

### MR Method

- Inverse variance weighted
- MR Egger

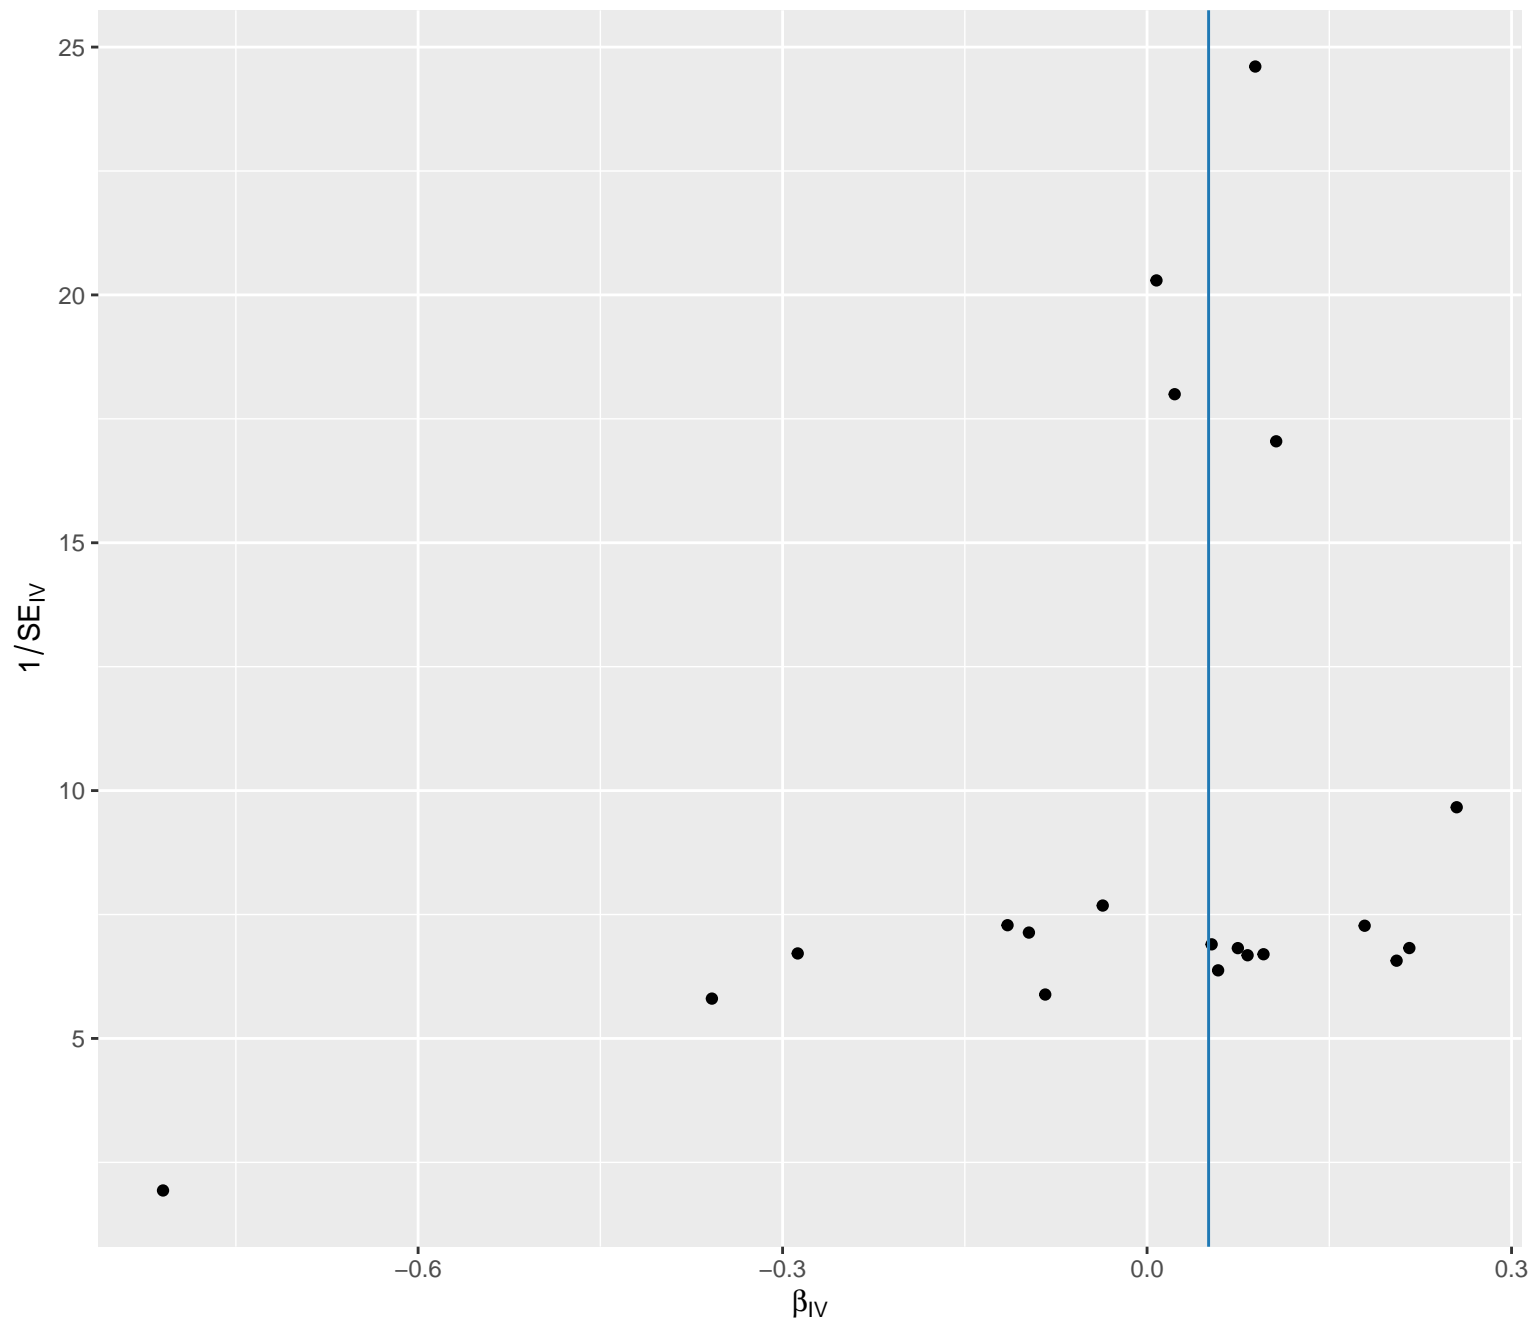

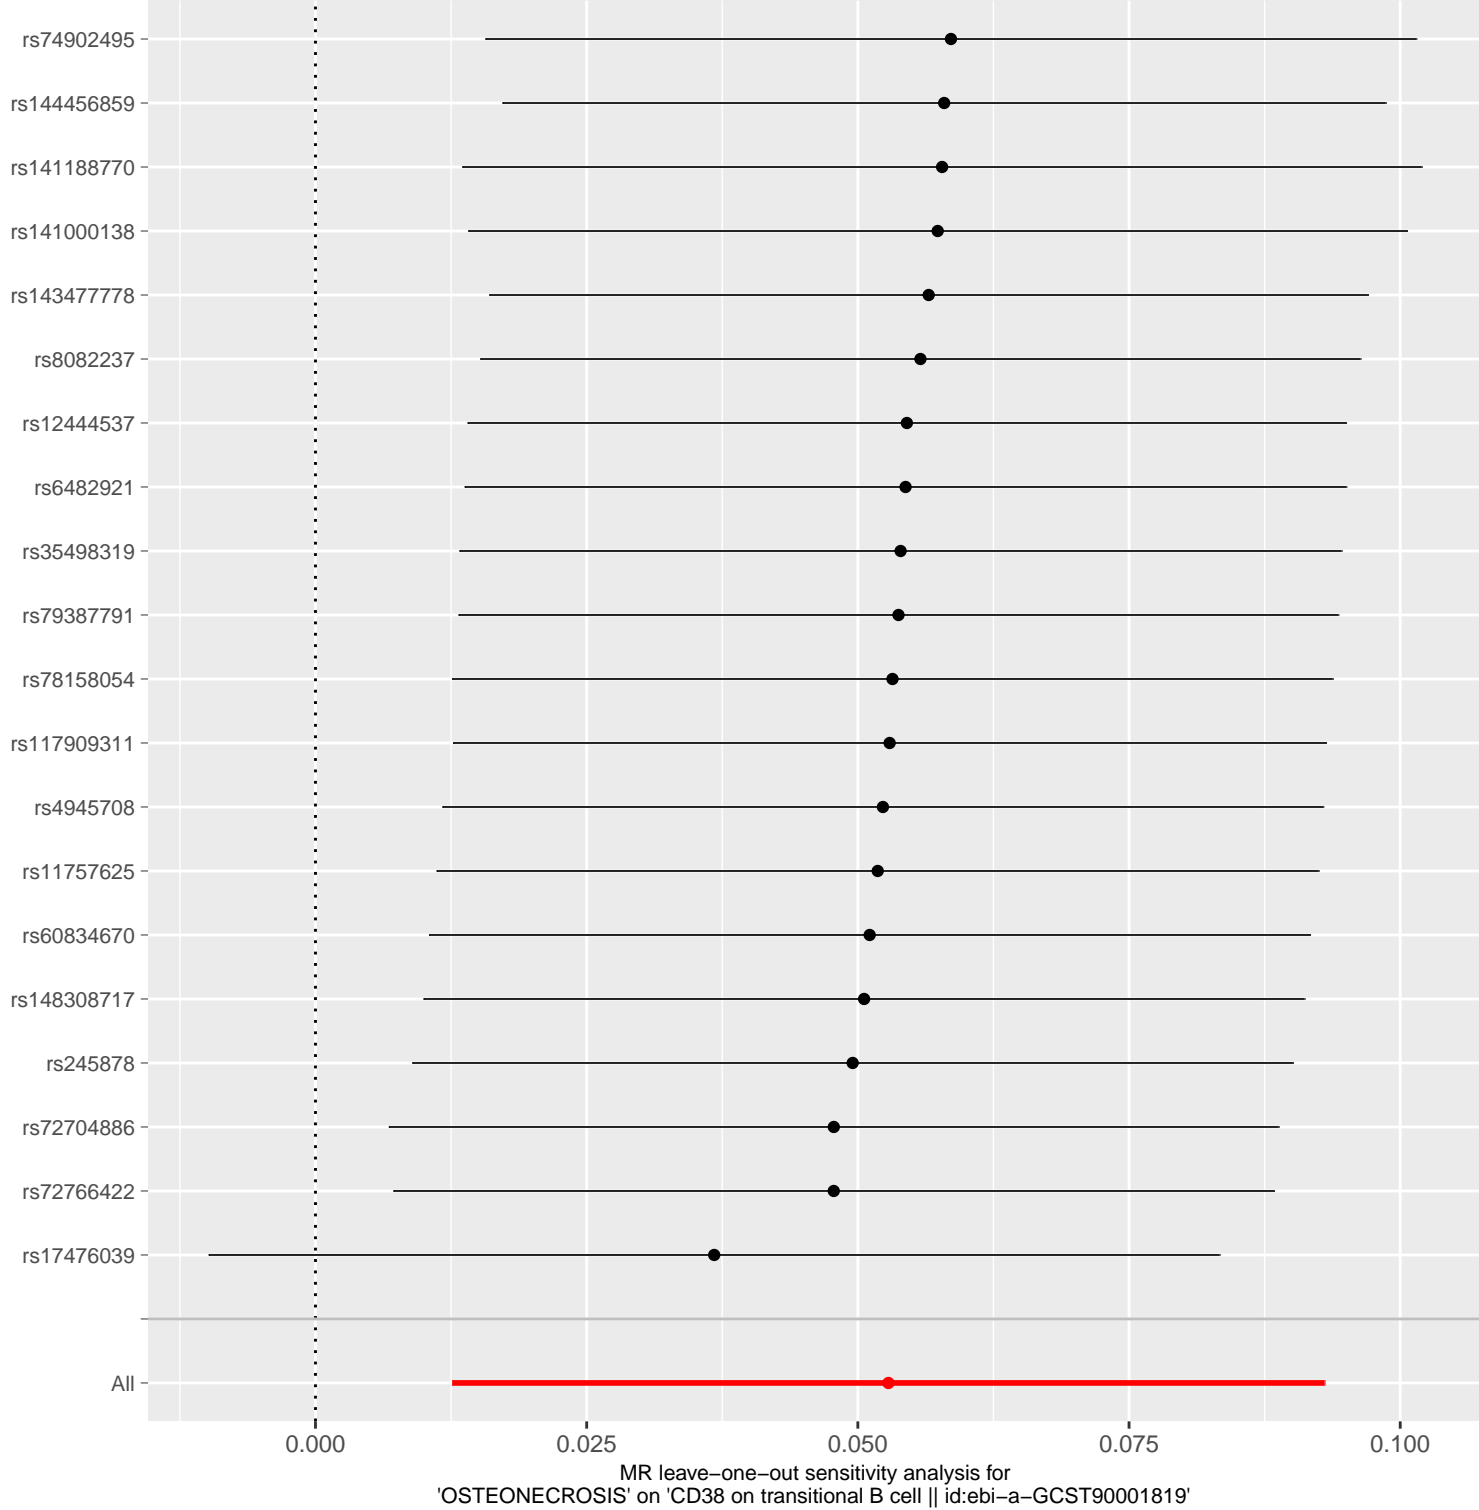

### MR Test

- Inverse variance weighted
- MR Egger
- Simple mode
- Weighted median
- Weighted mode

SNP effect on CD38 on transitional B cell || id:ebi-a-GCST90001819

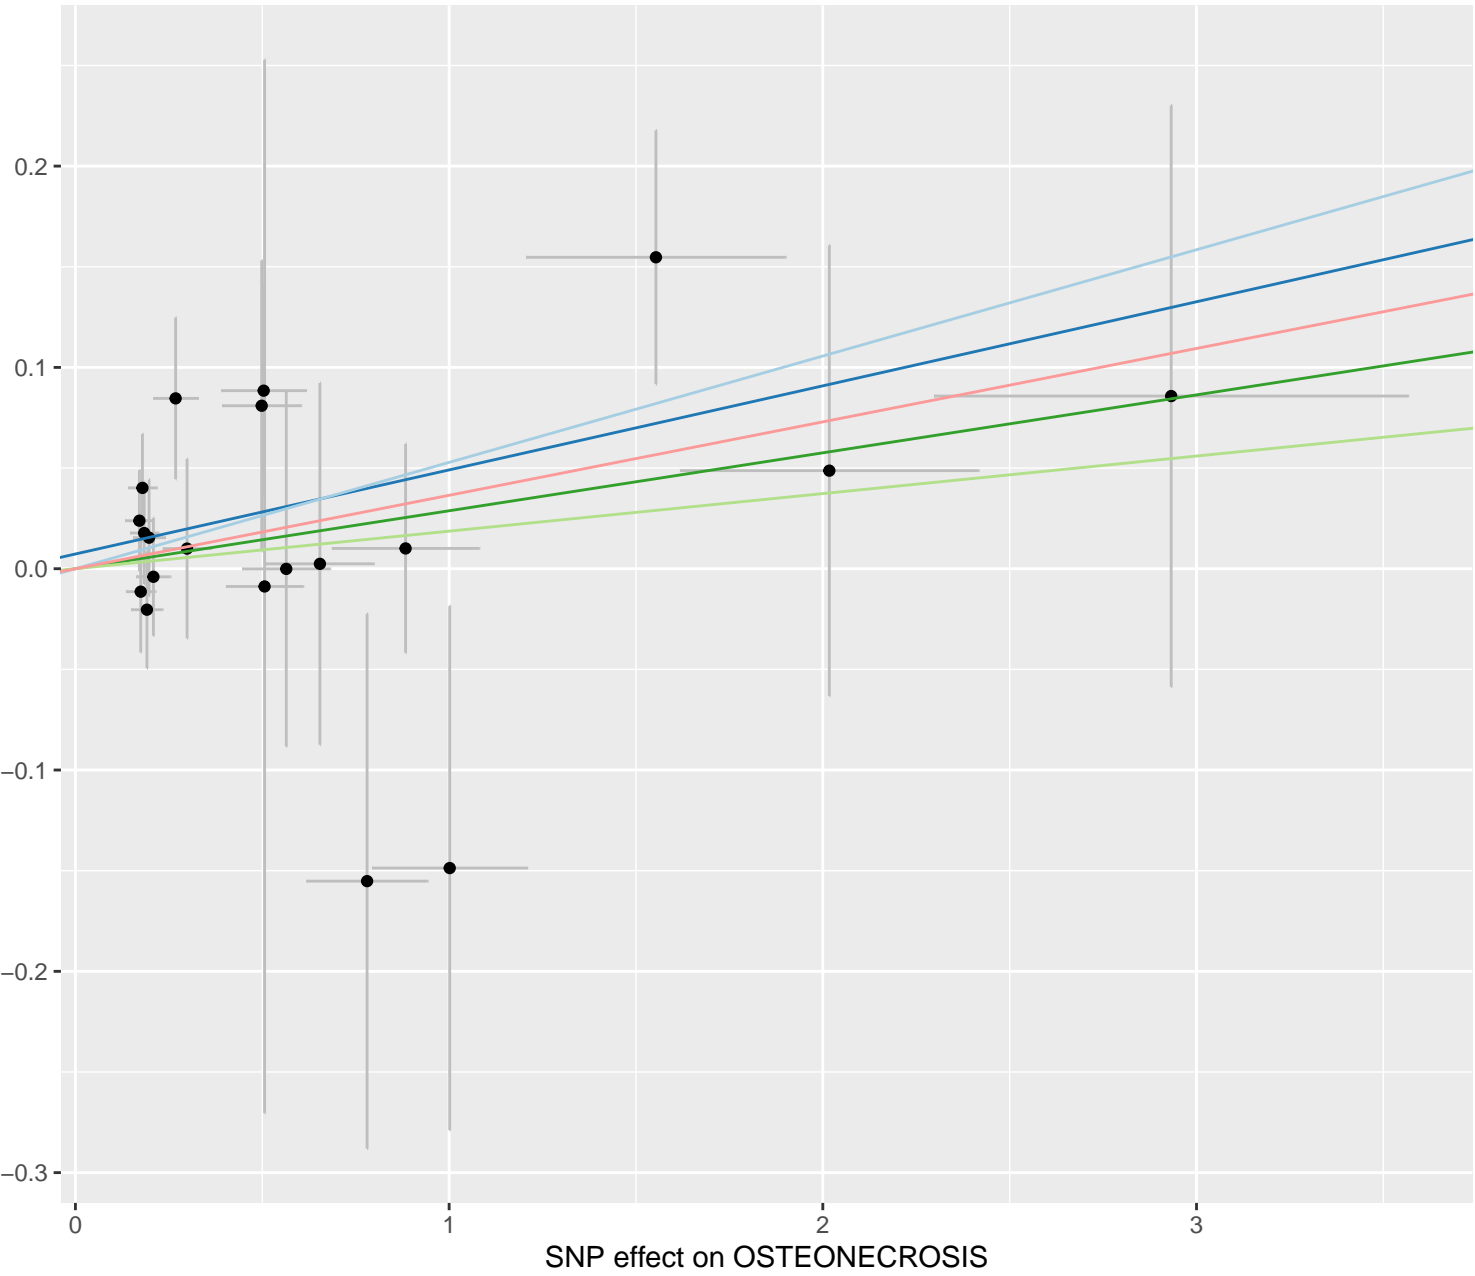



### MR Method

- Inverse variance weighted
- MR Egger

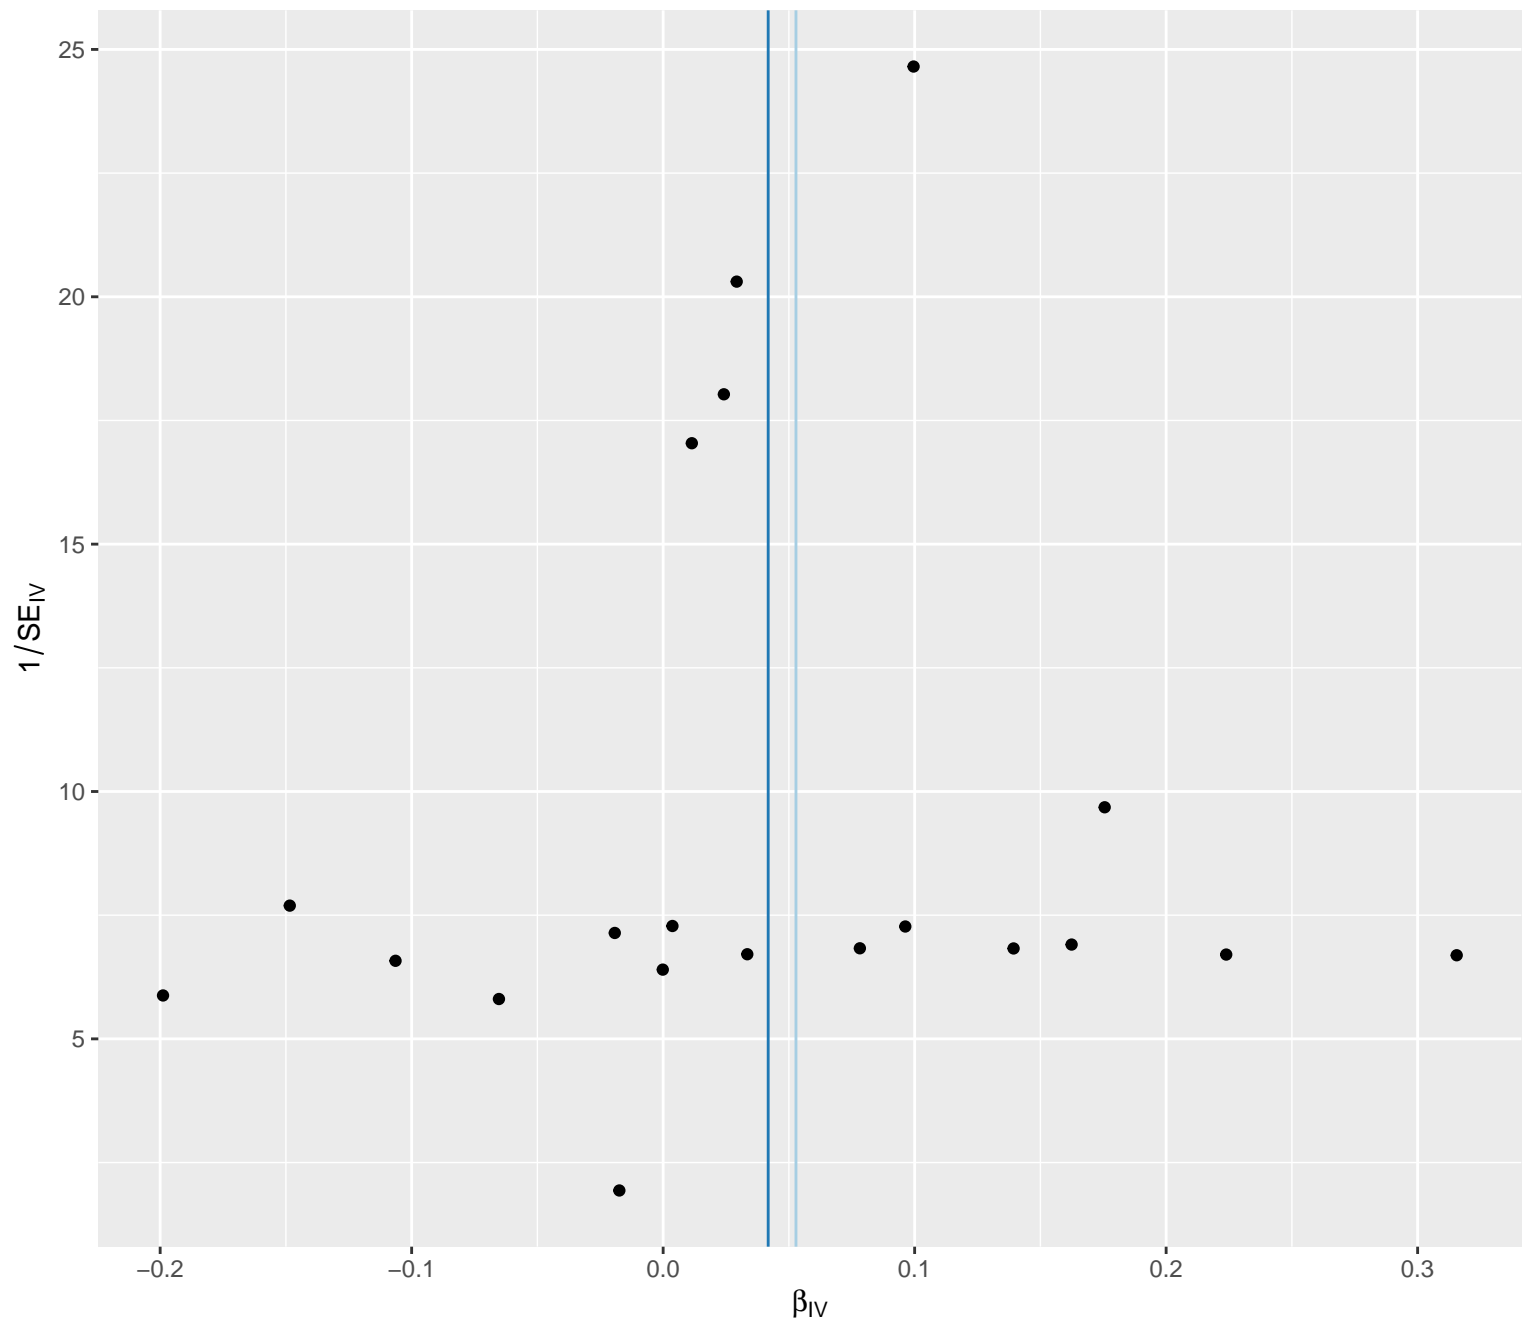

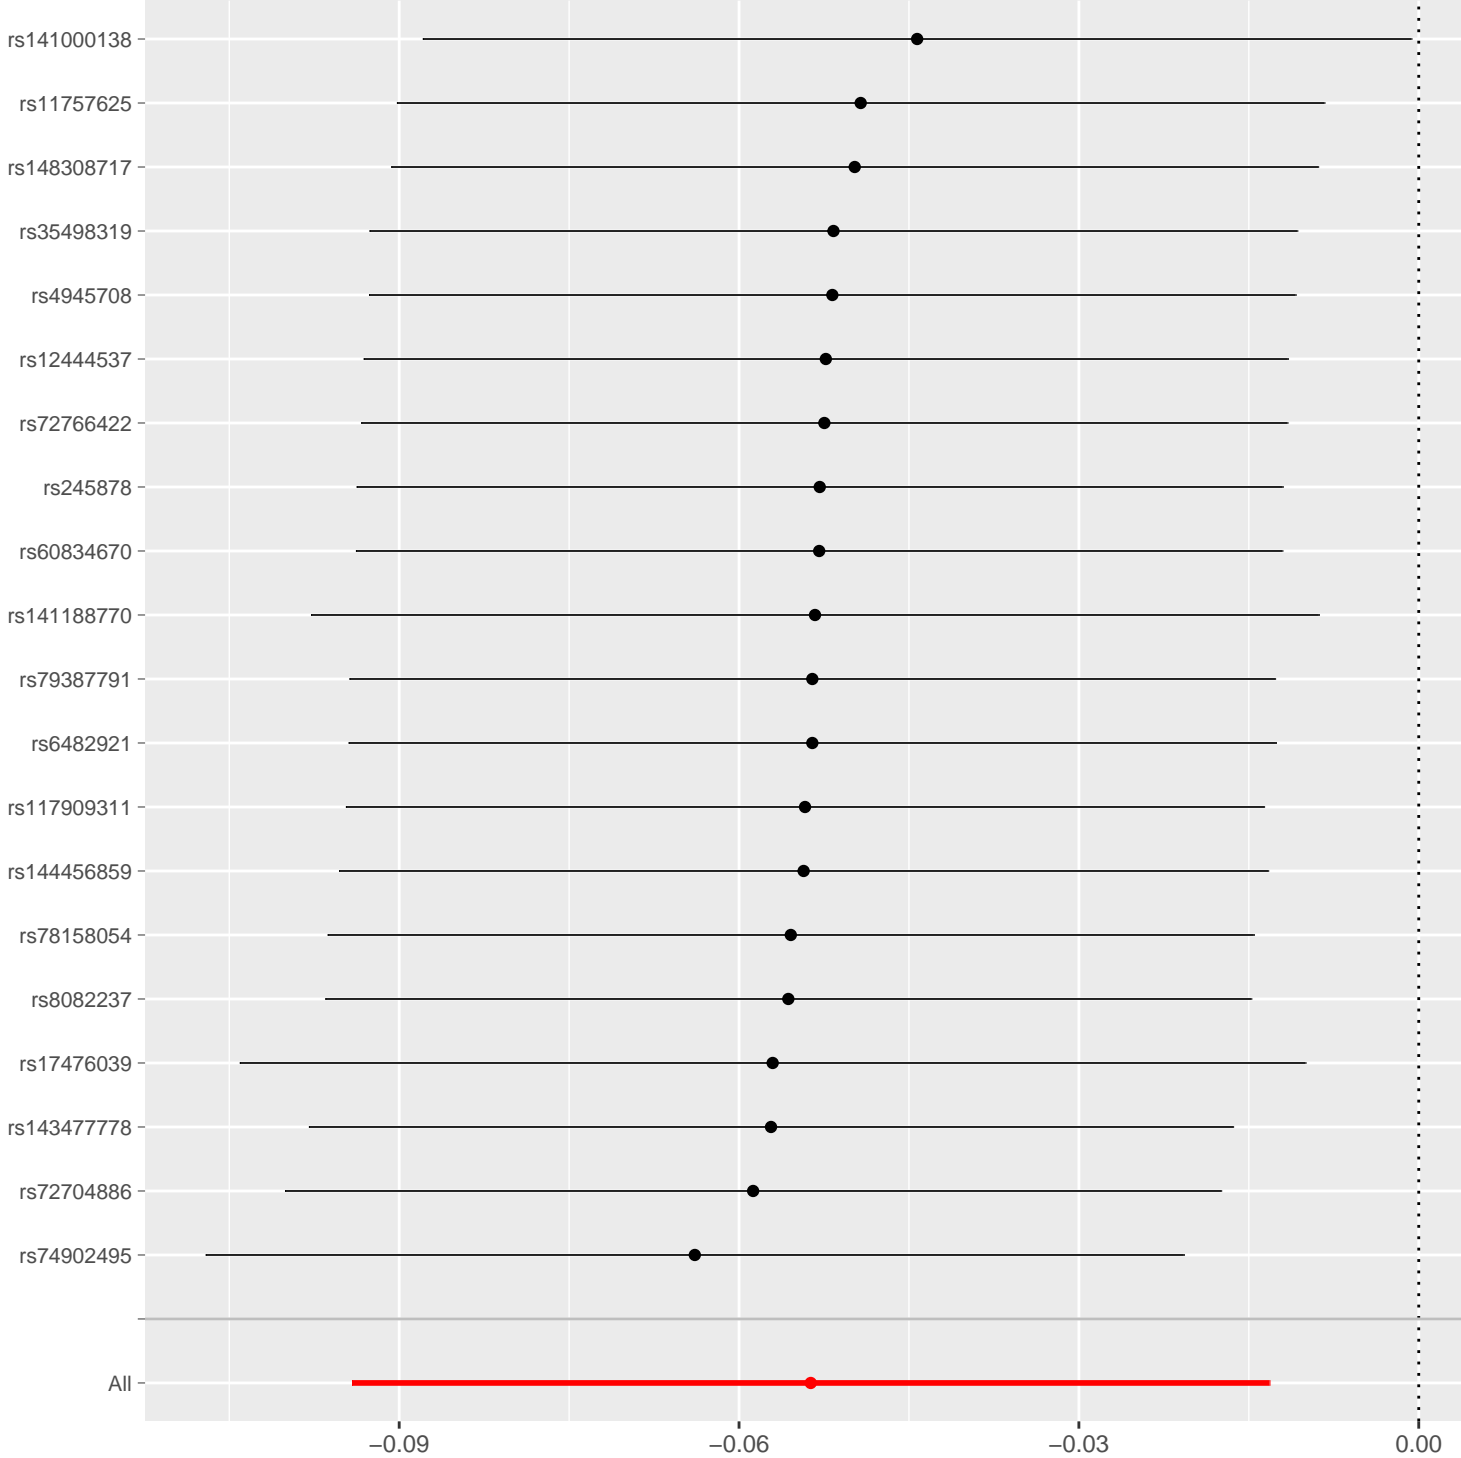

### MR Test

- Inverse variance weighted
- MR Egger
- Simple mode
- Weighted median
- Weighted mode

SNP effect on HLA DR on CD14- CD16- || id:ebi-a-GCST900002009

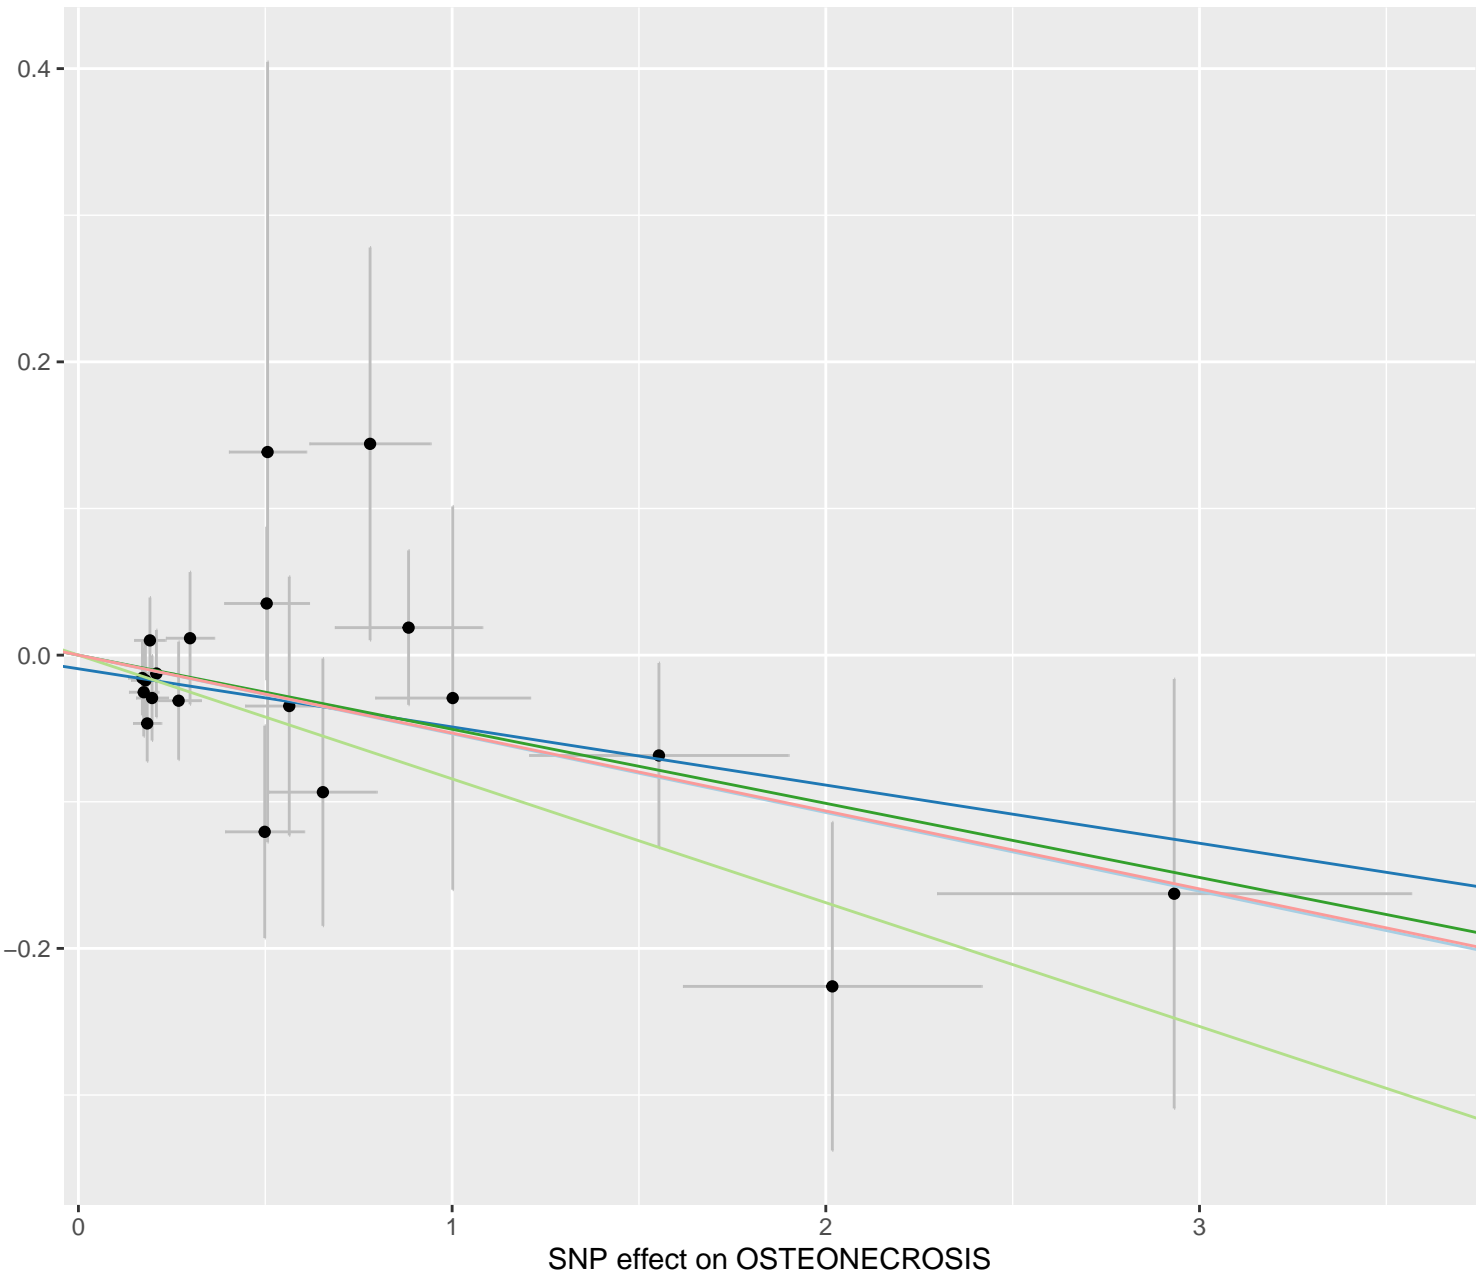

### MR Method

- Inverse variance weighted
- MR Egger

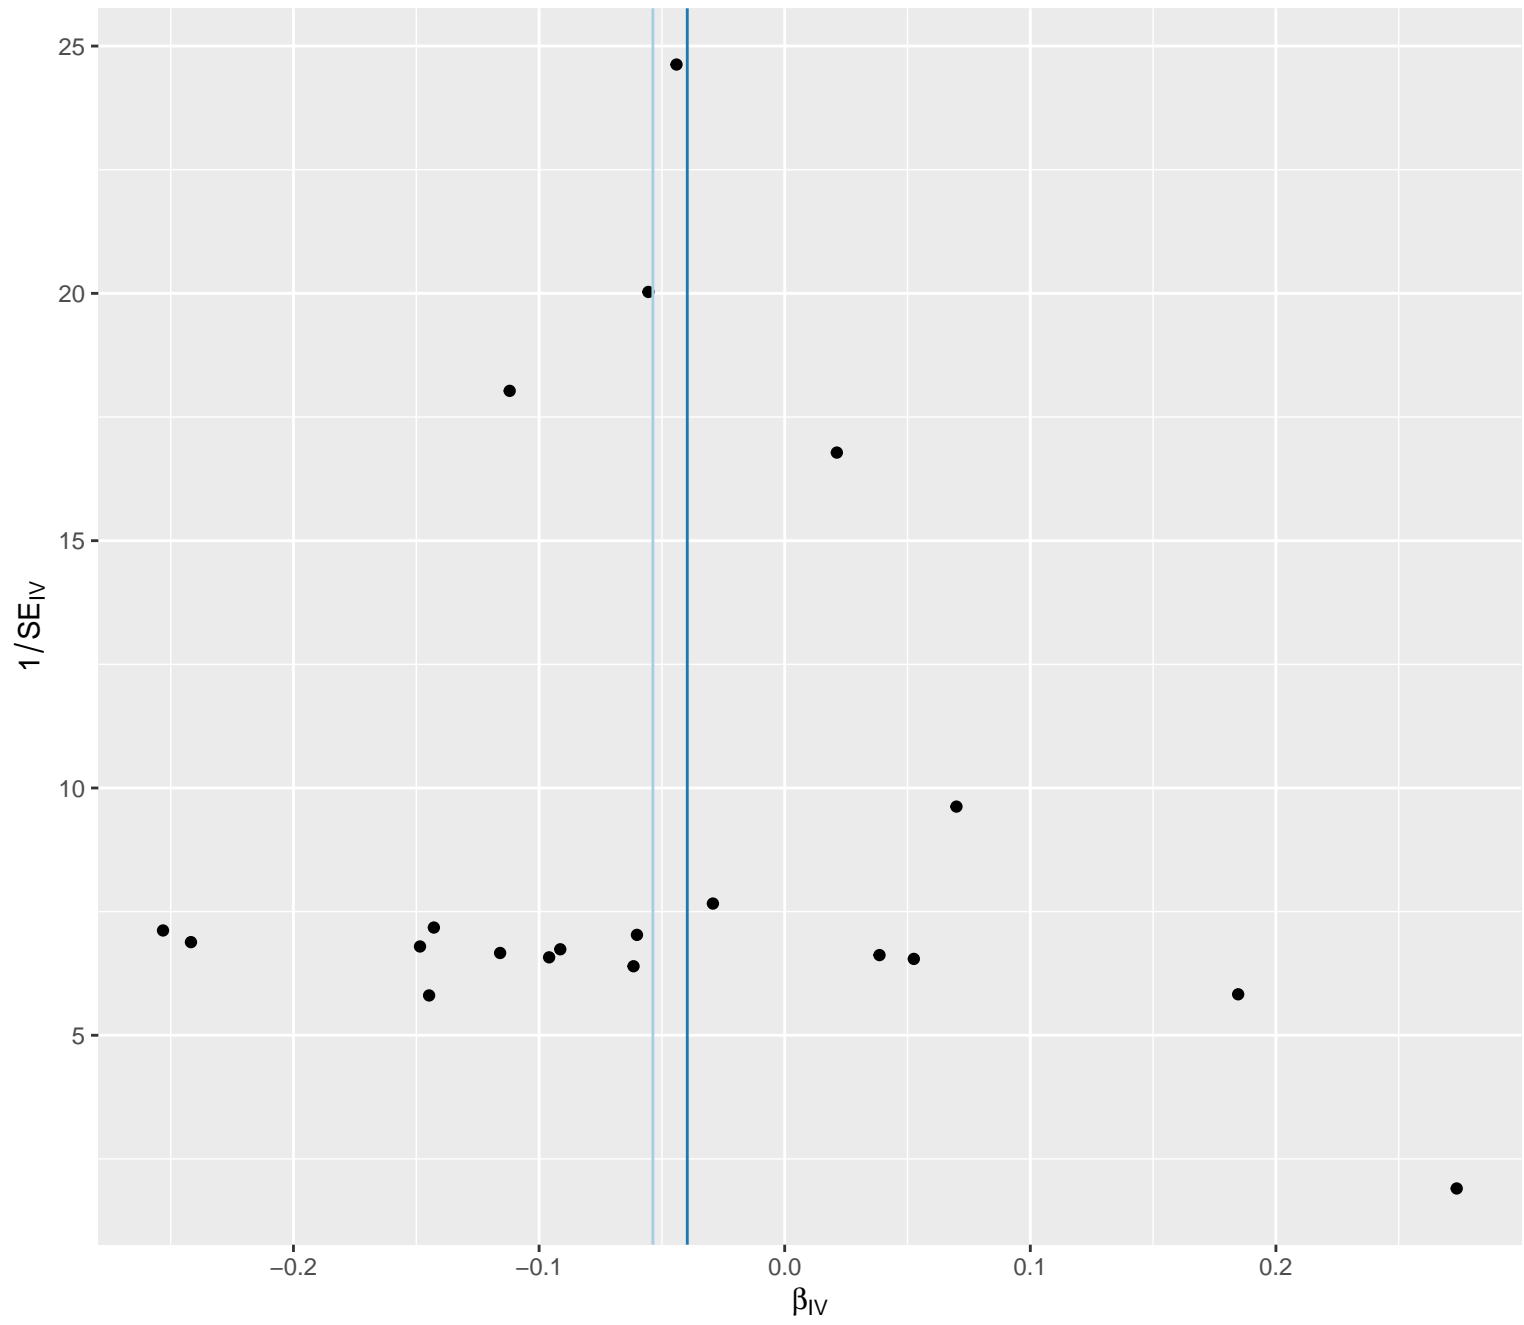

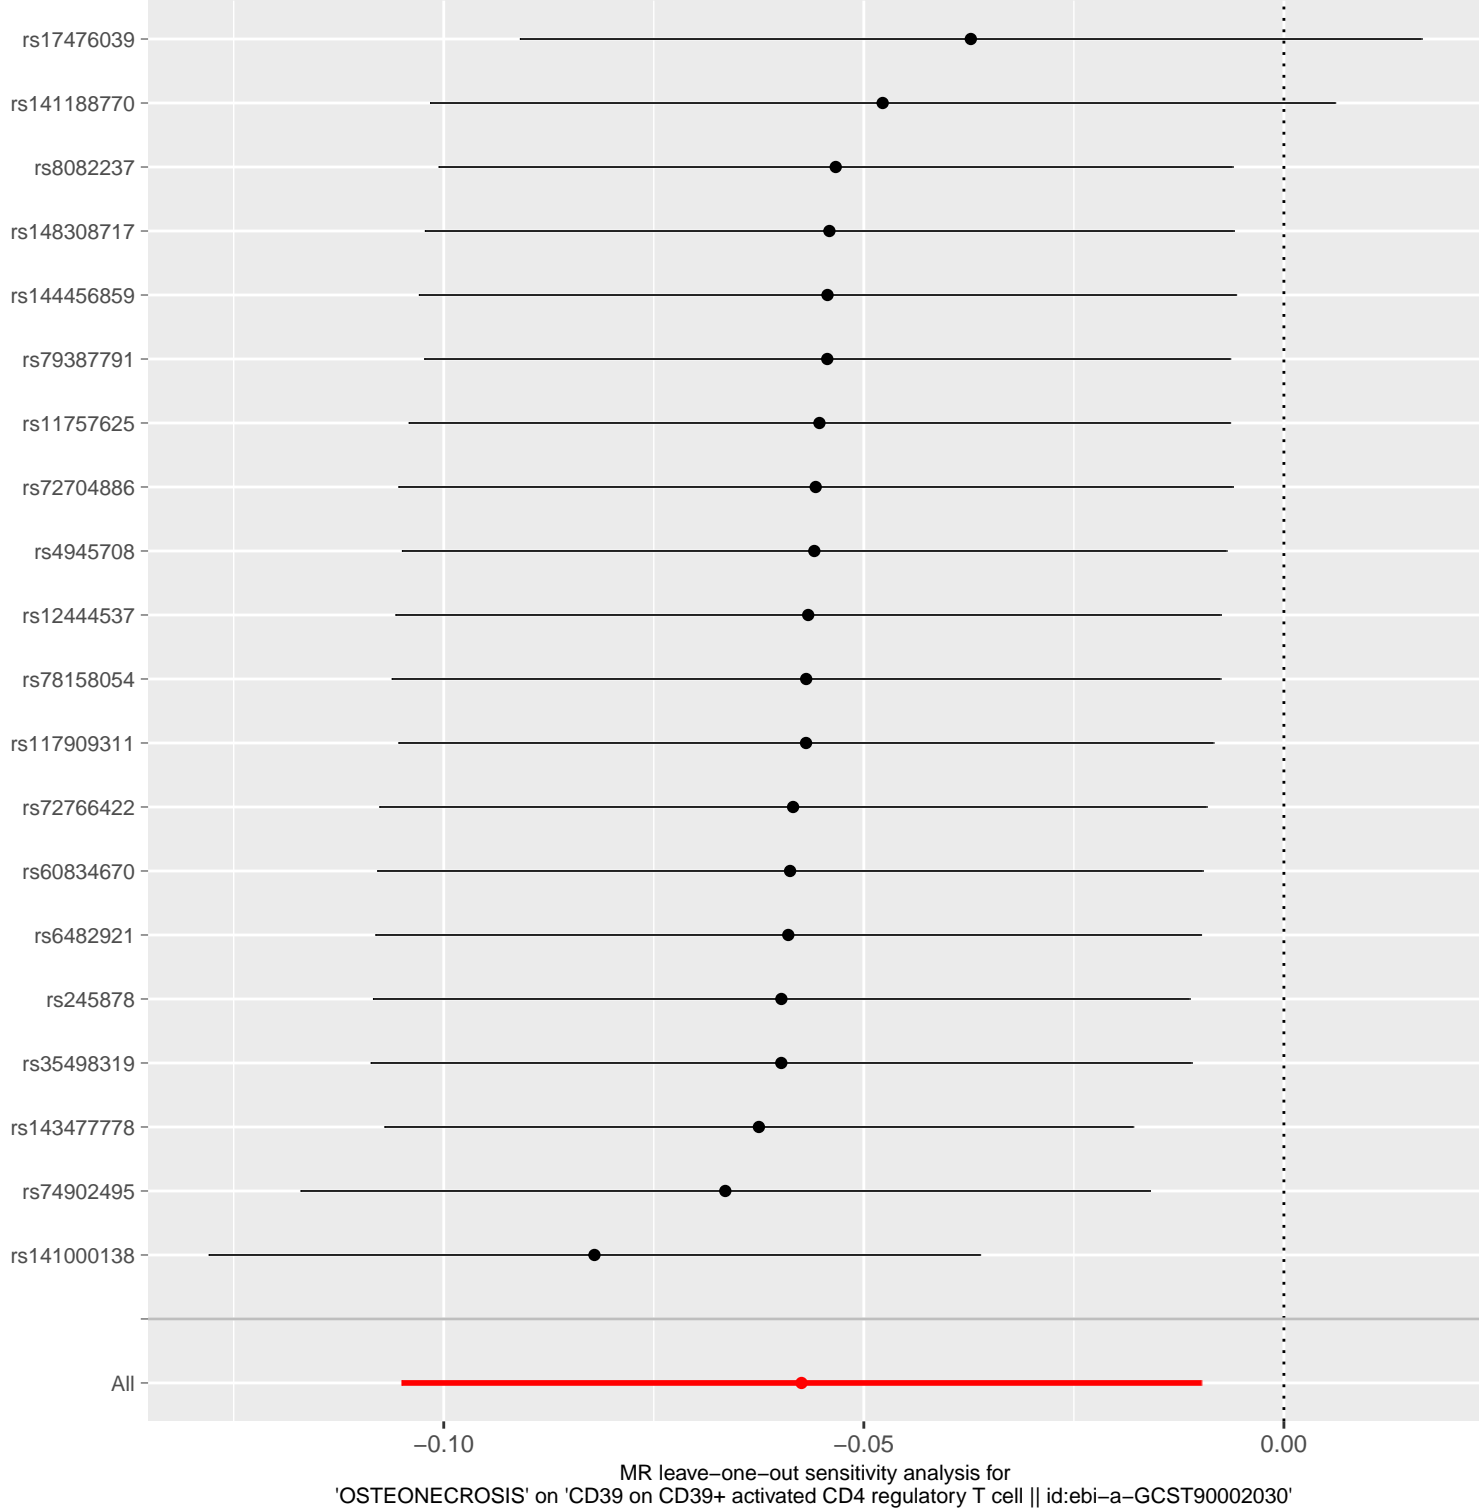

### MR Test

- Inverse variance weighted
- MR Egger
- Simple mode
- Weighted median
- Weighted mode

SNP effect on CD39+ activated CD4 regulatory T cell || id:ebi-a-GCST90002030

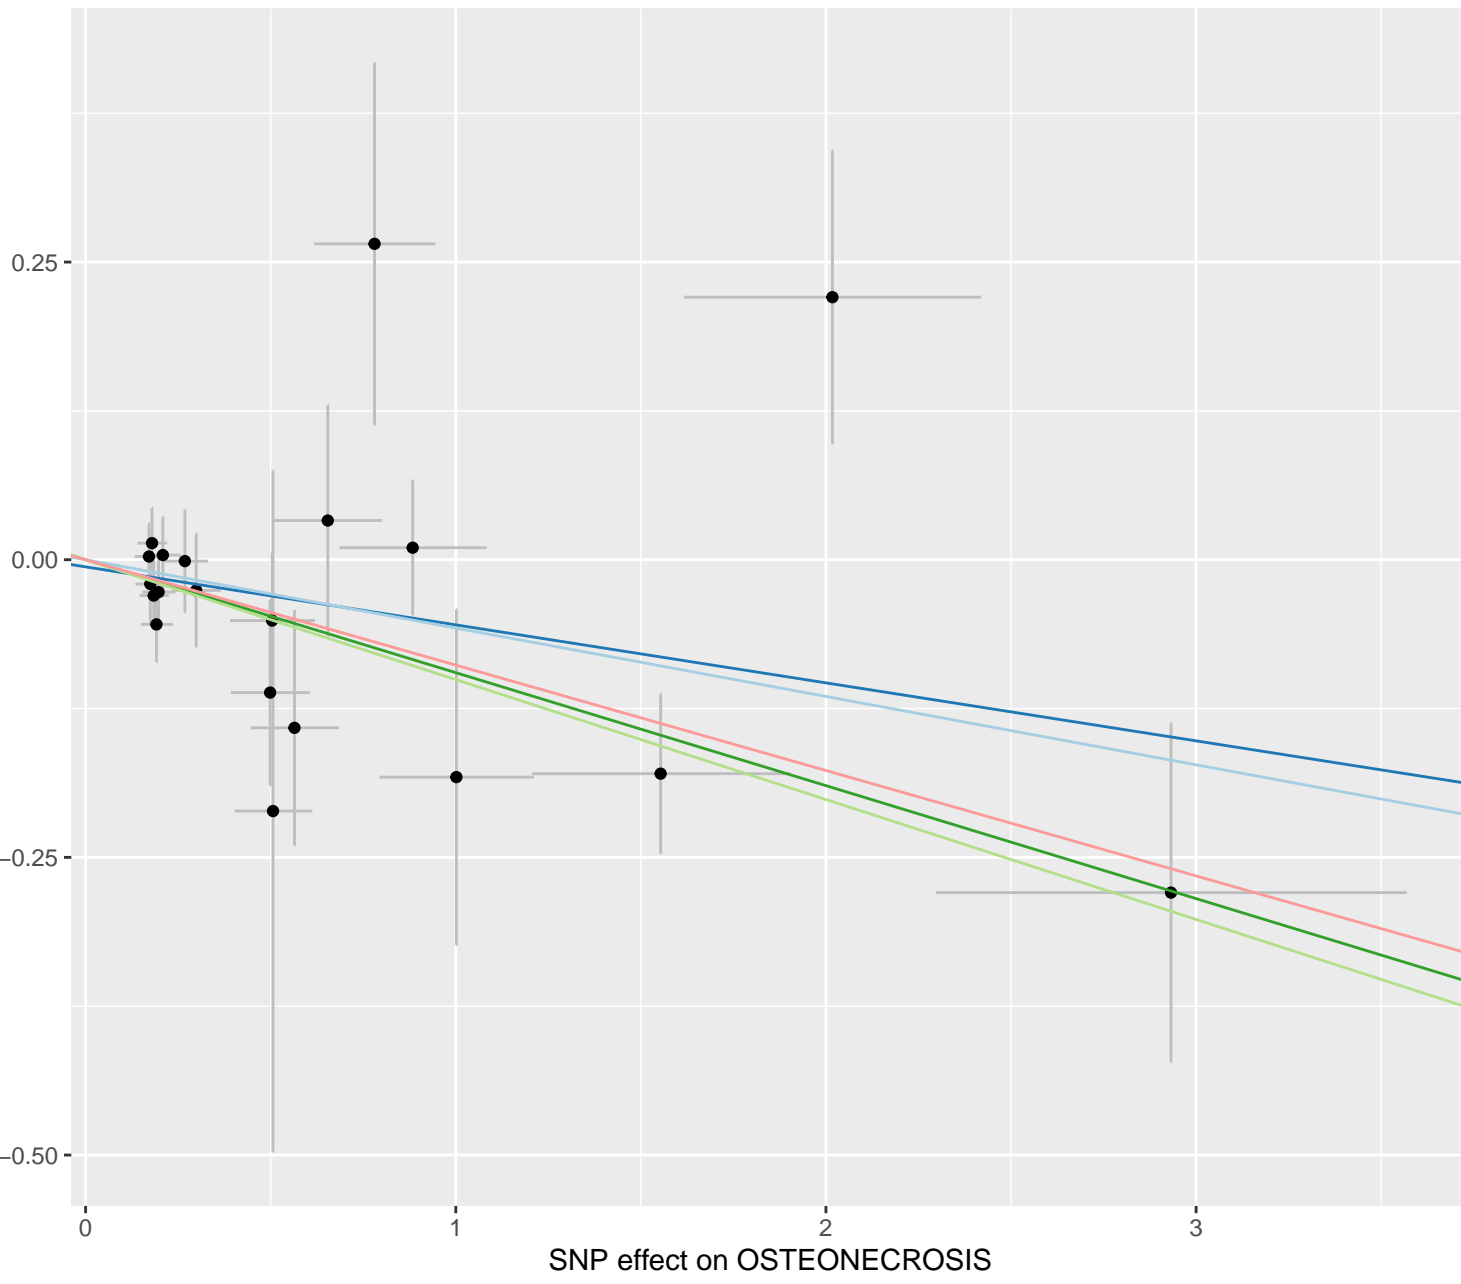

MR Method

- Inverse variance weighted
- MR Egger

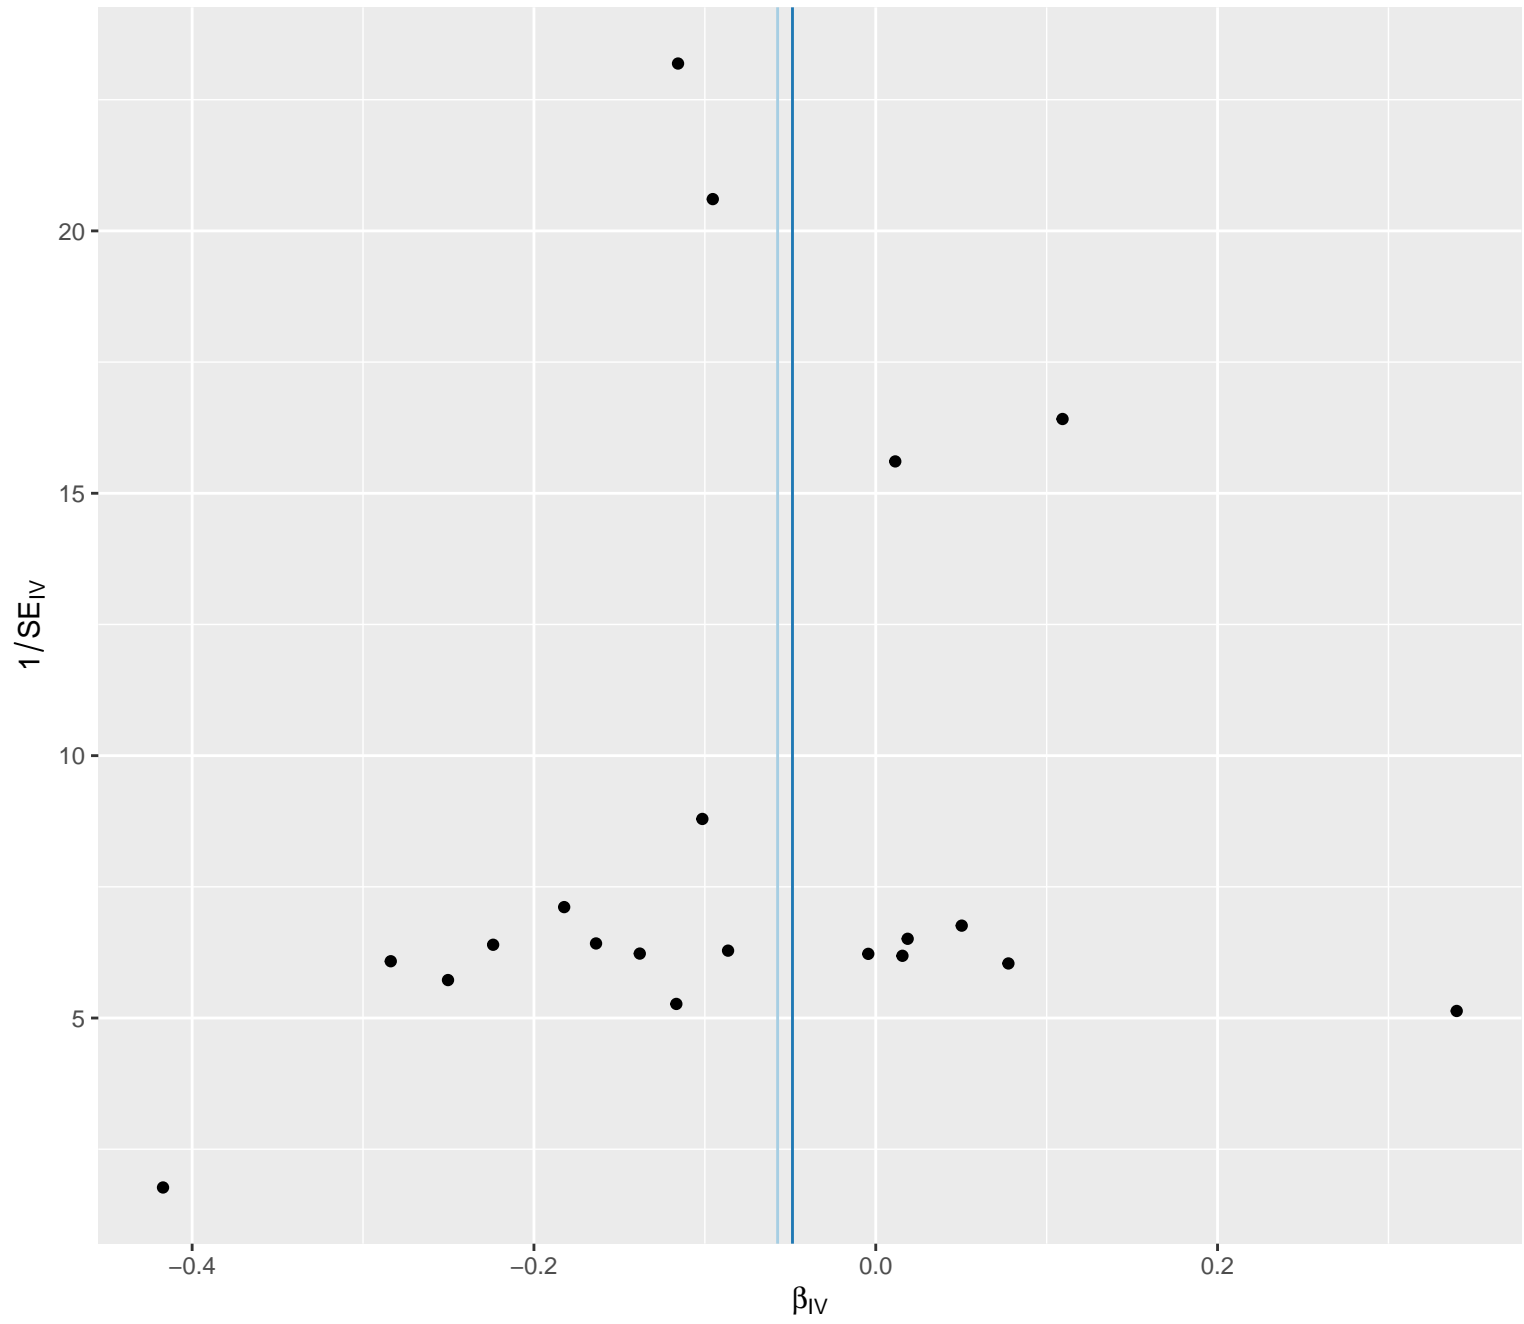

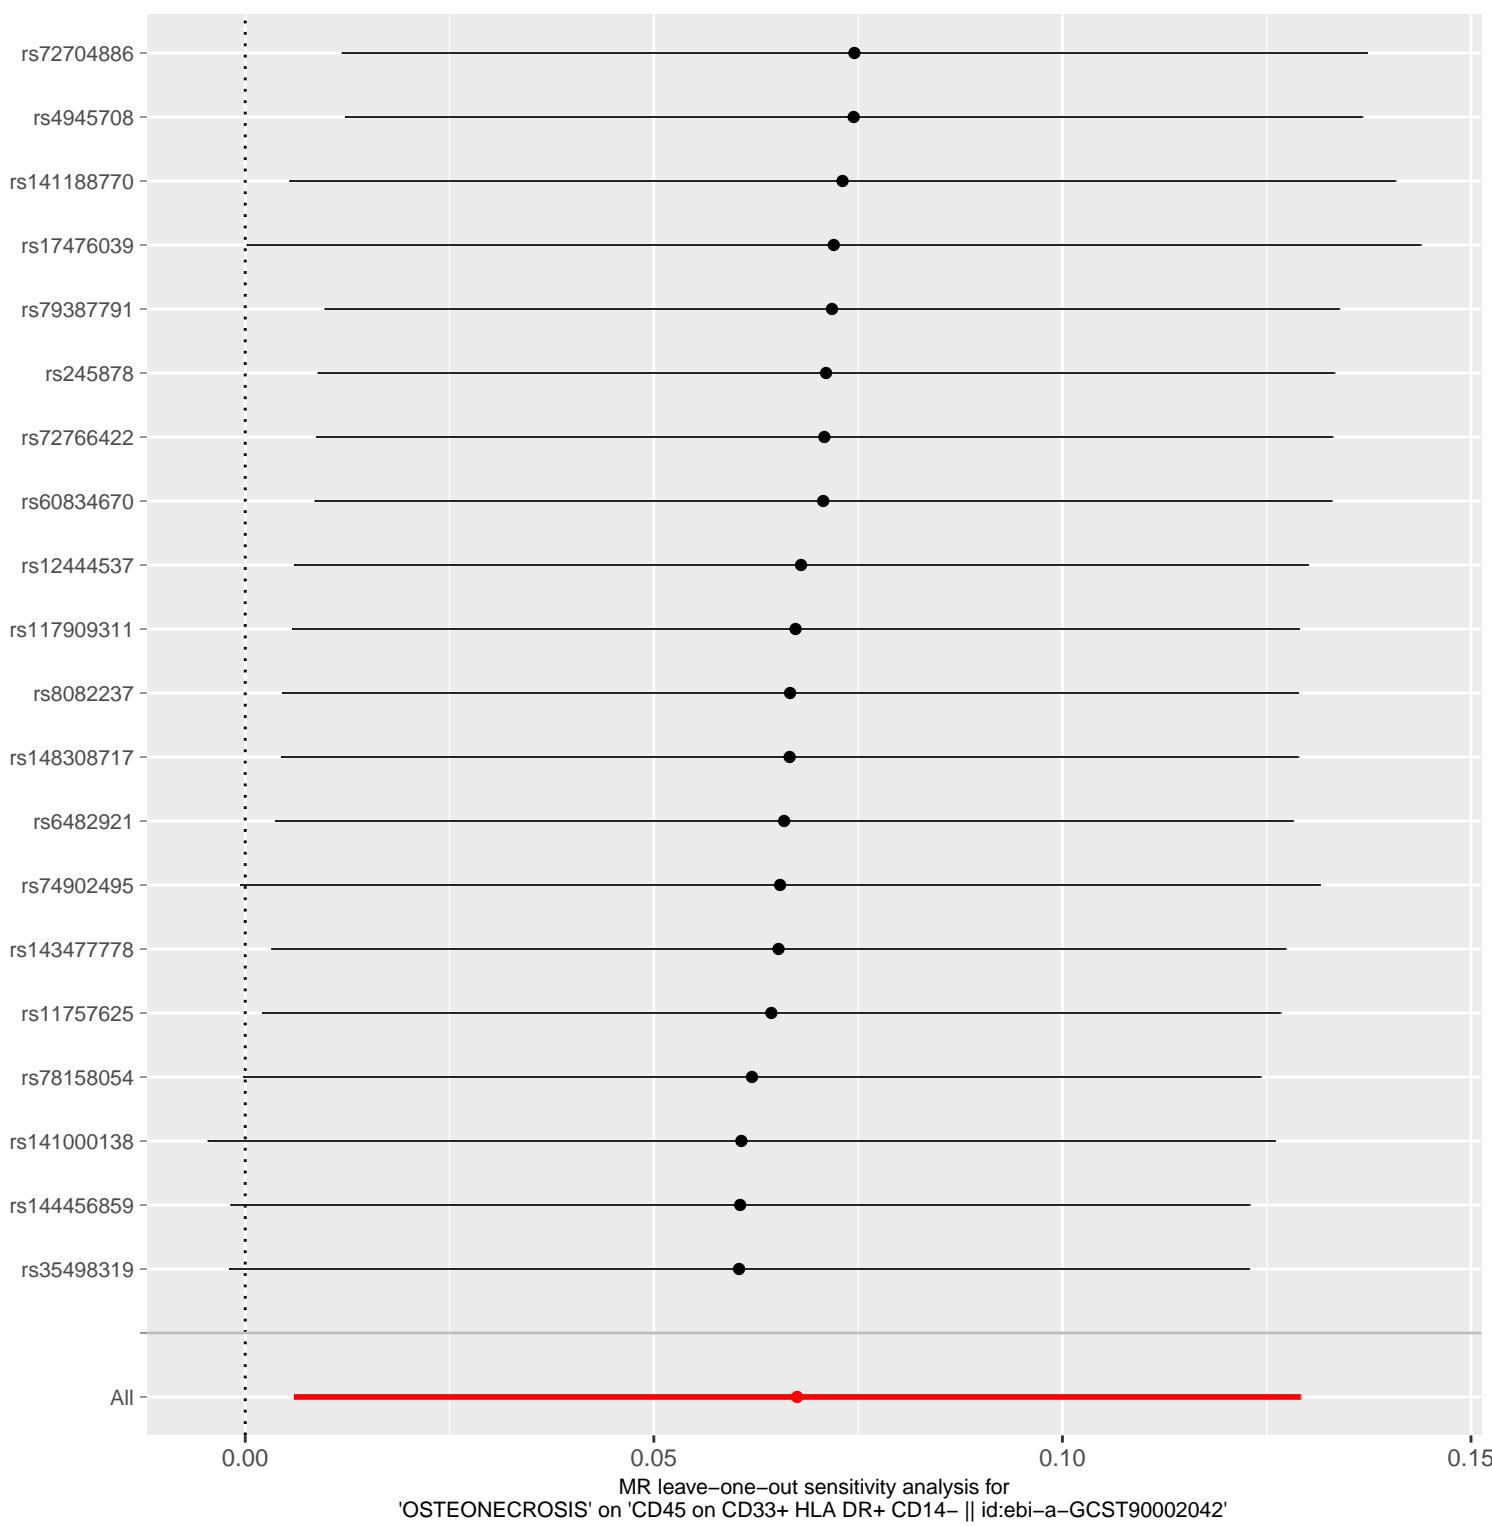



MR Test

- Inverse variance weighted
- MR Egger
- Simple mode
- Weighted median
- Weighted mode

SNP effect on CD45 on CD33+ HLA DR+ CD14- || id:ebi-a-GCST90002042

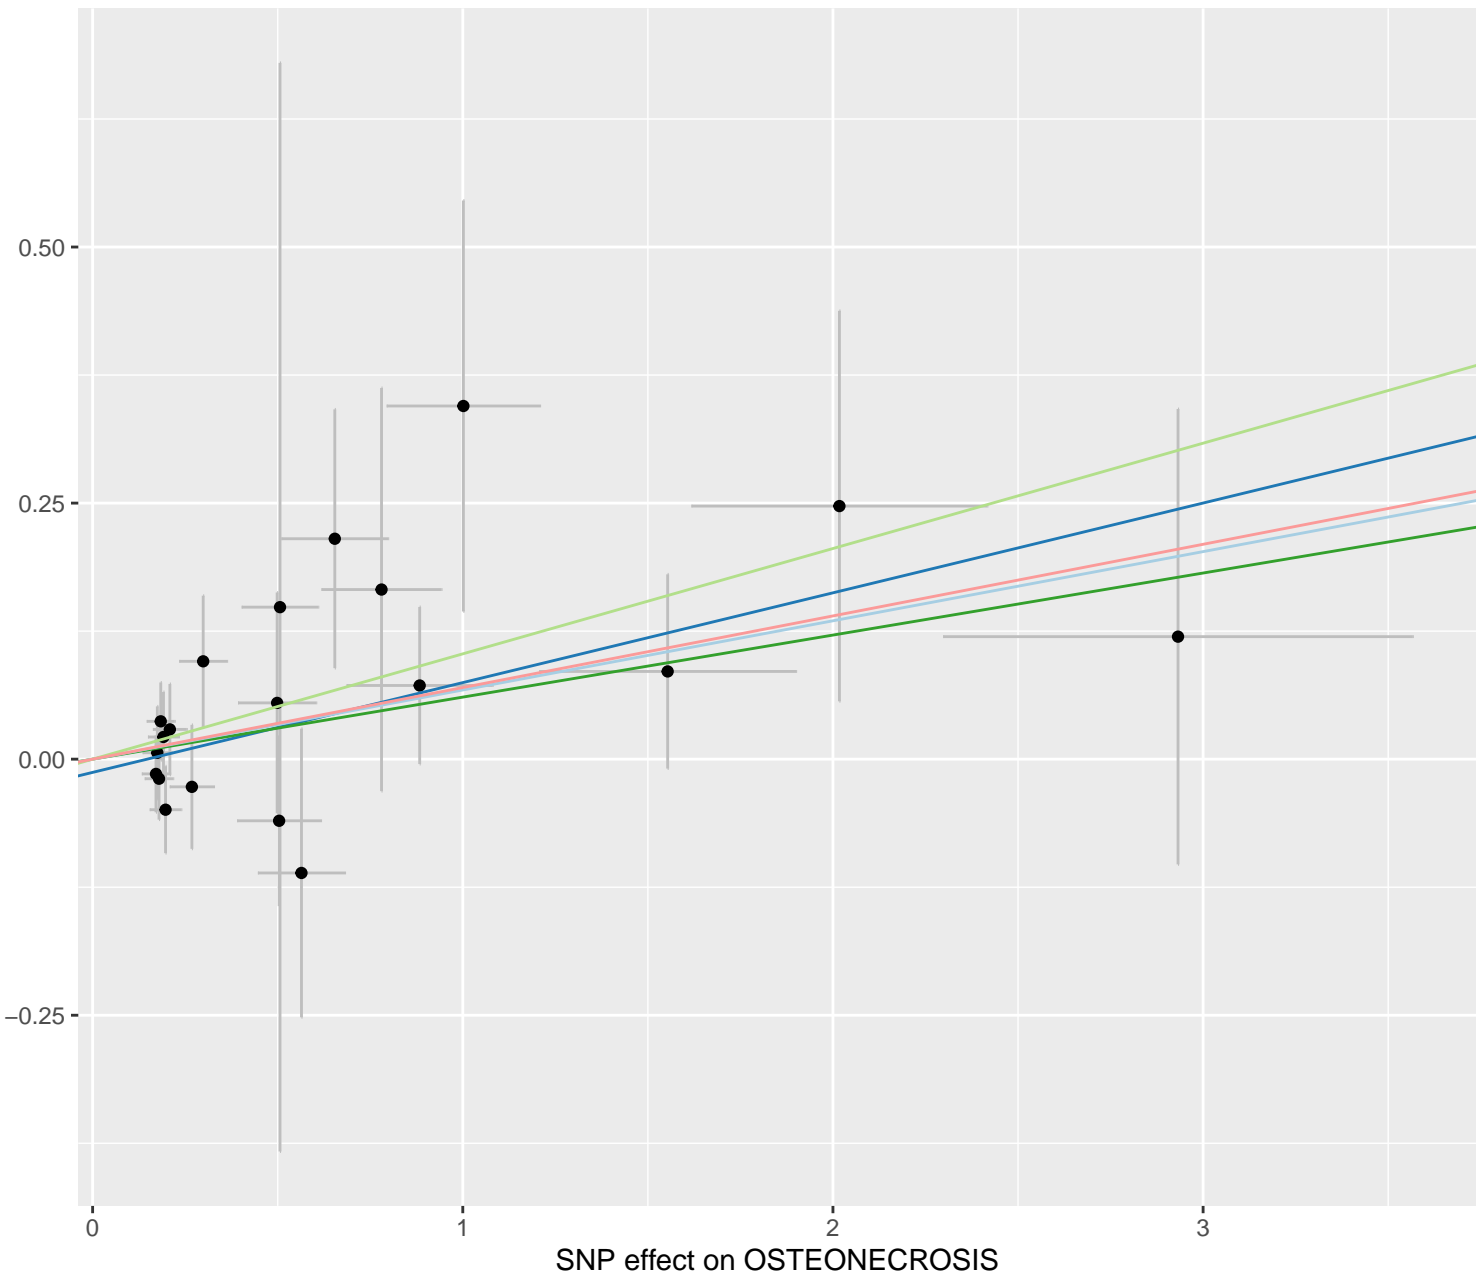

MR Method

- Inverse variance weighted
- MR Egger

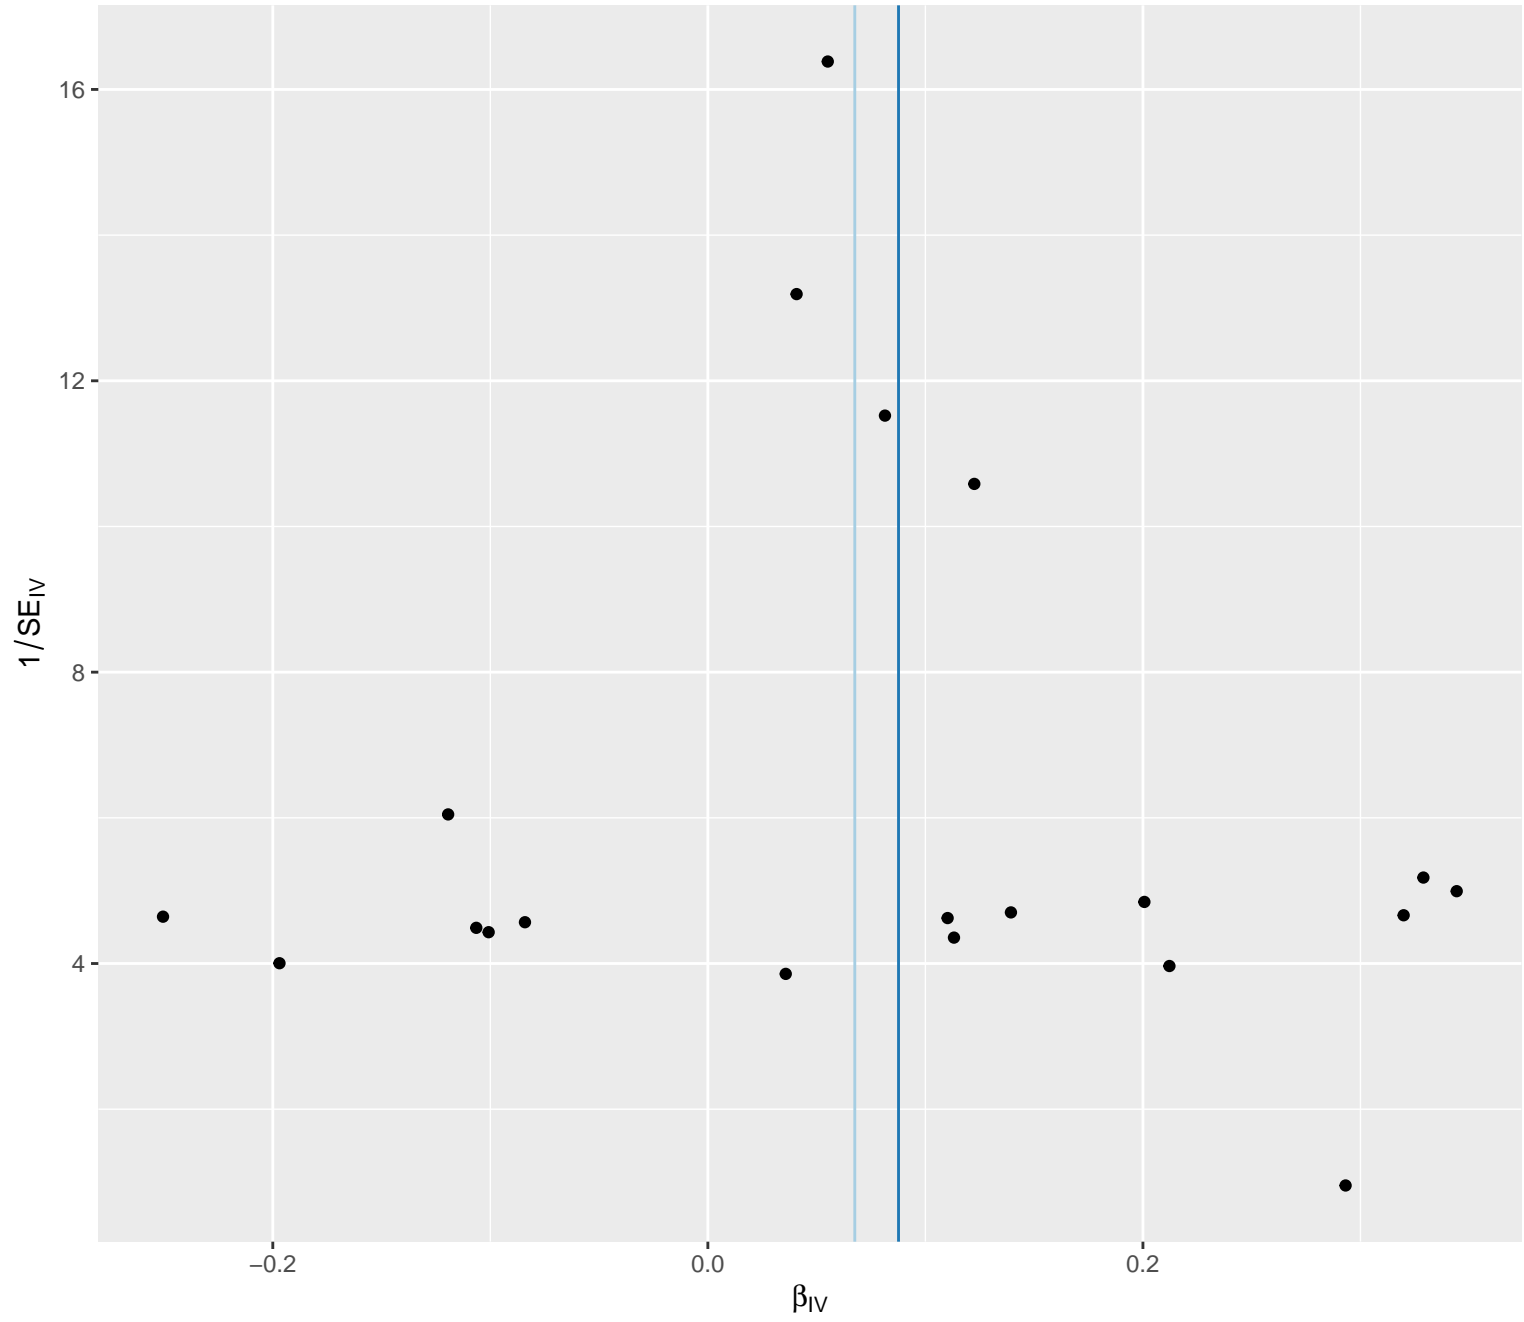

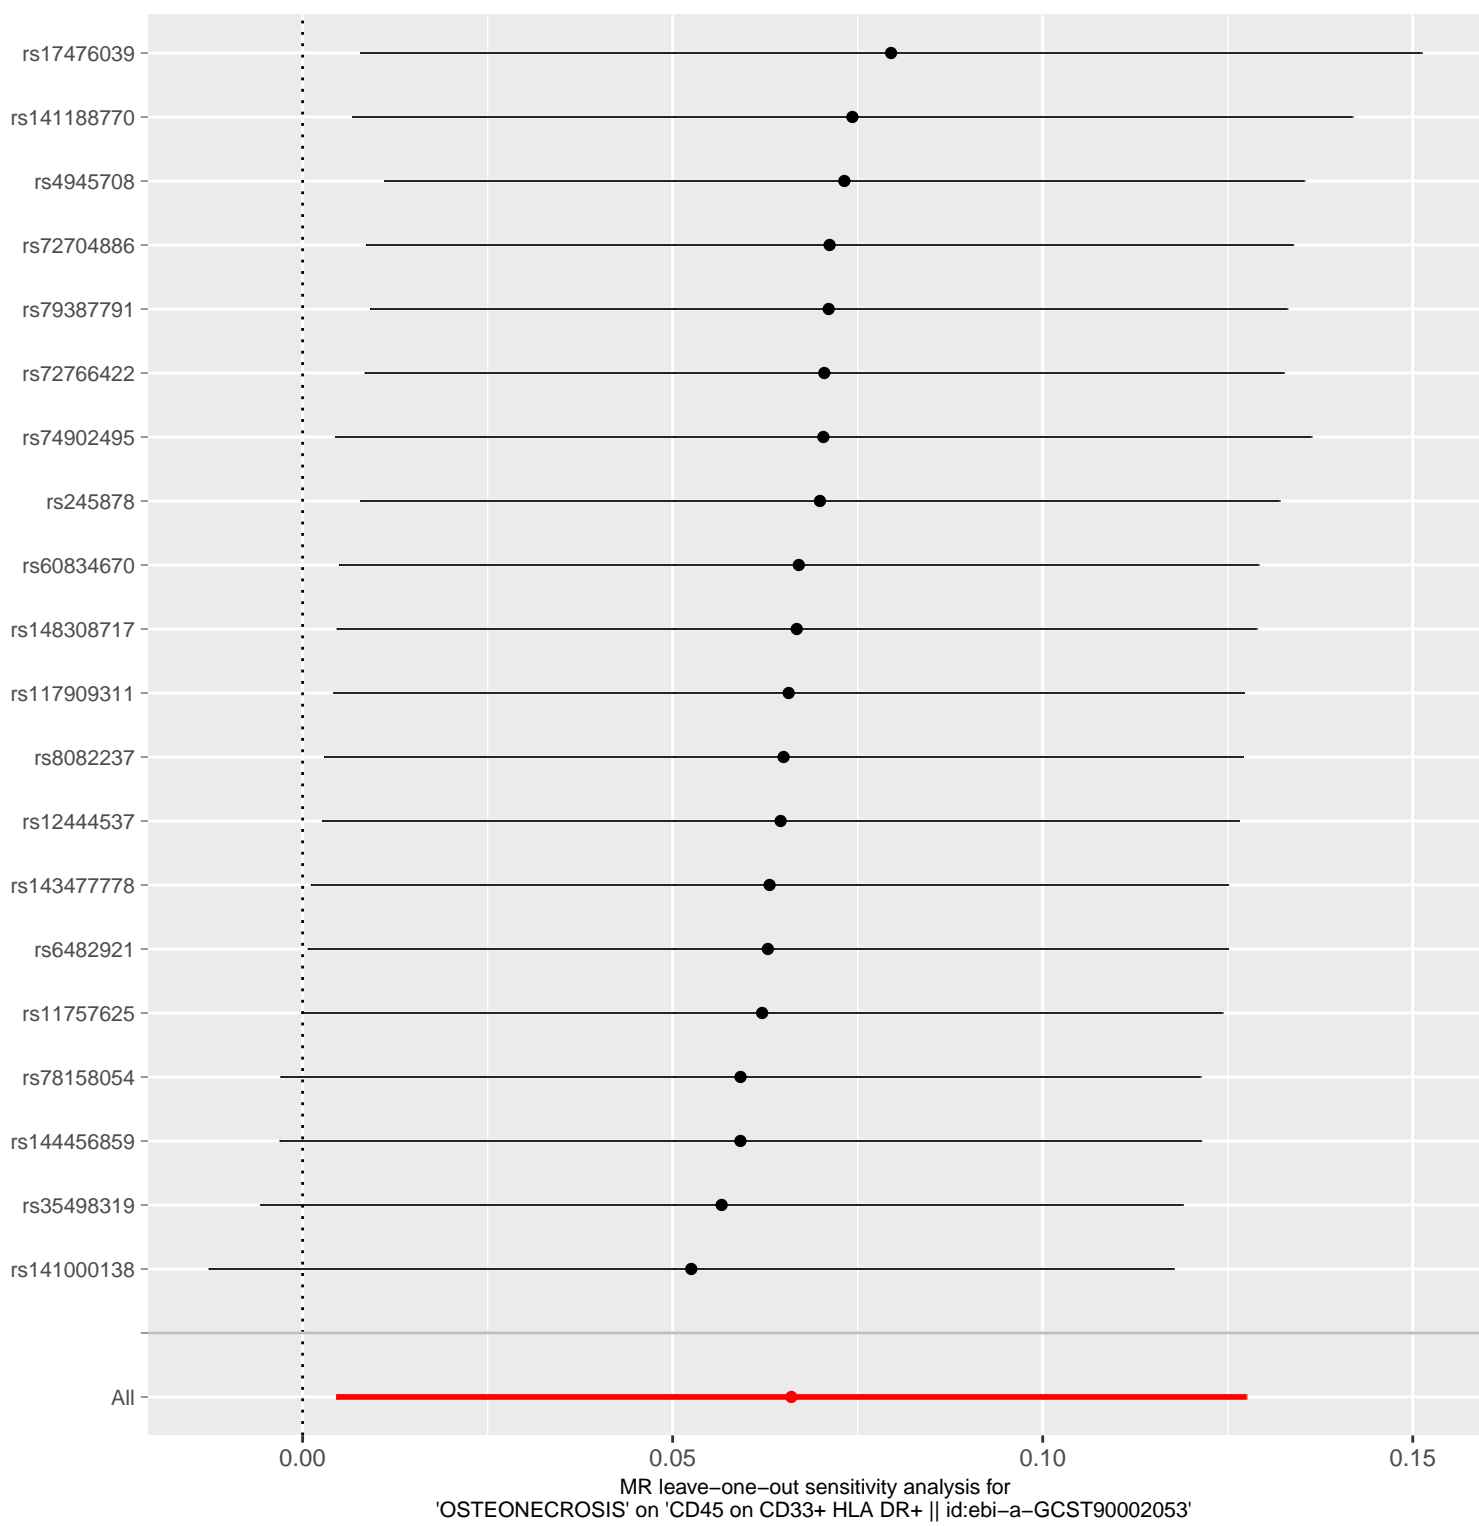

MR Test

- Inverse variance weighted
- MR Egger
- Simple mode
- Weighted median
- Weighted mode

SNP effect on CD45 on CD33+ HLA DR+ || id:ebi-a-GCST90002053

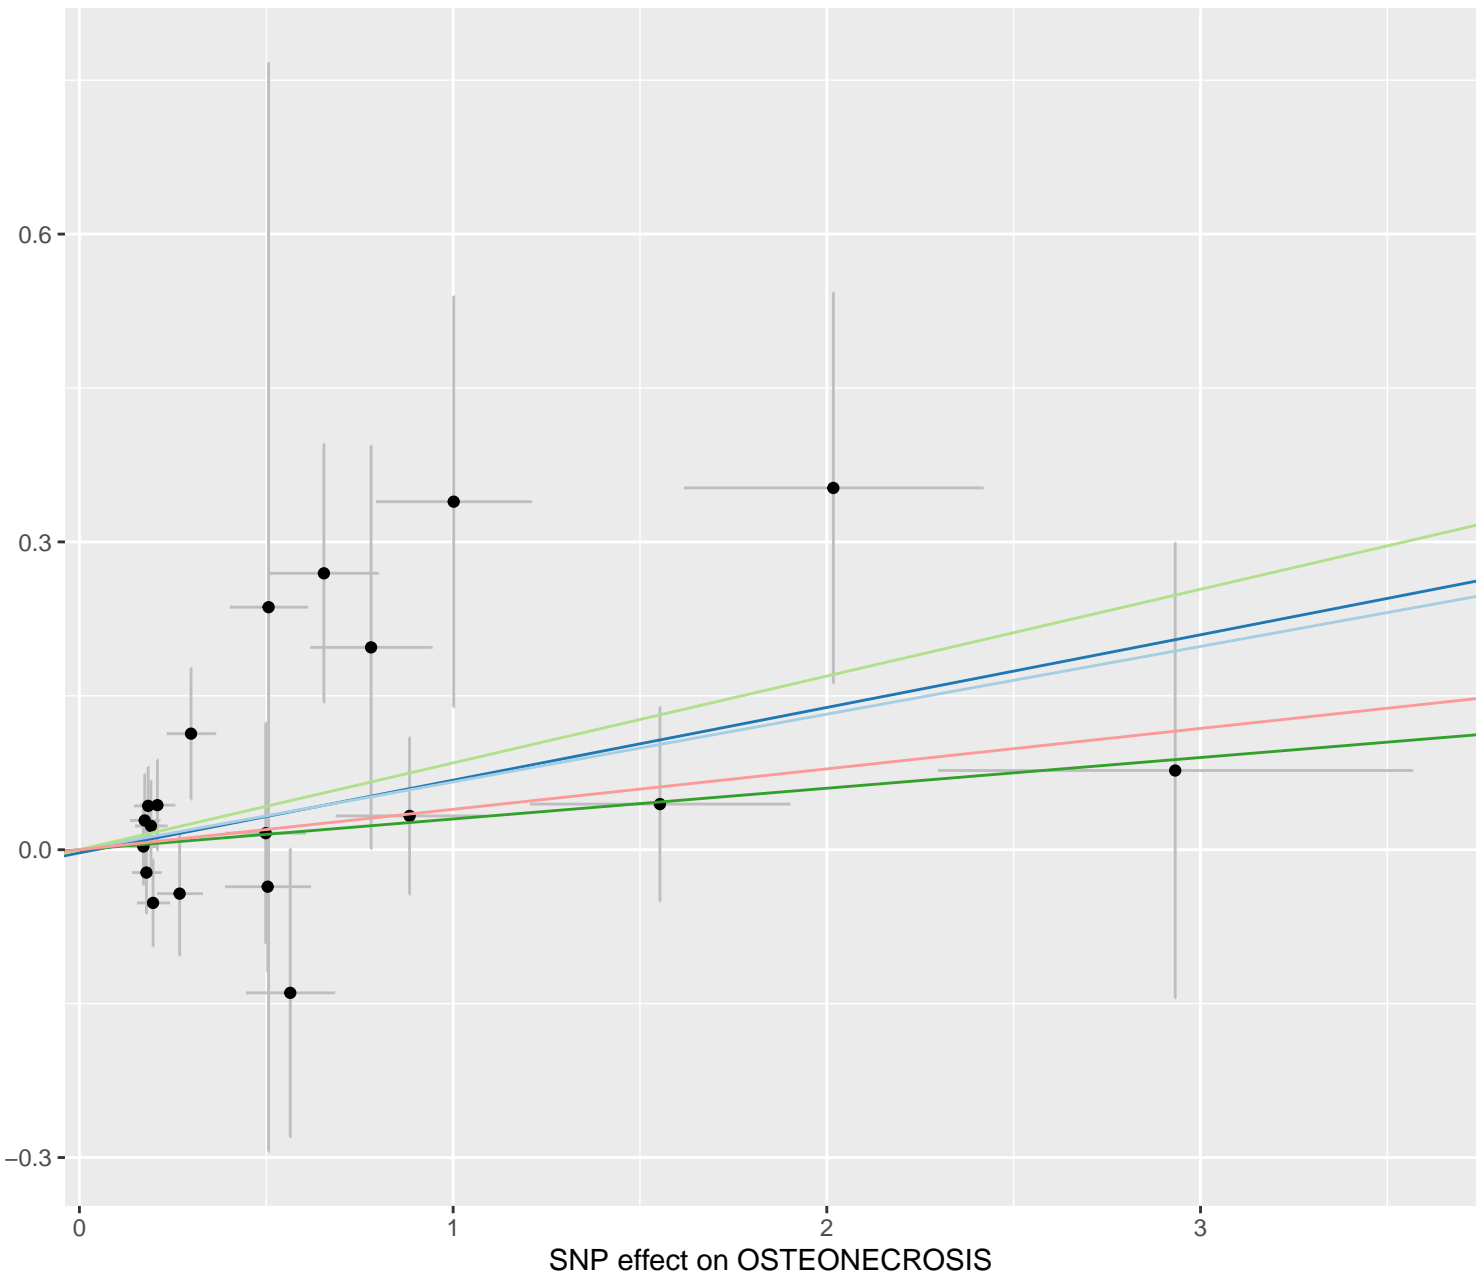

MR Method

- Inverse variance weighted
- MR Egger

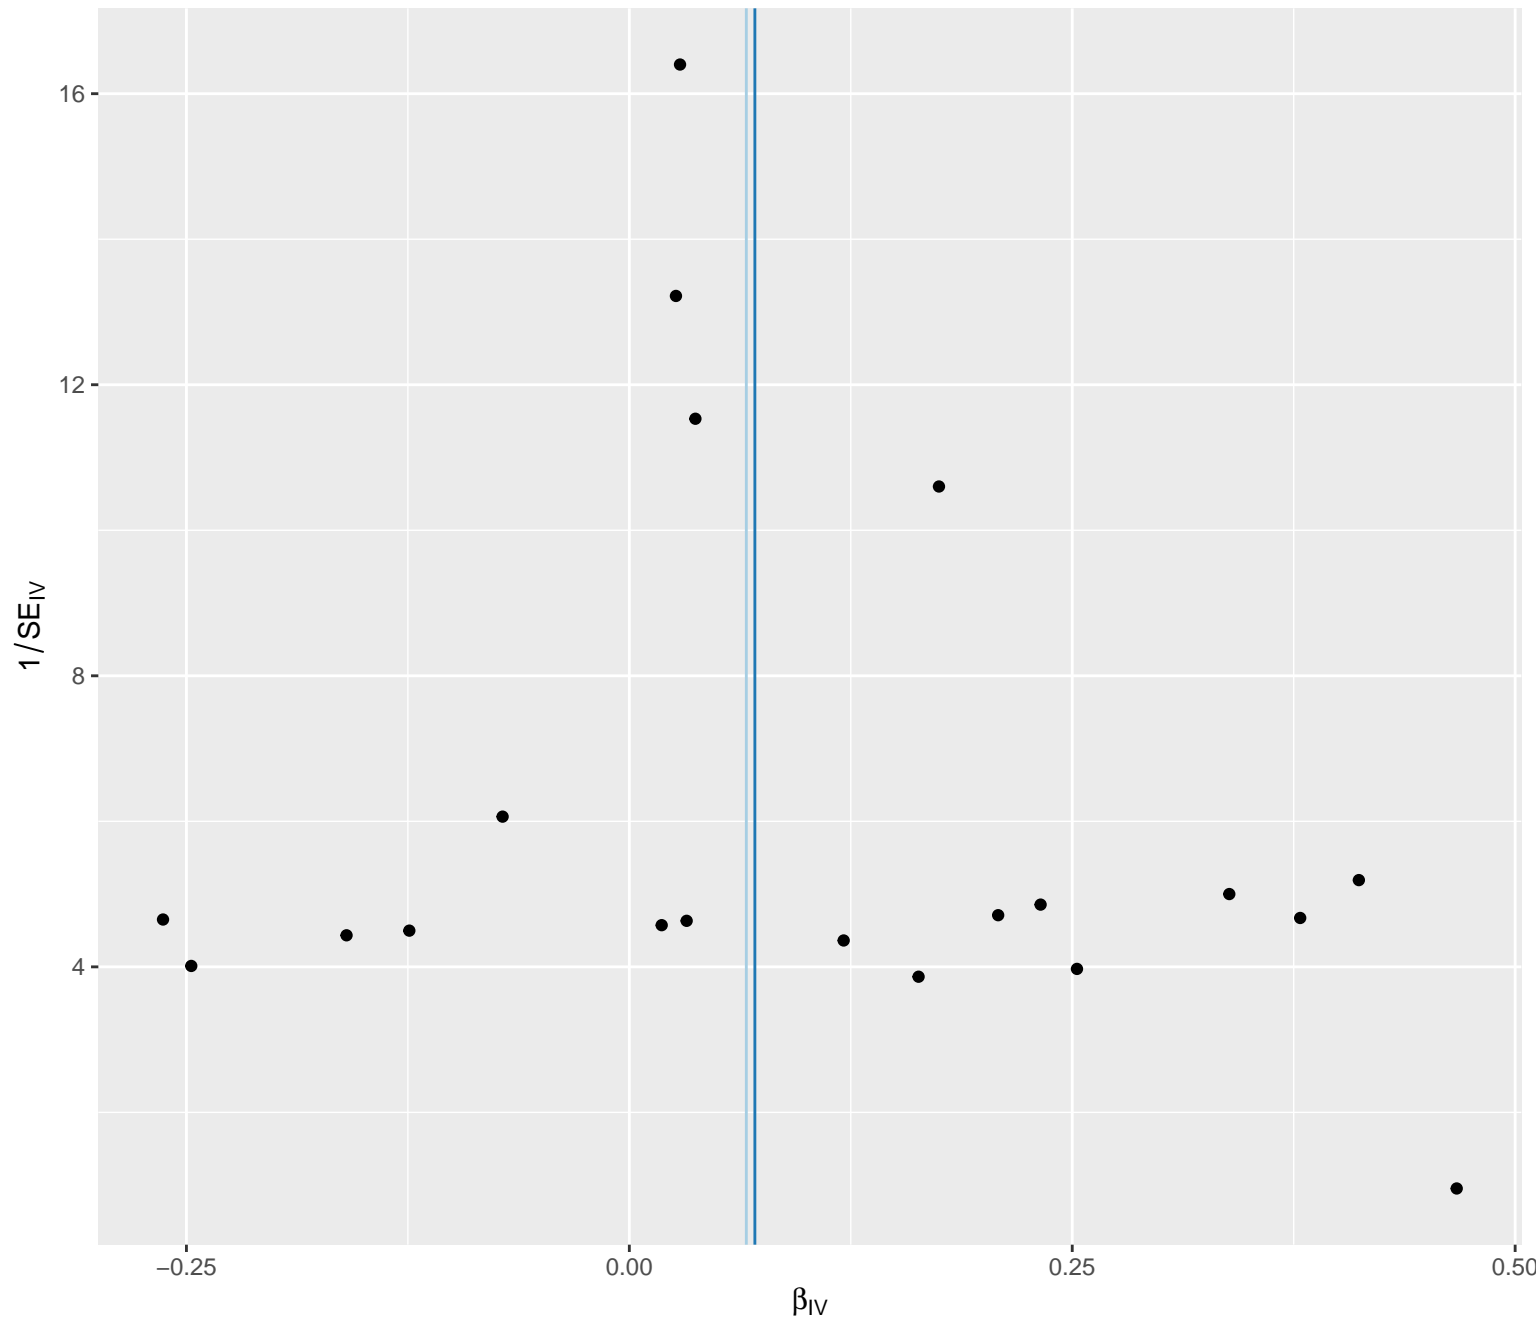

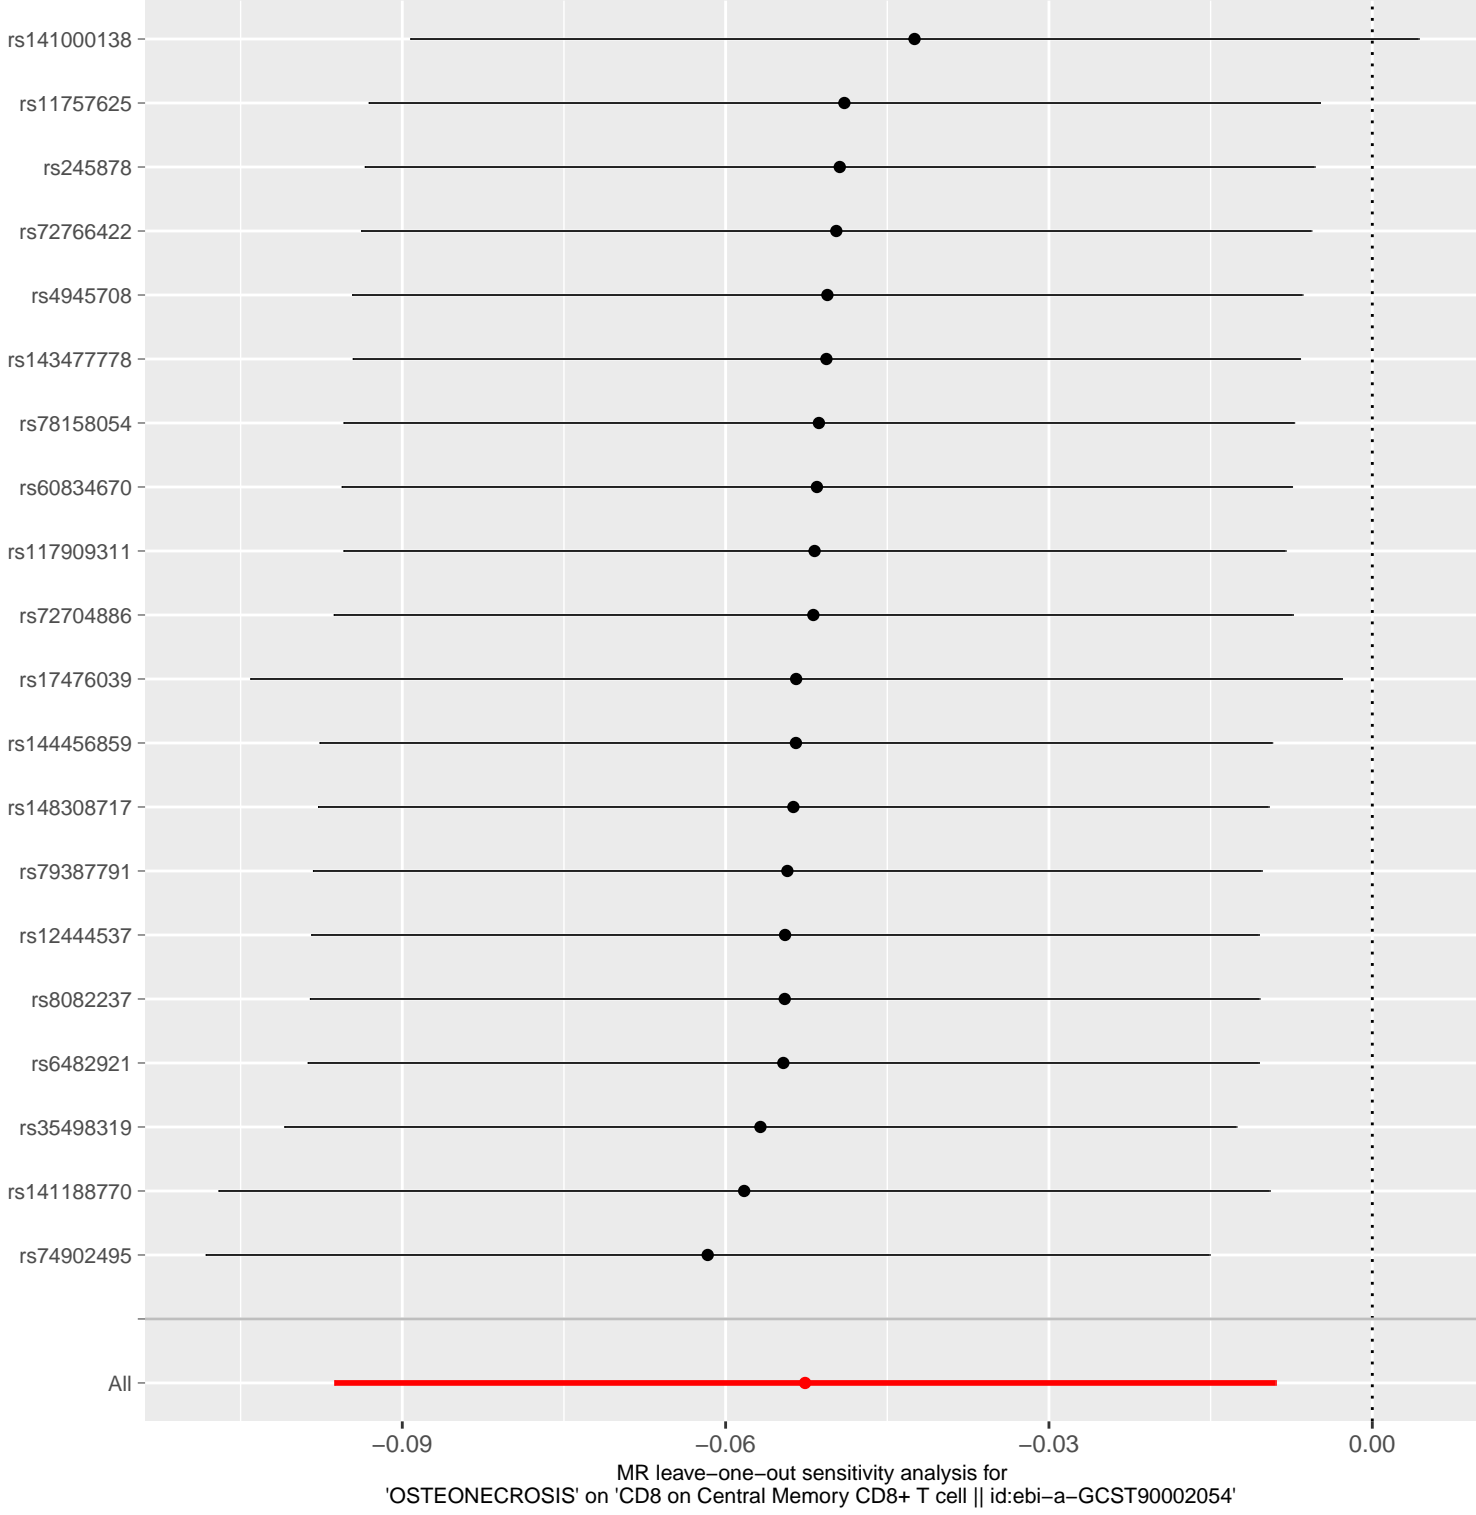

MR Test

- Inverse variance weighted
- MR Egger
- Simple mode
- Weighted median
- Weighted mode

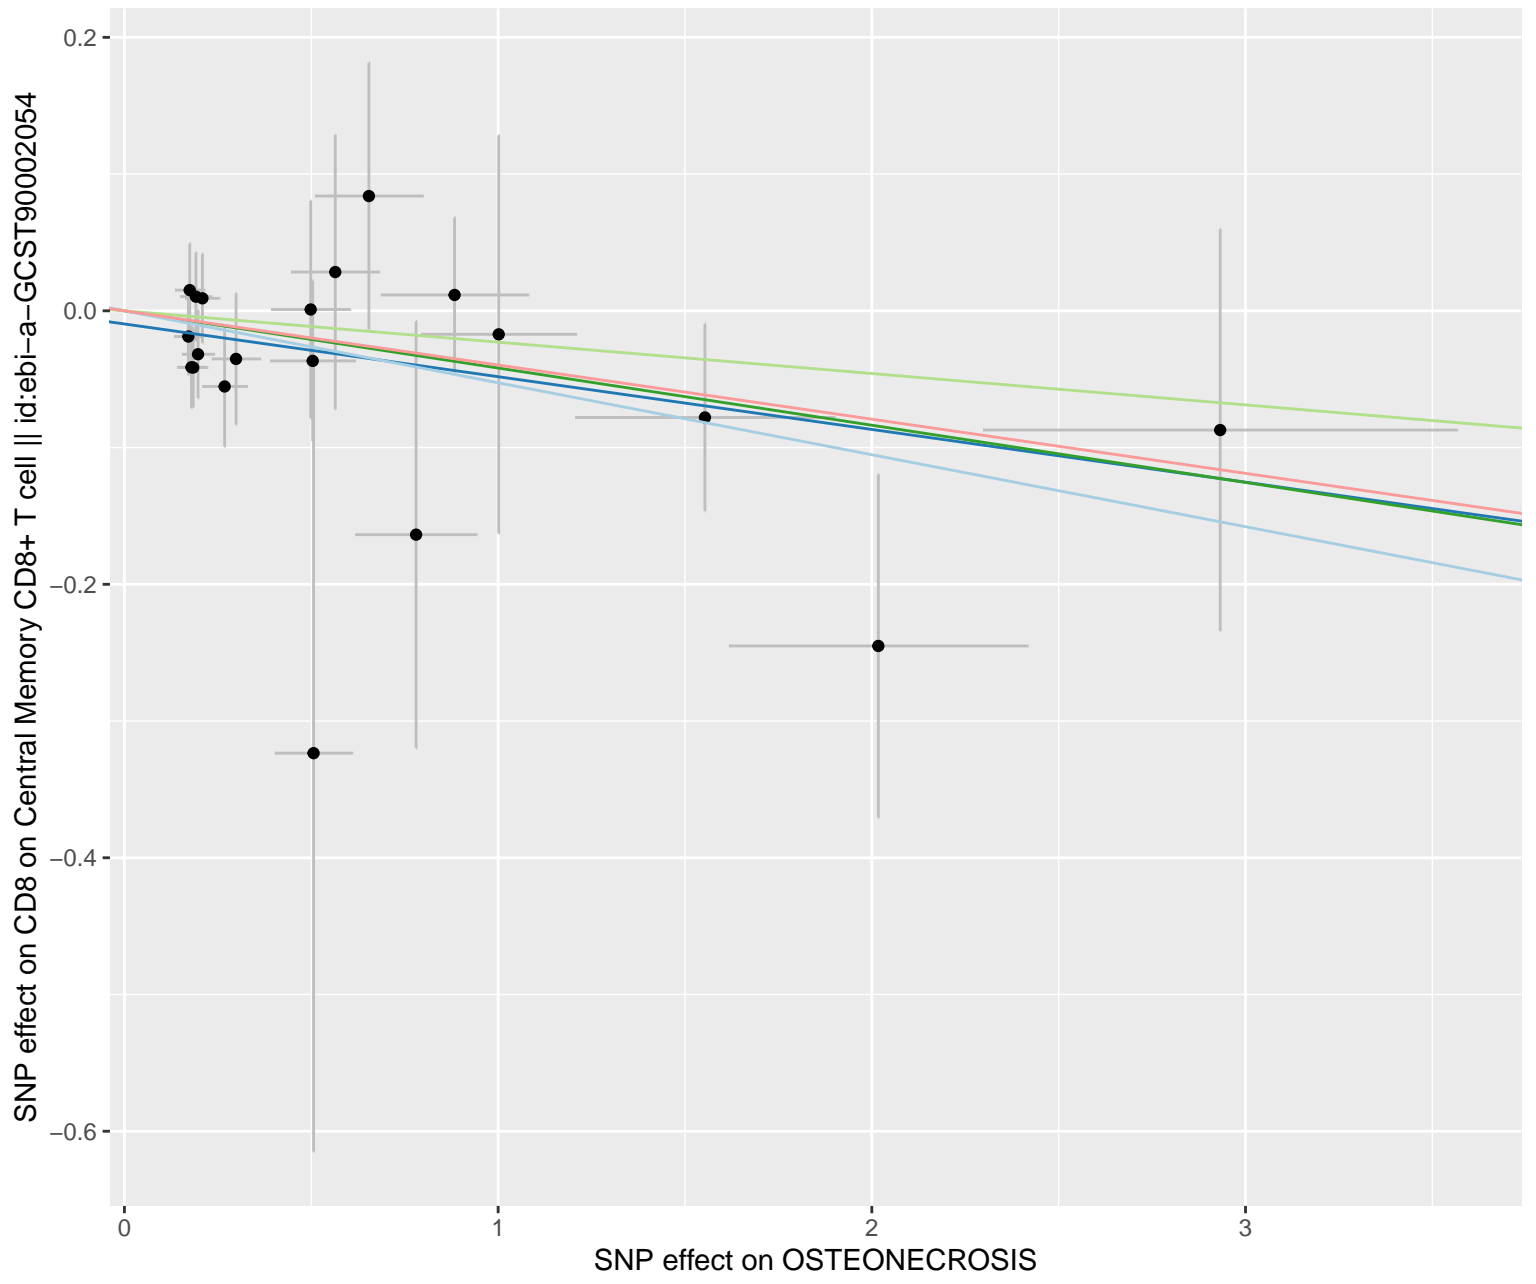

MR Method

- Inverse variance weighted
- MR Egger

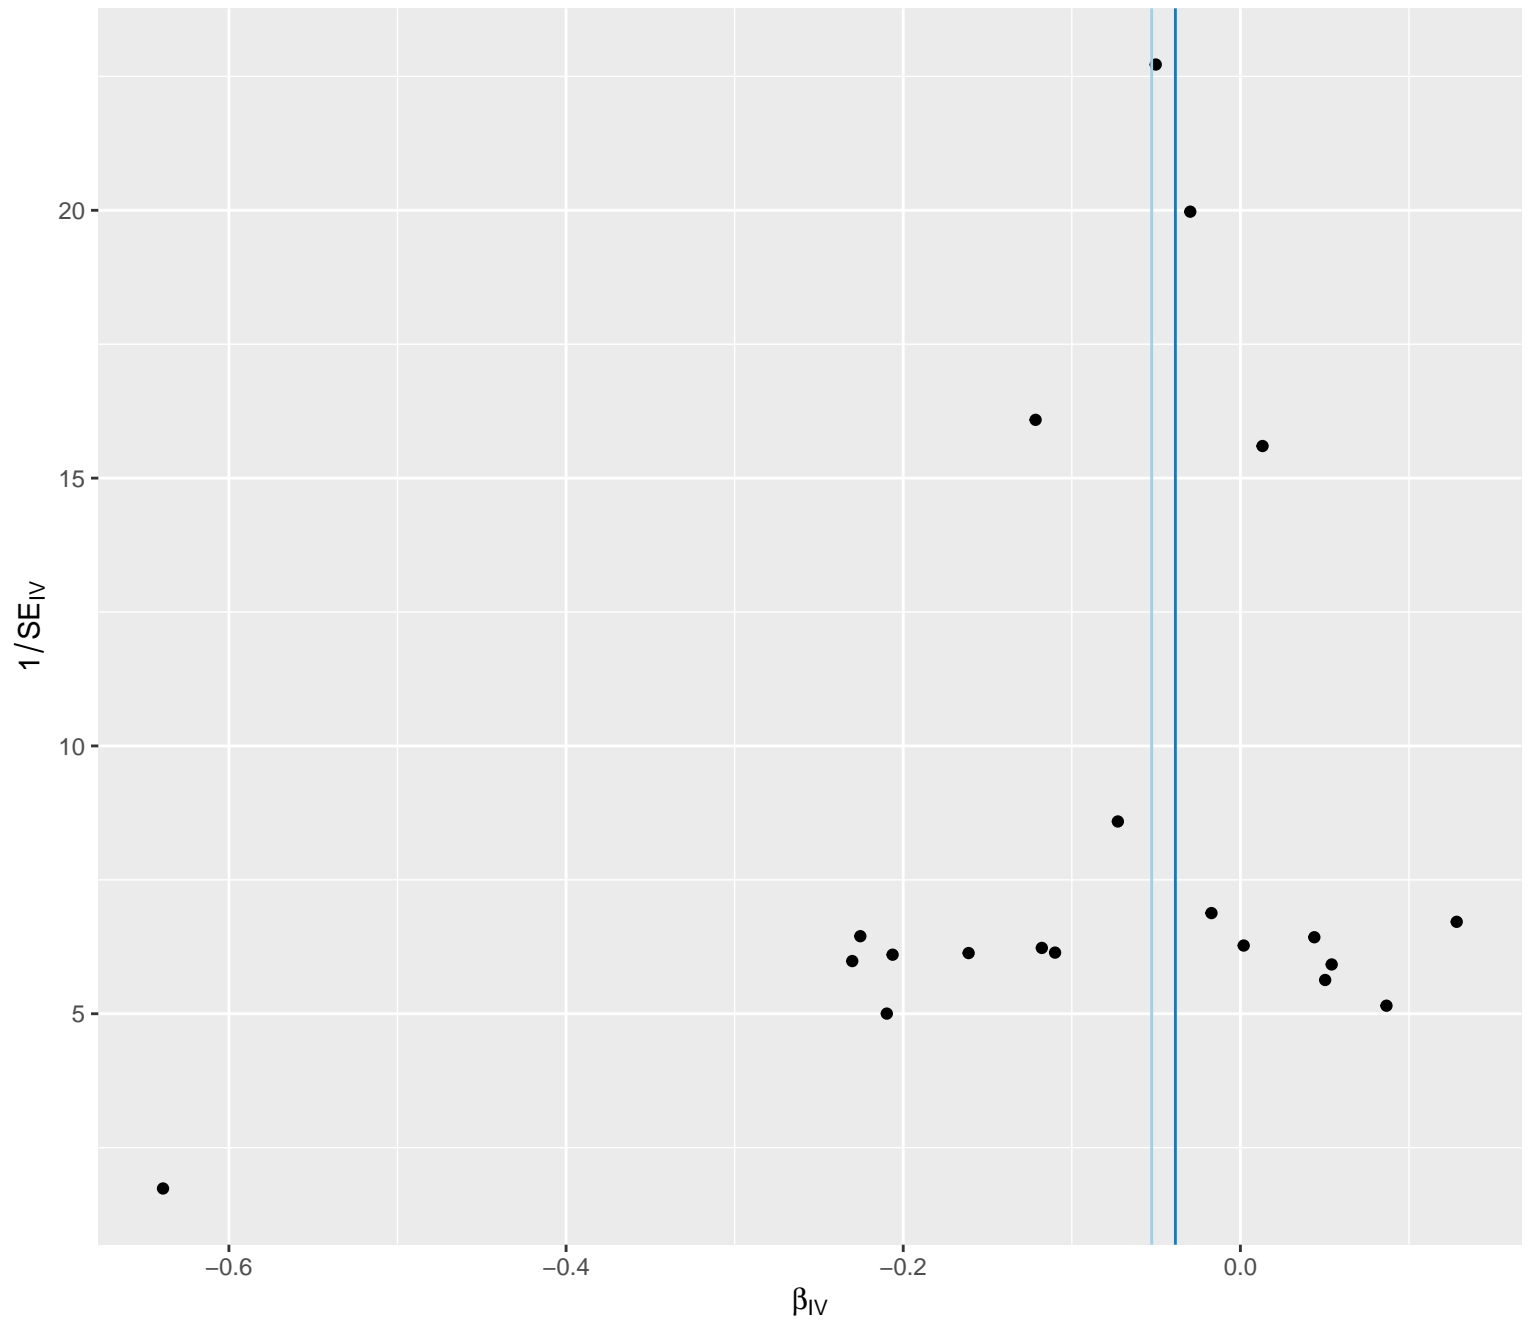

Supplement: js9-110-3285-s005.pdf [file js9-110-3285-s005.pdf]
