# Supplementary material for: Complex causal association between genetically predicted 731 immunocyte phenotype and osteonecrosis: a bidirectional two-sample Mendelian randomization analysis
Source: PubMed Central journal article supplement (PMC11175804; doi:10.1097/js9.0000000000001327), 2024-03-18
Supplement: js9-110-3285-s002.pdf [file js9-110-3285-s002.pdf]

| ID                                  | method                    | nsnp | b            | se          | pval        | OR(95%CI)           |
|-------------------------------------|---------------------------|------|--------------|-------------|-------------|---------------------|
| CD62L- monocyte %monocyte           | MR Egger                  | 21   | 0.126872392  | 0.108538766 | 0.256895597 | 1.14(0.92 to 1.40)  |
| CD62L- monocyte %monocyte           | Weighted median           | 21   | 0.077535783  | 0.071361716 | 0.277249917 | 1.08(0.94 to 1.24)  |
| CD62L- monocyte %monocyte           | Inverse variance weighted | 21   | 0.145516309  | 0.047801609 | 0.002333219 | 1.16(1.05 to 1.27)  |
| CD62L- monocyte %monocyte           | Simple mode               | 21   | 0.067647127  | 0.108059022 | 0.538381279 | 1.07(0.87 to 1.32)  |
| CD62L- monocyte %monocyte           | Weighted mode             | 21   | 0.054031490  | 0.095406988 | 0.577472300 | 1.06(0.88 to 1.27)  |
| CD11c+ CD62L- monocyte AC           | MR Egger                  | 22   | -0.070804857 | 0.054818974 | 0.211219413 | 0.93(0.84 to 1.04)  |
| CD11c+ CD62L- monocyte AC           | Weighted median           | 22   | -0.082578856 | 0.051396812 | 0.108121912 | 0.92(0.83 to 1.02)  |
| CD11c+ CD62L- monocyte AC           | Inverse variance weighted | 22   | -0.083155209 | 0.039292150 | 0.034316633 | 0.92(0.85 to 0.99)  |
| CD11c+ CD62L- monocyte AC           | Simple mode               | 22   | -0.100083264 | 0.078151637 | 0.214288055 | 0.90(0.78 to 1.05)  |
| CD11c+ CD62L- monocyte AC           | Weighted mode             | 22   | -0.085154513 | 0.049741956 | 0.101640641 | 0.92(0.83 to 1.01)  |
| Resting Treg % CD4 Treg             | MR Egger                  | 29   | -0.012013518 | 0.027562625 | 0.666401477 | 0.99(0.94 to 1.04)  |
| Resting Treg % CD4 Treg             | Weighted median           | 29   | -0.023340972 | 0.032422866 | 0.471591309 | 0.98(0.92 to 1.04)  |
| Resting Treg % CD4 Treg             | Inverse variance weighted | 29   | -0.044577456 | 0.021930648 | 0.042087325 | 0.96(0.92 to 1.00)  |
| Resting Treg % CD4 Treg             | Simple mode               | 29   | -0.072636215 | 0.057347349 | 0.215733475 | 0.93(0.83 to 1.04)  |
| Resting Treg % CD4 Treg             | Weighted mode             | 29   | -0.040813637 | 0.025277153 | 0.117601855 | 0.96(0.91 to 1.01)  |
| Secreting Treg % CD4 Treg           | MR Egger                  | 29   | 0.056935985  | 0.039433860 | 0.160289607 | 1.06(0.98 to 1.14)  |
| Secreting Treg % CD4 Treg           | Weighted median           | 29   | 0.051922475  | 0.038570922 | 0.178252244 | 1.05(0.98 to 1.14)  |
| Secreting Treg % CD4 Treg           | Inverse variance weighted | 29   | 0.070611622  | 0.030843383 | 0.022058415 | 1.07(1.01 to 1.14)  |
| Secreting Treg % CD4 Treg           | Simple mode               | 29   | 0.132840938  | 0.084157962 | 0.125689637 | 1.14(0.97 to 1.35)  |
| Secreting Treg % CD4 Treg           | Weighted mode             | 29   | 0.056525600  | 0.035043069 | 0.117953115 | 1.06(0.99 to 1.13)  |
| Activated & resting Treg % CD4 Treg | MR Egger                  | 26   | -0.054977269 | 0.039998155 | 0.181987498 | 0.95(0.88 to 1.02)  |
| Activated & resting Treg % CD4 Treg | Weighted median           | 26   | -0.048562739 | 0.038241693 | 0.204123855 | 0.95(0.88 to 1.03)  |
| Activated & resting Treg % CD4 Treg | Inverse variance weighted | 26   | -0.062857745 | 0.031153805 | 0.043626823 | 0.94(0.88 to 1.00)  |
| Activated & resting Treg % CD4 Treg | Simple mode               | 26   | -0.087840544 | 0.087582445 | 0.325495888 | 0.92(0.77 to 1.09)  |
| Activated & resting Treg % CD4 Treg | Weighted mode             | 26   | -0.056563732 | 0.035165431 | 0.120282035 | 0.95(0.88 to 1.01)  |
| CM DN (CD4-CD8-) AC                 | MR Egger                  | 4    | -0.128804120 | 0.079063628 | 0.244841060 | 0.88(0.75 to 1.03)  |
| CM DN (CD4-CD8-) AC                 | Weighted median           | 4    | -0.109554967 | 0.060736389 | 0.071266102 | 0.90(0.80 to 1.01)  |
| CM DN (CD4-CD8-) AC                 | Inverse variance weighted | 4    | -0.106033494 | 0.051293157 | 0.038714796 | 0.90(0.81 to 0.99)  |
| CM DN (CD4-CD8-) AC                 | Simple mode               | 4    | -0.096636048 | 0.071289254 | 0.268265681 | 0.91(0.79 to 1.04)  |
| CM DN (CD4-CD8-) AC                 | Weighted mode             | 4    | -0.109146950 | 0.054439223 | 0.138661904 | 0.90(0.81 to 1.00)  |
| T cell %lymphocyte                  | MR Egger                  | 17   | -0.308152424 | 0.241087117 | 0.220611863 | 0.73(0.46 to 1.18)  |
| T cell %lymphocyte                  | Weighted median           | 17   | -0.125859443 | 0.106467606 | 0.237150798 | 0.88(0.72 to 1.06)  |
| T cell %lymphocyte                  | Inverse variance weighted | 17   | -0.160512406 | 0.077059895 | 0.037255193 | 0.85(0.73 to 0.99)  |
| T cell %lymphocyte                  | Simple mode               | 17   | 0.022832810  | 0.189449331 | 0.905570164 | 1.02(0.71 to 1.48)  |
| T cell %lymphocyte                  | Weighted mode             | 17   | -0.056284669 | 0.132976495 | 0.677841977 | 0.95(0.73 to 1.23)  |
| CD28- DN (CD4-CD8-) %DN             | MR Egger                  | 27   | 0.050438874  | 0.067038543 | 0.458845000 | 1.05(0.92 to 1.20)  |
| CD28- DN (CD4-CD8-) %DN             | Weighted median           | 27   | 0.092560026  | 0.06316016  | 0.156450564 | 1.10(0.97 to 1.25)  |
| CD28- DN (CD4-CD8-) %DN             | Inverse variance weighted | 27   | 0.091794078  | 0.045784394 | 0.044971530 | 1.10(1.00 to 1.20)  |
| CD28- DN (CD4-CD8-) %DN             | Simple mode               | 27   | 0.208169429  | 0.117179015 | 0.087353704 | 1.23(0.98 to 1.55)  |
| CD28- DN (CD4-CD8-) %DN             | Weighted mode             | 27   | 0.085366058  | 0.064173995 | 0.194994324 | 1.09(0.96 to 1.24)  |
| CD28+ DN (CD4-CD8-) %DN             | MR Egger                  | 27   | -0.050438874 | 0.067038543 | 0.458845000 | 0.95(0.83 to 1.08)  |
| CD28+ DN (CD4-CD8-) %DN             | Weighted median           | 27   | -0.092560026 | 0.065651550 | 0.158578638 | 0.91(0.80 to 1.04)  |
| CD28+ DN (CD4-CD8-) %DN             | Inverse variance weighted | 27   | -0.091794078 | 0.045784394 | 0.044971530 | 0.91(0.83 to 1.00)  |
| CD28+ DN (CD4-CD8-) %DN             | Simple mode               | 27   | -0.208169429 | 0.124715134 | 0.107084863 | 0.81(0.64 to 1.04)  |
| CD28+ DN (CD4-CD8-) %DN             | Weighted mode             | 27   | -0.085366058 | 0.067027390 | 0.214073989 | 0.92(0.81 to 1.05)  |
| CD45RA- CD28- CD8br %T cell         | MR Egger                  | 173  | -0.001467573 | 0.000834034 | 0.080262530 | 1.00(1.00 to 1.00)  |
| CD45RA- CD28- CD8br %T cell         | Weighted median           | 173  | -0.000987786 | 0.001069525 | 0.355707872 | 1.00(1.00 to 1.00)  |
| CD45RA- CD28- CD8br %T cell         | Inverse variance weighted | 173  | -0.001443538 | 0.000636150 | 0.023257563 | 1.00(1.00 to 1.00)  |
| CD45RA- CD28- CD8br %T cell         | Simple mode               | 173  | -0.001578924 | 0.001849548 | 0.394469226 | 1.00(1.00 to 1.00)  |
| CD45RA- CD28- CD8br %T cell         | Weighted mode             | 173  | -0.001578924 | 0.000926993 | 0.090322786 | 1.00(1.00 to 1.00)  |
| CD45RA+ CD28- CD8br AC              | MR Egger                  | 693  | -0.000012500 | 0.000014300 | 0.381919416 | 1.00(1.00 to 1.00)  |
| CD45RA+ CD28- CD8br AC              | Weighted median           | 693  | -0.000010700 | 0.000017300 | 0.537732190 | 1.00(1.00 to 1.00)  |
| CD45RA+ CD28- CD8br AC              | Inverse variance weighted | 693  | -0.000025400 | 0.000010800 | 0.018961857 | 1.00(1.00 to 1.00)  |
| CD45RA+ CD28- CD8br AC              | Simple mode               | 693  | -0.000064800 | 0.000046300 | 0.162135978 | 1.00(1.00 to 1.00)  |
| CD45RA+ CD28- CD8br AC              | Weighted mode             | 693  | 0.000011800  | 0.000034600 | 0.733552013 | 1.00(1.00 to 1.00)  |
| CD19 on IgD+ CD38-                  | MR Egger                  | 30   | -0.074884153 | 0.031072872 | 0.022772359 | 0.93(0.87 to 0.99)  |
| CD19 on IgD+ CD38-                  | Weighted median           | 30   | -0.043608825 | 0.034527611 | 0.206584473 | 0.96(0.89 to 1.02)  |
| CD19 on IgD+ CD38-                  | Inverse variance weighted | 30   | -0.051645827 | 0.026024838 | 0.047202114 | 0.95(0.90 to 1.00)  |
| CD19 on IgD+ CD38-                  | Simple mode               | 30   | -0.053741196 | 0.071148018 | 0.456134316 | 0.95(0.82 to 1.09)  |
| CD19 on IgD+ CD38-                  | Weighted mode             | 30   | -0.049182798 | 0.029392543 | 0.105021559 | 0.95(0.90 to 1.01)  |
| CD19 on IgD+ CD38- naive            | MR Egger                  | 19   | -0.039815365 | 0.028200042 | 0.176024870 | 0.96(0.91 to 1.02)  |
| CD19 on IgD+ CD38- naive            | Weighted median           | 19   | -0.039644538 | 0.032382149 | 0.220849878 | 0.96(0.90 to 1.02)  |
| CD19 on IgD+ CD38- naive            | Inverse variance weighted | 19   | -0.049731001 | 0.024004781 | 0.038292272 | 0.95(0.91 to 1.00)  |
| CD19 on IgD+ CD38- naive            | Simple mode               | 19   | -0.034472261 | 0.085856034 | 0.692769801 | 0.97(0.82 to 1.14)  |
| CD19 on IgD+ CD38- naive            | Weighted mode             | 19   | -0.038593661 | 0.025723926 | 0.150872819 | 0.96(0.91 to 1.01)  |
| CD20 on IgD+ CD38-                  | MR Egger                  | 25   | -0.012533381 | 0.059191572 | 0.834172910 | 0.99(0.88 to 1.11)  |
| CD20 on IgD+ CD38-                  | Weighted median           | 25   | -0.068719961 | 0.070007589 | 0.326293346 | 0.93(0.81 to 1.07)  |
| CD20 on IgD+ CD38-                  | Inverse variance weighted | 25   | -0.093427926 | 0.042704759 | 0.028686811 | 0.91(0.84 to 0.99)  |
| CD20 on IgD+ CD38-                  | Simple mode               | 25   | -0.063089662 | 0.120820486 | 0.606333865 | 0.94(0.74 to 1.19)  |
| CD20 on IgD+ CD38-                  | Weighted mode             | 25   | -0.058626196 | 0.059925493 | 0.337676268 | 0.94(0.84 to 1.06)  |
| CD20 on IgD- CD24-                  | MR Egger                  | 26   | -0.071830234 | 0.064189320 | 0.274199639 | 0.93(0.82 to 1.06)  |
| CD20 on IgD- CD24-                  | Weighted median           | 26   | -0.066035444 | 0.064365606 | 0.304918443 | 0.94(0.83 to 1.06)  |
| CD20 on IgD- CD24-                  | Inverse variance weighted | 26   | -0.106443281 | 0.045667322 | 0.019761729 | 0.90(0.82 to 0.98)  |
| CD20 on IgD- CD24-                  | Simple mode               | 26   | -0.150085891 | 0.102111524 | 0.154083310 | 0.86(0.70 to 1.05)  |
| CD20 on IgD- CD24-                  | Weighted mode             | 26   | -0.080997668 | 0.058966585 | 0.181752054 | 0.92(0.82 to 1.04)  |
| CD20 on IgD- CD27-                  | MR Egger                  | 18   | -0.261340742 | 0.152149124 | 0.105147203 | 0.77(0.57 to 1.04)  |
| CD20 on IgD- CD27-                  | Weighted median           | 18   | -0.220365728 | 0.090391449 | 0.014772673 | 0.80(0.67 to 0.96)  |
| CD20 on IgD- CD27-                  | Inverse variance weighted | 18   | -0.130154232 | 0.064438917 | 0.043403320 | 0.88(0.77 to 1.00)  |
| CD20 on IgD- CD27-                  | Simple mode               | 18   | -0.243682451 | 0.141808503 | 0.103882088 | 0.78(0.59 to 1.03)  |
| CD20 on IgD- CD27-                  | Weighted mode             | 18   | -0.223368084 | 0.122695899 | 0.086332778 | 0.80(0.63 to 1.02)  |
| IgD on IgD+ CD38dim                 | MR Egger                  | 22   | 0.054290348  | 0.050225283 | 0.292587763 | 1.06(0.96 to 1.17)  |
| IgD on IgD+ CD38dim                 | Weighted median           | 22   | 0.031228851  | 0.045245348 | 0.490061307 | 1.03(0.94 to 1.13)  |
| IgD on IgD+ CD38dim                 | Inverse variance weighted | 22   | 0.071355756  | 0.033175433 | 0.031487147 | 1.07(1.01 to 1.15)  |
| IgD on IgD+ CD38dim                 | Simple mode               | 22   | 0.053625373  | 0.077292269 | 0.495411314 | 1.06(0.91 to 1.23)  |
| IgD on IgD+ CD38dim                 | Weighted mode             | 22   | 0.032666636  | 0.040204287 | 0.425611131 | 1.03(0.95 to 1.12)  |
| HVEM on CM CD4+                     | MR Egger                  | 16   | -0.108919545 | 0.047664821 | 0.039418665 | 0.90(0.82 to 0.98)  |
| HVEM on CM CD4+                     | Weighted median           | 16   | -0.065645581 | 0.047211855 | 0.164393186 | 0.94(0.85 to 1.03)  |
| HVEM on CM CD4+                     | Inverse variance weighted | 16   | -0.078555884 | 0.032277768 | 0.014943481 | 0.92(0.87 to 0.98)  |
| HVEM on CM CD4+                     | Simple mode               | 16   | -0.133650950 | 0.088521394 | 0.151865977 | 0.87(0.74 to 1.04)  |
| HVEM on CM CD4+                     | Weighted mode             | 16   | -0.069278199 | 0.056949899 | 0.242592342 | 0.93(0.83 to 1.04)  |
| HVEM on CD8br                       | MR Egger                  | 15   | -0.112098693 | 0.164448830 | 0.507414913 | 0.89(0.65 to 1.23)  |
| HVEM on CD8br                       | Weighted median           | 15   | -0.183451377 | 0.083574539 | 0.028159080 | 0.83(0.71 to 0.98)  |
| HVEM on CD8br                       | Inverse variance weighted | 15   | -0.147861700 | 0.066704560 | 0.026645956 | 0.86(0.76 to 0.98)  |
| HVEM on CD8br                       | Simple mode               | 15   | 0.076439222  | 0.187571935 | 0.689789569 | 1.08(0.75 to 1.56)  |
| HVEM on CD8br                       | Weighted mode             | 15   | -0.279397703 | 0.200167061 | 0.184511454 | 0.76(0.51 to 1.12)  |
| CD28 on secreting Treg              | MR Egger                  | 15   | -0.048767513 | 0.040145594 | 0.246059390 | 0.95(0.88 to 1.03)  |
| CD28 on secreting Treg              | Weighted median           | 15   | -0.046569543 | 0.045684914 | 0.308030335 | 0.95(0.87 to 1.04)  |
| CD28 on secreting Treg              | Inverse variance weighted | 15   | -0.070670892 | 0.033056397 | 0.032525790 | 0.93(0.87 to 0.99)  |
| CD28 on secreting Treg              | Simple mode               | 15   | -0.145715170 | 0.080811854 | 0.092924931 | 0.86(0.74 to 1.01)  |
| CD28 on secreting Treg              | Weighted mode             | 15   | -0.061952317 | 0.039110112 | 0.135505053 | 0.94(0.87 to 1.01)  |
| CD28 on activated & secreting Treg  | MR Egger                  | 23   | -0.043858442 | 0.022966317 | 0.069929313 | 0.96(0.91 to 1.00)  |
| CD28 on activated & secreting Treg  | Weighted median           | 23   | -0.044929176 | 0.028469991 | 0.114537132 | 0.96(0.90 to 1.01)  |
| CD28 on activated & secreting Treg  | Inverse variance weighted | 23   | -0.044640598 | 0.020842079 | 0.032205590 | 0.96(0.92 to 1.00)  |
| CD28 on activated & secreting Treg  | Simple mode               | 23   | -0.090780338 | 0.067266112 | 0.190878867 | 0.91(0.80 to 1.04)  |
| CD28 on activated & secreting Treg  | Weighted mode             | 23   | -0.047913545 | 0.023645912 | 0.055027991 | 0.95(0.91 to 1.00)  |
| CD28 on CD28+ DN (CD4-CD8-)         | MR Egger                  | 3    | 0.927294188  | 0.950054054 | 0.507717626 | 2.53(0.39 to 16.27) |
| CD28 on CD28+ DN (CD4-CD8-)         | Weighted median           | 3    | 0.511919413  | 0.268672554 | 0.056732578 | 1.67(0.99 to 2.83)  |
| CD28 on CD28+ DN (CD4-CD8-)         | Inverse variance weighted | 3    | 0.569773531  | 0.226053816 | 0.011718104 | 1.77(1.14 to 2.75)  |
| CD28 on CD28+ DN (CD4-CD8-)         | Simple mode               | 3    | 0.510881965  | 0.325007073 | 0.256586943 | 1.67(0.88 to 3.15)  |
| CD28 on CD28+ DN (CD4-CD8-)</       |                           |      |              |             |             |                     |
