# Supplementary material for: Complex causal association between genetically predicted 731 immunocyte phenotype and osteonecrosis: a bidirectional two-sample Mendelian randomization analysis
Source: Int J Surg. 2024 Mar 18;110(6):3285–93. doi: 10.1097/JS9.0000000000001327 (PMC11175804; doi:10.1097/JS9.0000000000001327)
Supplement: Supplementary file 4 [file js9-110-3285-s004.pdf]

| ID                                 | method                    | nsnp | b           | se         | pval        | OR(95%CI)                                                                                              |
|------------------------------------|---------------------------|------|-------------|------------|-------------|--------------------------------------------------------------------------------------------------------|
| Sw mem %B cell                     | MR Egger                  | 20   | -0.05731485 | 0.02801807 | 0.055690103 | 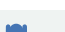 0.94(0.89 to 1.00) |
| Sw mem %B cell                     | Weighted median           | 20   | -0.04737803 | 0.02960026 | 0.109466608 | 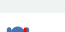 0.95(0.90 to 1.01) |
| Sw mem %B cell                     | Inverse variance weighted | 20   | -0.04322006 | 0.02075484 | 0.037305162 | 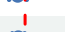 0.96(0.92 to 1.00) |
| Sw mem %B cell                     | Simple mode               | 20   | -0.02424207 | 0.04941802 | 0.629361225 | 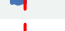 0.98(0.89 to 1.08) |
| Sw mem %B cell                     | Weighted mode             | 20   | -0.03795774 | 0.02986523 | 0.219081268 | 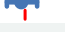 0.96(0.91 to 1.02) |
| IgD+ CD38br %B cell                | MR Egger                  | 20   | 0.03015618  | 0.02701760 | 0.279029512 | 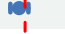 1.03(0.98 to 1.09) |
| IgD+ CD38br %B cell                | Weighted median           | 20   | 0.04218902  | 0.03217414 | 0.189766167 | 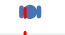 1.04(0.98 to 1.11) |
| IgD+ CD38br %B cell                | Inverse variance weighted | 20   | 0.04826186  | 0.02000107 | 0.015823391 | 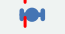 1.05(1.01 to 1.09) |
| IgD+ CD38br %B cell                | Simple mode               | 20   | 0.09056859  | 0.05283243 | 0.102747649 | 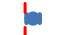 1.09(0.99 to 1.21) |
| IgD+ CD38br %B cell                | Weighted mode             | 20   | 0.05062541  | 0.03633102 | 0.179572033 | 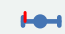 1.05(0.98 to 1.13) |
| CD62L- monocyte AC                 | MR Egger                  | 20   | -0.06798541 | 0.03065734 | 0.039690606 | 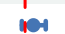 0.93(0.88 to 0.99) |
| CD62L- monocyte AC                 | Weighted median           | 20   | -0.07281590 | 0.03121466 | 0.019661420 | 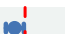 0.93(0.87 to 0.99) |
| CD62L- monocyte AC                 | Inverse variance weighted | 20   | -0.05063867 | 0.02267360 | 0.025524201 | 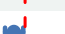 0.95(0.91 to 0.99) |
| CD62L- monocyte AC                 | Simple mode               | 20   | -0.05540208 | 0.04147573 | 0.197405477 | 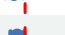 0.95(0.87 to 1.03) |
| CD62L- monocyte AC                 | Weighted mode             | 20   | -0.07184082 | 0.02767974 | 0.017757496 | 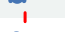 0.93(0.88 to 0.98) |
| CD62L- HLA DR++ monocyte AC        | MR Egger                  | 20   | -0.08149514 | 0.02863537 | 0.010724529 | 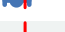 0.92(0.87 to 0.97) |
| CD62L- HLA DR++ monocyte AC        | Weighted median           | 20   | -0.07760637 | 0.02952767 | 0.008582303 | 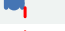 0.93(0.87 to 0.98) |
| CD62L- HLA DR++ monocyte AC        | Inverse variance weighted | 20   | -0.05650765 | 0.02133336 | 0.008077998 | 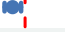 0.95(0.91 to 0.99) |
| CD62L- HLA DR++ monocyte AC        | Simple mode               | 20   | -0.07019678 | 0.04669835 | 0.149228538 | 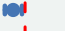 0.93(0.85 to 1.02) |
| CD62L- HLA DR++ monocyte AC        | Weighted mode             | 20   | -0.07702977 | 0.02829508 | 0.013519969 | 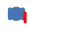 0.93(0.88 to 0.98) |
| CD62L- HLA DR++ monocyte %monocyte | MR Egger                  | 20   | -0.06184749 | 0.02919420 | 0.048305972 | 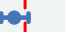 0.94(0.89 to 1.00) |
| CD62L- HLA DR++ monocyte %monocyte | Weighted median           | 20   | -0.04467961 | 0.03177426 | 0.159677497 | 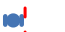 0.96(0.90 to 1.02) |
| CD62L- HLA DR++ monocyte %monocyte | Inverse variance weighted | 20   | -0.04475217 | 0.02174563 | 0.039591571 | 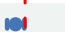 0.96(0.92 to 1.00) |
| CD62L- HLA DR++ monocyte %monocyte | Simple mode               | 20   | -0.07721380 | 0.05123754 | 0.148263230 | 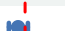 0.93(0.84 to 1.02) |
| CD62L- HLA DR++ monocyte %monocyte | Weighted mode             | 20   | -0.04174465 | 0.02763400 | 0.147336449 | 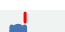 0.96(0.91 to 1.01) |
| Naive DN (CD4-CD8-) %DN            | MR Egger                  | 20   | 0.03278738  | 0.02509536 | 0.207826827 | 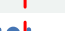 1.03(0.98 to 1.09) |
| Naive DN (CD4-CD8-) %DN            | Weighted median           | 20   | 0.03470539  | 0.02573802 | 0.177526767 | 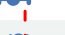 1.04(0.98 to 1.09) |
| Naive DN (CD4-CD8-) %DN            | Inverse variance weighted | 20   | 0.03958026  | 0.01856018 | 0.032962764 | 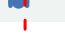 1.04(1.00 to 1.08) |
| Naive DN (CD4-CD8-) %DN            | Simple mode               | 20   | 0.05443078  | 0.03982421 | 0.187651801 | 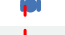 1.06(0.98 to 1.14) |
| Naive DN (CD4-CD8-) %DN            | Weighted mode             | 20   | 0.03729787  | 0.02433030 | 0.141763391 | 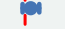 1.04(0.99 to 1.09) |
| CD28+ CD45RA+ CD8dim %CD8dim       | MR Egger                  | 20   | 0.05446331  | 0.02707564 | 0.059487097 | 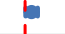 1.06(1.00 to 1.11) |
| CD28+ CD45RA+ CD8dim %CD8dim       | Weighted median           | 20   | 0.03559100  | 0.03090874 | 0.249532182 | 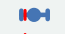 1.04(0.98 to 1.10) |
| CD28+ CD45RA+ CD8dim %CD8dim       | Inverse variance weighted | 20   | 0.04472626  | 0.02016986 | 0.026590319 | 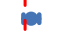 1.05(1.01 to 1.09) |
| CD28+ CD45RA+ CD8dim %CD8dim       | Simple mode               | 20   | 0.01776663  | 0.04540907 | 0.699960149 | 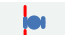 1.02(0.93 to 1.11) |
| CD28+ CD45RA+ CD8dim %CD8dim       | Weighted mode             | 20   | 0.03799059  | 0.03391030 | 0.276536988 | 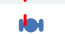 1.04(0.97 to 1.11) |
| CD28+ CD45RA+ CD8dim AC            | MR Egger                  | 20   | 0.05202402  | 0.02434137 | 0.046552430 | 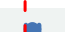 1.05(1.00 to 1.10) |
| CD28+ CD45RA+ CD8dim AC            | Weighted median           | 20   | 0.05657923  | 0.02586377 | 0.028699767 | 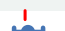 1.06(1.01 to 1.11) |
| CD28+ CD45RA+ CD8dim AC            | Inverse variance weighted | 20   | 0.03644414  | 0.01812089 | 0.044307805 | 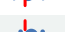 1.04(1.00 to 1.07) |
| CD28+ CD45RA+ CD8dim AC            | Simple mode               | 20   | 0.02607889  | 0.04174257 | 0.539562680 | 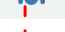 1.03(0.95 to 1.11) |
| CD28+ CD45RA+ CD8dim AC            | Weighted mode             | 20   | 0.04872757  | 0.02410838 | 0.057577703 | 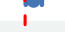 1.05(1.00 to 1.10) |
| CD45RA- CD28- CD8br %T cell        | MR Egger                  | 20   | 0.33062813  | 0.17064430 | 0.068533174 | 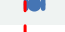 1.39(1.00 to 1.94) |
| CD45RA- CD28- CD8br %T cell        | Weighted median           | 20   | 0.22167940  | 0.19433273 | 0.253986090 | 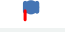 1.25(0.85 to 1.83) |
| CD45RA- CD28- CD8br %T cell        | Inverse variance weighted | 20   | 0.27293705  | 0.12464037 | 0.028538998 |                                                                                                        |
